# Supplementary material for: Developmental programming of Kupffer cells by maternal obesity causes fatty liver disease in the offspring
Source: Research Square preprint supplement (doi:10.21203/rs.3.rs-3242837/v1), 2023-08-11
Supplement: Supplementary file 1 [file 11f507bcf3a61bed7cd581a1.xlsx]

## Sheet: ANOVA_res_pVal<0.05
PLOT_NAME	metabolite	pVal_MOTHER_DIET	pVal_OFFSPRING_DIET	pVal_Int	pVal_HFD_CD.CD_vs_CD_CD.CD	pADJ_HFD_CD.CD_vs_CD_CD.CD
dimethyl sulfone	CHEMID_100004284	8.72553e-13	0.0698933	0.771373	5.3185e-06	0.00484515
2-pyrrolidinone	CHEMID_100001081	0.000267135	0.0273066	0.0742192	5.01706e-05	0.0208096
taurine	CHEMID_512	0.000145369	0.0240012	0.187668	6.85279e-05	0.0208096
methyl vanillate sulfate	CHEMID_100020622	0.000366844	0.0417157	0.655961	0.000637713	0.100451
leucylhydroxyproline*	CHEMID_100021261	0.000468842	0.166877	0.602679	0.000694583	0.100451
isoleucylhydroxyproline*	CHEMID_100021262	0.000253712	0.973099	0.541667	0.000707854	0.100451
5-hydroxylysine	CHEMID_100000054	0.000148875	0.974077	0.0364465	0.00119309	0.100451
3-aminoisobutyrate	CHEMID_1114	0.00297259	0.746981	0.162943	0.00133898	0.100451
indole-3-carboxylate	CHEMID_100002185	0.000229791	0.860027	0.369921	0.00145003	0.100451
glycylleucine	CHEMID_100001258	0.0176046	0.89031	0.156728	0.00152809	0.100451
xanthosine	CHEMID_100000299	0.673197	0.138807	0.000855812	0.00158097	0.100451
3-hydroxypalmitate	CHEMID_100000983	0.00206949	0.26208	0.0799277	0.00164374	0.100451
imidazole propionate	CHEMID_100003434	0.0401433	0.148289	0.00730036	0.00167587	0.100451
anthranilate	CHEMID_1258	0.00483836	0.47108	0.181633	0.00167978	0.100451
3-hydroxystearate	CHEMID_100008933	0.00864274	1.65305e-07	0.0575686	0.00170639	0.100451
gamma-glutamylvaline	CHEMID_100001126	0.00325941	0.183972	0.511558	0.00176423	0.100451
4-hydroxybutyrate (GHB)	CHEMID_100001507	0.00118284	0.00955475	0.267326	0.00253191	0.135681
phenylalanylhydroxyproline*	CHEMID_100021238	0.00209005	0.193835	0.699499	0.00292845	0.148212
hydantoin-5-propionate	CHEMID_100002514	0.0034249	0.159746	0.345306	0.00371276	0.178017
nicotinate ribonucleoside	CHEMID_100001316	0.127044	0.712618	0.072466	0.00467005	0.190944
lactate	CHEMID_482	0.00737638	0.672067	0.641899	0.00484485	0.190944
2-hydroxy-4-(methylthio)butanoic acid	CHEMID_100021372	0.00548752	0.0863503	0.0220572	0.00506282	0.190944
gamma-glutamylphenylalanine	CHEMID_100000491	0.00920907	0.0176908	0.637627	0.00558966	0.190944
allo-threonine	CHEMID_100000272	0.163642	0.299914	0.0113223	0.00559753	0.190944
myo-inositol	CHEMID_363	0.0138042	0.000856936	0.433178	0.00561464	0.190944
glutamate	CHEMID_561	0.196706	0.743811	0.0244499	0.00590861	0.190944
N-stearoyltaurine	CHEMID_100003240	0.000937948	4.02563e-09	0.613238	0.00594623	0.190944
gamma-glutamylhistidine	CHEMID_1235	0.00266344	0.138899	0.658125	0.00613229	0.190944
4-hydroxyhippurate	CHEMID_100001423	0.00437603	0.000306608	0.698476	0.00656523	0.190944
3-methylcytidine	CHEMID_100001466	0.00151995	0.913011	0.130858	0.00659561	0.190944
gamma-glutamyltryptophan	CHEMID_100001295	0.0237585	0.012281	0.449716	0.00660638	0.190944
sedoheptulose-7-phosphate	CHEMID_100001628	0.845463	0.150579	0.00356002	0.00670714	0.190944
N6-acetyllysine	CHEMID_100001734	0.0753983	0.00024367	0.251142	0.007178	0.198156
aspartate	CHEMID_234	0.360585	0.251999	0.0392349	0.00745426	0.19973
sphingomyelin (d18:2/24:2)*	CHEMID_100015789	0.0285544	0.890758	0.0257097	0.00863199	0.220811
N-delta-acetylornithine	CHEMID_100004523	0.674897	0.00064624	0.00191305	0.00872579	0.220811
daidzein	CHEMID_100001219	0.0938368	0.0752968	0.212805	0.00919464	0.224299
orotate	CHEMID_445	0.00508885	0.891027	0.140601	0.00935603	0.224299
sedoheptulose	CHEMID_100002619	0.0857033	0.369965	0.0947666	0.00972073	0.225555
2-methylbutyrylcarnitine (C5)	CHEMID_100001509	0.0316879	0.00613911	0.544108	0.00990361	0.225555
palmitoleate (16:1n7)	CHEMID_452	0.00894593	0.263041	0.533265	0.0105686	0.231594
N-alpha-acetylornithine	CHEMID_100000285	0.81001	3.85924e-05	0.0116219	0.0106772	0.231594
indoleacetylglycine	CHEMID_100006730	0.179319	0.00318963	0.0320889	0.0111843	0.236923
gamma-glutamylglutamate	CHEMID_331	0.00478427	0.854488	0.446887	0.011443	0.236923
gamma-glutamyltyrosine	CHEMID_1102	0.0301894	0.0408362	0.469049	0.0117076	0.237013
urate	CHEMID_1134	0.0799954	0.465522	0.265339	0.0121181	0.239991
cysteine	CHEMID_800	0.054371	0.131284	0.142689	0.0124169	0.240677
N-acetylthreonine	CHEMID_100001274	0.0190122	0.0114702	0.71767	0.0128012	0.242957
myristoleate (14:1n5)	CHEMID_100001198	0.0179497	0.000728997	0.118343	0.0135899	0.250041
S-methylglutathione	CHEMID_100001259	0.0191796	0.000440333	0.154194	0.0142086	0.250041
hippurate	CHEMID_100000014	0.0140357	0.641428	0.14806	0.0142653	0.250041
N-acetylalanine	CHEMID_1110	0.0174507	0.406934	0.771729	0.0144853	0.250041
methyl-4-hydroxybenzoate sulfate	CHEMID_100006116	0.0410569	0.0293949	0.505949	0.01487	0.250041
ribulose/xylulose	CHEMID_100006122	0.711014	0.62787	0.0218925	0.0149315	0.250041
myristate (14:0)	CHEMID_519	0.0150272	0.171568	0.283046	0.0152486	0.250041
sucrose	CHEMID_935	0.0859703	0.00616807	0.0775112	0.0153702	0.250041
beta-hydroxyisovalerate	CHEMID_1442	0.0223613	0.207346	0.492815	0.0163236	0.260348
pimeloylcarnitine/3-methyladipoylcarnitine (C7-DC)	CHEMID_100009407	0.0102094	0.0748496	0.797583	0.0165754	0.260348
sphingosine	CHEMID_297	0.292139	0.0382093	0.153514	0.0172995	0.267116
uracil	CHEMID_825	0.000379292	0.506566	0.817121	0.0186515	0.283193
3-methylglutaconate	CHEMID_100002458	0.0963872	0.575628	0.355444	0.0199304	0.285228
C-glycosyltryptophan	CHEMID_100006379	0.00103915	0.0520056	0.0567473	0.0200514	0.285228
3-(4-hydroxyphenyl)lactate (HPLA)	CHEMID_240	0.0309397	0.758792	0.547867	0.0201188	0.285228
uridine	CHEMID_535	0.14319	0.0451378	0.0662217	0.0205666	0.285228
gamma-glutamyl-alpha-lysine	CHEMID_100010901	0.00976589	0.0250631	0.303872	0.0208359	0.285228
3-hydroxyhexanoate	CHEMID_100006367	0.00482309	0.175035	0.588272	0.0213039	0.285228
gamma-glutamylleucine	CHEMID_1268	0.0168532	0.00250644	0.797547	0.0215547	0.285228
3-hydroxy-3-methylglutarate	CHEMID_112	0.0558826	0.00050349	0.524843	0.0216511	0.285228
prolylhydroxyproline	CHEMID_100001167	0.00417563	0.638268	0.493089	0.0220477	0.285228
4-hydroxycinnamate	CHEMID_100001675	0.0414774	0.640094	0.471577	0.0221016	0.285228
2,6-dihydroxybenzoic acid	CHEMID_100020837	0.457648	1.56348e-06	0.113141	0.0222889	0.285228
N-acetylglucosamine 6-phosphate	CHEMID_1213	0.0139157	0.110424	0.875021	0.0229044	0.285228
5-oxoproline	CHEMID_1021	0.306868	0.521708	0.142014	0.0230358	0.285228
4-hydroxyphenylpyruvate	CHEMID_1141	0.00025681	0.0497208	0.510032	0.0231689	0.285228
mannose	CHEMID_803	0.477535	1.35991e-05	0.0259513	0.0238858	0.285383
N-acetylputrescine	CHEMID_192	0.011615	0.14223	0.298797	0.0243297	0.285383
N-acetylserine	CHEMID_100001851	0.00216655	0.0186045	0.920507	0.0249882	0.285383
phenylacetate	CHEMID_100000011	0.00692899	0.0734331	0.53372	0.0257515	0.285383
N-acetylproline	CHEMID_100001334	0.325836	0.0859391	0.213914	0.0257785	0.285383
10-undecenoate (11:1n1)	CHEMID_100001197	0.0679351	4.7669e-06	0.250894	0.0257871	0.285383
glu-gly-asn-val**	CHEMID_100021107	0.190014	0.219719	0.0567187	0.0258909	0.285383
2,3-dihydroxy-5-methylthio-4-pentenoate (DMTPA)*	CHEMID_100020893	0.150992	0.0920205	0.0436935	0.0259053	0.285383
daidzein sulfate (2)	CHEMID_100006363	0.175425	0.0263603	0.274762	0.0262992	0.285383
succinate	CHEMID_252	0.0066077	0.332354	0.651666	0.0263977	0.285383
glycylvaline	CHEMID_100000487	0.0691501	0.473722	0.124815	0.0268659	0.285383
glutamine	CHEMID_563	0.166489	0.000800458	0.384055	0.0269407	0.285383
5-hydroxyhexanoate	CHEMID_100001148	0.0262472	0.870237	0.729847	0.0273109	0.28578
3-hydroxydecanoate	CHEMID_100000997	0.125217	0.00468031	0.286319	0.0276055	0.28578
genistein sulfate*	CHEMID_100020207	0.123287	0.114087	0.25101	0.028228	0.288941
gamma-glutamylisoleucine*	CHEMID_100001485	0.0480079	0.207137	0.579141	0.0286469	0.28997
3-hydroxypyridine sulfate	CHEMID_100006098	0.387565	3.91989e-07	0.133506	0.0292841	0.293163
phenol glucuronide	CHEMID_100006679	0.0196467	0.0891617	0.249974	0.0299551	0.296621
cystathionine	CHEMID_310	0.00759595	0.114745	0.0881347	0.0304692	0.296961
N-linoleoyltaurine*	CHEMID_100005814	0.0271512	0.227362	0.0714664	0.0311242	0.296961
3-hydroxyisobutyrate	CHEMID_111	0.393791	0.16922	0.120237	0.0315367	0.296961
hexanoylglycine (C6)	CHEMID_100001527	0.364507	0.0952943	0.187925	0.0315441	0.296961
N-stearoylserine*	CHEMID_100019957	0.296016	0.74495	0.218065	0.0316193	0.296961
S-(3-hydroxypropyl)mercapturic acid (HPMA)	CHEMID_100004568	0.0311154	0.421142	0.0363379	0.0319597	0.297094
glucose	CHEMID_572	0.0265237	0.0362844	0.0977398	0.0335954	0.307812
3-ureidoisobutyrate	CHEMID_100001531	0.000512035	0.0150856	0.623707	0.0337883	0.307812
equol sulfate	CHEMID_100003429	0.0989402	0.581493	0.540731	0.0348438	0.31025
N-acetylcarnosine	CHEMID_100004046	0.0133167	0.125057	0.0621425	0.0349466	0.31025
12-HETE	CHEMID_100002167	0.0686353	0.0829287	0.188537	0.0356273	0.31025
4-imidazoleacetate	CHEMID_100001207	0.304092	0.104463	0.290316	0.0357316	0.31025
neopentyl glycol azelate**	CHEMID_100022017	0.436163	0.000256073	0.111466	0.0357587	0.31025
proline	CHEMID_480	0.126921	0.00119205	0.403515	0.0361483	0.310671
4-hydroxyglutamate	CHEMID_100002544	0.0146652	0.00622409	0.681005	0.036572	0.311375
1-pentadecanoyl-GPC (15:0)*	CHEMID_100002173	0.0143374	0.196887	0.911114	0.0369531	0.311706
valylleucine	CHEMID_100003210	0.16155	0.625542	0.361455	0.0375891	0.314162
glucose 6-phosphate	CHEMID_291	0.714449	0.211641	0.0912102	0.0386566	0.320147
5-hydroxyindoleacetate	CHEMID_71	0.0870666	0.942416	0.131593	0.0393906	0.322213
glutarate (C5-DC)	CHEMID_339	0.150074	0.0546475	0.114355	0.0397911	0.322213
5-aminovalerate	CHEMID_100000454	0.000950596	0.435876	0.434845	0.040165	0.322213
phosphoethanolamine (PE)	CHEMID_1026	0.104431	0.00305821	0.651838	0.0403209	0.322213
palmitoleamide (16:1)*	CHEMID_100020753	0.0414125	0.118226	0.306353	0.04246	0.334335
carnosine	CHEMID_249	0.0154308	0.0543753	0.139243	0.0425718	0.334335
7-methylguanine	CHEMID_100001456	0.0832668	0.957107	0.284655	0.0434655	0.338437
indolin-2-one	CHEMID_100004318	0.00547427	0.0601011	0.593288	0.0457961	0.349624
1-stearoyl-2-arachidonoyl-GPI (18:0/20:4)	CHEMID_100000616	0.0842569	3.7924e-05	0.300803	0.0463249	0.349624
malonate	CHEMID_818	0.0258083	0.571737	0.130754	0.0468493	0.349624
2-arachidonoylglycerol (20:4)	CHEMID_100000584	0.612259	0.0485208	0.0534094	0.0480892	0.349624
2'-O-methyluridine	CHEMID_100010896	0.00627564	0.385912	0.626328	0.048158	0.349624
1-stearoyl-2-meadoyl-GPC (18:0/20:3n9)*	CHEMID_100009153	0.0106174	0.0202411	0.398008	0.0483874	0.349624
1-palmitoyl-2-palmitoleoyl-GPC (16:0/16:1)*	CHEMID_100008984	0.00311569	0.013805	0.496715	0.0484371	0.349624
nicotinamide riboside	CHEMID_100001310	0.0103841	0.048234	0.536922	0.0487775	0.349624
sphinganine	CHEMID_313	0.496803	0.0593924	0.176721	0.0489554	0.349624
hypotaurine	CHEMID_358	0.0189041	0.47856	0.897316	0.0490811	0.349624
thiamin (vitamin B1)	CHEMID_873	0.172566	0.037712	0.346852	0.0491239	0.349624
heptadecenamide (17:1)*	CHEMID_100020759	0.0430261	0.18813	0.346763	0.0499552	0.352784
