# Supplementary material for: Developmental programming of Kupffer cells by maternal obesity causes fatty liver disease in the offspring
Source: Research Square preprint supplement (doi:10.21203/rs.3.rs-3242837/v1), 2023-08-11
Supplement: Supplementary file 2 [file 2a8609c8ba0ac17ed3d62386.xlsx]

## Sheet: turquoise
	ID	Description	GeneRatio	BgRatio	pvalue	p.adjust	qvalue	geneID	Count	GeneRatio_perc	geneID_SYMBOL
KEGG_OXIDATIVE_PHOSPHORYLATION	KEGG_OXIDATIVE_PHOSPHORYLATION	KEGG_OXIDATIVE_PHOSPHORYLATION	34/162	100/1581	1.6289e-11	1.77551e-09	1.71464e-09	67264/11974/67680/22272/114143/66416/28080/66290/17992/68342/12859/66916/67126/68375/12867/57423/12858/20463/12866/226646/11958/66377/12864/72900/11957/230075/66108/11973/68349/228033/68194/12856/66046/68202	34	0.2099	Ndufb8/Atp6v0e/Sdhb/Uqcrq/Atp6v0b/Ndufa7/Atp5o/Atp6v1g1/Ndufa4/Ndufb10/Cox5b/Ndufb7/Atp5e/Ndufa8/Cox7c/Atp5j2/Cox5a/Cox7a2l/Cox7a2/Ndufs2/Atp5k/Ndufc1/Cox6c/Ndufv2/Atp5j/Ndufb6/Ndufa9/Atp6v1e1/Ndufs3/Atp5g3/Ndufb4/Cox17/Ndufb5/Ndufa5
KEGG_PARKINSONS_DISEASE	KEGG_PARKINSONS_DISEASE	KEGG_PARKINSONS_DISEASE	32/162	92/1581	3.59689e-11	1.9603e-09	1.8931e-09	22187/11740/67264/67680/22272/66416/28080/57320/17992/68342/12859/56791/66916/67126/68375/12867/12858/20463/12866/226646/66377/12864/72900/11957/22335/230075/66108/68349/228033/68194/66046/68202	32	0.1975	Ubb/Slc25a5/Ndufb8/Sdhb/Uqcrq/Ndufa7/Atp5o/Park7/Ndufa4/Ndufb10/Cox5b/Ube2l6/Ndufb7/Atp5e/Ndufa8/Cox7c/Cox5a/Cox7a2l/Cox7a2/Ndufs2/Ndufc1/Cox6c/Ndufv2/Atp5j/Vdac3/Ndufb6/Ndufa9/Ndufs3/Atp5g3/Ndufb4/Ndufb5/Ndufa5
KEGG_HUNTINGTONS_DISEASE	KEGG_HUNTINGTONS_DISEASE	KEGG_HUNTINGTONS_DISEASE	34/162	109/1581	2.52235e-10	9.16453e-09	8.85034e-09	11740/67264/11772/67680/22272/66416/28080/17992/68342/11773/12859/66916/67126/68375/12867/12858/20463/12866/226646/66377/12864/72900/11957/22335/67710/230075/66108/68349/228033/68194/12913/66046/18796/68202	34	0.2099	Slc25a5/Ndufb8/Ap2a2/Sdhb/Uqcrq/Ndufa7/Atp5o/Ndufa4/Ndufb10/Ap2m1/Cox5b/Ndufb7/Atp5e/Ndufa8/Cox7c/Cox5a/Cox7a2l/Cox7a2/Ndufs2/Ndufc1/Cox6c/Ndufv2/Atp5j/Vdac3/Polr2g/Ndufb6/Ndufa9/Ndufs3/Atp5g3/Ndufb4/Creb3/Ndufb5/Plcb2/Ndufa5
KEGG_ALZHEIMERS_DISEASE	KEGG_ALZHEIMERS_DISEASE	KEGG_ALZHEIMERS_DISEASE	30/162	101/1581	1.29835e-08	3.538e-07	3.4167e-07	67264/67680/22272/66416/28080/17992/68342/12859/66916/67126/68375/12867/12858/20463/12866/226646/66377/12864/72900/11957/230075/66108/68349/66340/228033/68194/66046/12315/18796/68202	30	0.1852	Ndufb8/Sdhb/Uqcrq/Ndufa7/Atp5o/Ndufa4/Ndufb10/Cox5b/Ndufb7/Atp5e/Ndufa8/Cox7c/Cox5a/Cox7a2l/Cox7a2/Ndufs2/Ndufc1/Cox6c/Ndufv2/Atp5j/Ndufb6/Ndufa9/Ndufs3/Psenen/Atp5g3/Ndufb4/Ndufb5/Calm3/Plcb2/Ndufa5
KEGG_PROTEASOME	KEGG_PROTEASOME	KEGG_PROTEASOME	14/162	40/1581	1.75485e-05	0.000382556	0.000369441	19175/19188/26444/26445/66537/26443/19182/19171/19170/23996/19185/21762/17463/23997	14	0.0864	Psmb6/Psme2/Psma7/Psmb2/Pomp/Psma6/Psmc3/Psmb10/Psmb1/Psmc4/Psmd4/Psmd2/Psmd7/Psmd13
HALLMARK_OXIDATIVE_PHOSPHORYLATION	HALLMARK_OXIDATIVE_PHOSPHORYLATION	HALLMARK_OXIDATIVE_PHOSPHORYLATION	49/163	142/1607	4.09611e-17	1.6794e-15	1.63844e-15	11740/67264/11974/67680/22272/114143/66416/28080/17448/66290/17992/12859/66916/67126/68375/12867/57423/12858/20463/12866/226646/11958/30055/66377/66383/12864/72900/11957/22335/230075/66108/11973/14661/110446/68349/228033/11757/110842/68194/231086/12856/17713/66865/66046/56451/11364/24030/13177/68202	49	0.3006	Slc25a5/Ndufb8/Atp6v0e/Sdhb/Uqcrq/Atp6v0b/Ndufa7/Atp5o/Mdh2/Atp6v1g1/Ndufa4/Cox5b/Ndufb7/Atp5e/Ndufa8/Cox7c/Atp5j2/Cox5a/Cox7a2l/Cox7a2/Ndufs2/Atp5k/Timm13/Ndufc1/Iscu/Cox6c/Ndufv2/Atp5j/Vdac3/Ndufb6/Ndufa9/Atp6v1e1/Glud1/Acat1/Ndufs3/Atp5g3/Prdx3/Etfa/Ndufb4/Hadhb/Cox17/Grpel1/Pmpca/Ndufb5/Suclg1/Acadm/Mrps12/Eci1/Ndufa5
HALLMARK_DNA_REPAIR	HALLMARK_DNA_REPAIR	HALLMARK_DNA_REPAIR	14/163	60/1607	0.00187582	0.0384544	0.0375165	382985/27061/56438/20922/59022/67710/19718/66162/12856/22247/66464/56436/21343/75062	14	0.0859	Rrm2b/Bcap31/Rbx1/Supt4a/Edf1/Polr2g/Rfc2/Bola2/Cox17/Umps/Taf12/Adrm1/Taf6/Sf3a3
GO:0007005	GO:0007005	mitochondrion organization	54/399	206/3883	1.62929e-11	4.54735e-08	4.54735e-08	Slc25a5/Ndufb8/Rrm2b/Map1lc3b/Atpif1/Coa3/Park7/Ndufb10/Bcap31/Ndufb7/Ndufa12/Ndufa8/Cox14/Cox7a2l/Cox7a2/Pycard/Ndufs2/Gba/Mrpl17/Dynlt1b/Timm13/Ndufb11/Timm23/Phb/Ndufc1/Micos13/Fis1/Romo1/Uqcc2/Aip/Higd1a/Ndufb6/Ndufa9/Ndufs3/Dnajc15/Tomm20/Tomm5/Pet100/Lonp1/Mpv17/Prdx3/Timm22/Ndufb4/Cox17/Grpel1/Pmpca/Ndufb5/Ndufaf8/Slirp/Smim20/Pmpcb/Ndufa5/Rab29/Atg5
GO:0033108	GO:0033108	mitochondrial respiratory chain complex assembly	21/399	45/3883	3.91785e-10	5.46737e-07	5.46737e-07	Ndufb8/Coa3/Ndufb10/Ndufb7/Ndufa12/Ndufa8/Cox14/Ndufs2/Ndufb11/Ndufc1/Uqcc2/Ndufb6/Ndufa9/Ndufs3/Pet100/Ndufb4/Cox17/Ndufb5/Ndufaf8/Smim20/Ndufa5
GO:0045333	GO:0045333	cellular respiration	35/399	119/3883	3.02238e-09	2.81182e-06	2.81182e-06	Ndufb8/Sdhb/Uqcrq/Ndufa7/Rhoa/Atp5o/Mdh2/Park7/Cox5b/Ndufa12/Atp5e/Ndufa8/Cox7c/Atp5j2/Cox5a/Cox7a2l/Cox7a2/Ndufs2/Gba/Atp5k/Iscu/Uqcc2/Ndufv2/Atp5j/Ndufb6/Ndufs3/Dnajc15/Bloc1s1/Trap1/Etfa/Suclg1/Gadd45gip1/Nop53/Ndufa5/Nupr1
GO:0006119	GO:0006119	oxidative phosphorylation	26/399	76/3883	1.09922e-08	6.13583e-06	6.13583e-06	Ndufb8/Uqcrq/Ndufa7/Rhoa/Atp5o/Park7/Cox5b/Ndufa12/Atp5e/Ndufa8/Cox7c/Atp5j2/Cox5a/Cox7a2l/Cox7a2/Ndufs2/Atp5k/Iscu/Uqcc2/Ndufv2/Atp5j/Ndufb6/Ndufs3/Dnajc15/Gadd45gip1/Nupr1
GO:0032543	GO:0032543	mitochondrial translation	12/399	21/3883	1.46868e-07	5.85582e-05	5.85582e-05	Ndufa7/Coa3/Uqcc2/Mrps14/Mrps21/Mrpl2/Chchd1/Mrps18a/Mrps12/Mrps16/Mrpl58/Mrps34
GO:0010257	GO:0010257	NADH dehydrogenase complex assembly	15/399	35/3883	5.46802e-07	0.00016957	0.00016957	Ndufb8/Ndufb10/Ndufb7/Ndufa12/Ndufa8/Ndufs2/Ndufb11/Ndufc1/Ndufb6/Ndufa9/Ndufs3/Ndufb4/Ndufb5/Ndufaf8/Ndufa5
GO:0140053	GO:0140053	mitochondrial gene expression	13/399	28/3883	1.04253e-06	0.00029097	0.00029097	Ndufa7/Coa3/Uqcc2/Mrps14/Mrps21/Mrpl2/Chchd1/Mrps18a/Mrps12/Mthfs/Mrps16/Mrpl58/Mrps34
GO:0006626	GO:0006626	protein targeting to mitochondrion	14/399	33/3883	1.53477e-06	0.000389412	0.000389412	Atpif1/Bcap31/Timm13/Timm23/Fis1/Romo1/Aip/Dnajc15/Tomm20/Tomm5/Timm22/Grpel1/Pmpca/Pmpcb
GO:0042254	GO:0042254	ribosome biogenesis	27/399	101/3883	1.72248e-06	0.000400619	0.000400619	Rps14/Rpl35/Rps15/Rps8/Rps16/Rpl38/Eif6/Rps27l/Ran/Rrp7a/Nsa2/Rps27rt/Snu13/Fcf1/Wdr18/Trmt112/Nhp2/Pih1d1/Exosc10/Nop53/Mrps7/Exosc7/Exosc8/Mrpl36/Dhx30/Ddx56/Ebna1bp2
GO:0022904	GO:0022904	respiratory electron transport chain	19/399	58/3883	2.35079e-06	0.000481403	0.000481403	Ndufb8/Sdhb/Uqcrq/Ndufa7/Park7/Cox5b/Ndufa12/Ndufa8/Cox7c/Cox5a/Ndufs2/Gba/Iscu/Ndufv2/Ndufb6/Ndufs3/Dnajc15/Etfa/Ndufa5
GO:1903715	GO:1903715	regulation of aerobic respiration	10/399	18/3883	2.41478e-06	0.000481403	0.000481403	Rhoa/Park7/Cox7a2l/Cox7a2/Iscu/Uqcc2/Dnajc15/Gadd45gip1/Nop53/Nupr1
GO:0006364	GO:0006364	rRNA processing	21/399	69/3883	2.6625e-06	0.000495403	0.000495403	Rps14/Rpl35/Rps15/Rps8/Rps16/Eif6/Rrp7a/Nsa2/Rps27rt/Snu13/Fcf1/Wdr18/Trmt112/Nhp2/Pih1d1/Exosc10/Nop53/Exosc7/Exosc8/Ddx56/Ebna1bp2
GO:0065003	GO:0065003	protein-containing complex assembly	77/399	469/3883	7.39199e-06	0.00114617	0.00114617	Cyba/Pfn1/Rps14/Vamp8/Rack1/Ndufb8/Aif1/Rhoa/Rps15/Arpc4/Coa3/Park7/Pomp/Ndufb10/Alox5ap/Ap2m1/Tspan4/Cct3/Ndufb7/Chmp2a/Ndufa12/Ndufa8/Rpl38/Cox14/Cox7a2l/Cox7a2/Eif6/Rps27l/Pycard/Ndufs2/Gba/Ndufb11/Tmsb10/Rrp7a/Ndufc1/Sumo1/Uqcc2/Higd1a/Snu13/Chrac1/Ndufb6/Ndufa9/Ndufs3/Snrpd2/Dnajc15/Cenpx/Lsm4/Pdcd6/Snrpe/Pet100/Atp5g3/Lonp1/Ndufb4/Cox17/Fkbp4/Pih1d1/Ndufb5/Ndufaf8/Ripk1/Drg1/Brd2/Acot13/Nin…
GO:0017004	GO:0017004	cytochrome complex assembly	7/399	10/3883	1.04866e-05	0.00154042	0.00154042	Cyba/Coa3/Cox14/Uqcc2/Pet100/Cox17/Smim20
GO:0046034	GO:0046034	ATP metabolic process	31/399	136/3883	1.13394e-05	0.00158241	0.00158241	Ndufb8/Uqcrq/Ndufa7/Rhoa/Atp5o/Atpif1/Park7/Cox5b/Ndufa12/Atp5e/Ndufa8/Cox7c/Atp5j2/Khk/Cox5a/Cox7a2l/Cox7a2/Eif6/Ndufs2/Atp5k/Fis1/Iscu/Uqcc2/Ndufv2/Atp5j/Ndufb6/Ndufs3/Dnajc15/Atp5g3/Gadd45gip1/Nupr1
GO:0016072	GO:0016072	rRNA metabolic process	21/399	77/3883	1.80169e-05	0.00239453	0.00239453	Rps14/Rpl35/Rps15/Rps8/Rps16/Eif6/Rrp7a/Nsa2/Rps27rt/Snu13/Fcf1/Wdr18/Trmt112/Nhp2/Pih1d1/Exosc10/Nop53/Exosc7/Exosc8/Ddx56/Ebna1bp2
GO:0042775	GO:0042775	mitochondrial ATP synthesis coupled electron transport	15/399	47/3883	3.94638e-05	0.00458931	0.00458931	Ndufb8/Uqcrq/Ndufa7/Park7/Cox5b/Ndufa12/Ndufa8/Cox7c/Cox5a/Ndufs2/Iscu/Ndufv2/Ndufb6/Ndufs3/Dnajc15
GO:0072655	GO:0072655	establishment of protein localization to mitochondrion	14/399	45/3883	9.79656e-05	0.00976507	0.00976507	Atpif1/Bcap31/Timm13/Timm23/Fis1/Romo1/Aip/Dnajc15/Tomm20/Tomm5/Timm22/Grpel1/Pmpca/Pmpcb
GO:0002082	GO:0002082	regulation of oxidative phosphorylation	7/399	13/3883	0.000113746	0.0109471	0.0109471	Rhoa/Cox7a2l/Cox7a2/Uqcc2/Dnajc15/Gadd45gip1/Nupr1
GO:0070585	GO:0070585	protein localization to mitochondrion	14/399	48/3883	0.000212026	0.0197104	0.0197104	Atpif1/Bcap31/Timm13/Timm23/Fis1/Romo1/Aip/Dnajc15/Tomm20/Tomm5/Timm22/Grpel1/Pmpca/Pmpcb
GO:0034470	GO:0034470	ncRNA processing	23/399	103/3883	0.000218926	0.0197104	0.0197104	Rps14/Rpl35/Rps15/Rps8/Rps16/Eif6/Rrp7a/Nsa2/Rps27rt/Snu13/Fcf1/Wdr18/Trmt112/Nhp2/Polr3k/Pih1d1/Ripk1/Exosc10/Nop53/Exosc7/Exosc8/Ddx56/Ebna1bp2
GO:0006839	GO:0006839	mitochondrial transport	16/399	60/3883	0.000241369	0.0210519	0.0210519	Slc25a5/Atpif1/Bcap31/Dynlt1b/Timm13/Timm23/Fis1/Romo1/Aip/Dnajc15/Tomm20/Tomm5/Timm22/Grpel1/Pmpca/Pmpcb
GO:0090501	GO:0090501	RNA phosphodiester bond hydrolysis	7/399	15/3883	0.000355018	0.0284936	0.0284936	Cpsf3/Fcf1/Nhp2/Polr3k/Exosc10/Exosc7/Exosc8

## Sheet: steelblue
	ID	Description	GeneRatio	BgRatio	pvalue	p.adjust	qvalue	geneID	Count	GeneRatio_perc	geneID_SYMBOL
KEGG_CHRONIC_MYELOID_LEUKEMIA	KEGG_CHRONIC_MYELOID_LEUKEMIA	KEGG_CHRONIC_MYELOID_LEUKEMIA	24/459	36/1581	2.45575e-06	0.000341349	0.00024299	18035/12048/11651/12575/21813/12567/19697/12443/13016/26413/26396/11652/18707/11350/26417/320207/20851/22059/26395/18033/14389/20416/19247/18709	24	0.0523	Nfkbia/Bcl2l1/Akt1/Cdkn1a/Tgfbr2/Cdk4/Rela/Ccnd1/Ctbp1/Mapk1/Map2k2/Akt2/Pik3cd/Abl1/Mapk3/Pik3r5/Stat5b/Trp53/Map2k1/Nfkb1/Gab2/Shc1/Ptpn11/Pik3r2
KEGG_NEUROTROPHIN_SIGNALING_PATHWAY	KEGG_NEUROTROPHIN_SIGNALING_PATHWAY	KEGG_NEUROTROPHIN_SIGNALING_PATHWAY	33/459	62/1581	3.92278e-05	0.00272633	0.00194074	192662/18035/19353/17164/20111/11651/16923/12988/19697/26413/26396/11652/22628/18707/18753/107746/11350/26417/320207/26406/54401/22059/20661/26395/16476/23939/16179/18033/11911/108058/20416/19247/18709	33	0.0719	Arhgdia/Nfkbia/Rac1/Mapkapk2/Rps6ka1/Akt1/Sh2b3/Csk/Rela/Mapk1/Map2k2/Akt2/Ywhag/Pik3cd/Prkcd/Rapgef1/Abl1/Mapk3/Pik3r5/Map3k3/Ywhab/Trp53/Sort1/Map2k1/Jun/Mapk7/Irak1/Nfkb1/Atf4/Camk2d/Shc1/Ptpn11/Pik3r2
KEGG_REGULATION_OF_ACTIN_CYTOSKELETON	KEGG_REGULATION_OF_ACTIN_CYTOSKELETON	KEGG_REGULATION_OF_ACTIN_CYTOSKELETON	40/459	82/1581	8.31123e-05	0.00278567	0.00198298	11465/11867/19354/17698/16408/16419/76709/16414/67938/19353/56378/101314/105855/109711/14673/12988/19303/22325/227753/26413/26396/242687/18717/18707/60595/16411/20430/16801/26417/320207/16402/22376/26395/20130/16409/20544/16401/56443/13367/18709	40	0.0871	Actg1/Arpc1b/Rac2/Msn/Itgal/Itgb5/Arpc2/Itgb2/Myl12b/Rac1/Arpc3/Brk1/Nckap1l/Actn1/Gna12/Csk/Pxn/Vav2/Gsn/Mapk1/Map2k2/Wasf2/Pip5k1c/Pik3cd/Actn4/Itgax/Cyfip1/Arhgef1/Mapk3/Pik3r5/Itga5/Was/Map2k1/Rras/Itgam/Slc9a1/Itga4/Arpc1a/Diaph1/Pik3r2
KEGG_FC_GAMMA_R_MEDIATED_PHAGOCYTOSIS	KEGG_FC_GAMMA_R_MEDIATED_PHAGOCYTOSIS	KEGG_FC_GAMMA_R_MEDIATED_PHAGOCYTOSIS	29/459	54/1581	9.53626e-05	0.00278567	0.00198298	11867/19354/76709/19353/14129/15162/56378/13430/17357/20963/14130/22323/11651/22325/227753/26413/242687/11652/18717/18707/18753/26417/320207/22376/26395/56632/14389/56443/18709	29	0.0632	Arpc1b/Rac2/Arpc2/Rac1/Fcgr1/Hck/Arpc3/Dnm2/Marcksl1/Syk/Fcgr2b/Vasp/Akt1/Vav2/Gsn/Mapk1/Wasf2/Akt2/Pip5k1c/Pik3cd/Prkcd/Mapk3/Pik3r5/Was/Map2k1/Sphk2/Gab2/Arpc1a/Pik3r2
KEGG_LYSOSOME	KEGG_LYSOSOME	KEGG_LYSOSOME	36/459	72/1581	0.000100204	0.00278567	0.00198298	13033/19156/16792/18173/15211/16783/11984/17159/75612/12751/100503676/11433/12512/64138/192654/11972/14387/54397/27029/11764/11776/27419/12091/106039/16541/56464/17939/27426/11769/11975/20661/18010/15932/18145/74105/214505	36	0.0784	Ctsd/Psap/Laptm5/Slc11a1/Hexa/Lamp1/Atp6v0c/Man2b1/Gns/Tpp1/Gm38426/Acp5/Cd63/Ctsz/Pla2g15/Atp6v0d1/Gaa/Ppt2/Sgsh/Ap1b1/Ap3d1/Naglu/Glb1/Gga1/Napsa/Ctsf/Naga/Nagpa/Ap1s1/Atp6v0a1/Sort1/Neu1/Idua/Npc1/Gga2/Gnptg
KEGG_MAPK_SIGNALING_PATHWAY	KEGG_MAPK_SIGNALING_PATHWAY	KEGG_MAPK_SIGNALING_PATHWAY	38/459	80/1581	0.000257101	0.00595618	0.00423992	19354/192176/19252/19353/17164/21937/16176/20111/14673/14281/11651/26403/216869/21813/19697/26413/26396/11652/26397/17187/26417/18034/26406/17347/22059/19698/109689/16765/19060/26395/16476/20130/102626/15370/23939/235584/18033/11911	38	0.0828	Rac2/Flna/Dusp1/Rac1/Mapkapk2/Tnfrsf1a/Il1b/Rps6ka1/Gna12/Fos/Akt1/Map3k11/Arrb2/Tgfbr2/Rela/Mapk1/Map2k2/Akt2/Map2k3/Max/Mapk3/Nfkb2/Map3k3/Mknk2/Trp53/Relb/Arrb1/Stmn1/Ppp5c/Map2k1/Jun/Rras/Mapkapk3/Nr4a1/Mapk7/Dusp7/Nfkb1/Atf4
KEGG_ACUTE_MYELOID_LEUKEMIA	KEGG_ACUTE_MYELOID_LEUKEMIA	KEGG_ACUTE_MYELOID_LEUKEMIA	17/459	28/1581	0.000427277	0.00712142	0.00506939	20375/11651/16480/12606/19697/12443/26413/26396/11652/18707/18854/26417/320207/20851/26395/18033/18709	17	0.037	Spi1/Akt1/Jup/Cebpa/Rela/Ccnd1/Mapk1/Map2k2/Akt2/Pik3cd/Pml/Mapk3/Pik3r5/Stat5b/Map2k1/Nfkb1/Pik3r2
KEGG_FOCAL_ADHESION	KEGG_FOCAL_ADHESION	KEGG_FOCAL_ADHESION	34/459	71/1581	0.0004544	0.00712142	0.00506939	11465/19354/192176/22793/16419/67938/19353/12445/21894/109711/12444/22323/11651/64099/19303/12443/22325/26413/11652/18717/18707/60595/107746/26417/320207/20750/16402/26395/16476/12334/20416/16401/13367/18709	34	0.0741	Actg1/Rac2/Flna/Zyx/Itgb5/Myl12b/Rac1/Ccnd3/Tln1/Actn1/Ccnd2/Vasp/Akt1/Parvg/Pxn/Ccnd1/Vav2/Mapk1/Akt2/Pip5k1c/Pik3cd/Actn4/Rapgef1/Mapk3/Pik3r5/Spp1/Itga5/Map2k1/Jun/Capn2/Shc1/Itga4/Diaph1/Pik3r2
KEGG_PENTOSE_PHOSPHATE_PATHWAY	KEGG_PENTOSE_PHOSPHATE_PATHWAY	KEGG_PENTOSE_PHOSPHATE_PATHWAY	10/459	13/1581	0.000461099	0.00712142	0.00506939	11674/21351/21881/14751/110208/14381/18641/66171/100198/56421	10	0.0218	Aldoa/Taldo1/Tkt/Gpi1/Pgd/G6pdx/Pfkl/Pgls/H6pd/Pfkp
KEGG_GAP_JUNCTION	KEGG_GAP_JUNCTION	KEGG_GAP_JUNCTION	17/459	30/1581	0.00128911	0.0163117	0.0116115	22143/14683/22146/104110/67951/227613/22151/26413/26396/11513/26417/104318/22142/104111/26395/23939/11554	17	0.037	Tuba1b/Gnas/Tuba1c/Adcy4/Tubb6/Tubb4b/Tubb2a/Mapk1/Map2k2/Adcy7/Mapk3/Csnk1d/Tuba1a/Adcy3/Map2k1/Mapk7/Adrb1
KEGG_B_CELL_RECEPTOR_SIGNALING_PATHWAY	KEGG_B_CELL_RECEPTOR_SIGNALING_PATHWAY	KEGG_B_CELL_RECEPTOR_SIGNALING_PATHWAY	23/459	45/1581	0.00129085	0.0163117	0.0116115	19354/18035/19353/18733/20963/14130/14281/11651/19697/22325/26413/26396/83490/11652/18707/17060/26417/320207/12229/26395/16476/18033/18709	23	0.0501	Rac2/Nfkbia/Rac1/Pirb/Syk/Fcgr2b/Fos/Akt1/Rela/Vav2/Mapk1/Map2k2/Pik3ap1/Akt2/Pik3cd/Blnk/Mapk3/Pik3r5/Btk/Map2k1/Jun/Nfkb1/Pik3r2
KEGG_COLORECTAL_CANCER	KEGG_COLORECTAL_CANCER	KEGG_COLORECTAL_CANCER	15/459	26/1581	0.00196088	0.0227136	0.0161687	19354/19353/14281/11651/21813/12443/26413/11652/18707/26417/320207/22059/26395/16476/18709	15	0.0327	Rac2/Rac1/Fos/Akt1/Tgfbr2/Ccnd1/Mapk1/Akt2/Pik3cd/Mapk3/Pik3r5/Trp53/Map2k1/Jun/Pik3r2
KEGG_CHEMOKINE_SIGNALING_PATHWAY	KEGG_CHEMOKINE_SIGNALING_PATHWAY	KEGG_CHEMOKINE_SIGNALING_PATHWAY	37/459	85/1581	0.00241814	0.0244348	0.0173939	19354/110355/18035/19353/15162/14693/20308/277360/13051/104110/11651/12988/216869/19303/19229/19697/14191/22325/26413/11652/56744/11513/18707/18753/26417/320207/26385/12772/20851/104111/22376/109689/26395/12775/18033/20416/18709	37	0.0806	Rac2/Grk2/Nfkbia/Rac1/Hck/Gnb2/Ccl9/Prex1/Cx3cr1/Adcy4/Akt1/Csk/Arrb2/Pxn/Ptk2b/Rela/Fgr/Vav2/Mapk1/Akt2/Pf4/Adcy7/Pik3cd/Prkcd/Mapk3/Pik3r5/Grk6/Ccr2/Stat5b/Adcy3/Was/Arrb1/Map2k1/Ccr7/Nfkb1/Shc1/Pik3r2
KEGG_SMALL_CELL_LUNG_CANCER	KEGG_SMALL_CELL_LUNG_CANCER	KEGG_SMALL_CELL_LUNG_CANCER	16/459	29/1581	0.00261535	0.0244348	0.0173939	18035/20181/12048/11651/12567/19697/12443/11652/18707/17187/320207/22059/59004/20182/18033/18709	16	0.0349	Nfkbia/Rxra/Bcl2l1/Akt1/Cdk4/Rela/Ccnd1/Akt2/Pik3cd/Max/Pik3r5/Trp53/Pias4/Rxrb/Nfkb1/Pik3r2
KEGG_PANCREATIC_CANCER	KEGG_PANCREATIC_CANCER	KEGG_PANCREATIC_CANCER	18/459	34/1581	0.00263684	0.0244348	0.0173939	19354/19353/12048/11651/21813/12567/19697/12443/26413/11652/18707/26417/320207/22059/26395/18033/19765/18709	18	0.0392	Rac2/Rac1/Bcl2l1/Akt1/Tgfbr2/Cdk4/Rela/Ccnd1/Mapk1/Akt2/Pik3cd/Mapk3/Pik3r5/Trp53/Map2k1/Nfkb1/Ralbp1/Pik3r2
KEGG_JAK_STAT_SIGNALING_PATHWAY	KEGG_JAK_STAT_SIGNALING_PATHWAY	KEGG_JAK_STAT_SIGNALING_PATHWAY	23/459	48/1581	0.00383476	0.0330891	0.0235545	20852/12445/12048/16154/12444/11651/12982/16190/15980/12984/12443/11652/16194/18707/12986/320207/20851/54721/59004/57914/19247/13857/18709	23	0.0501	Stat6/Ccnd3/Bcl2l1/Il10ra/Ccnd2/Akt1/Csf2ra/Il4ra/Ifngr2/Csf2rb2/Ccnd1/Akt2/Il6ra/Pik3cd/Csf3r/Pik3r5/Stat5b/Tyk2/Pias4/Crlf2/Ptpn11/Epor/Pik3r2
KEGG_HEMATOPOIETIC_CELL_LINEAGE	KEGG_HEMATOPOIETIC_CELL_LINEAGE	KEGG_HEMATOPOIETIC_CELL_LINEAGE	14/459	25/1581	0.00404687	0.0330891	0.0235545	12978/14969/14129/12527/16176/12982/16190/16194/12986/16402/16409/12493/16401/13857	14	0.0305	Csf1r/H2-Eb1/Fcgr1/Cd9/Il1b/Csf2ra/Il4ra/Il6ra/Csf3r/Itga5/Itgam/Cd37/Itga4/Epor
KEGG_ADIPOCYTOKINE_SIGNALING_PATHWAY	KEGG_ADIPOCYTOKINE_SIGNALING_PATHWAY	KEGG_ADIPOCYTOKINE_SIGNALING_PATHWAY	13/459	23/1581	0.00502859	0.0354791	0.0252559	18035/72674/20181/21938/21937/11651/19697/12894/11652/20869/20182/18033/19247	13	0.0283	Nfkbia/Adipor1/Rxra/Tnfrsf1b/Tnfrsf1a/Akt1/Rela/Cpt1a/Akt2/Stk11/Rxrb/Nfkb1/Ptpn11
KEGG_MELANOMA	KEGG_MELANOMA	KEGG_MELANOMA	13/459	23/1581	0.00502859	0.0354791	0.0252559	11651/12575/12567/12443/26413/26396/11652/18707/26417/320207/22059/26395/18709	13	0.0283	Akt1/Cdkn1a/Cdk4/Ccnd1/Mapk1/Map2k2/Akt2/Pik3cd/Mapk3/Pik3r5/Trp53/Map2k1/Pik3r2
KEGG_TOLL_LIKE_RECEPTOR_SIGNALING_PATHWAY	KEGG_TOLL_LIKE_RECEPTOR_SIGNALING_PATHWAY	KEGG_TOLL_LIKE_RECEPTOR_SIGNALING_PATHWAY	23/459	49/1581	0.00530575	0.0354791	0.0252559	54123/27056/18035/19353/16176/14281/11651/17874/19697/26413/26396/11652/26397/18707/26417/320207/20750/26395/16476/17087/16179/18033/18709	23	0.0501	Irf7/Irf5/Nfkbia/Rac1/Il1b/Fos/Akt1/Myd88/Rela/Mapk1/Map2k2/Akt2/Map2k3/Pik3cd/Mapk3/Pik3r5/Spp1/Map2k1/Jun/Ly96/Irak1/Nfkb1/Pik3r2
KEGG_LEISHMANIA_INFECTION	KEGG_LEISHMANIA_INFECTION	KEGG_LEISHMANIA_INFECTION	20/459	41/1581	0.00536016	0.0354791	0.0252559	14960/14969/16414/18035/14129/17357/14130/16176/14281/15980/17874/19697/26413/14999/26417/16476/16409/16179/18033/16401	20	0.0436	H2-Aa/H2-Eb1/Itgb2/Nfkbia/Fcgr1/Marcksl1/Fcgr2b/Il1b/Fos/Ifngr2/Myd88/Rela/Mapk1/H2-DMb1/Mapk3/Jun/Itgam/Irak1/Nfkb1/Itga4
KEGG_TYPE_II_DIABETES_MELLITUS	KEGG_TYPE_II_DIABETES_MELLITUS	KEGG_TYPE_II_DIABETES_MELLITUS	9/459	14/1581	0.00632176	0.039942	0.0284328	18746/212032/26413/18707/18753/26417/320207/16337/18709	9	0.0196	Pkm/Hk3/Mapk1/Pik3cd/Prkcd/Mapk3/Pik3r5/Insr/Pik3r2
KEGG_APOPTOSIS	KEGG_APOPTOSIS	KEGG_APOPTOSIS	17/459	34/1581	0.00739119	0.0428073	0.0304725	18035/12048/21937/16176/11651/17874/19697/19084/12984/11652/18707/320207/22059/12334/16179/18033/18709	17	0.037	Nfkbia/Bcl2l1/Tnfrsf1a/Il1b/Akt1/Myd88/Rela/Prkar1a/Csf2rb2/Akt2/Pik3cd/Pik3r5/Trp53/Capn2/Irak1/Nfkb1/Pik3r2
KEGG_FC_EPSILON_RI_SIGNALING_PATHWAY	KEGG_FC_EPSILON_RI_SIGNALING_PATHWAY	KEGG_FC_EPSILON_RI_SIGNALING_PATHWAY	17/459	34/1581	0.00739119	0.0428073	0.0304725	19354/19353/20963/11651/22325/26413/26396/11652/26397/18707/18753/26417/320207/12229/26395/14389/18709	17	0.037	Rac2/Rac1/Syk/Akt1/Vav2/Mapk1/Map2k2/Akt2/Map2k3/Pik3cd/Prkcd/Mapk3/Pik3r5/Btk/Map2k1/Gab2/Pik3r2
KEGG_VEGF_SIGNALING_PATHWAY	KEGG_VEGF_SIGNALING_PATHWAY	KEGG_VEGF_SIGNALING_PATHWAY	15/459	29/1581	0.00791348	0.043999	0.0313207	19354/19353/17164/11651/19303/26413/26396/11652/18707/26417/320207/26395/102626/56632/18709	15	0.0327	Rac2/Rac1/Mapkapk2/Akt1/Pxn/Mapk1/Map2k2/Akt2/Pik3cd/Mapk3/Pik3r5/Map2k1/Mapkapk3/Sphk2/Pik3r2
KEGG_GLYCOSAMINOGLYCAN_DEGRADATION	KEGG_GLYCOSAMINOGLYCAN_DEGRADATION	KEGG_GLYCOSAMINOGLYCAN_DEGRADATION	7/459	10/1581	0.00851666	0.0455314	0.0324116	15211/75612/27029/27419/12091/15932/15587	7	0.0153	Hexa/Gns/Sgsh/Naglu/Glb1/Idua/Hyal2
KEGG_GLYCOLYSIS_GLUCONEOGENESIS	KEGG_GLYCOLYSIS_GLUCONEOGENESIS	KEGG_GLYCOLYSIS_GLUCONEOGENESIS	14/459	27/1581	0.00995493	0.0475223	0.0338288	16828/14433/18746/13806/11674/11669/14751/21991/212032/18648/67689/18641/11532/56421	14	0.0305	Ldha/Gapdh/Pkm/Eno1/Aldoa/Aldh2/Gpi1/Tpi1/Hk3/Pgam1/Aldh3b1/Pfkl/Adh5/Pfkp
KEGG_NON_SMALL_CELL_LUNG_CANCER	KEGG_NON_SMALL_CELL_LUNG_CANCER	KEGG_NON_SMALL_CELL_LUNG_CANCER	14/459	27/1581	0.00995493	0.0475223	0.0338288	20181/11651/12567/12443/26413/26396/11652/18707/26417/320207/22059/26395/20182/18709	14	0.0305	Rxra/Akt1/Cdk4/Ccnd1/Mapk1/Map2k2/Akt2/Pik3cd/Mapk3/Pik3r5/Trp53/Map2k1/Rxrb/Pik3r2
KEGG_CYTOKINE_CYTOKINE_RECEPTOR_INTERACTION	KEGG_CYTOKINE_CYTOKINE_RECEPTOR_INTERACTION	KEGG_CYTOKINE_CYTOKINE_RECEPTOR_INTERACTION	24/459	54/1581	0.0102637	0.0475223	0.0338288	12978/20308/102595/13051/21938/16154/21937/16176/12982/16190/15980/17000/21813/11482/12984/56744/16194/12986/94185/12772/12775/21934/57914/13857	24	0.0523	Csf1r/Ccl9/Plekho2/Cx3cr1/Tnfrsf1b/Il10ra/Tnfrsf1a/Il1b/Csf2ra/Il4ra/Ifngr2/Ltbr/Tgfbr2/Acvrl1/Csf2rb2/Pf4/Il6ra/Csf3r/Tnfrsf21/Ccr2/Ccr7/Tnfrsf11a/Crlf2/Epor
KEGG_GNRH_SIGNALING_PATHWAY	KEGG_GNRH_SIGNALING_PATHWAY	KEGG_GNRH_SIGNALING_PATHWAY	17/459	35/1581	0.0105985	0.0475223	0.0338288	14683/104110/19229/26413/26396/26397/11513/18753/26417/26406/104111/17387/26395/16476/23939/11911/108058	17	0.037	Gnas/Adcy4/Ptk2b/Mapk1/Map2k2/Map2k3/Adcy7/Prkcd/Mapk3/Map3k3/Adcy3/Mmp14/Map2k1/Jun/Mapk7/Atf4/Camk2d
KEGG_PATHOGENIC_ESCHERICHIA_COLI_INFECTION	KEGG_PATHOGENIC_ESCHERICHIA_COLI_INFECTION	KEGG_PATHOGENIC_ESCHERICHIA_COLI_INFECTION	17/459	35/1581	0.0105985	0.0475223	0.0338288	11465/22143/11867/76709/22146/56378/15163/67951/227613/22151/16800/11350/13043/22142/22376/17087/56443	17	0.037	Actg1/Tuba1b/Arpc1b/Arpc2/Tuba1c/Arpc3/Hcls1/Tubb6/Tubb4b/Tubb2a/Arhgef2/Abl1/Cttn/Tuba1a/Was/Ly96/Arpc1a
KEGG_GLIOMA	KEGG_GLIOMA	KEGG_GLIOMA	15/459	30/1581	0.0116959	0.050227	0.0357541	11651/12575/12567/12443/26413/26396/11652/18707/26417/320207/22059/26395/108058/20416/18709	15	0.0327	Akt1/Cdkn1a/Cdk4/Ccnd1/Mapk1/Map2k2/Akt2/Pik3cd/Mapk3/Pik3r5/Trp53/Map2k1/Camk2d/Shc1/Pik3r2
KEGG_PATHWAYS_IN_CANCER	KEGG_PATHWAYS_IN_CANCER	KEGG_PATHWAYS_IN_CANCER	39/459	98/1581	0.0119244	0.050227	0.0357541	12978/19354/20375/18035/19353/20181/12048/14281/11651/16480/12606/12982/12575/21813/12567/19697/12443/13016/26413/26396/11652/18707/12986/11350/112406/18854/17187/26417/320207/18034/20851/22059/26395/16476/59004/20182/18033/19765/18709	39	0.085	Csf1r/Rac2/Spi1/Nfkbia/Rac1/Rxra/Bcl2l1/Fos/Akt1/Jup/Cebpa/Csf2ra/Cdkn1a/Tgfbr2/Cdk4/Rela/Ccnd1/Ctbp1/Mapk1/Map2k2/Akt2/Pik3cd/Csf3r/Abl1/Egln2/Pml/Max/Mapk3/Pik3r5/Nfkb2/Stat5b/Trp53/Map2k1/Jun/Pias4/Rxrb/Nfkb1/Ralbp1/Pik3r2
KEGG_DILATED_CARDIOMYOPATHY	KEGG_DILATED_CARDIOMYOPATHY	KEGG_DILATED_CARDIOMYOPATHY	11/459	21/1581	0.0199746	0.0793276	0.0564695	11465/16419/14683/104110/11513/326618/16905/104111/16402/11554/16401	11	0.024	Actg1/Itgb5/Gnas/Adcy4/Adcy7/Tpm4/Lmna/Adcy3/Itga5/Adrb1/Itga4
KEGG_VASOPRESSIN_REGULATED_WATER_REABSORPTION	KEGG_VASOPRESSIN_REGULATED_WATER_REABSORPTION	KEGG_VASOPRESSIN_REGULATED_WATER_REABSORPTION	11/459	21/1581	0.0199746	0.0793276	0.0564695	192662/14683/56455/19345/19326/13424/13191/19344/104111/69654/208647	11	0.024	Arhgdia/Gnas/Dynll1/Rab5c/Rab11b/Dync1h1/Dctn1/Rab5b/Adcy3/Dctn2/Creb3l2
KEGG_RENAL_CELL_CARCINOMA	KEGG_RENAL_CELL_CARCINOMA	KEGG_RENAL_CELL_CARCINOMA	15/459	32/1581	0.0233441	0.0901341	0.0641621	19353/11651/26413/26396/11652/18707/107746/216805/112406/26417/320207/26395/16476/19247/18709	15	0.0327	Rac1/Akt1/Mapk1/Map2k2/Akt2/Pik3cd/Rapgef1/Flcn/Egln2/Mapk3/Pik3r5/Map2k1/Jun/Ptpn11/Pik3r2
KEGG_BLADDER_CANCER	KEGG_BLADDER_CANCER	KEGG_BLADDER_CANCER	8/459	14/1581	0.0253581	0.0952641	0.0678139	12575/12567/12443/26413/26396/26417/22059/26395	8	0.0174	Cdkn1a/Cdk4/Ccnd1/Mapk1/Map2k2/Mapk3/Trp53/Map2k1
HALLMARK_UV_RESPONSE_UP	HALLMARK_UV_RESPONSE_UP	HALLMARK_UV_RESPONSE_UP	32/462	73/1607	0.00350736	0.0999562	0.0828305	15368/11674/110213/18412/18035/433375/12226/66168/103963/12445/14778/15894/16477/14281/11852/12227/216869/16362/18753/21354/59045/12799/56418/18391/17387/17308/71765/15370/11739/20182/59041/15587	32	0.0693	Hmox1/Aldoa/Tmbim6/Sqstm1/Nfkbia/Creg1/Btg1/Grina/Rpn1/Ccnd3/Gpx3/Icam1/Junb/Fos/Rhob/Btg2/Arrb2/Irf1/Prkcd/Tap1/Stard3/Cnp/Ykt6/Sigmar1/Mmp14/Mgat1/Klhdc3/Nr4a1/Slc25a4/Rxrb/Stk25/Hyal2
HALLMARK_P53_PATHWAY	HALLMARK_P53_PATHWAY	HALLMARK_P53_PATHWAY	32/462	74/1607	0.00454092	0.0999562	0.0828305	13033/15368/18081/21452/140570/19899/12226/20181/53421/12445/12444/14281/12606/20198/12227/12575/105501/17122/12521/21354/56464/217344/17347/76281/22059/12192/16476/102626/16179/18128/67442/12795	32	0.0693	Ctsd/Hmox1/Ninj1/Tcn2/Plxnb2/Rpl18/Btg1/Rxra/Sec61a1/Ccnd3/Ccnd2/Fos/Cebpa/S100a4/Btg2/Cdkn1a/Abhd4/Mxd4/Cd82/Tap1/Ctsf/Rhbdf2/Mknk2/Tax1bp3/Trp53/Zfp36l1/Jun/Mapkapk3/Irak1/Notch1/Retsat/Plk3
HALLMARK_APICAL_JUNCTION	HALLMARK_APICAL_JUNCTION	HALLMARK_APICAL_JUNCTION	26/462	59/1607	0.00762396	0.0999562	0.0828305	20970/11465/19354/19261/17698/22793/12331/76709/67938/20963/21810/109711/22323/15894/16480/22325/11652/12798/12908/60595/100017/18763/20130/68188/16332/20416	26	0.0563	Sdc3/Actg1/Rac2/Sirpa/Msn/Zyx/Cap1/Arpc2/Myl12b/Syk/Tgfbi/Actn1/Vasp/Icam1/Jup/Vav2/Akt2/Cnn2/Crat/Actn4/Ldlrap1/Pkd1/Rras/Sympk/Inppl1/Shc1
HALLMARK_IL6_JAK_STAT3_SIGNALING	HALLMARK_IL6_JAK_STAT3_SIGNALING	HALLMARK_IL6_JAK_STAT3_SIGNALING	23/462	51/1607	0.00850691	0.0999562	0.0828305	15368/12527/21938/21937/19246/16176/12982/16190/15980/17874/17000/11482/12984/16362/56744/12986/94185/320207/54721/16476/57914/19247/16401	23	0.0498	Hmox1/Cd9/Tnfrsf1b/Tnfrsf1a/Ptpn1/Il1b/Csf2ra/Il4ra/Ifngr2/Myd88/Ltbr/Acvrl1/Csf2rb2/Irf1/Pf4/Csf3r/Tnfrsf21/Pik3r5/Tyk2/Jun/Crlf2/Ptpn11/Itga4
GO:0016477	GO:0016477	cell migration	176/1091	427/3883	4.12671e-10	1.45508e-06	1.26668e-06	Cd74/Csf1r/Sdc3/Actg1/Lgals3/Grn/Axl/Lrp1/Hmox1/Arhgdia/Ninj1/Rac2/Spi1/Aldoa/Sirpa/Msn/Coro1b/Wdr1/Scarb1/Lgals9/Itgal/Flna/Itgb5/Dusp1/Fermt3/Cap1/Coro1a/Arpc2/Itgb2/C5ar1/Plxnb2/Rhog/Rac1/Gpi1/Vsir/Adipor1/Bst2/Acp5/Abi3/Cd63/Ccl9/Bin2/Prex1/Vim/Myo1f/Trem2/Coro1c/Syk/Cx3cr1/Cd9/Elmo2/Sgpl1/Stk10/Nckap1l/Dock8/Emilin2/Cdh5/Il1b/Gna12/Icam1/Akt1/Jup/Rhob/Nisch/Slc8b1/Myd88/Arrb2/Tgfbr2/Pxn/Eng/…
GO:0051674	GO:0051674	localization of cell	183/1091	453/3883	1.24375e-09	1.46182e-06	1.27255e-06	Cd74/Csf1r/Sdc3/Actg1/Lgals3/Grn/Pltp/Axl/Lrp1/Hmox1/Arhgdia/Ninj1/Rac2/Spi1/Aldoa/Sirpa/Msn/Coro1b/Wdr1/Scarb1/Lgals9/Itgal/Flna/Itgb5/Dusp1/Fermt3/Cap1/Coro1a/Arpc2/Itgb2/C5ar1/Plxnb2/Rhog/Rac1/Gpi1/Vsir/Adipor1/Bst2/Acp5/Abi3/Cd63/Ccl9/Bin2/Prex1/Vim/Myo1f/Trem2/Coro1c/Syk/Cx3cr1/Cd9/Brk1/Igsf8/Elmo2/Sgpl1/Fes/Stk10/Nckap1l/Dock8/Emilin2/Cdh5/Il1b/Gna12/Icam1/Akt1/Jup/Rhob/Nisch/Slc8b1/Myd88/A…
GO:0040011	GO:0040011	locomotion	190/1091	480/3883	4.09362e-09	3.60852e-06	3.14131e-06	Cd74/Csf1r/Sdc3/Actg1/Lgals3/Grn/Pltp/Axl/Lrp1/Hmox1/Arhgdia/Ninj1/Rac2/Spi1/Aldoa/Sirpa/Msn/Coro1b/Wdr1/Scarb1/Lgals9/Itgal/Flna/Itgb5/Dusp1/Fermt3/Cap1/Coro1a/Arpc2/Itgb2/C5ar1/Plxnb2/Rhog/Rac1/Gpi1/Vsir/Adipor1/Lsp1/Bst2/Acp5/Abi3/Cd63/Ccl9/Cmtm7/Bin2/Ear2/Prex1/Vim/Myo1f/Trem2/Coro1c/Syk/Cx3cr1/Cd9/Brk1/Igsf8/Elmo2/Sgpl1/Fes/Stk10/Nckap1l/Dock8/Emilin2/Cdh5/Il1b/Gna12/Vasp/Icam1/Akt1/Jup/Rhob…
GO:0007155	GO:0007155	cell adhesion	140/1091	337/3883	1.91471e-08	1.35026e-05	1.17543e-05	Cd74/Sdc3/H2-Aa/Laptm5/Actg1/Lgals3/Tgm2/Axl/Lrp1/Lgals3bp/Ninj1/Rac2/Spi1/Sirpa/Msn/Adgre5/Siglec1/Lgals9/Itgal/H2-Eb1/Flna/Zyx/Itgb5/Dusp1/Fermt3/Coro1a/Arpc2/Itgb2/Gnas/Plxnb2/Siglece/Rac1/Stab2/Vsir/Acp5/Cd63/Dnm2/Prex1/Myo1f/Coro1c/Syk/Tgfbi/Cx3cr1/Cd9/Elmo2/Fes/Stk10/Nckap1l/Dock8/Tln1/Actn1/Emilin2/Cdh5/Il1b/Icam1/Akt1/Jup/Parvg/Rhob/Il4ra/Sh2b3/Tgfbr2/Pxn/Eng/Ptk2b/Rela/Acvrl1/Prkar1a/Tfe…
GO:0051270	GO:0051270	regulation of cellular component movement	131/1091	313/3883	3.41766e-08	2.00845e-05	1.7484e-05	Cd74/Csf1r/Sdc3/Actg1/Lgals3/Grn/Lrp1/Hmox1/Arhgdia/Lamp1/Ninj1/Rac2/Spi1/Aldoa/Msn/Coro1b/Lgals9/Flna/Dusp1/Atp1a1/Fermt3/Coro1a/Arpc2/C5ar1/Plxnb2/Rhog/Rac1/Gpi1/Vsir/Adipor1/Bst2/Acp5/Abi3/Cd63/Vim/Myo1f/Trem2/Coro1c/Cx3cr1/Cd9/Igsf8/Fes/Arap1/Stk10/Nckap1l/Dock8/Actn1/Emilin2/Cdh5/Il1b/Gna12/Icam1/Akt1/Jup/Rhob/Nisch/Slc8b1/Myd88/Tgfbr2/Eng/Ptk2b/Abr/Fgr/Acvrl1/Gpnmb/P2rx4/Mapk1/Map2k2/Akt2/E…
GO:2000145	GO:2000145	regulation of cell motility	123/1091	296/3883	1.54031e-07	7.75878e-05	6.75422e-05	Cd74/Csf1r/Sdc3/Actg1/Lgals3/Grn/Lrp1/Hmox1/Arhgdia/Ninj1/Rac2/Spi1/Aldoa/Msn/Coro1b/Lgals9/Flna/Dusp1/Fermt3/Coro1a/Arpc2/C5ar1/Plxnb2/Rhog/Rac1/Gpi1/Vsir/Adipor1/Bst2/Acp5/Abi3/Cd63/Vim/Myo1f/Trem2/Coro1c/Cx3cr1/Cd9/Igsf8/Fes/Stk10/Nckap1l/Dock8/Emilin2/Cdh5/Il1b/Gna12/Icam1/Akt1/Jup/Rhob/Nisch/Slc8b1/Myd88/Tgfbr2/Eng/Ptk2b/Abr/Fgr/Acvrl1/Gpnmb/P2rx4/Mapk1/Map2k2/Akt2/Emc10/Map2k3/Arhgef2/Cnn2/…
GO:0030029	GO:0030029	actin filament-based process	100/1091	231/3883	2.44296e-07	9.28102e-05	8.07936e-05	Csf1r/Tyrobp/Actg1/Lrp1/Arhgdia/Arpc1b/Cotl1/Rac2/Sirpa/Coro1b/Wdr1/Flna/Zyx/Itgb5/Atp1a1/Cap1/Coro1a/Capg/Arpc2/Csrp1/Rhog/Arf1/Rac1/Hck/Bst2/Arpc3/Myo1f/Marcksl1/Coro1c/Hcls1/Brk1/Elmo2/Fes/Arap1/Ptpn1/Nckap1l/Tln1/Actn1/Vasp/Icam1/Jup/Parvg/Rhob/Nisch/Pxn/Ptk2b/Abr/Ppp1r9b/Fgr/Nuak2/Prkar1a/Ehbp1l1/Dbnl/Gsn/Wasf2/Myo1g/Myo9b/Arhgef2/Cnn2/Prkcd/Tpm4/Myadm/Sh3pxd2b/Actn4/Abl1/Cyfip1/Cttn/Slc9a3r…
GO:0040012	GO:0040012	regulation of locomotion	125/1091	304/3883	2.46042e-07	9.28102e-05	8.07936e-05	Cd74/Csf1r/Sdc3/Actg1/Lgals3/Grn/Lrp1/Hmox1/Arhgdia/Ninj1/Rac2/Spi1/Aldoa/Msn/Coro1b/Lgals9/Flna/Dusp1/Fermt3/Coro1a/Arpc2/C5ar1/Plxnb2/Rhog/Rac1/Gpi1/Vsir/Adipor1/Bst2/Acp5/Abi3/Cd63/Vim/Myo1f/Trem2/Coro1c/Cx3cr1/Cd9/Igsf8/Fes/Stk10/Nckap1l/Dock8/Emilin2/Cdh5/Il1b/Gna12/Icam1/Akt1/Jup/Rhob/Nisch/Slc8b1/Myd88/Tgfbr2/Eng/Ptk2b/Abr/Fgr/Acvrl1/Gpnmb/P2rx4/Mapk1/Map2k2/Akt2/Emc10/Map2k3/Arhgef2/Cnn2/…
GO:0045595	GO:0045595	regulation of cell differentiation	157/1091	401/3883	2.81647e-07	9.28102e-05	8.07936e-05	Cd74/Csf1r/C1qc/H2-Aa/Tyrobp/Grn/Tgm2/Axl/Lrp1/Ninj1/Spi1/Wdr1/Lgals9/Flna/Id3/Ybx1/Dmpk/Eif5a/Arpc2/Gnas/Plxnb2/Nfam1/Prelid1/Nfkbia/Rac1/Slc6a6/Anxa2/Vsir/Adipor1/Btg1/Ccl9/Dnm2/Prex1/Vim/G6pdx/Trem2/Coro1c/Clptm1/Syk/Cx3cr1/Por/Hcls1/Tnfrsf1b/Fes/Tnfrsf1a/Slc45a3/Nckap1l/Timp2/Cdh5/Il1b/Ptbp1/Junb/Fos/Akt1/Cebpa/Zbtb7a/Il4ra/Sh2b3/Arrb2/Tgfbr2/Eng/Ptk2b/Rela/Acvrl1/Tfe3/Ccnd1/Ap3d1/Eif4g1/Dbnl…
GO:0007167	GO:0007167	enzyme linked receptor protein signaling pathway	100/1091	232/3883	3.15088e-07	9.28102e-05	8.07936e-05	Csf1r/Axl/Lrp1/Hexa/Spi1/Lgals9/Zyx/Itgb5/Ybx1/Dok2/Rac1/Stat6/Vsir/Adipor1/Hck/Cd63/Dnm2/Nrros/Vim/Mapkapk2/Syk/Ccnd3/Sgpl1/Fes/Ptpn1/Cdh5/Il1b/Fos/Akt1/Zbtb7a/Sh2b3/Myd88/Arrb2/Tgfbr2/Pxn/Cdk4/Eng/Ptk2b/Rela/Fgr/Acvrl1/Fkbp8/Mapk1/Akt2/Hgs/Xdh/Pik3cd/Mvp/Prkcd/Srebf1/Rapgef1/Blnk/Flcn/Eif4ebp2/Dok3/Abl1/Cyfip1/Pml/Slc9a3r1/Fam20c/Sorl1/Mapk3/Myo1c/Ndel1/Insr/Rhbdf2/Numa1/Sirt2/Dcn/Dok1/Stat5b/P…
GO:0007010	GO:0007010	cytoskeleton organization	139/1091	347/3883	3.1586e-07	9.28102e-05	8.07936e-05	Csf1r/Tyrobp/Actg1/Tuba1b/Gapdh/Lrp1/Arhgdia/Arpc1b/Cotl1/Rac2/Sirpa/Coro1b/Wdr1/Flna/Zyx/Itgb5/Cap1/Coro1a/Capg/Arpc2/Csrp1/Rhog/Arf1/Rac1/Lsp1/Hck/Bst2/Tuba1c/Arpc3/Vim/Myo1f/Marcksl1/Coro1c/Hcls1/Tubb6/Brk1/Elmo2/Fes/Arap1/Ptpn1/Nckap1l/Tln1/Actn1/Map7d1/Cdh5/Vasp/Icam1/Akt1/Parvg/Rhob/Ppp2r1a/Fgd2/Tubb4b/Nisch/Cln8/Pxn/Dync1h1/Ptk2b/Abr/Ppp1r9b/Fgr/Nuak2/Tubb2a/Dctn1/Prkar1a/Ehbp1l1/Dbnl/Gsn/…
GO:0022603	GO:0022603	regulation of anatomical structure morphogenesis	113/1091	271/3883	4.21103e-07	0.000106058	9.2326e-05	Csf1r/Lgals3/Grn/Pkm/Lrp1/Hmox1/Arhgdia/Ninj1/Rac2/Aldoa/Msn/Coro1b/Wdr1/Flna/Coro1a/Arpc2/Itgb2/C5ar1/Plxnb2/Rhog/Myl12b/Rac1/Btg1/Hck/Rxra/Dnm2/Prex1/Vim/Coro1c/Cx3cr1/Fes/Tnfrsf1a/Arap1/Emilin2/Cdh5/Il1b/Klf2/Gna12/Icam1/Jup/Rhob/Sh2b3/Tgfbr2/Pxn/Eng/Ptk2b/Abr/Fgr/Acvrl1/Dbnl/Etv5/Mydgf/Map2k2/Emc10/Hgs/Cdc42se1/Pik3cd/Lfng/Vat1/Myadm/Phb2/Actn4/Epn1/Sars/Itgax/Plxna1/Flcn/Abl1/Mff/Cyfip1/Pml/…
GO:0051094	GO:0051094	positive regulation of developmental process	139/1091	352/3883	8.51063e-07	0.000197077	0.000171561	Cd74/Csf1r/H2-Aa/Tyrobp/Lgals3/Grn/Tgm2/Axl/Pkm/Lrp1/Hmox1/Ninj1/Adgre5/Coro1b/Lgals9/Flna/Eif5a/Arpc2/Itgb2/C5ar1/Gnas/Plxnb2/Arf1/Rac1/Slc6a6/Stat6/Vsir/Btg1/Dnm2/Prex1/Ehd1/Vim/Trem2/Coro1c/Syk/Cx3cr1/Por/Hcls1/Tnfrsf1b/Fes/Tnfrsf1a/Nckap1l/Timp2/Itsn1/Emilin2/Cdh5/Il1b/Junb/Fos/Akt1/Jup/Rhob/Cebpa/Il4ra/Arrb2/Tgfbr2/Pxn/Eng/Ptk2b/Rela/Acvrl1/Tfe3/Ccnd1/Ap3d1/Eif4g1/Dbnl/Etv5/Irf1/Zfp36/Mydgf/…
GO:0030036	GO:0030036	actin cytoskeleton organization	93/1091	216/3883	8.9428e-07	0.000197077	0.000171561	Csf1r/Tyrobp/Actg1/Lrp1/Arhgdia/Arpc1b/Cotl1/Rac2/Sirpa/Coro1b/Wdr1/Flna/Zyx/Itgb5/Cap1/Coro1a/Capg/Arpc2/Csrp1/Rhog/Arf1/Rac1/Hck/Bst2/Arpc3/Myo1f/Marcksl1/Coro1c/Hcls1/Brk1/Elmo2/Fes/Arap1/Ptpn1/Nckap1l/Tln1/Actn1/Vasp/Icam1/Parvg/Rhob/Nisch/Pxn/Ptk2b/Abr/Ppp1r9b/Fgr/Nuak2/Prkar1a/Ehbp1l1/Dbnl/Gsn/Wasf2/Myo1g/Arhgef2/Cnn2/Prkcd/Tpm4/Myadm/Sh3pxd2b/Actn4/Abl1/Cyfip1/Cttn/Slc9a3r1/Asb2/Rhoc/Myo1c…
GO:0042127	GO:0042127	regulation of cell population proliferation	167/1091	440/3883	1.2233e-06	0.000253727	0.000220876	Cd74/Csf1r/H2-Aa/Tyrobp/Laptm5/Fth1/Lgals3/Grn/Hmox1/Rac2/Lgals9/Itgal/Flna/Dusp1/Ybx1/Coro1a/Gnas/Grk2/Nfkbia/Csf2rb/Anxa2/Stat6/Vsir/Btg1/Hck/Ctsz/Rxra/Vim/Marcksl1/Trem2/Rnf187/Syk/Cx3cr1/Por/Hcls1/Cd9/Ccnd3/Slfn2/Tnfrsf1b/Bcl2l1/Brk1/Ptgs1/Apobec1/Fes/Nckap1l/Fcgr2b/Timp2/Ccnd2/Cdh5/Il1b/Gna12/Junb/Akt1/Jup/Cebpa/Csf2ra/Il4ra/Sh2b3/Btg2/Myd88/Csk/Cdkn1a/Tgfbr2/Cdk4/Eng/Ptk2b/Rela/Ppp1r9b/Acvr…
GO:0007186	GO:0007186	G protein-coupled receptor signaling pathway	57/1091	122/3883	6.71793e-06	0.00131597	0.00114558	Psap/Tgm2/Lrp1/Rac2/Adgre5/Adgre1/Flna/C5ar1/Gnas/Rgs1/Grk2/Rac1/Gnb2/Ccl9/Dgkz/Dnm2/Prex1/Syk/Cx3cr1/Adcy4/Mgrn1/Gna12/Akt1/Arrb2/Daglb/Ptk2b/Rela/Ppp1r9b/Gprc5c/Adcy7/Gpr35/Cmklr1/Gde1/P2ry6/Slc9a3r1/Ptafr/Sorl1/Arhgef1/Pik3r5/Tpra1/Grk6/Insr/Ywhab/Zdhhc7/Ccr2/Adcy3/Crtc3/Gipc1/Gpr182/Arrb1/Stmn1/S1pr2/Sort1/Ric8a/Ccr7/Adrb1/Agtrap
GO:0030155	GO:0030155	regulation of cell adhesion	97/1091	237/3883	7.81703e-06	0.00145068	0.00126285	Cd74/H2-Aa/Laptm5/Actg1/Lgals3/Tgm2/Lrp1/Ninj1/Rac2/Spi1/Sirpa/Lgals9/Itgal/H2-Eb1/Flna/Dusp1/Fermt3/Coro1a/Arpc2/Itgb2/Plxnb2/Rac1/Vsir/Acp5/Cd63/Dnm2/Prex1/Myo1f/Coro1c/Syk/Cd9/Fes/Nckap1l/Dock8/Emilin2/Il1b/Icam1/Akt1/Jup/Il4ra/Sh2b3/Tgfbr2/Ptk2b/Rela/Acvrl1/Prkar1a/Tfe3/Ap3d1/Gpnmb/Gsn/Irf1/Akna/Sash3/Il6ra/Lgals1/H2-DMb1/Prkcd/Myadm/Actn4/Cebpb/Plxna1/Rin2/Flcn/Ccdc88b/Abl1/Pml/Tnfrsf21/Ptaf…
GO:0045597	GO:0045597	positive regulation of cell differentiation	100/1091	247/3883	9.84617e-06	0.0017305	0.00150645	Cd74/Csf1r/H2-Aa/Tyrobp/Tgm2/Axl/Lrp1/Ninj1/Lgals9/Flna/Eif5a/Arpc2/Gnas/Plxnb2/Rac1/Slc6a6/Vsir/Btg1/Dnm2/Prex1/Vim/Trem2/Syk/Cx3cr1/Por/Hcls1/Tnfrsf1b/Fes/Nckap1l/Timp2/Cdh5/Il1b/Junb/Fos/Akt1/Cebpa/Il4ra/Arrb2/Tgfbr2/Eng/Rela/Acvrl1/Tfe3/Ap3d1/Eif4g1/Dbnl/Etv5/Irf1/Zfp36/Map2k2/Lrp5/Bag1/Sash3/Arhgef2/Pa2g4/Myadm/Sh3pxd2b/Cebpb/Plxna1/Rin2/Cmklr1/Metrnl/Abl1/Cyfip1/Fam20c/Csnk1d/Twf2/Ndel1/Num…
GO:2000026	GO:2000026	regulation of multicellular organismal development	141/1091	372/3883	1.03065e-05	0.0017305	0.00150645	Cd74/Csf1r/C1qc/H2-Aa/Tyrobp/Lgals3/Grn/Tgm2/Axl/Pkm/Lrp1/Hmox1/Ninj1/Spi1/Adgre5/Lgals9/Itgb2/C5ar1/Gnas/Plxnb2/Nfam1/Prelid1/Nfkbia/Anxa2/Vsir/Btg1/Rxra/Vim/G6pdx/Trem2/Clptm1/Syk/Cx3cr1/Por/Hcls1/Tnfrsf1b/Fes/Tnfrsf1a/Nckap1l/Emilin2/Cdh5/Il1b/Klf2/Fos/Akt1/Jup/Rhob/Zbtb7a/Il4ra/Sh2b3/Tgfbr2/Pxn/Eng/Ptk2b/Rela/Acvrl1/Tfe3/Ccnd1/Ap3d1/Dbnl/Etv5/Irf1/Zfp36/Mydgf/Mapk1/Map2k2/Mafb/Emc10/Bag1/Sash…
GO:1903305	GO:1903305	regulation of regulated secretory pathway	27/1091	46/3883	1.21857e-05	0.00195304	0.00170017	Hmox1/Lamp1/Rac2/Spi1/Lgals9/Itgb2/Arf1/Syk/Bcl2l1/Cyth1/Fes/Nckap1l/Il4ra/Abr/Fgr/Rims3/Ptafr/Ccr2/Gipc1/Itgam/Sphk2/Stxbp2/Notch1/Gab2/Fbxl20/Dtnbp1/Scamp5
GO:0002263	GO:0002263	cell activation involved in immune response	48/1091	100/3883	1.4742e-05	0.00211734	0.0018432	Cd74/Tyrobp/Lgals3/Grn/Lrp1/Hmox1/Slc11a1/Lamp1/Rac2/Spi1/Lgals9/Itgal/Coro1a/Itgb2/Stat6/Irf8/Myo1f/Trem2/Syk/Cx3cr1/Fes/Nckap1l/Icam1/Il4ra/Myd88/Ptk2b/Abr/Fgr/Irf1/Il6ra/Lgals1/Lfng/H2-DMb1/Sbno2/Abl1/Ptafr/Ccr2/Gbf1/Trp53/Relb/Ccr7/Zbtb7b/Itgam/Sphk2/Stxbp2/Gab2/Apbb1ip/Lat2
GO:0043300	GO:0043300	regulation of leukocyte degranulation	18/1091	26/3883	1.47486e-05	0.00211734	0.0018432	Hmox1/Lamp1/Rac2/Spi1/Lgals9/Itgb2/Syk/Fes/Nckap1l/Il4ra/Abr/Fgr/Ptafr/Ccr2/Itgam/Sphk2/Stxbp2/Gab2
GO:0050865	GO:0050865	regulation of cell activation	81/1091	194/3883	1.91792e-05	0.002601	0.00226423	Cd74/H2-Aa/Tyrobp/Laptm5/Lgals3/Grn/Axl/Hmox1/Lamp1/Rac2/Spi1/Sirpa/Lgals9/Itgal/H2-Eb1/Coro1a/Itgb2/Nfam1/Prelid1/Themis2/Stat6/Vsir/Trem2/Clptm1/Syk/Cd9/Tnfrsf1b/Fes/Nckap1l/Dock8/Fcgr2b/Emilin2/Il1b/Rps6ka1/Cebpa/Il4ra/Sh2b3/Myd88/Csk/Cdkn1a/Tgfbr2/Abr/Fgr/Prkar1a/Ap3d1/Gpnmb/Irf1/Sash3/Il6ra/Lgals1/H2-DMb1/Prkcd/Cebpb/Ccdc88b/Abl1/Tnfrsf21/Ptafr/Tnfaip8l2/Il16/Ccr2/Stat5b/Pkn1/Mmp14/Btk/Zfp36…
GO:0070661	GO:0070661	leukocyte proliferation	56/1091	124/3883	2.81701e-05	0.00361047	0.00314301	Cd74/Csf1r/H2-Aa/Tyrobp/Laptm5/Lgals3/Slc11a1/Rac2/Msn/Lgals9/Itgal/Coro1a/Itgb2/Csf2rb/Vsir/Trem2/Syk/Ccnd3/Tnfrsf1b/Nckap1l/Dock8/Fcgr2b/Il1b/Csf2ra/Myd88/Cdkn1a/Tgfbr2/Prkar1a/Csf2rb2/Gpnmb/Irf1/Mapk1/Sash3/Ncstn/H2-DMb1/Prkcd/Cebpb/Ccdc88b/Abl1/Tnfrsf21/Mapk3/Impdh1/Ccr2/Stat5b/Elf4/Pkn1/Trp53/Btk/Bap1/Tyk2/Ccr7/Tcf3/Zbtb7b/Itgam/Cd209a/Cd151
GO:0071417	GO:0071417	cellular response to organonitrogen compound	78/1091	187/3883	2.86708e-05	0.00361047	0.00314301	Tgm2/Pkm/Lrp1/Flna/Ybx1/Arpc2/Gnas/Grk2/Rac1/Stat6/Adipor1/Dnm2/Vim/Trem2/Ccnd3/Bcl2l1/Ptpn1/Fcgr2b/Il1b/Icam1/Akt1/Jup/Csk/Pxn/Cdk4/Rela/Ppp1r9b/Irf1/P2rx4/Mapk1/Akt2/Ywhag/Bag1/Slc25a33/Arhgef2/Ncstn/Prkcd/Srebf1/Usf1/Cebpb/Rapgef1/Eif4ebp2/P2ry6/Cyfip1/Slc9a3r1/Sorl1/Mapk3/Myo1c/Ndel1/Insr/Zdhhc7/Sirt2/Stat5b/Selenon/Mars1/Trp53/Sesn2/Rangap1/Zfp36l1/Tyk2/Jun/Zbtb7b/Nr4a1/Capn2/Inppl1/Parp1/Ag…
GO:0009888	GO:0009888	tissue development	153/1091	417/3883	3.33149e-05	0.00391561	0.00340864	Psap/Ly6e/Actg1/Tgm2/Spi1/Msn/Wdr1/Flna/Dusp1/Id3/Ybx1/Gnas/Csrp1/Plxnb2/Rac1/Plod1/Gpi1/Stat6/Adipor1/Btg1/Txnrd1/Cd63/Ctsz/Rxra/Vim/Tagln2/G6pdx/Coro1c/Por/Ptgs1/Tnfrsf1a/Trpc4ap/Cdh5/Il1b/Klf2/Gaa/Vasp/Icam1/Junb/Fos/Akt1/Rhob/Zbtb7a/Btg2/Myd88/Arrb2/Tgfbr2/Pxn/Cdk4/Eng/Ptk2b/Rela/Fgr/Acvrl1/Prkar1a/Ccnd1/Fkbp8/Mcrip1/Etv5/Zfp36/Mapk1/Map2k2/Mafb/Akna/Lrp5/Il6ra/Xdh/Keap1/Pik3cd/Lfng/Plod3/Fzr…
GO:0002694	GO:0002694	regulation of leukocyte activation	76/1091	182/3883	3.47304e-05	0.00395031	0.00343884	Cd74/H2-Aa/Tyrobp/Laptm5/Lgals3/Grn/Axl/Hmox1/Lamp1/Rac2/Spi1/Sirpa/Lgals9/Itgal/H2-Eb1/Coro1a/Itgb2/Nfam1/Prelid1/Themis2/Stat6/Vsir/Trem2/Clptm1/Syk/Tnfrsf1b/Fes/Nckap1l/Dock8/Fcgr2b/Il1b/Cebpa/Il4ra/Sh2b3/Myd88/Csk/Cdkn1a/Tgfbr2/Abr/Fgr/Prkar1a/Ap3d1/Gpnmb/Irf1/Sash3/Lgals1/H2-DMb1/Cebpb/Ccdc88b/Abl1/Tnfrsf21/Ptafr/Tnfaip8l2/Il16/Ccr2/Stat5b/Pkn1/Mmp14/Btk/Zfp36l1/Flot2/Tyk2/Ccr7/Tcf3/Zbtb7b/Z…
GO:0043299	GO:0043299	leukocyte degranulation	21/1091	34/3883	3.99738e-05	0.00440461	0.00383433	Hmox1/Lamp1/Rac2/Spi1/Lgals9/Coro1a/Itgb2/Myo1f/Syk/Fes/Nckap1l/Il4ra/Abr/Fgr/Ptafr/Ccr2/Itgam/Sphk2/Stxbp2/Gab2/Lat2
GO:0006897	GO:0006897	endocytosis	84/1091	207/3883	4.75073e-05	0.00492679	0.0042889	Actg1/Lgals3/Grn/Axl/Lrp1/Rac2/Sirpa/Siglec1/Scarb1/Cap1/Itgb2/Treml4/Grk2/Rhog/Siglece/Arf1/Rac1/Anxa2/Stab2/Fcgr1/Cd63/Bin2/Dnm2/Ehd1/Trem2/Mapkapk2/Syk/Rnasek/Cd9/Rab5c/Bcl2l1/Il10ra/Ptpn1/Nckap1l/Fcgr2b/Itsn1/Ehd3/Arrb2/Tgfbr2/Dbnl/Gsn/Mapk1/Wasf2/Necap2/Lrp5/Pip5k1c/Rin3/Actn4/Epn1/Arhgap27/Rin2/Marchf2/Abl1/Nr1h2/Cttn/Sorl1/Mapk3/Fnbp1/Rab5b/Insr/Ap2b1/Ldlrap1/Sirt2/Add1/Arrb1/Sort1/Ccr7/Tb…
GO:0001775	GO:0001775	cell activation	133/1091	357/3883	5.0728e-05	0.00511048	0.0044488	Cd74/Psap/C1qa/H2-Aa/Tyrobp/Laptm5/Lgals3/Grn/Axl/Lrp1/Hmox1/Slc11a1/Lamp1/Rac2/Spi1/Sirpa/Msn/Lgals9/Itgal/H2-Eb1/Fermt3/Coro1a/Itgb2/C5ar1/Gnas/Nfam1/Prelid1/Themis2/Stat6/Vsir/Cmtm7/Irf8/Prex1/Myo1f/Trem2/Clptm1/Pirb/Syk/Cx3cr1/Cd9/Ccnd3/Tnfrsf1b/Clec4a3/Fes/Nckap1l/Dock8/Fcgr2b/Emilin2/Il1b/Rps6ka1/Icam1/Cebpa/Zbtb7a/Il4ra/Ifngr2/Sh2b3/Myd88/Csk/Cdkn1a/Ltbr/Tgfbr2/Wdfy4/Ptk2b/Abr/Fgr/Acvrl1/P…
GO:0007264	GO:0007264	small GTPase mediated signal transduction	60/1091	138/3883	5.89882e-05	0.00544906	0.00474355	Hmox1/Arhgdia/Rac2/Rgl1/Cyth4/Dok2/Rhog/Rac1/Dgkz/Dnm2/Nucb1/Brk1/Cyth1/Rasgef1b/Dock8/Timp2/Itsn1/Gna12/Kctd10/Nkiras2/Rhob/Nisch/Arhgap19/Vav2/Dbnl/Arhgap1/Wasf2/Myo9b/Arhgef2/Cdc42se1/Rasa3/Gpr35/Rapgef1/Flcn/Dok3/Abl1/Cyfip1/Rhoc/Dennd4b/Sipa1/Dok1/Tax1bp3/Was/Arrb1/Stmn1/Map2k1/Rap2a/Jun/Nup62/Rras/Adrb1/Cdc42se2/Notch1/Camk2d/Ralbp1/Rhobtb1/Ulk1/Psd4/Aatk/Mapkap1
GO:0072359	GO:0072359	circulatory system development	114/1091	299/3883	5.90023e-05	0.00544906	0.00474355	Ly6e/Actg1/Lgals3/Grn/Pkm/Lrp1/Hmox1/Ninj1/Spi1/Flna/Id3/Tnfaip2/Itgb2/C5ar1/Grk2/Rac1/Anxa2/Btg1/Rxra/Dnm2/G6pdx/Syk/Cx3cr1/Tnfrsf1b/Sgpl1/Tnfrsf1a/Emilin2/Cdh5/Il1b/Klf2/Gaa/Kctd10/Junb/Akt1/Jup/Rhob/Sh2b3/Cdkn1a/Arrb2/Tgfbr2/Pxn/Ap1b1/Eng/Ptk2b/Acvrl1/Prkar1a/Hs6st1/Vav2/Mydgf/Mapk1/Map2k2/Wasf2/Lrp5/Emc10/Hgs/Il6ra/Xdh/Pik3cd/Sh3pxd2b/Epn1/Sars/Itgax/Rapgef1/Rin2/Flcn/Abl1/Pml/Asb2/Mapk3/Map3…
GO:0071363	GO:0071363	cellular response to growth factor stimulus	69/1091	164/3883	6.02704e-05	0.00544906	0.00474355	Lrp1/Spi1/Coro1b/Zyx/Itgb5/Coro1a/Arpc2/Grk2/Vsir/Cd63/Dnm2/Nrros/Ehd1/Mapkapk2/Ptpn1/Cdh5/Fos/Akt1/Zbtb7a/Arrb2/Tgfbr2/Pxn/Eng/Rela/Acvrl1/Fkbp8/Zfp36/Map2k3/Hgs/Xdh/Pik3cd/Rapgef1/Flcn/Abl1/Cyfip1/Pml/Fam20c/Sorl1/Mapk3/Myo1c/Twf2/Insr/Numa1/Sirt2/Dcn/Stat5b/Ptp4a3/Id1/Mars1/Trp53/Hipk2/Stk11/Gipc1/Zfp36l1/Sort1/Jun/Ndst1/Zmiz1/Nr4a1/Mapk7/Parp1/Notch1/Nfkb1/Hyal2/Shc1/Ptpn11/Ulk1/Ext2/Ski
GO:0045321	GO:0045321	leukocyte activation	121/1091	323/3883	8.64441e-05	0.00743419	0.00647166	Cd74/Psap/C1qa/H2-Aa/Tyrobp/Laptm5/Lgals3/Grn/Axl/Hmox1/Slc11a1/Lamp1/Rac2/Spi1/Sirpa/Msn/Lgals9/Itgal/H2-Eb1/Coro1a/Itgb2/C5ar1/Nfam1/Prelid1/Themis2/Stat6/Vsir/Cmtm7/Irf8/Prex1/Myo1f/Trem2/Clptm1/Pirb/Syk/Cx3cr1/Ccnd3/Tnfrsf1b/Clec4a3/Fes/Nckap1l/Dock8/Fcgr2b/Il1b/Icam1/Cebpa/Zbtb7a/Il4ra/Ifngr2/Sh2b3/Myd88/Csk/Cdkn1a/Ltbr/Tgfbr2/Wdfy4/Ptk2b/Abr/Fgr/Prkar1a/Ap3d1/Gpnmb/Gsn/Irf1/Slamf9/Mafb/Sash…
GO:0070848	GO:0070848	response to growth factor	70/1091	170/3883	0.000120572	0.00988693	0.00860683	Lrp1/Spi1/Coro1b/Zyx/Itgb5/Coro1a/Arpc2/Grk2/Vsir/Cd63/Dnm2/Nrros/Ehd1/Mapkapk2/Ptpn1/Cdh5/Fos/Akt1/Zbtb7a/Arrb2/Tgfbr2/Pxn/Eng/Rela/Acvrl1/Fkbp8/Zfp36/Mapk1/Map2k3/Hgs/Xdh/Pik3cd/Rapgef1/Flcn/Abl1/Cyfip1/Pml/Fam20c/Sorl1/Mapk3/Myo1c/Twf2/Insr/Numa1/Sirt2/Dcn/Stat5b/Ptp4a3/Id1/Mars1/Trp53/Hipk2/Stk11/Gipc1/Zfp36l1/Sort1/Jun/Ndst1/Zmiz1/Nr4a1/Mapk7/Parp1/Notch1/Nfkb1/Hyal2/Shc1/Ptpn11/Ulk1/Ext2/Ski
GO:1901699	GO:1901699	cellular response to nitrogen compound	83/1091	209/3883	0.000129364	0.0103668	0.00902455	Ly6e/Tgm2/Pkm/Lrp1/Flna/Ybx1/Arpc2/Gnas/Grk2/Rac1/Stat6/Adipor1/Dnm2/Vim/Trem2/Ccnd3/Bcl2l1/Ptpn1/Fcgr2b/Il1b/Icam1/Akt1/Jup/Csk/Pxn/Cdk4/Rela/Ppp1r9b/Irf1/P2rx4/Mapk1/Akt2/Ywhag/Bag1/Slc25a33/Rtf2/Arhgef2/Ncstn/Prkcd/Srebf1/Usf1/Cebpb/Rapgef1/Eif4ebp2/P2ry6/Cyfip1/Slc9a3r1/Sorl1/Mapk3/Myo1c/Ndel1/Insr/Zdhhc7/Sirt2/Stat5b/Selenon/Ly6c2/Mars1/Trp53/Sesn2/Rangap1/Zfp36l1/Tyk2/Jun/Zbtb7b/Nr4a1/Capn2…
GO:0048646	GO:0048646	anatomical structure formation involved in morphogenesis	111/1091	296/3883	0.000164786	0.0123603	0.01076	Psap/Tyrobp/Actg1/Lgals3/Grn/Tgm2/Pkm/Hmox1/Ninj1/Wdr1/Flna/Dusp1/Tnfaip2/Itgb2/C5ar1/Gnas/Csrp1/Plxnb2/Anxa2/Gpi1/Btg1/Txnrd1/Rxra/Ehd1/Trem2/Syk/Cx3cr1/Cd9/Tnfrsf1a/Actn1/Emilin2/Cdh5/Il1b/Klf2/Vasp/Kctd10/Junb/Akt1/Jup/Rhob/Il4ra/Sh2b3/Tgfbr2/Pxn/Eng/Ptk2b/Acvrl1/Prkar1a/Tifab/Hs6st1/Vav2/Mydgf/Mapk1/Map2k2/Mafb/Wasf2/Emc10/Hgs/Pik3cd/Lfng/Sbno2/Epn1/Sars/Itgax/Flcn/Abl1/Pml/Fam20c/Mapk3/Rpl7l…
GO:0046651	GO:0046651	lymphocyte proliferation	48/1091	108/3883	0.000169976	0.0123603	0.01076	Cd74/H2-Aa/Tyrobp/Laptm5/Lgals3/Slc11a1/Rac2/Msn/Lgals9/Itgal/Coro1a/Itgb2/Vsir/Syk/Ccnd3/Tnfrsf1b/Nckap1l/Dock8/Fcgr2b/Il1b/Myd88/Cdkn1a/Tgfbr2/Prkar1a/Gpnmb/Irf1/Sash3/Ncstn/H2-DMb1/Prkcd/Cebpb/Ccdc88b/Abl1/Tnfrsf21/Impdh1/Ccr2/Stat5b/Elf4/Pkn1/Trp53/Btk/Tyk2/Ccr7/Tcf3/Zbtb7b/Itgam/Cd209a/Cd151
GO:0071495	GO:0071495	cellular response to endogenous stimulus	125/1091	340/3883	0.000171768	0.0123603	0.01076	Tgm2/Pkm/Lrp1/Spi1/Coro1b/Flna/Zyx/Itgb5/Atp1a1/Ybx1/Coro1a/Arpc2/Gnas/Grk2/Rac1/Stat6/Vsir/Adipor1/Rxra/Dnm2/Wbp2/Nrros/Ehd1/Vim/Trem2/Ccnd3/Bcl2l1/Ptpn1/Fcgr2b/Cdh5/Il1b/Icam1/Fos/Akt1/Jup/Zbtb7a/Csk/Arrb2/Tgfbr2/Pxn/Cdk4/Eng/Rela/Ppp1r9b/Acvrl1/Fkbp8/Irf1/Zfp36/P2rx4/Mapk1/Akt2/Ywhag/Bag1/Slc25a33/Arhgef2/Ncstn/Prkcd/Srebf1/Usf1/Phb2/Cebpb/Rapgef1/Flcn/Eif4ebp2/Abl1/P2ry6/Cyfip1/Pml/Slc9a3r1/F…
GO:0032970	GO:0032970	regulation of actin filament-based process	58/1091	137/3883	0.000190713	0.0131854	0.0114782	Csf1r/Actg1/Lrp1/Arhgdia/Arpc1b/Cotl1/Rac2/Coro1b/Wdr1/Flna/Atp1a1/Coro1a/Capg/Arpc2/Rhog/Arf1/Rac1/Hck/Bst2/Arpc3/Myo1f/Hcls1/Brk1/Fes/Arap1/Nckap1l/Vasp/Icam1/Jup/Rhob/Pxn/Ptk2b/Fgr/Dbnl/Gsn/Wasf2/Cnn2/Prkcd/Myadm/Sh3pxd2b/Abl1/Cyfip1/Cttn/Rhoc/Myo1c/Twf2/Id1/Add1/Was/Fhod1/Flii/Stmn1/Trim27/Adrb1/Vill/Rhobtb1/Arpc1a/Pik3r2
GO:0002886	GO:0002886	regulation of myeloid leukocyte mediated immunity	19/1091	32/3883	0.000198655	0.0134703	0.0117263	Tyrobp/Hmox1/Rac2/Spi1/Itgb2/Fcgr1/Syk/Cx3cr1/Fes/Il4ra/Abr/Fgr/Ptafr/Ccr2/Itgam/Sphk2/Mavs/Stxbp2/Gab2
GO:0032956	GO:0032956	regulation of actin cytoskeleton organization	54/1091	126/3883	0.00021694	0.0144326	0.012564	Csf1r/Actg1/Lrp1/Arhgdia/Arpc1b/Cotl1/Rac2/Coro1b/Wdr1/Flna/Coro1a/Capg/Arpc2/Rhog/Arf1/Rac1/Hck/Bst2/Arpc3/Myo1f/Hcls1/Brk1/Fes/Arap1/Nckap1l/Vasp/Icam1/Rhob/Pxn/Ptk2b/Fgr/Dbnl/Gsn/Wasf2/Prkcd/Myadm/Sh3pxd2b/Abl1/Cyfip1/Cttn/Rhoc/Myo1c/Twf2/Id1/Add1/Was/Fhod1/Flii/Stmn1/Trim27/Vill/Rhobtb1/Arpc1a/Pik3r2
GO:0048534	GO:0048534	hematopoietic or lymphoid organ development	112/1091	303/3883	0.000299828	0.0185473	0.0161459	Cd74/Csf1r/Psap/C1qc/H2-Aa/Tyrobp/Laptm5/Axl/Ninj1/Spi1/Sirpa/Wdr1/Lgals9/Gnas/Nfam1/Prelid1/Nfkbia/Stat6/Vsir/Dnase2a/Cmtm7/Irf8/Nrros/Prex1/G6pdx/Trem2/Clptm1/Pirb/Syk/Hcls1/Sgpl1/Fes/Nckap1l/Actn1/Il1b/Klf2/Junb/Fos/Cebpa/Zbtb7a/Il4ra/Sh2b3/Ltbr/Tgfbr2/Ptk2b/Tfe3/Ap3d1/Irf1/Zfp36/Slamf9/Mapk1/Map2k2/Mafb/Wasf2/Lrp5/Sash3/Il6ra/Cnn2/Lgals1/Lfng/Sbno2/Csf3r/Cebpb/Fasn/Flcn/Abl1/Pml/Fam20c/Mapk3/…
GO:0051125	GO:0051125	regulation of actin nucleation	9/1091	11/3883	0.000328805	0.0195378	0.0170081	Coro1b/Coro1a/Arf1/Brk1/Gsn/Wasf2/Cyfip1/Was/Trim27
GO:0051156	GO:0051156	glucose 6-phosphate metabolic process	9/1091	11/3883	0.000328805	0.0195378	0.0170081	Taldo1/Tkt/Gpi1/Pgd/Hk3/G6pdx/Pgls/Trp53/H6pd
GO:0097435	GO:0097435	supramolecular fiber organization	81/1091	208/3883	0.000332463	0.0195378	0.0170081	Actg1/Arpc1b/Cotl1/Rac2/Sirpa/Coro1b/Wdr1/Flna/Zyx/Itgb5/Coro1a/Capg/Arpc2/Csrp1/Rhog/Arf1/Rac1/Anxa2/Arpc3/Vim/Myo1f/Marcksl1/Trem2/Coro1c/Hcls1/Brk1/Elmo2/Fes/Arap1/Nckap1l/Actn1/Cdh5/Vasp/Icam1/Rhob/Pxn/Dync1h1/Ptk2b/Ppp1r9b/Dctn1/Prkar1a/Dbnl/Gsn/Wasf2/Myo1g/Arhgef2/Plod3/Prkcd/Tpm4/Myadm/Sh3pxd2b/Actn4/Ccdc88b/Abl1/Cyfip1/Cttn/Csnk1d/Rhoc/Myo1c/Twf2/Ndel1/Map1s/Numa1/Id1/Add1/Was/Fhod1/Arrb1…
GO:0002696	GO:0002696	positive regulation of leukocyte activation	48/1091	111/3883	0.000375091	0.0209932	0.0182751	Cd74/H2-Aa/Tyrobp/Axl/Lamp1/Sirpa/Lgals9/Itgal/H2-Eb1/Coro1a/Itgb2/Stat6/Vsir/Trem2/Syk/Nckap1l/Dock8/Il1b/Cebpa/Il4ra/Myd88/Cdkn1a/Tgfbr2/Fgr/Ap3d1/Irf1/Sash3/Lgals1/H2-DMb1/Ccdc88b/Ptafr/Il16/Ccr2/Stat5b/Mmp14/Flot2/Tyk2/Ccr7/Tcf3/Zbtb7b/Zmiz1/Itgam/Crlf2/Sphk2/Stxbp2/Gab2/Sirpb1b/Sirpb1c
GO:1902107	GO:1902107	positive regulation of leukocyte differentiation	29/1091	59/3883	0.000444462	0.023657	0.020594	Cd74/Csf1r/H2-Aa/Tyrobp/Axl/Ninj1/Lgals9/Gnas/Vsir/Trem2/Syk/Hcls1/Fes/Nckap1l/Fos/Il4ra/Tgfbr2/Ap3d1/Irf1/Sash3/Ccr2/Stat5b/Mmp14/Zfp36l1/Ccr7/Jun/Zbtb7b/Zmiz1/Itgam
GO:1903708	GO:1903708	positive regulation of hemopoiesis	29/1091	59/3883	0.000444462	0.023657	0.020594	Cd74/Csf1r/H2-Aa/Tyrobp/Axl/Ninj1/Lgals9/Gnas/Vsir/Trem2/Syk/Hcls1/Fes/Nckap1l/Fos/Il4ra/Tgfbr2/Ap3d1/Irf1/Sash3/Ccr2/Stat5b/Mmp14/Zfp36l1/Ccr7/Jun/Zbtb7b/Zmiz1/Itgam
GO:0060326	GO:0060326	cell chemotaxis	47/1091	109/3883	0.000466004	0.023657	0.020594	Cd74/Csf1r/Lgals3/Ninj1/Rac2/Spi1/Coro1b/Dusp1/Coro1a/Itgb2/C5ar1/Rhog/Rac1/Ccl9/Bin2/Prex1/Syk/Cx3cr1/Elmo2/Nckap1l/Il1b/Slc8b1/Arrb2/Eng/Ptk2b/Slamf9/P2rx4/Mapk1/Pf4/Myo9b/Rin3/Prkcd/Csf3r/Gpr35/Cmklr1/Mapk3/Il16/Gpsm3/Ccr2/Gbf1/Spp1/Ccr7/Nr4a1/C1qbp/Itgam/Abcc1/Notch1
GO:0045055	GO:0045055	regulated exocytosis	33/1091	70/3883	0.000485201	0.023657	0.020594	Hmox1/Lamp1/Rac2/Spi1/Lgals9/Coro1a/Itgb2/Arf1/Napa/Myo1f/Syngr2/Syk/Bcl2l1/Cyth1/Rab11b/Fes/Nckap1l/Il4ra/Abr/Fgr/Rims3/Ptafr/Ccr2/Gipc1/Itgam/Sphk2/Stxbp2/Notch1/Gab2/Fbxl20/Dtnbp1/Scamp5/Lat2
GO:0002682	GO:0002682	regulation of immune system process	169/1091	489/3883	0.000492172	0.023657	0.020594	Cd74/H2-D1/Csf1r/C1qa/C1qc/H2-Aa/Cd5l/Cfp/Tyrobp/H2-K1/Laptm5/Lgals3/Grn/Unc93b1/Axl/Hmox1/Slc11a1/Lamp1/Ninj1/Irf7/Rac2/Spi1/Sirpa/Msn/Tmbim6/Lgals9/Itgal/H2-Eb1/Dusp1/Coro1a/Slc15a3/Itgb2/C5ar1/Gnas/Treml4/Nfam1/Prelid1/Rhog/Nfkbia/Rac1/Themis2/Fcgr1/Gpi1/Stat6/Vsir/Dnase2a/Bst2/Dgkz/Tapbp/Myo1f/Trem2/Clptm1/Mapkapk2/Syk/Cx3cr1/Hcls1/Cd9/Tnfrsf1b/Znfx1/Oas3/Fes/Stk10/Nckap1l/Dock8/Fcgr2b/Il1b/T…
GO:0040017	GO:0040017	positive regulation of locomotion	76/1091	195/3883	0.000492428	0.023657	0.020594	Cd74/Csf1r/Actg1/Lgals3/Grn/Lrp1/Hmox1/Rac2/Spi1/Aldoa/Lgals9/Flna/Fermt3/Coro1a/Arpc2/C5ar1/Rac1/Gpi1/Vsir/Acp5/Myo1f/Trem2/Cx3cr1/Nckap1l/Dock8/Cdh5/Il1b/Icam1/Akt1/Rhob/Tgfbr2/Ptk2b/Fgr/Gpnmb/P2rx4/Mapk1/Map2k2/Akt2/Emc10/Map2k3/Arhgef2/Pik3cd/Myadm/Actn4/Itgax/Rin2/Cmklr1/Abl1/P2ry6/Cttn/Ptafr/Mapk3/Il16/Rhoc/Myo1c/Gpsm3/Map3k3/Insr/Ccr2/Trp53/Mmp14/Hdac4/Itga5/Map2k1/Ccr7/Jun/Rras/C1qbp/Abcc…
GO:0006935	GO:0006935	chemotaxis	63/1091	156/3883	0.000496003	0.023657	0.020594	Cd74/Csf1r/Lgals3/Lrp1/Ninj1/Rac2/Spi1/Coro1b/Lgals9/Dusp1/Coro1a/Itgb2/C5ar1/Plxnb2/Rhog/Rac1/Lsp1/Ccl9/Cmtm7/Bin2/Ear2/Prex1/Trem2/Syk/Cx3cr1/Elmo2/Fes/Nckap1l/Il1b/Vasp/Slc8b1/Arrb2/Eng/Ptk2b/Slamf9/P2rx4/Mapk1/Akt2/Pf4/Myo9b/Pip5k1c/Pik3cd/Rin3/Prkcd/Csf3r/Gpr35/Plxna1/Cmklr1/Cyfip1/Cttn/Ptafr/Mapk3/Il16/Gpsm3/Ccr2/Gbf1/Spp1/Ccr7/Nr4a1/C1qbp/Itgam/Abcc1/Notch1
GO:0050867	GO:0050867	positive regulation of cell activation	49/1091	115/3883	0.000496488	0.023657	0.020594	Cd74/H2-Aa/Tyrobp/Axl/Lamp1/Sirpa/Lgals9/Itgal/H2-Eb1/Coro1a/Itgb2/Stat6/Vsir/Trem2/Syk/Nckap1l/Dock8/Il1b/Rps6ka1/Cebpa/Il4ra/Myd88/Cdkn1a/Tgfbr2/Fgr/Ap3d1/Irf1/Sash3/Lgals1/H2-DMb1/Ccdc88b/Ptafr/Il16/Ccr2/Stat5b/Mmp14/Flot2/Tyk2/Ccr7/Tcf3/Zbtb7b/Zmiz1/Itgam/Crlf2/Sphk2/Stxbp2/Gab2/Sirpb1b/Sirpb1c
GO:0045765	GO:0045765	regulation of angiogenesis	44/1091	101/3883	0.000537706	0.0249467	0.0217168	Lgals3/Grn/Pkm/Hmox1/Ninj1/Itgb2/C5ar1/Btg1/Cx3cr1/Tnfrsf1a/Emilin2/Cdh5/Il1b/Klf2/Jup/Rhob/Sh2b3/Tgfbr2/Pxn/Eng/Ptk2b/Acvrl1/Mydgf/Emc10/Hgs/Pik3cd/Epn1/Sars/Itgax/Flcn/Abl1/Pml/Ccr2/Dcn/Id1/Hipk2/Itga5/Add1/Rras/Mapk7/Wars/Stim1/Shc1/Gtf2i
GO:0045944	GO:0045944	positive regulation of transcription by RNA polymerase II	110/1091	301/3883	0.000560746	0.0256778	0.0223532	Slc11a1/Irf7/Spi1/Ybx1/Irf5/Helz2/Nfkbia/Anxa2/Litaf/Stat6/Rxra/Wbp2/Irf8/Hcls1/Glmp/Tnfrsf1a/Il1b/Klf2/Ptbp1/Rps6ka1/Junb/Fos/Akt1/Jup/Cebpa/Ssbp4/Pcbp1/Eng/Rela/Acvrl1/Tfe3/Ap3d1/Etv5/Irf1/Rbck1/Mydgf/Mafb/Akt2/Akna/Lrp5/Bag1/Arhgef2/Srebf1/Usf1/Srebf2/Sbno2/Cebpb/Hcfc1/Sumo2/Supt5/Preb/Flcn/Nr1h2/Pml/Max/Apex1/Mapk3/Eif4a3/Nfkb2/Rnf10/Hmga1/Mef2d/Sirt2/Dcn/Ciita/Stat5b/Cebpd/Elf4/Mrtfa/Trp53/C…
GO:0042330	GO:0042330	taxis	63/1091	157/3883	0.000607415	0.026988	0.0234938	Cd74/Csf1r/Lgals3/Lrp1/Ninj1/Rac2/Spi1/Coro1b/Lgals9/Dusp1/Coro1a/Itgb2/C5ar1/Plxnb2/Rhog/Rac1/Lsp1/Ccl9/Cmtm7/Bin2/Ear2/Prex1/Trem2/Syk/Cx3cr1/Elmo2/Fes/Nckap1l/Il1b/Vasp/Slc8b1/Arrb2/Eng/Ptk2b/Slamf9/P2rx4/Mapk1/Akt2/Pf4/Myo9b/Pip5k1c/Pik3cd/Rin3/Prkcd/Csf3r/Gpr35/Plxna1/Cmklr1/Cyfip1/Cttn/Ptafr/Mapk3/Il16/Gpsm3/Ccr2/Gbf1/Spp1/Ccr7/Nr4a1/C1qbp/Itgam/Abcc1/Notch1
GO:0050866	GO:0050866	negative regulation of cell activation	32/1091	68/3883	0.000612321	0.026988	0.0234938	Cd74/H2-Aa/Tyrobp/Laptm5/Lgals3/Grn/Axl/Hmox1/Spi1/Lgals9/Vsir/Trem2/Cd9/Nckap1l/Fcgr2b/Il4ra/Sh2b3/Abr/Fgr/Prkar1a/Gpnmb/Irf1/Prkcd/Cebpb/Tnfrsf21/Tnfaip8l2/Ccr2/Pkn1/Btk/Zbtb7b/Lag3/Cd37
GO:0060627	GO:0060627	regulation of vesicle-mediated transport	84/1091	221/3883	0.000646354	0.0281363	0.0244934	Lgals3/Tgm2/Axl/Lrp1/Hmox1/Slc11a1/Lamp1/Rac2/Spi1/Sirpa/Msn/Scarb1/Lgals9/Atp13a2/Coro1a/Itgb2/Siglece/Arf1/Anxa2/Fcgr1/Hck/Cd63/Dnm2/Ehd1/Trem2/Syk/Rab5c/Bcl2l1/Cyth1/Rab11b/Fes/Ptpn1/Nckap1l/Fcgr2b/Itsn1/Il1b/Il4ra/Csk/Arrb2/Abr/Fgr/Arhgap1/Mapk1/Map2k2/Akt2/Hgs/Cnn2/Pip5k1c/Rin3/Actn4/Rims3/Preb/Rapgef1/Nr1h2/Ptafr/Sorl1/Mapk3/Rab5b/Insr/Ap2b1/Ldlrap1/Tbc1d20/Sirt2/Ccr2/Gipc1/Add1/Arrb1/Map2k…
GO:0002252	GO:0002252	immune effector process	93/1091	249/3883	0.000665686	0.028312	0.0246463	Cd74/H2-D1/C1qa/C1qc/H2-Aa/Cd5l/Cfp/Tyrobp/H2-K1/Laptm5/Lgals3/Grn/Lrp1/Hmox1/Slc11a1/Lamp1/Irf7/Rac2/Spi1/Tmbim6/Wdr1/Lgals9/Itgal/H2-Eb1/Coro1a/Itgb2/Treml4/Csf2rb/Fcgr1/Gpi1/Stat6/Vsir/Bst2/Irf8/Myo1f/Trem2/Pirb/Syk/Cx3cr1/Tnfrsf1b/Plekhm2/Fes/Nckap1l/Fcgr2b/Il1b/Tap2/Icam1/Il4ra/Myd88/Arrb2/Ptk2b/Abr/Fgr/Csf2rb2/Irf1/Slamf9/Myo1g/Sash3/Il6ra/Lgals1/Lfng/H2-DMb1/Prkcd/Phb2/Sbno2/Cebpb/Rapgef1/…
GO:1901342	GO:1901342	regulation of vasculature development	44/1091	102/3883	0.000694355	0.028312	0.0246463	Lgals3/Grn/Pkm/Hmox1/Ninj1/Itgb2/C5ar1/Btg1/Cx3cr1/Tnfrsf1a/Emilin2/Cdh5/Il1b/Klf2/Jup/Rhob/Sh2b3/Tgfbr2/Pxn/Eng/Ptk2b/Acvrl1/Mydgf/Emc10/Hgs/Pik3cd/Epn1/Sars/Itgax/Flcn/Abl1/Pml/Ccr2/Dcn/Id1/Hipk2/Itga5/Add1/Rras/Mapk7/Wars/Stim1/Shc1/Gtf2i
GO:2000147	GO:2000147	positive regulation of cell motility	74/1091	191/3883	0.000714687	0.028312	0.0246463	Cd74/Csf1r/Actg1/Lgals3/Grn/Lrp1/Hmox1/Rac2/Spi1/Aldoa/Lgals9/Flna/Fermt3/Coro1a/Arpc2/C5ar1/Rac1/Gpi1/Vsir/Acp5/Myo1f/Trem2/Cx3cr1/Nckap1l/Dock8/Cdh5/Il1b/Icam1/Akt1/Rhob/Tgfbr2/Ptk2b/Fgr/Gpnmb/P2rx4/Mapk1/Map2k2/Akt2/Emc10/Map2k3/Arhgef2/Pik3cd/Myadm/Actn4/Itgax/Rin2/Cmklr1/Abl1/P2ry6/Ptafr/Mapk3/Rhoc/Myo1c/Gpsm3/Map3k3/Insr/Ccr2/Trp53/Mmp14/Hdac4/Itga5/Map2k1/Ccr7/Jun/Rras/C1qbp/Abcc1/Notch1/G…
GO:0030335	GO:0030335	positive regulation of cell migration	73/1091	188/3883	0.000719716	0.028312	0.0246463	Cd74/Csf1r/Actg1/Lgals3/Grn/Lrp1/Hmox1/Rac2/Spi1/Aldoa/Lgals9/Flna/Fermt3/Coro1a/Arpc2/C5ar1/Rac1/Gpi1/Vsir/Acp5/Myo1f/Trem2/Cx3cr1/Nckap1l/Dock8/Cdh5/Il1b/Icam1/Akt1/Rhob/Tgfbr2/Ptk2b/Fgr/Gpnmb/P2rx4/Mapk1/Akt2/Emc10/Map2k3/Arhgef2/Pik3cd/Myadm/Actn4/Itgax/Rin2/Cmklr1/Abl1/P2ry6/Ptafr/Mapk3/Rhoc/Myo1c/Gpsm3/Map3k3/Insr/Ccr2/Trp53/Mmp14/Hdac4/Itga5/Map2k1/Ccr7/Jun/Rras/C1qbp/Abcc1/Notch1/Gab2/Cam…
GO:0048514	GO:0048514	blood vessel morphogenesis	73/1091	188/3883	0.000719716	0.028312	0.0246463	Actg1/Lgals3/Grn/Pkm/Lrp1/Hmox1/Ninj1/Spi1/Flna/Tnfaip2/Itgb2/C5ar1/Anxa2/Btg1/Rxra/Syk/Cx3cr1/Sgpl1/Tnfrsf1a/Emilin2/Cdh5/Il1b/Klf2/Kctd10/Junb/Akt1/Jup/Rhob/Sh2b3/Tgfbr2/Pxn/Eng/Ptk2b/Acvrl1/Hs6st1/Vav2/Mydgf/Wasf2/Lrp5/Emc10/Hgs/Xdh/Pik3cd/Epn1/Sars/Itgax/Rin2/Flcn/Abl1/Pml/Map3k3/Ccr2/Dcn/Id1/Hipk2/Itga5/Zfp36l1/Add1/Prcp/Arhgap22/Jun/Zmiz1/Rras/Nr4a1/Mapk7/Wars/Stim1/Notch1/Angptl4/Shc1/Epor…
GO:0007229	GO:0007229	integrin-mediated signaling pathway	22/1091	42/3883	0.000723433	0.028312	0.0246463	Tyrobp/Itgal/Flna/Zyx/Itgb5/Fermt3/Itgb2/Cd63/Syk/Tln1/Pxn/Ptk2b/Fgr/Itgax/Abl1/Itga5/Rcc2/Itgam/Isg15/Gab2/Ptpn11/Itga4
GO:0071870	GO:0071870	cellular response to catecholamine stimulus	12/1091	18/3883	0.000729235	0.028312	0.0246463	Tgm2/Flna/Gnas/Dnm2/Mapk1/Ncstn/Slc9a3r1/Mapk3/Sirt2/Atf4/Slc9a1/Dtnbp1
GO:0035239	GO:0035239	tube morphogenesis	87/1091	231/3883	0.000730684	0.028312	0.0246463	Actg1/Lgals3/Grn/Tgm2/Pkm/Lrp1/Hmox1/Ninj1/Spi1/Flna/Tnfaip2/Itgb2/C5ar1/Plxnb2/Anxa2/Btg1/Ctsz/Rxra/Syk/Cx3cr1/Sgpl1/Tnfrsf1a/Emilin2/Cdh5/Il1b/Klf2/Vasp/Kctd10/Junb/Akt1/Jup/Rhob/Sh2b3/Tgfbr2/Pxn/Eng/Ptk2b/Acvrl1/Hs6st1/Vav2/Etv5/Mydgf/Wasf2/Lrp5/Emc10/Hgs/Xdh/Pik3cd/Phb2/Epn1/Sars/Itgax/Rin2/Flcn/Abl1/Pml/Asb2/Map3k3/Ccr2/Dcn/Gatad2a/Id1/Tgif1/Hipk2/Mmp14/Itga5/Zfp36l1/Pkd1/Add1/Prcp/Arhgap22/…
GO:0007162	GO:0007162	negative regulation of cell adhesion	40/1091	91/3883	0.000766996	0.029396	0.0255899	Cd74/H2-Aa/Laptm5/Lgals3/Lrp1/Spi1/Lgals9/Dusp1/Plxnb2/Vsir/Acp5/Myo1f/Coro1c/Cd9/Nckap1l/Akt1/Il4ra/Sh2b3/Acvrl1/Prkar1a/Gpnmb/Irf1/Akna/Lgals1/Prkcd/Myadm/Actn4/Cebpb/Plxna1/Abl1/Tnfrsf21/Tnfaip8l2/Mmp14/Map2k1/Rcc2/Zbtb7b/Mapk7/Lag3/Notch1/Ptpn11
GO:0007417	GO:0007417	central nervous system development	75/1091	195/3883	0.000844767	0.0316731	0.0275722	Csf1r/Psap/C1qa/Tyrobp/Grn/Axl/Lrp1/Wdr1/Flna/Id3/Capg/C5ar1/Plxnb2/Tpp1/Grk2/Rac1/Napa/Nrros/Vim/Marcksl1/Trem2/Cx3cr1/Tnfrsf1b/Slc45a3/Fcgr2b/Il1b/Akt1/Cln8/Btg2/Tgfbr2/Abr/Dctn1/Gsn/Mapk1/Mafb/Akna/Naglu/Ncstn/Aars/Abl1/Tnfrsf21/Mapk3/Csnk1d/Ndel1/Srgap2/Pafah1b2/Fbxw11/Map1s/Sirt2/Cnp/Mrtfa/Prpf19/Trp53/Scyl1/Mboat7/Map2k1/Trappc9/Pex5/Ndst1/Ogdh/Zmiz1/Pias4/Ncor2/Itgam/Arid1a/Sphk2/Notch1/Re…
GO:0051402	GO:0051402	neuron apoptotic process	43/1091	100/3883	0.000862341	0.0316731	0.0275722	Tyrobp/Grn/Axl/Gapdh/Lrp1/Hmox1/Coro1a/C5ar1/Gpi1/Ctsz/G6pdx/Trem2/Cx3cr1/Bcl2l1/Tnfrsf1a/Itsn1/Il1b/Btg2/Map3k11/Arrb2/Ptk2b/Akt2/Bag1/Ncstn/Cebpb/Aars/Abl1/Egln2/Tnfrsf21/Gclm/Sigmar1/Trp53/Hipk2/Hdac4/Arrb1/Pigt/Jun/Itgam/Parp1/Atf4/Ralbp1/Epor/Aatk
GO:0070997	GO:0070997	neuron death	57/1091	141/3883	0.000884293	0.0318034	0.0276857	C1qa/Tyrobp/Grn/Axl/Gapdh/Lrp1/Hmox1/Coro1a/C5ar1/Gpi1/Ctsz/G6pdx/Trem2/Cx3cr1/Tnfrsf1b/Bcl2l1/Tnfrsf1a/Fcgr2b/Itsn1/Il1b/Fos/Btg2/Map3k11/Arrb2/Ptk2b/Gpnmb/Akt2/Bag1/Ncstn/Cebpb/Aars/Abl1/Egln2/Tnfrsf21/Sorl1/Ap2b1/Gclm/Sigmar1/Trp53/Slc23a2/Hipk2/Hdac4/Arrb1/Pigt/Ppp5c/Jun/Capn2/Itgam/Tmem259/Parp1/Abcc1/Atf4/Slc9a1/Ralbp1/Dtnbp1/Epor/Aatk
GO:0051493	GO:0051493	regulation of cytoskeleton organization	68/1091	174/3883	0.000887773	0.0318034	0.0276857	Csf1r/Actg1/Lrp1/Arhgdia/Arpc1b/Cotl1/Rac2/Coro1b/Wdr1/Flna/Coro1a/Capg/Arpc2/Rhog/Arf1/Rac1/Hck/Bst2/Arpc3/Myo1f/Hcls1/Brk1/Fes/Arap1/Nckap1l/Cdh5/Vasp/Icam1/Rhob/Pxn/Dync1h1/Ptk2b/Fgr/Dctn1/Dbnl/Gsn/Chmp1a/Mapk1/Wasf2/Arhgef2/Prkcd/Myadm/Sh3pxd2b/Abl1/Cyfip1/Cttn/Mapk3/Rhoc/Myo1c/Twf2/Map1s/Numa1/Id1/Chmp6/Pkd1/Add1/Was/Fhod1/Flii/Stmn1/Trim27/Nup62/Capn2/Vill/Rhobtb1/Arpc1a/Diaph1/Pik3r2
GO:1903350	GO:1903350	response to dopamine	10/1091	14/3883	0.000929028	0.0318034	0.0276857	Tgm2/Flna/Gnas/Dnm2/Mapk1/Ncstn/Slc9a3r1/Mapk3/Atf4/Dtnbp1
GO:0019320	GO:0019320	hexose catabolic process	8/1091	10/3883	0.00097036	0.0321398	0.0279786	Ldha/Eno1/Gpi1/Lrp5/Pfkl/Glb1/Trp53/Pfkp
GO:0034097	GO:0034097	response to cytokine	126/1091	357/3883	0.00111475	0.0363947	0.0316825	Cd74/Csf1r/H2-Aa/Laptm5/Actg1/Tuba1b/Axl/Gapdh/Eno1/Slc11a1/Irf7/Spi1/Sirpa/H2-Eb1/Zyx/Dusp1/Ybx1/Coro1a/Capg/Irf5/Grk2/Nfkbia/Csf2rb/Stat6/Adipor1/Lsp1/Bst2/Acp5/Ccl9/Irf8/Vim/Trem2/Trim25/Pirb/Mapkapk2/Syk/Cx3cr1/Hcls1/Pcolce2/Bcl2l1/Il10ra/Oas3/Tnfrsf1a/Dock8/Timp2/Il1b/Srm/Icam1/Nkiras2/Akt1/Cebpa/Csf2ra/Il4ra/Ifngr2/Sh2b3/Myd88/Cdk4/Ptk2b/Rela/Csf2rb2/Gsn/Irf1/Zfp36/Mapk1/Oasl1/Pf4/Mkrn1/Il6…
GO:0050670	GO:0050670	regulation of lymphocyte proliferation	35/1091	79/3883	0.00135967	0.0422425	0.0367732	Cd74/H2-Aa/Tyrobp/Laptm5/Lgals3/Rac2/Lgals9/Itgal/Coro1a/Vsir/Syk/Tnfrsf1b/Nckap1l/Fcgr2b/Il1b/Myd88/Cdkn1a/Tgfbr2/Prkar1a/Gpnmb/Irf1/Sash3/H2-DMb1/Cebpb/Ccdc88b/Tnfrsf21/Ccr2/Stat5b/Pkn1/Btk/Tyk2/Ccr7/Tcf3/Zbtb7b/Cd209a
GO:0048705	GO:0048705	skeletal system morphogenesis	21/1091	41/3883	0.00138909	0.0425906	0.0370762	Gnas/Acp5/Por/Sgpl1/Tgfbr2/Fgr/Tifab/Lrp5/Sh3pxd2b/Eif4a3/Mef2d/Mmp14/Pkd1/Zfand5/Ndst1/Idua/Nab2/Inppl1/Hyal2/Ext2/Ski
GO:0030048	GO:0030048	actin filament-based movement	15/1091	26/3883	0.00142918	0.0426696	0.037145	Flna/Atp1a1/Myo1f/Jup/Gsn/Wasf2/Myo1g/Myo9b/Actn4/Myo1c/Snta1/Was/Adrb1/Camk2d/Wipf1
GO:0032615	GO:0032615	interleukin-12 production	15/1091	26/3883	0.00142918	0.0426696	0.037145	Laptm5/Unc93b1/Acp5/Irf8/G6pdx/Syk/Arrb2/Rela/Irf1/Prkcd/Cmklr1/Il16/Ccr7/C1qbp/Nfkb1
GO:0008285	GO:0008285	negative regulation of cell population proliferation	71/1091	186/3883	0.00146906	0.0426696	0.037145	Csf1r/H2-Aa/Tyrobp/Laptm5/Fth1/Lgals3/Hmox1/Lgals9/Dusp1/Vsir/Btg1/Rxra/Trem2/Cd9/Slfn2/Fcgr2b/Timp2/Cdh5/Il1b/Gna12/Cebpa/Sh2b3/Btg2/Csk/Cdkn1a/Tgfbr2/Eng/Ptk2b/Acvrl1/Prkar1a/Gpnmb/Irf1/Sf1/Xdh/Phb2/Cops8/Cebpb/Rapgef1/Flcn/Pml/Tnfrsf21/Slc9a3r1/Rnf10/Hmga1/Trpv2/Sirt2/Pkn1/Lmna/Tax1bp3/Tgif1/Trp53/Niban2/Hdac4/Stk11/Btk/Med25/Bap1/S1pr2/Map2k1/Jun/Nup62/Zbtb7b/Inppl1/Cers2/Notch1/Wdr77/Cd37/Ra…
GO:0071867	GO:0071867	response to monoamine	12/1091	19/3883	0.00147637	0.0426696	0.037145	Tgm2/Flna/Gnas/Dnm2/Mapk1/Ncstn/Slc9a3r1/Mapk3/Sirt2/Atf4/Slc9a1/Dtnbp1
GO:0005975	GO:0005975	carbohydrate metabolic process	69/1091	180/3883	0.00149988	0.0429966	0.0374297	Ldha/Gapdh/Pkm/Eno1/Hexa/Aldoa/Man2b1/Taldo1/Gpi1/Tpi1/Adipor1/Pgd/Hk3/G6pdx/Slc45a3/Pgam1/Gaa/Akt1/Zbtb7a/Nisch/Man2b2/Pygb/Isyna1/Ptk2b/Cpt1a/Ddb1/St6galnac4/Akt2/Lrp5/Ganab/Cs/Usf1/Pfkl/Fabp5/Glb1/P2ry6/Ptafr/Naga/Adpgk/Pgls/Insr/Trp53/Slc23a2/Sesn2/Hdac4/Stk11/Chil3/Neu1/Coq2/H6pd/Maea/Ndst1/Ogdh/Pfkfb4/Idua/Adrb1/Inppl1/Pfkp/Mpdu1/Nfkb1/Atf4/B4galt5/Hyal2/Siae/Gnptg/Pmm2/Ext2/Gyg/Ncoa2
GO:0045785	GO:0045785	positive regulation of cell adhesion	62/1091	159/3883	0.00158191	0.0442684	0.0385368	Cd74/H2-Aa/Tgm2/Ninj1/Sirpa/Lgals9/Itgal/H2-Eb1/Flna/Coro1a/Arpc2/Itgb2/Rac1/Vsir/Cd63/Dnm2/Prex1/Syk/Nckap1l/Dock8/Emilin2/Il1b/Icam1/Jup/Il4ra/Tgfbr2/Ptk2b/Rela/Tfe3/Ap3d1/Irf1/Sash3/Il6ra/Lgals1/H2-DMb1/Myadm/Rin2/Flcn/Ccdc88b/Abl1/Ptafr/Ccr2/Stat5b/Spp1/Itga5/Dennd6a/Flot2/Tyk2/Ccr7/Triobp/Zbtb7b/Zmiz1/Rras/C1qbp/Irak1/Sirpb1b/Sirpb1c/Ptpn11/Itga4/Piezo1/Apbb1ip/Pik3r2
GO:0001649	GO:0001649	osteoblast differentiation	22/1091	44/3883	0.00161738	0.0449046	0.0390906	Id3/Gnas/H3f3a/Junb/Akt1/Cebpa/Lrp5/Sh3pxd2b/Cebpb/Fam20c/Mef2d/Adar/Cebpd/Id1/Spp1/Lmna/Hdac4/Nbr1/Limd1/Notch1/Atf4/Ski
GO:0071345	GO:0071345	cellular response to cytokine stimulus	110/1091	309/3883	0.00165864	0.0453362	0.0394664	Cd74/Csf1r/Laptm5/Actg1/Tuba1b/Axl/Gapdh/Eno1/Irf7/Spi1/Sirpa/Zyx/Dusp1/Ybx1/Coro1a/Capg/Irf5/Grk2/Nfkbia/Csf2rb/Stat6/Adipor1/Lsp1/Ccl9/Irf8/Vim/Trem2/Trim25/Pirb/Syk/Cx3cr1/Hcls1/Pcolce2/Il10ra/Oas3/Tnfrsf1a/Dock8/Il1b/Srm/Icam1/Nkiras2/Akt1/Cebpa/Csf2ra/Il4ra/Ifngr2/Sh2b3/Myd88/Cdk4/Ptk2b/Rela/Csf2rb2/Gsn/Irf1/Zfp36/Mapk1/Oasl1/Pf4/Mkrn1/Il6ra/Rab43/Keap1/Cdc37/Sbno2/Csf3r/Actn4/Cebpb/Gpr35/Tx…
GO:0042063	GO:0042063	gliogenesis	42/1091	100/3883	0.00173029	0.0469309	0.0408545	Csf1r/C1qa/Grn/Lrp1/Wdr1/C5ar1/Grk2/Nrros/Vim/Trem2/Cx3cr1/Cd9/Tnfrsf1b/Slc45a3/Il1b/Akt1/Rela/Etv5/P2rx4/Mapk1/Akt2/Bag1/Ncstn/Abl1/Tnfrsf21/Mapk3/Rnf10/Srgap2/Sirt2/Ccr2/Cnp/Prpf19/Mboat7/Map2k1/Zmiz1/Nab2/Itgam/Cers2/Notch1/B4galt5/Ptpn11/Ski
GO:0030510	GO:0030510	regulation of BMP signaling pathway	11/1091	17/3883	0.00176904	0.0476155	0.0414505	Vsir/Cdh5/Eng/Acvrl1/Fkbp8/Abl1/Sorl1/Numa1/Hipk2/Notch1/Ski
GO:0006022	GO:0006022	aminoglycan metabolic process	14/1091	24/3883	0.00178366	0.0476453	0.0414765	Hexa/Gns/Ccnd3/Il1b/Sgsh/Cln6/Dcn/Chil3/Ndst1/Idua/Nfkb1/B4galt5/Hyal2/Ext2
check for all GO

## Sheet: gold
	ID	Description	GeneRatio	BgRatio	pvalue	p.adjust	qvalue	geneID	Count	GeneRatio_perc	geneID_SYMBOL
KEGG_RIBOSOME	KEGG_RIBOSOME	KEGG_RIBOSOME	59/187	76/1581	1.7824e-43	2.15671e-41	2.15671e-41	76808/11837/16785/16898/56040/22121/67891/19988/19921/19951/27050/76846/27367/20085/20102/20103/20091/19989/20084/20005/27207/19941/20115/110954/20104/68436/26961/54127/20088/27176/19933/67115/268449/66480/319195/67186/67097/22186/267019/68193/54217/57808/20068/67427/27370/68052/19896/66475/14109/19944/65019/67248/67281/66483/26451/19982/66481/19934/68028	59	0.3155	Rpl18a/Rplp0/Rpsa/Rps2/Rplp1/Rpl13a/Rpl4/Rpl6/Rpl19/Rpl32/Rps3/Rps9/Rpl3/Rps19/Rps4x/Rps5/Rps3a1/Rpl7/Rps18/Rpl9/Rps11/Rpl26/Rps7/Rpl10/Rps6/Rpl34/Rpl8/Rps28/Rps24/Rpl7a/Rpl21/Rpl14/Rpl23a/Rpl15/Rpl17/Rplp2/Rps10/Uba52/Rps15a/Rpl24/Rpl36/Rpl35a/Rps17/Rps20/Rps26/Rps13/Rpl10a/Rps23/Fau/Rpl29/Rpl23/Rpl39/Rpl37/Rpl36al/Rpl27a/Rpl36a/Rps21/Rpl22/Rpl22l1
HALLMARK_PROTEIN_SECRETION	HALLMARK_PROTEIN_SECRETION	HALLMARK_PROTEIN_SECRETION	33/525	55/1607	2.07805e-05	0.000976683	0.000699975	13032/11487/67300/16784/56334/11303/68581/19063/67804/20619/17113/72736/68365/20479/50797/53331/70349/70361/54214/213827/59021/13518/16561/211673/22088/56041/100226/11765/11605/21985/22319/53330/66471	33	0.0629	Ctsc/Adam10/Cltc/Lamp2/Tmed2/Abca1/Tmed10/Ppt1/Snx2/Snap23/M6pr/Tmx1/Rab14/Vps4b/Copb2/Stx7/Copb1/Lman1/Golga4/Arcn1/Rab2a/Dst/Kif1b/Arfgef1/Tsg101/Uso1/Stx12/Ap1g1/Gla/Tpd52/Vamp3/Vamp4/Anp32e
HALLMARK_ANDROGEN_RESPONSE	HALLMARK_ANDROGEN_RESPONSE	HALLMARK_ANDROGEN_RESPONSE	27/525	47/1607	0.000336806	0.00474014	0.00339719	12010/20229/14595/17289/20363/20249/76687/14229/27057/20393/17132/14782/71817/56469/16410/20250/70361/544963/231070/106869/27362/30960/14679/66384/21985/56228/56376	27	0.0514	B2m/Sat1/B4galt1/Mertk/Selenop/Scd1/Spcs3/Fkbp5/Ncoa4/Sgk1/Maf/Gsr/Tmem50a/Pias1/Itgav/Scd2/Lman1/Iqgap2/Insig1/Tnfaip8/Dnajb9/Vapa/Gnai3/Srp19/Tpd52/Ube2j1/Pdlim5
HALLMARK_TNFA_SIGNALING_VIA_NFKB	HALLMARK_TNFA_SIGNALING_VIA_NFKB	HALLMARK_TNFA_SIGNALING_VIA_NFKB	45/525	90/1607	0.000338158	0.00474014	0.00339719	20229/14595/12505/12522/17118/56193/11303/67972/15902/59027/12633/23849/17210/18024/20296/20393/16175/54720/20303/56706/11796/26410/18578/23872/12044/24088/15958/14284/106869/18793/11910/13653/216850/20893/19347/21847/21353/99929/13654/15945/230073/15205/71712/71586/56376	45	0.0857	Sat1/B4galt1/Cd44/Cd83/Marcks/Plek/Abca1/Atp2b1/Id2/Nampt/Cflar/Klf6/Mcl1/Nfe2l2/Ccl2/Sgk1/Il1a/Rcan1/Ccl4/Ccnl1/Birc3/Map3k8/Pde4b/Ets2/Bcl2a1a/Tlr2/Ifit2/Fosl2/Tnfaip8/Plaur/Atf3/Egr1/Kdm6b/Bhlhe40/Dennd5a/Klf10/Tank/Tiparp/Egr2/Cxcl10/Ddx58/Hes1/Dram1/Ifih1/Pdlim5
HALLMARK_G2M_CHECKPOINT	HALLMARK_G2M_CHECKPOINT	HALLMARK_G2M_CHECKPOINT	32/525	59/1607	0.000403416	0.00474014	0.00339719	15481/20382/17118/51810/18129/17975/269966/16573/71375/20462/22589/18969/21969/11702/12576/103573/16211/26965/19134/71514/16647/24061/20588/105727/19357/110809/15251/238247/14105/17215/18472/14852	32	0.061	Hspa8/Srsf2/Marcks/Hnrnpu/Notch2/Ncl/Nup98/Kif5b/Foxn3/Tra2b/Atrx/Pola2/Top1/Amd1/Cdkn1b/Xpo1/Kpnb1/Cul1/Prpf4b/Sfpq/Kpna2/Smc1a/Smarcc1/Slc38a1/Rad21/Srsf1/Hif1a/Arid4a/Srsf10/Mcm3/Pafah1b1/Gspt1
HALLMARK_MTORC1_SIGNALING	HALLMARK_MTORC1_SIGNALING	HALLMARK_MTORC1_SIGNALING	53/525	114/1607	0.000996407	0.00936623	0.00671264	19141/14828/13032/12330/66713/22027/74117/64136/15926/20867/20249/17113/59027/28146/107513/19324/18451/14190/22433/63913/15510/56637/14782/73834/19181/12301/15526/20250/15528/54353/14718/15277/67204/231070/15525/20525/20893/56480/11938/12450/107508/56041/59029/56207/21399/229363/11605/18655/20491/66997/13198/67089/70699	53	0.101	Lgmn/Hspa5/Ctsc/Canx/Actr2/Hsp90b1/Actr3/Sdf2l1/Idh1/Stip1/Scd1/M6pr/Nampt/Serp1/Ssr1/Rab1a/P4ha1/Fgl2/Xbp1/Niban1/Hspd1/Gsk3b/Gsr/Atp6v1d/Psmc2/Cacybp/Hspa9/Scd2/Hspe1/Skap2/Got1/Hk2/Eif2s2/Insig1/Hspa4/Slc2a1/Bhlhe40/Tbk1/Atp2a2/Ccng1/Eprs/Uso1/Psmd14/Uchl5/Tcea1/Gmps/Gla/Pgk1/Sla/Psmd12/Ddit3/Psmc6/Nup205
GO:0043484	GO:0043484	regulation of RNA splicing	39/1310	63/3883	3.76602e-06	0.00590508	0.00546806	Hspa8/Ddx5/Srsf2/Hnrnpk/Qk/Hnrnpu/Son/Mbnl1/Rbm39/Hnrnpf/Wtap/Npm1/Ncl/Hnrnpa2b1/Nup98/Clk1/Rbm5/Celf2/Pik3r1/Ptbp3/Tra2b/Rbm3/Srsf5/Ccnl1/Rbm25/Mbnl2/Rbm17/Srrm1/Hnrnph1/Rbm7/Hnrnph2/Srsf7/Srsf1/Srsf10/Ccnl2/Khdrbs1/Srsf6/Srsf3/Acin1
GO:0051276	GO:0051276	chromosome organization	115/1310	243/3883	4.12182e-06	0.00590508	0.00546806	Hsp90ab1/Tcf7l2/H3f3b/Hsp90aa1/Ptges3/Ifi207/Morf4l1/Set/Dnmt3a/Hnrnpu/Hspa1a/Mettl3/Ifi204/Cbx3/Npm1/Cct8/Tpr/Hnrnpa2b1/Mier1/Cct5/Cebpg/Gsk3b/Cct4/Nsd3/Tcp1/Vps4b/Pcna/Resf1/Ogt/Kdm5a/Atrx/Macroh2a1/Top1/Nr3c1/Sp100/Ik/Naa50/Ssrp1/Anapc15/Bptf/Mcmbp/Nipbl/Morf4l2/Atf7ip/Tnks2/Ubr2/Dek/Baz1a/Pik3ca/Ube2b/Kpnb1/Pak1/Prkcb/Sfpq/Kmt2e/Bag6/Smc1a/Phf20/Selenof/Rnf4/Jmjd1c/Pbrm1/Mta3/Kdm6b/Gatad2b/Ns…
GO:0042026	GO:0042026	protein refolding	11/1310	11/3883	6.26639e-06	0.00590508	0.00546806	Hspa8/B2m/Hspa5/Hsp90aa1/Dnaja1/Hspa1a/St13/Hspd1/Hspa9/Dnaja2/Hspa1b
GO:1903311	GO:1903311	regulation of mRNA metabolic process	54/1310	98/3883	8.85856e-06	0.00590508	0.00546806	Hspa8/Ddx5/Srsf2/Tent5a/Pabpc1/Hnrnpk/Qk/Pan3/Csde1/Hnrnpu/Son/Mbnl1/Rbm39/Mettl3/Wtap/Npm1/Zc3hav1/Ncl/Hnrnpa2b1/Nup98/Rbm5/Zfp36l2/Celf2/Hnrnpab/Hnrnpm/Ptbp3/Tra2b/Rbm3/Alkbh5/Larp4b/Rbm25/Mbnl2/Srrm1/Rock1/Tut7/Paip1/Rbm7/Rock2/Tardbp/Papola/Srsf7/Srsf1/Srsf10/Khdrbs1/Cdk9/Safb2/Noct/Hnrnpr/Srsf6/Sltm/Srsf3/Safb/Tnrc6b/Acin1
GO:0050684	GO:0050684	regulation of mRNA processing	34/1310	54/3883	9.33664e-06	0.00590508	0.00546806	Hspa8/Ddx5/Srsf2/Hnrnpk/Qk/Hnrnpu/Son/Mbnl1/Rbm39/Wtap/Npm1/Ncl/Hnrnpa2b1/Nup98/Rbm5/Celf2/Ptbp3/Tra2b/Rbm3/Rbm25/Mbnl2/Srrm1/Rbm7/Papola/Srsf7/Srsf10/Khdrbs1/Cdk9/Safb2/Srsf6/Sltm/Srsf3/Safb/Acin1
GO:0035458	GO:0035458	cellular response to interferon-beta	22/1310	30/3883	1.00769e-05	0.00590508	0.00546806	Gbp2b/Ifi207/Gbp2/Tgtp2/Ifit3/Ifi204/Ifi203/Stat1/Gbp7/Mndal/Gbp3/Ifi205/Gm4951/Irgm1/Irgm2/Iigp1/Ifi209/Ifi211/Ifi47/Igtp/Ifi206/Ifi213
GO:0010558	GO:0010558	negative regulation of macromolecule biosynthetic process	150/1310	340/3883	2.00024e-05	0.00987041	0.00913992	Hspa8/Mmp12/Tcf7l2/Sdcbp/Cd38/Cd36/Asah1/Tsc22d3/Lilrb4a/Ddx5/Lilrb4b/Cltc/Ifi207/Id2/Pabpc1/Hnrnpk/Tmem59/Qk/Pan3/Csde1/Set/Dnmt3a/Hnrnpu/Notch2/Ywhaz/Hbp1/Mettl3/Ifi204/App/Dab2/Cbx3/Zeb2/Tpr/Cnbp/Caprin1/Ncl/Hnrnpa2b1/Mier1/Eif4a2/Skil/Xbp1/Txnip/Dapk1/Nsd3/Maf/Zbtb4/Foxn3/Zfp36l2/Crebbp/Selenos/Pcna/Spop/Zfp263/Pias1/Mtdh/Hnrnpab/Eif2s1/Kdm5a/Tgfbr1/Bank1/Atrx/Snx6/Macroh2a1/Ywhaq/Hipk1/Nr3c1…
GO:0031327	GO:0031327	negative regulation of cellular biosynthetic process	157/1310	361/3883	3.27118e-05	0.0127794	0.0118337	Hspa8/Mmp12/Tcf7l2/Sdcbp/Cd38/Entpd1/Cd36/Asah1/Tsc22d3/Lilrb4a/Ddx5/Lilrb4b/Plek/Ifi207/Id2/Pabpc1/Hnrnpk/Tmem59/Qk/Pan3/Csde1/Set/Dnmt3a/Hnrnpu/Notch2/Ywhaz/Hbp1/Mettl3/Ifi204/App/Dab2/Cbx3/Zeb2/Tpr/Cnbp/Caprin1/Ncl/Hnrnpa2b1/Mier1/Eif4a2/Skil/Xbp1/Txnip/Dapk1/Nsd3/Maf/Zbtb4/Foxn3/Zfp36l2/Crebbp/Pcna/Spop/Zfp263/Pias1/Mtdh/Hnrnpab/Eif2s1/Kdm5a/Tgfbr1/Bank1/Atrx/Snx6/Macroh2a1/Ywhaq/Hipk1/Nr3c1/…
GO:0033365	GO:0033365	protein localization to organelle	141/1310	320/3883	3.92674e-05	0.013355	0.0123667	Cd81/Hspa8/Hsp90ab1/Folr2/Mmp12/Hspa5/Hsp90aa1/Dnaja1/Cd36/Lilrb4a/Hsph1/Ddx5/Adam10/Kdelr2/Lilrb4b/Spcs2/Lamp2/Tcirg1/Cd68/Tmed10/Herpud1/Srgn/Rab7/M6pr/Hnrnpu/Ywhaz/Ywhae/Mapre1/App/Ctnna1/Npm1/Cct8/Tpr/Cct5/Nup98/Spcs3/Lmbrd1/Macf1/Srp72/Arf4/Xbp1/Vps35/Txnip/Hspd1/Gsk3b/Cct4/Ncoa4/Mapre2/Tcp1/Tram1/Atp6v1d/Gpr137b/Ogt/Pik3r1/Sh3glb1/Hnrnpm/Atrx/Pola2/Macroh2a1/Mfsd1/Ssr3/Rdx/Rap1a/Cep350/Sp10…
GO:0010628	GO:0010628	positive regulation of gene expression	158/1310	365/3883	4.1782e-05	0.013355	0.0123667	Cd81/Hspa8/B2m/Mmp12/Cd14/Lpl/Fcgr3/Cd44/Cd83/Hsp90aa1/Cd36/Ncoa3/Ddx5/Cd86/Il2rg/Ptges3/Clec4n/Hfe/Ptprc/Cadm1/Tmed2/Tent5a/Tmed10/Ifi207/Id2/Ifngr1/Hnrnpk/Qk/Atp6ap2/Lilra5/Csde1/Hnrnpu/Hspa1a/Mettl3/Serp1/Rab1a/Ifi204/App/Npm1/Stat1/Selenok/Cnbp/Adam17/Pmp22/Zc3hav1/Ncl/Ctnnd1/Nup98/Mndal/Nfe2l2/Cd84/Xbp1/Ccl2/Niban1/Vps35/Cebpg/Cd1d1/Hspd1/Nras/Gsk3b/Myh9/Oas2/Maf/Dnajc3/Cd55/Il1a/Crebbp/Ogt/…
GO:0000380	GO:0000380	alternative mRNA splicing, via spliceosome	20/1310	28/3883	4.87291e-05	0.0142776	0.013221	Ddx5/Srsf2/Hnrnpu/Mbnl1/Wtap/Rbm5/Celf2/Hnrnpm/Tra2b/Hnrnpa1/Rbm25/Mbnl2/Rbm17/Slu7/Sfpq/Rbm7/Srsf1/Khdrbs1/Srsf6/Rsrc1
GO:0006986	GO:0006986	response to unfolded protein	33/1310	55/3883	5.30035e-05	0.0143354	0.0132745	Hspa8/Hspa5/Hsp90aa1/Hsph1/Tmed2/Herpud1/Hspa1a/Manf/Serp1/Pmp22/Nfe2l2/Xbp1/Hspd1/Derl2/Tram1/Dnajc3/Selenos/Pik3r1/Eif2s1/Hspa9/Ddrgk1/Hspa4l/Tmem33/Dnajb9/Atf3/Ubxn4/Nck1/Eif2ak2/Erp44/Stt3b/Hspa1b/Bfar/Ddit3
GO:0051253	GO:0051253	negative regulation of RNA metabolic process	138/1310	315/3883	6.7202e-05	0.0168773	0.0156283	Hspa8/Mmp12/Tcf7l2/Sdcbp/Cd38/Cd36/Asah1/Tsc22d3/Lilrb4a/Ddx5/Lilrb4b/Tent5a/Ifi207/Id2/Hnrnpk/Qk/Csde1/Set/Dnmt3a/Hnrnpu/Notch2/Ywhaz/Hbp1/Ifi204/App/Dab2/Cbx3/Npm1/Zeb2/Tpr/Cnbp/Hnrnpa2b1/Mier1/Eif4a2/Skil/Xbp1/Txnip/Nsd3/Maf/Zbtb4/Foxn3/Crebbp/Pcna/Spop/Zfp263/Pias1/Mtdh/Hnrnpab/Kdm5a/Tgfbr1/Ptbp3/Tra2b/Atrx/Snx6/Macroh2a1/Ywhaq/Larp4b/Hipk1/Nr3c1/Bclaf1/Sp100/Cdkn1b/Bptf/Mef2a/Nipbl/Lrrfip1/A…
GO:0071216	GO:0071216	cellular response to biotic stimulus	53/1310	102/3883	9.31108e-05	0.0173092	0.0160281	B2m/Hspa5/Cd14/Cd36/Lilrb4a/Mrc1/Cxcl13/Cd86/Fcgr4/Abca1/Cd68/Gbp2/Notch2/Stat1/Trim30a/Ncl/Cd84/Cxcl9/Xbp1/Ccl2/Txnip/Cfh/Gsk3b/Cd300lb/Cd55/Il1a/Selenos/Mtdh/Ogt/Adam9/Casp1/Irgm1/Tlr1/Ccdc47/Pde4b/Tlr2/Tlr4/Pdcd4/Prpf8/Ly86/Smc1a/Igtp/Cd274/Trim12a/Ppp1r15b/Scimp/Sash1/Klrk1/Cxcl10/Tmco1/Ddit3/Cmpk2/Bid
GO:0009890	GO:0009890	negative regulation of biosynthetic process	163/1310	383/3883	9.40352e-05	0.0173092	0.0160281	Hspa8/Mmp12/Tcf7l2/Sdcbp/Cd38/Entpd1/Cd36/Asah1/Tsc22d3/Lilrb4a/Ddx5/Lilrb4b/Cltc/Plek/Ifi207/Id2/Pabpc1/Hnrnpk/Tmem59/Qk/Pan3/Csde1/Set/Dnmt3a/Hnrnpu/Notch2/Ywhaz/Hbp1/Mettl3/Ifi204/App/Dab2/Cbx3/Zeb2/Tpr/Cnbp/Cflar/Caprin1/Ncl/Hnrnpa2b1/Mier1/Eif4a2/Skil/Xbp1/Txnip/Hspd1/Dapk1/Nsd3/Maf/Zbtb4/Foxn3/Zfp36l2/Crebbp/Selenos/Pcna/Spop/Zfp263/Pias1/Mtdh/Hnrnpab/Eif2s1/Kdm5a/Tgfbr1/Bank1/Atrx/Snx6/Mac…
GO:0016071	GO:0016071	mRNA metabolic process	101/1310	221/3883	9.68499e-05	0.0173092	0.0160281	Hspa8/Ddx5/Srsf2/Tent5a/Pabpc1/Hnrnpk/Sf3b1/Qk/Pan3/Csde1/Hnrnpu/Son/Hspa1a/Mbnl1/Rbm39/Mettl3/Hnrnpf/Wtap/App/Npm1/Zc3hav1/Ncl/Hnrnpa2b1/Nup98/Hnrnpa3/Cebpg/Srrm2/Rbm5/Zfp36l2/Celf2/Hnrnpab/Dnajb11/Hnrnpm/Ptbp3/Tra2b/Rbm3/Alkbh5/Srsf5/Larp4b/Xrn2/Hnrnpa1/Rbm25/Ik/Luc7l3/Mbnl2/Rbm17/Srrm1/Rock1/Hnrnph1/Tut7/Prpf4b/Prpf8/Slu7/Paip1/Sfpq/Rbm7/Thoc2/Rock2/Ssb/Dhx15/Tardbp/Scaf11/Papola/Bcas2/Srsf7/P…
GO:0072599	GO:0072599	establishment of protein localization to endoplasmic reticulum	18/1310	25/3883	0.000100252	0.0173092	0.0160281	Folr2/Hspa5/Spcs2/Herpud1/Spcs3/Macf1/Srp72/Tram1/Ssr3/Sec62/Rab10/Bag6/Get1/Srp19/Srp54c/Sec63/Srpr/Srprb
GO:0045935	GO:0045935	positive regulation of nucleobase-containing compound metabolic process	199/1310	481/3883	0.000113757	0.0181804	0.0168349	Cd81/Hspa8/Actb/Hsp90ab1/Mmp12/Tcf7l2/Actr2/Slc40a1/Cd38/Klf13/Hsp90aa1/Hsph1/Actr3/Ncoa3/Ddx5/Ptges3/Ptprc/Ywhah/Ifi207/Id2/Snx5/Morf4l1/Pabpc1/Hnrnpk/Sf3b1/Qk/Hexb/Pan3/Csde1/Picalm/Hnrnpu/Mettl3/Nampt/Ifi204/App/Dab2/Spic/Npm1/Cct8/Zeb2/Stat1/Cnbp/Klf6/Zc3hav1/Ncl/Hnrnpa2b1/Cct5/Nup98/Anxa3/Nfe2l2/Arf4/Xbp1/Cebpg/Gsk3b/Cct4/Sub1/Nsd3/Maf/Tcp1/Stat2/Zfp36l2/Il1a/Crebbp/Pcna/Zfp263/Ogt/Hnrnpab/P…
GO:0048812	GO:0048812	neuron projection morphogenesis	70/1310	144/3883	0.00012081	0.0184682	0.0171014	Actb/Hsp90ab1/Actr2/Hsp90aa1/Actr3/Iqgap1/Adam10/Pitpna/Itgb1/Marcks/Ywhah/Myo9a/Ece1/Hnrnpk/Sema6d/Picalm/Clasp2/App/Zeb2/Pmp22/Caprin1/Kif5b/Macf1/Skil/Gsk3b/Sgk1/Septin7/Sh3glb1/Ccr5/Mycbp2/Dpysl2/Sema4b/Evl/Itsn2/Pten/Abi1/Golga4/Ube3a/Mef2a/Rab10/Usp9x/Impact/Taok1/Rock1/Pak1/Nptn/Rufy3/Rock2/Epb41l3/Kidins220/Dst/Ulk2/Nrp1/Ppp3ca/Ptk2/Gdi1/Raph1/Rnf6/Psen1/Pafah1b1/Pak2/Klf7/Egr2/Ptprm/Top2…
GO:0032647	GO:0032647	regulation of interferon-alpha production	13/1310	16/3883	0.000129376	0.0189536	0.0175508	Mmp12/Stat1/Zc3hav1/Hspd1/Tlr7/Ddx3x/Tlr4/Gbp4/Tbk1/Setd2/Tlr8/Ddx58/Ifih1
GO:0010629	GO:0010629	negative regulation of gene expression	144/1310	336/3883	0.000168746	0.0228196	0.0211308	Lgmn/Hsp90ab1/Vsig4/H3f3b/Cd83/Msr1/Cd36/Lilrb4a/Ddx5/Adam10/Lilrb4b/Hfe/Ptprc/Mertk/Tent5a/Atp2b1/Id2/Srgn/Pabpc1/Hnrnpk/Tmem59/Qk/Lilra5/Pan3/Csde1/Picalm/Dnmt3a/Hnrnpu/Notch2/Hspa1a/Mettl3/App/Cbx3/Npm1/Trim30a/Parp14/Tpr/Ndfip1/Pmp22/Caprin1/Zc3hav1/Ncl/Hnrnpa2b1/Cd84/Vps35/C5ar2/Gsk3b/Dapk1/Zfp36l2/Crebbp/Selenos/Celf2/Resf1/Marf1/Hnrnpab/Eif2s1/Hnrnpm/Anxa4/Ptbp3/Tra2b/Bank1/Macroh2a1/Rbm3/…
GO:0031175	GO:0031175	neuron projection development	111/1310	250/3883	0.000189351	0.0246577	0.0228328	Actb/Hsp90ab1/B2m/Hspa5/Actr2/Cd38/Cd44/Twf1/Hsp90aa1/Septin2/Actr3/Iqgap1/Adam10/Pitpna/Itgb1/Marcks/Ywhah/Myo9a/Ece1/Hnrnpk/Qk/Sema6d/Picalm/Clasp2/Manf/App/Dab2/Zeb2/Adam17/Cflar/Pmp22/Caprin1/Zmynd8/Kif5b/Macf1/Skil/Nfe2l2/Arf4/Gsk3b/Sgk1/Septin7/Crebbp/Sh3glb1/Ccr5/Herc1/Mycbp2/Dpysl2/Rap1a/Sema4b/Evl/Itsn2/Nr3c1/Pten/Abi1/Map4/Golga4/Ube3a/Mef2a/Rab10/Usp9x/Impact/Tmem30a/Taok1/Rock1/Pak1/V…
GO:0045047	GO:0045047	protein targeting to ER	17/1310	24/3883	0.000217949	0.0266722	0.0246983	Folr2/Hspa5/Spcs2/Herpud1/Spcs3/Macf1/Srp72/Tram1/Ssr3/Sec62/Bag6/Get1/Srp19/Srp54c/Sec63/Srpr/Srprb
GO:0001819	GO:0001819	positive regulation of cytokine production	85/1310	184/3883	0.000223165	0.0266722	0.0246983	Cd81/B2m/Mmp12/Cd14/Lpl/Fcgr3/Cd83/Hsp90aa1/Cd36/Clec4n/Ptprc/Cadm1/Tmed10/Ifi207/Ifngr1/Atp6ap2/Lilra5/Hspa1a/Rab1a/Ifi204/App/Stat1/Selenok/Adam17/Zc3hav1/Ncl/Mndal/Cd84/Xbp1/Ccl2/Cebpg/Cd1d1/Hspd1/Nras/Oas2/Cd55/Il1a/Rab7b/Ifi205/Pik3r1/Ccl4/Ccr5/Casp1/Tlr1/Tlr7/Ddx3x/Zbtb20/Pde4b/Tlr2/Tlr4/Naip5/Rock2/Tmf1/Egr1/Ifi211/Rsad2/Dennd1b/Pou2f2/Eif2ak2/Peli1/C3ar1/Heg1/Hif1a/Tbk1/Setd2/Cd274/Ifi206…
GO:0048667	GO:0048667	cell morphogenesis involved in neuron differentiation	65/1310	134/3883	0.000227579	0.0266722	0.0246983	Actb/Hsp90ab1/Actr2/Hsp90aa1/Actr3/Adam10/Pitpna/Itgb1/Marcks/Ywhah/Ece1/Id2/Sema6d/Picalm/Clasp2/App/Zeb2/Pmp22/Caprin1/Kif5b/Macf1/Skil/Gsk3b/Sgk1/Septin7/Sh3glb1/Ccr5/Mycbp2/Dpysl2/Sema4b/Evl/Pten/Abi1/Golga4/Ube3a/Mef2a/Rab10/Usp9x/Pak1/Nptn/Rufy3/Rock2/Kidins220/Dst/Myo7a/Ulk2/Nrp1/Ppp3ca/Ptk2/Gdi1/Raph1/Rnf6/Psen1/Pafah1b1/Pak2/Klf7/Egr2/Ptprm/Top2b/Hes1/Tsku/Ptpro/Fyn/Pdlim5/B4galt6
GO:0048858	GO:0048858	cell projection morphogenesis	72/1310	152/3883	0.000266939	0.0284411	0.0263363	Actb/Hsp90ab1/Actr2/Cd44/Hsp90aa1/Actr3/Iqgap1/Adam10/Pitpna/Itgb1/Marcks/Ywhah/Myo9a/Ece1/Hnrnpk/Snx2/Sema6d/Picalm/Clasp2/App/Zeb2/Pmp22/Caprin1/Kif5b/Macf1/Skil/Gsk3b/Sgk1/Septin7/Sh3glb1/Ccr5/Mycbp2/Dpysl2/Sema4b/Evl/Itsn2/Pten/Abi1/Golga4/Ube3a/Mef2a/Rab10/Usp9x/Impact/Taok1/Rock1/Pak1/Nptn/Rufy3/Rock2/Epb41l3/Kidins220/Dst/Ulk2/Nrp1/Ppp3ca/Ptk2/Gdi1/Raph1/Rnf6/Psen1/Pafah1b1/Pak2/Klf7/Egr2/…
GO:0120039	GO:0120039	plasma membrane bounded cell projection morphogenesis	72/1310	152/3883	0.000266939	0.0284411	0.0263363	Actb/Hsp90ab1/Actr2/Cd44/Hsp90aa1/Actr3/Iqgap1/Adam10/Pitpna/Itgb1/Marcks/Ywhah/Myo9a/Ece1/Hnrnpk/Snx2/Sema6d/Picalm/Clasp2/App/Zeb2/Pmp22/Caprin1/Kif5b/Macf1/Skil/Gsk3b/Sgk1/Septin7/Sh3glb1/Ccr5/Mycbp2/Dpysl2/Sema4b/Evl/Itsn2/Pten/Abi1/Golga4/Ube3a/Mef2a/Rab10/Usp9x/Impact/Taok1/Rock1/Pak1/Nptn/Rufy3/Rock2/Epb41l3/Kidins220/Dst/Ulk2/Nrp1/Ppp3ca/Ptk2/Gdi1/Raph1/Rnf6/Psen1/Pafah1b1/Pak2/Klf7/Egr2/…
GO:0006906	GO:0006906	vesicle fusion	25/1310	41/3883	0.00030266	0.0300229	0.027801	Snap23/Rab7/Rab20/Kif5b/Rab7b/Stx7/Arl8b/Uvrag/Pla2g4a/Gnai3/Vti1b/Stx4a/Rab8b/Ankfy1/Vps41/Dysf/Stx3/Samd9l/Eea1/Uso1/Stx12/Vamp3/Gosr1/Vamp4/Rab39
GO:0090174	GO:0090174	organelle membrane fusion	25/1310	41/3883	0.00030266	0.0300229	0.027801	Snap23/Rab7/Rab20/Kif5b/Rab7b/Stx7/Arl8b/Uvrag/Pla2g4a/Gnai3/Vti1b/Stx4a/Rab8b/Ankfy1/Vps41/Dysf/Stx3/Samd9l/Eea1/Uso1/Stx12/Vamp3/Gosr1/Vamp4/Rab39
GO:0120036	GO:0120036	plasma membrane bounded cell projection organization	143/1310	337/3883	0.000309144	0.0300229	0.027801	Actb/Lgmn/Hsp90ab1/B2m/Hspa5/Actr2/Cd38/Cd44/Twf1/Hsp90aa1/Arpc5/Septin2/Actr3/Iqgap1/Adam10/Pitpna/Tcirg1/Itgb1/Marcks/Ywhah/Plek/Myo9a/Ece1/Rpgrip1/Hnrnpk/Snx2/Qk/Sema6d/Picalm/Clasp2/Mapre1/Manf/App/Dab2/Zeb2/Adam17/Cflar/Pmp22/Caprin1/Zmynd8/Kif5b/Macf1/Skil/Nfe2l2/Arf4/Vps35/Gsk3b/Myh9/Sgk1/Septin7/Atp6v1d/Crebbp/Pik3r1/Sh3glb1/Tgfbr1/Ccr5/Herc1/Mycbp2/Dpysl2/Rdx/Rap1a/Sema4b/Cep350/Evl/Itsn…
GO:0032727	GO:0032727	positive regulation of interferon-alpha production	12/1310	15/3883	0.00031594	0.0300229	0.027801	Mmp12/Stat1/Zc3hav1/Hspd1/Tlr7/Ddx3x/Tlr4/Tbk1/Setd2/Tlr8/Ddx58/Ifih1
GO:0061025	GO:0061025	membrane fusion	29/1310	50/3883	0.000343226	0.0310262	0.02873	Folr2/Ctsl/Snap23/Rab7/Rab20/Kif5b/Rab7b/Stx7/Arl8b/Huwe1/Uvrag/Pla2g4a/Gnai3/Vti1b/Stx4a/Myof/Rab8b/Ankfy1/Vps41/Dysf/Stx3/Samd9l/Eea1/Uso1/Stx12/Vamp3/Gosr1/Vamp4/Rab39
GO:0006886	GO:0006886	intracellular protein transport	142/1310	335/3883	0.000344147	0.0310262	0.02873	Cd81/Hspa8/Hsp90ab1/Folr2/Mmp12/Hspa5/Tcf7l2/Lcp1/Hsp90aa1/Cd36/Actr3/Ddx5/Cltc/Spcs2/Lamp2/Itgb1/Marcks/Tmed2/Ywhah/Tmed10/Herpud1/Snx5/Snx2/Pan3/Rab7/M6pr/Ywhaz/Ywhae/Rab1a/Tpr/Rab20/Nup98/Spcs3/Kif5b/Macf1/Rtp4/Srp72/Arf4/Xbp1/Ccl2/Vps35/Txnip/Hspd1/Gsk3b/Ncoa4/Rab14/Derl2/Tram1/Copb2/Selenos/Ogt/Pik3r1/Sh3glb1/Stx7/Hspa9/Copb1/Pola2/Snx6/Vps26a/Ywhaq/Ssr3/Vps26c/Sp100/Sec62/Sel1l/Rab10/Rab2a/…
GO:0035456	GO:0035456	response to interferon-beta	22/1310	35/3883	0.000379216	0.0331231	0.0306717	Gbp2b/Ifi207/Gbp2/Tgtp2/Ifit3/Ifi204/Ifi203/Stat1/Gbp7/Mndal/Gbp3/Ifi205/Gm4951/Irgm1/Irgm2/Iigp1/Ifi209/Ifi211/Ifi47/Igtp/Ifi206/Ifi213
GO:0008380	GO:0008380	RNA splicing	65/1310	136/3883	0.000386247	0.0331231	0.0306717	Hspa8/Ddx5/Srsf2/Pabpc1/Hnrnpk/Sf3b1/Qk/Hnrnpu/Son/Mbnl1/Rbm39/Mettl3/Hnrnpf/Wtap/Npm1/Ncl/Hnrnpa2b1/Nup98/Hnrnpa3/Clk1/Srrm2/Rbm5/Celf2/Pik3r1/Hnrnpm/Ptbp3/Tra2b/Rbm3/Srsf5/Ccnl1/Hnrnpa1/Rbm25/Ik/Ivns1abp/Luc7l3/Mbnl2/Rbm17/Srrm1/Hnrnph1/Prpf4b/Prpf8/Slu7/Sfpq/Rbm7/Thoc2/Hnrnph2/Dhx15/Tardbp/Scaf11/Bcas2/Srsf7/Prpf38b/Srsf1/Srsf10/Ccnl2/Srek1/Khdrbs1/Pnn/Mtrex/Srsf6/Srsf3/Acin1/Ppp4r2/Rsrc1/BC00…
GO:0071346	GO:0071346	cellular response to interferon-gamma	35/1310	64/3883	0.000413092	0.0337774	0.0312777	H2-Ab1/Actr2/Mrc1/Actr3/Cd47/Gbp2b/Gbp2/Gbp8/Stat1/Parp14/Rab20/Gbp7/Kif5b/Ccl2/Dapk1/Gbp3/Rab7b/Ccl4/Casp1/Evl/Ccl7/Irgm1/Tlr2/Tlr4/Stx4a/Gbp4/Igtp/Stxbp3/Eprs/Gbp9/Ccl22/Vamp3/Parp9/Vamp4/Kif16b
GO:0032731	GO:0032731	positive regulation of interleukin-1 beta production	19/1310	29/3883	0.000445797	0.0356232	0.0329869	Lpl/Cd36/Ifi207/Lilra5/Ifi204/App/Mndal/Ifi205/Ccr5/Casp1/Tlr2/Tlr4/Naip5/Egr1/Ifi211/Ifi206/Casp8/Tlr8/Ifnar1
GO:0006458	GO:0006458	'de novo' protein folding	16/1310	23/3883	0.000466575	0.0364551	0.0337571	Hspa8/Hspa5/Hsph1/Sdf2l1/Ptges3/Hspa1a/St13/Sh3glb1/Dnajc7/Hspa9/Hspe1/Selenof/Dnajc2/Sdf2/Cct2/Hspa1b
GO:1903507	GO:1903507	negative regulation of nucleic acid-templated transcription	119/1310	276/3883	0.000480391	0.0367186	0.0340011	Hspa8/Mmp12/Tcf7l2/Sdcbp/Cd38/Cd36/Asah1/Tsc22d3/Lilrb4a/Ddx5/Lilrb4b/Ifi207/Id2/Hnrnpk/Set/Dnmt3a/Hnrnpu/Notch2/Ywhaz/Hbp1/Ifi204/App/Dab2/Cbx3/Zeb2/Tpr/Cnbp/Hnrnpa2b1/Mier1/Eif4a2/Skil/Xbp1/Txnip/Nsd3/Maf/Zbtb4/Foxn3/Crebbp/Pcna/Spop/Zfp263/Pias1/Mtdh/Hnrnpab/Kdm5a/Tgfbr1/Atrx/Snx6/Macroh2a1/Ywhaq/Hipk1/Nr3c1/Bclaf1/Sp100/Cdkn1b/Bptf/Mef2a/Nipbl/Lrrfip1/Atf7ip/Impact/Zbtb20/Ets2/Sarnp/Zbtb38/Tf…
GO:0000003	GO:0000003	reproduction	118/1310	274/3883	0.000536365	0.0392887	0.036381	Ctsb/Vcam1/Hsp90ab1/Folr2/Mmp12/Tcf7l2/Actr2/H3f3b/B4galt1/Cd44/Dnaja1/Septin2/Actr3/Ncoa3/Serpinb6a/Ctsl/Itgb1/Cadm1/Mertk/Tmed2/Vmp1/Selenop/Hnrnpk/Qk/Hexb/Dnmt3a/Notch2/Lrrc8a/Clasp2/Mettl3/App/Cct8/Pmp22/Cct5/Thbd/Clic4/Birc6/Myh9/Cct4/Gsr/Tcp1/Septin7/Il1a/Marf1/Itgav/Tgfbr1/Vdac2/Gnaq/Atrx/Alkbh5/Xrn2/Nr3c1/Pten/Pla2g4a/Cdkn1b/Paip2/Ube3a/Ggnbp2/Bptf/Nipbl/Ddx3x/Ubr2/Hsd17b4/Eif2s2/Ube2b/Ei…
GO:0022414	GO:0022414	reproductive process	116/1310	269/3883	0.000562592	0.0393203	0.0364103	Ctsb/Vcam1/Hsp90ab1/Folr2/Mmp12/Tcf7l2/Actr2/H3f3b/B4galt1/Cd44/Dnaja1/Septin2/Actr3/Ncoa3/Serpinb6a/Ctsl/Itgb1/Cadm1/Mertk/Tmed2/Vmp1/Hnrnpk/Qk/Hexb/Dnmt3a/Notch2/Lrrc8a/Clasp2/Mettl3/App/Cct8/Pmp22/Cct5/Thbd/Clic4/Birc6/Myh9/Cct4/Gsr/Tcp1/Septin7/Il1a/Marf1/Itgav/Tgfbr1/Vdac2/Gnaq/Atrx/Alkbh5/Xrn2/Nr3c1/Pten/Pla2g4a/Cdkn1b/Paip2/Ube3a/Ggnbp2/Bptf/Nipbl/Ddx3x/Ubr2/Hsd17b4/Eif2s2/Ube2b/Eif4g3/Cre…
GO:0016050	GO:0016050	vesicle organization	53/1310	108/3883	0.000599086	0.0405074	0.0375096	Sdcbp/Abcg1/Abca1/Tmed10/Srgn/Picalm/Snap23/Rab7/Rab1a/Zeb2/Rab20/Pdcd6ip/Kif5b/Rab14/Vps4b/Rab7b/Stx7/Arl8b/Uvrag/Pla2g4a/Usp8/Snx10/Insig1/Vapa/Gnai3/Washc4/Vti1b/Tmf1/Stx4a/Myo7a/Synj1/Rab8b/Sar1b/Ankfy1/Vps41/Cd2ap/Dysf/Tsg101/Stx3/Sar1a/Tmem127/Samd9l/Eea1/Uso1/Tmcc1/Pafah1b1/Mia3/Mfsd14a/Stx12/Vamp3/Gosr1/Vamp4/Rab39
GO:0019953	GO:0019953	sexual reproduction	66/1310	141/3883	0.000718619	0.0467835	0.0433212	Folr2/H3f3b/B4galt1/Dnaja1/Septin2/Itgb1/Cadm1/Mertk/Selenop/Qk/Hexb/Dnmt3a/Lrrc8a/Mettl3/Cct8/Pmp22/Cct5/Clic4/Myh9/Cct4/Gsr/Tcp1/Septin7/Marf1/Itgav/Tgfbr1/Vdac2/Atrx/Alkbh5/Xrn2/Pla2g4a/Paip2/Ube3a/Ggnbp2/Ddx3x/Ubr2/Eif2s2/Ube2b/Eif4g3/Crem/Tut7/Tmf1/Hpgds/Bag6/Selenof/Nrip1/Tdrd7/Ube2q1/Ddx3y/Akap9/Arid4a/Htt/Cct2/Xlr/Cnbd2/Lepr/Herc4/Irag2/Hspa1b/Pafah1b1/Mfsd14a/Ash1l/Herc2/Ube2j1/4932438A1…
GO:0045089	GO:0045089	positive regulation of innate immune response	30/1310	54/3883	0.00074513	0.0467835	0.0433212	Mmp12/Hsp90aa1/Clec4n/Cadm1/Ifi207/Ifi204/Ifi203/Trim30a/Vav1/Mndal/Ifi205/Irgm1/Tlr2/Matr3/Tlr4/Sfpq/Ifi209/Ifi211/Igtp/Tbk1/Ifi206/Trim12a/Tlr8/Rasgrp1/Ap1g1/H2-M3/Klrk1/Parp9/Slamf6/Trim56
GO:0001816	GO:0001816	cytokine production	128/1310	303/3883	0.000804946	0.0484484	0.0448629	Cd81/Hsp90ab1/B2m/Mmp12/Vsig4/Cd300ld/Cd14/Lpl/Pld4/Fcgr3/Cd83/Hsp90aa1/Cd36/Lilrb4a/Iqgap1/Clec4n/Lilrb4b/Cd47/Hfe/Ptprc/Tcirg1/Cadm1/Mertk/Tmed10/Atp2b1/Ifi207/Ifngr1/Srgn/Atp6ap2/Lilra5/Notch2/Hspa1a/Rab1a/Ifi204/App/Stat1/Trim30a/Selenok/Adam17/Ndfip1/Zc3hav1/Ncl/Mndal/Cd84/Xbp1/Ccl2/Cebpg/C5ar2/Cd1d1/Hspd1/Nras/Oas2/Maf/Cd55/Il1a/Crebbp/Selenos/Rab7b/Ifi205/Pik3r1/Itgav/Ccl4/Anxa4/Ccr5/Bank1…
GO:0010469	GO:0010469	regulation of signaling receptor activity	19/1310	30/3883	0.000834425	0.0484484	0.0448629	Lilrb4a/Lilrb4b/Hfe/Itgb1/Ifngr1/App/Adam17/Ccl2/Dapk1/Cbl/Pten/Adrb2/Ppp2ca/Klhl24/Hif1a/Tsg101/Akap9/Psen1/Ptprj
GO:0010557	GO:0010557	positive regulation of macromolecule biosynthetic process	183/1310	452/3883	0.000840545	0.0484484	0.0448629	Cd81/Hsp90ab1/Mmp12/Tcf7l2/Actr2/Slc40a1/Cd38/Klf13/Hsp90aa1/Cd36/Hsph1/Actr3/Ncoa3/Ddx5/Ptges3/Ywhah/Ifi207/Id2/Snx5/Hnrnpk/Sf3b1/Hexb/Csde1/Picalm/Soat1/Hnrnpu/Mettl3/Nampt/Serp1/Ifi204/App/Dab2/Spic/Npm1/Cct8/Zeb2/Stat1/Cnbp/Klf6/Mtpn/Ncl/Cct5/Nfe2l2/Arf4/Xbp1/Ccl2/Niban1/Cebpg/Gsk3b/Cct4/Sub1/Nsd3/Maf/Tcp1/Stat2/Dnajc3/Il1a/Crebbp/Pcna/Zfp263/Ogt/Hnrnpab/Pik3r1/Kdm5a/Tgfbr1/Pim1/Atrx/Rbm3/Lar…
GO:0002833	GO:0002833	positive regulation of response to biotic stimulus	38/1310	73/3883	0.000862606	0.0489181	0.0452978	Mmp12/Hsp90aa1/Clec4n/Cadm1/Ifi207/Ifi204/Ifi203/Trim30a/Vav1/Zc3hav1/Mndal/Hspd1/Ifi205/Irgm1/Ankrd17/Ddx60/Tlr2/Matr3/Tlr4/Sfpq/Ifi209/Ly86/Ifi211/Igtp/Tbk1/Cd274/Ifi206/Trim12a/Tlr8/Rasgrp1/Scimp/Sash1/Ap1g1/H2-M3/Klrk1/Parp9/Slamf6/Trim56
GO:0010647	GO:0010647	positive regulation of cell communication	200/1310	499/3883	0.00088089	0.0491621	0.0455237	Cd81/Lgmn/Hsp90ab1/Mmp12/Ctsc/Tcf7l2/Sdcbp/Abcg1/Pdia3/Cd14/Cd38/Cd44/Hsp90aa1/Serinc3/Il1rn/Cd36/Ncoa3/Ddx5/Iqgap1/Cd86/Clec4n/Hfe/Ptprc/Itgb1/Rap1b/Marcks/Ece1/Snx5/Hnrnpk/Atp6ap2/Lilra5/Notch2/Hspa1a/Serp1/App/Dab2/Ctnna1/Wnk1/Zeb2/Trim30a/Parp14/Tpr/Adam17/Cflar/Zc3hav1/Mcl1/Kif5b/Macf1/Skil/Cd84/Xbp1/Ccl2/Vps35/C5ar2/Gsk3b/Mapre2/Oxct1/Cmtm3/Cd300lf/Gpr137b/Il1a/Crebbp/Madd/Gpr65/Spop/Mtdh/P…

## Sheet: plum
	ID	Description	GeneRatio	BgRatio	pvalue	p.adjust	qvalue	geneID	Count	GeneRatio_perc	geneID_SYMBOL
KEGG_RIBOSOME	KEGG_RIBOSOME	KEGG_RIBOSOME	59/187	76/1581	1.7824e-43	2.15671e-41	2.15671e-41	76808/11837/16785/16898/56040/22121/67891/19988/19921/19951/27050/76846/27367/20085/20102/20103/20091/19989/20084/20005/27207/19941/20115/110954/20104/68436/26961/54127/20088/27176/19933/67115/268449/66480/319195/67186/67097/22186/267019/68193/54217/57808/20068/67427/27370/68052/19896/66475/14109/19944/65019/67248/67281/66483/26451/19982/66481/19934/68028	59	0.3155	Rpl18a/Rplp0/Rpsa/Rps2/Rplp1/Rpl13a/Rpl4/Rpl6/Rpl19/Rpl32/Rps3/Rps9/Rpl3/Rps19/Rps4x/Rps5/Rps3a1/Rpl7/Rps18/Rpl9/Rps11/Rpl26/Rps7/Rpl10/Rps6/Rpl34/Rpl8/Rps28/Rps24/Rpl7a/Rpl21/Rpl14/Rpl23a/Rpl15/Rpl17/Rplp2/Rps10/Uba52/Rps15a/Rpl24/Rpl36/Rpl35a/Rps17/Rps20/Rps26/Rps13/Rpl10a/Rps23/Fau/Rpl29/Rpl23/Rpl39/Rpl37/Rpl36al/Rpl27a/Rpl36a/Rps21/Rpl22/Rpl22l1
HALLMARK_OXIDATIVE_PHOSPHORYLATION	HALLMARK_OXIDATIVE_PHOSPHORYLATION	HALLMARK_OXIDATIVE_PHOSPHORYLATION	24/143	142/1607	0.000986735	0.0230144	0.0207649	11947/625249/11946/12861/110323/113868/11949/71679/66043/11429/15929/66142/66445/66052/67530/108664/14719/93747/67003/11950/68197/269951/12028/69833	24	0.1678	Atp5b/Gpx4/Atp5a1/Cox6a1/Cox6b1/Acaa1a/Atp5c1/Atp5h/Atp5d/Aco2/Idh3g/Cox7b/Cyc1/Sdhc/Uqcrb/Atp6v1h/Got2/Echs1/Uqcrc2/Atp5pb/Ndufc2/Idh2/Bax/Polr2f
HALLMARK_MYC_TARGETS_V1	HALLMARK_MYC_TARGETS_V1	HALLMARK_MYC_TARGETS_V1	24/143	143/1607	0.00109592	0.0230144	0.0207649	11837/268373/16898/19988/27050/20103/20104/68436/67115/67097/55949/19166/15452/15381/19934/66445/26441/23918/53605/233870/14719/20639/21849/20174	24	0.1678	Rplp0/Ppia/Rps2/Rpl6/Rps3/Rps5/Rps6/Rpl34/Rpl14/Rps10/Eef1b2/Psma2/Hprt/Hnrnpc/Rpl22/Cyc1/Psma4/Impdh2/Nap1l1/Tufm/Got2/Snrpb2/Trim28/Ruvbl2
GO:0006412	GO:0006412	translation	79/355	268/3883	1.73322e-23	4.95007e-20	4.95007e-20	Rpl18a/Rplp0/Eef2/Rpsa/Eef1a1/Rps2/Rplp1/Rpl41/Rpl13a/Rpl4/Rpl6/Rpl19/Rpl32/Rps3/Rps9/Rpl3/Rps19/Rps4x/Rps5/Rps3a1/Rpl7/Rps18/Rpl9/Rps11/Rpl26/Rps7/Rpl10/Rpl8/Eef1g/Rps28/Rps24/Rpl21/Rpl14/Rpl23a/Rpl15/Rpl17/Rplp2/Eif3f/Rpl24/Rpl36/Rpl35a/Rps17/Rps20/Rps26/Rps13/Rpl10a/Rps23/Eef1b2/Igf1/Fau/Rpl29/Rpl23/Rpl39/Rpl37/Rpl37rt/Eif4ebp1/Eif3h/Eif3k/Rpl36al/Rpl27a/Rpl36a/Rps21/Rpl22/Eef1d/Eif3i/Eif4b/Dd…
GO:0043043	GO:0043043	peptide biosynthetic process	79/355	273/3883	6.57036e-23	9.38248e-20	9.38248e-20	Rpl18a/Rplp0/Eef2/Rpsa/Eef1a1/Rps2/Rplp1/Rpl41/Rpl13a/Rpl4/Rpl6/Rpl19/Rpl32/Rps3/Rps9/Rpl3/Rps19/Rps4x/Rps5/Rps3a1/Rpl7/Rps18/Rpl9/Rps11/Rpl26/Rps7/Rpl10/Rpl8/Eef1g/Rps28/Rps24/Rpl21/Rpl14/Rpl23a/Rpl15/Rpl17/Rplp2/Eif3f/Rpl24/Rpl36/Rpl35a/Rps17/Rps20/Rps26/Rps13/Rpl10a/Rps23/Eef1b2/Igf1/Fau/Rpl29/Rpl23/Rpl39/Rpl37/Rpl37rt/Eif4ebp1/Eif3h/Eif3k/Rpl36al/Rpl27a/Rpl36a/Rps21/Rpl22/Eef1d/Eif3i/Eif4b/Dd…
GO:0006518	GO:0006518	peptide metabolic process	88/355	338/3883	4.54986e-22	3.2486e-19	3.2486e-19	Gpx1/Rpl18a/Rplp0/Eef2/Rpsa/Eef1a1/Rps2/Rplp1/Rpl41/Rpl13a/Rpl4/Rpl6/Rpl19/Rpl32/Rps3/Rps9/Rpl3/Rps19/Rps4x/Rps5/Rps3a1/Rpl7/Rps18/Rpl9/Ctsh/Rps11/Rpl26/Rps7/Rpl10/Rpl8/Gstm1/Eef1g/Rps28/Rps24/Gpx4/Rpl21/Rpl14/Rpl23a/Rpl15/Clic1/Rpl17/Rplp2/Eif3f/Rpl24/Rpl36/Rpl35a/Rps17/Rps20/Rps26/Rps13/Rpl10a/Rps23/Eef1b2/Igf1/Fau/Rpl29/Rpl23/Rpl39/Rpl37/Rpl37rt/Eif4ebp1/Eif3h/Eif3k/Rpl36al/Sod2/Rpl27a/Rpl36a/…
GO:0043604	GO:0043604	amide biosynthetic process	79/355	304/3883	1.16339e-19	6.64526e-17	6.64526e-17	Rpl18a/Rplp0/Eef2/Rpsa/Eef1a1/Rps2/Rplp1/Rpl41/Rpl13a/Rpl4/Rpl6/Rpl19/Rpl32/Rps3/Rps9/Rpl3/Rps19/Rps4x/Rps5/Rps3a1/Rpl7/Rps18/Rpl9/Rps11/Rpl26/Rps7/Rpl10/Rpl8/Eef1g/Rps28/Rps24/Rpl21/Rpl14/Rpl23a/Rpl15/Rpl17/Rplp2/Eif3f/Rpl24/Rpl36/Rpl35a/Rps17/Rps20/Rps26/Rps13/Rpl10a/Rps23/Eef1b2/Igf1/Fau/Rpl29/Rpl23/Rpl39/Rpl37/Rpl37rt/Eif4ebp1/Eif3h/Eif3k/Rpl36al/Rpl27a/Rpl36a/Rps21/Rpl22/Eef1d/Eif3i/Eif4b/Dd…
GO:0043603	GO:0043603	cellular amide metabolic process	91/355	421/3883	7.02251e-17	3.34271e-14	3.34271e-14	Gpx1/Rpl18a/Rplp0/Eef2/Rpsa/Eef1a1/Rps2/Rplp1/Rpl41/Rpl13a/Rpl4/Rpl6/Rpl19/Rpl32/Rps3/Rps9/Rpl3/Rps19/Rps4x/Smpdl3a/Rps5/Rps3a1/Rpl7/Rps18/Rpl9/Ctsh/Rps11/Rpl26/Rps7/Rpl10/Rpl8/Gstm1/Eef1g/Rps28/Rps24/Gpx4/Rpl21/Rpl14/Rpl23a/Rpl15/Clic1/Rpl17/Rplp2/Eif3f/Rpl24/Rpl36/Rpl35a/Rps17/Rps20/Rps26/Rps13/Rpl10a/Rps23/Eef1b2/Igf1/Fau/Rpl29/Rpl23/Rpl39/Rpl37/Rpl37rt/Eif4ebp1/Eif3h/Eif3k/Rpl36al/Sod2/Rpl27a…
GO:0034645	GO:0034645	cellular macromolecule biosynthetic process	83/355	373/3883	3.88708e-16	1.58593e-13	1.58593e-13	Rpl18a/Rplp0/Eef2/Rpsa/Eef1a1/Rps2/Rplp1/Rpl41/Rpl13a/Rpl4/Rpl6/Rpl19/Rpl32/Rps3/Rps9/Rpl3/Rps19/Rps4x/Rps5/Rps3a1/Rpl7/Rps18/Rpl9/Rps11/Rpl26/Rps7/Rpl10/Rpl8/Eef1g/Rps28/Rps24/Rpl21/Rpl14/Rpl23a/Rpl15/Rpl17/Rplp2/Eif3f/Rpl24/Rpl36/Rpl35a/Rps17/Rps20/Rps26/Rps13/Rpl10a/Rps23/Eef1b2/Igf1/Fau/Rpl29/Trex1/Rpl23/Rpl39/Rpl37/Rpl37rt/Eif4ebp1/Eif3h/Eif3k/Rpl36al/Rpl27a/Rpl36a/Rps21/Rpl22/Eef1d/Eif3i/Ei…
GO:0022613	GO:0022613	ribonucleoprotein complex biogenesis	39/355	142/3883	9.40738e-11	3.35843e-08	3.35843e-08	Rplp0/Rpsa/Rps2/Rpl13a/Rpl6/Rpl3/Rps19/Rps5/Rpl7/Rpl26/Rps7/Rpl10/Rps6/Rps28/Rps24/Rpl7a/Rpl14/Rpl23a/Snrpb/Rpl24/Rpl35a/Rps17/Rpl10a/Rps21/Nop10/Imp4/Eif4b/Ddx39b/Denr/Rbfa/Traf7/Mrpl20/Ruvbl2/Gemin7/Strap/Sart1/Lsm6/Taf9/Prmt7
GO:0022618	GO:0022618	ribonucleoprotein complex assembly	23/355	71/3883	2.77559e-08	7.92708e-06	7.92708e-06	Rplp0/Rpsa/Rps2/Rpl13a/Rpl6/Rpl3/Rps19/Rps5/Rpl10/Rps28/Rpl23a/Snrpb/Rpl24/Eif4b/Ddx39b/Denr/Traf7/Mrpl20/Ruvbl2/Gemin7/Strap/Taf9/Prmt7
GO:0071826	GO:0071826	ribonucleoprotein complex subunit organization	23/355	74/3883	6.66948e-08	1.73164e-05	1.73164e-05	Rplp0/Rpsa/Rps2/Rpl13a/Rpl6/Rpl3/Rps19/Rps5/Rpl10/Rps28/Rpl23a/Snrpb/Rpl24/Eif4b/Ddx39b/Denr/Traf7/Mrpl20/Ruvbl2/Gemin7/Strap/Taf9/Prmt7
GO:0042255	GO:0042255	ribosome assembly	13/355	31/3883	1.12849e-06	0.00024792	0.00024792	Rplp0/Rpsa/Rps2/Rpl6/Rpl3/Rps19/Rps5/Rpl10/Rps28/Rpl23a/Rpl24/Traf7/Mrpl20
GO:0000027	GO:0000027	ribosomal large subunit assembly	8/355	14/3883	8.29916e-06	0.00169303	0.00169303	Rplp0/Rpl6/Rpl3/Rpl10/Rpl23a/Rpl24/Traf7/Mrpl20
GO:0006364	GO:0006364	rRNA processing	18/355	69/3883	2.85144e-05	0.00508981	0.00508981	Rps19/Rpl7/Rpl26/Rps7/Rps6/Rps28/Rps24/Rpl7a/Rpl14/Rpl35a/Rps17/Rpl10a/Rps21/Nop10/Imp4/Rbfa/Sart1/Lsm6
GO:0042776	GO:0042776	proton motive force-driven mitochondrial ATP synthesis	7/355	14/3883	9.8095e-05	0.0155644	0.0155644	Atp5b/Atp5a1/Atp5c1/Atp5h/Atp5d/Atp5pb/Antkmt
GO:0034470	GO:0034470	ncRNA processing	22/355	103/3883	0.000107022	0.0160872	0.0160872	Rps19/Rpl7/Rpl26/Rps7/Rps6/Rps28/Rps24/Rpl7a/Rpl14/Rpl35a/Rps17/Rpl10a/Rps21/Nop10/Imp4/Tsen34/Rtraf/2210016F16Rik/Osgep/Rbfa/Sart1/Lsm6
GO:0045333	GO:0045333	cellular respiration	24/355	119/3883	0.000136163	0.0185219	0.0185219	Atp5b/Chchd2/Atp5a1/Cox6a1/Oas1a/Atp5c1/Trex1/Atp5h/Atp5d/Sod2/Aco2/Idh3g/Ndufa10/Cyc1/Mtch2/Sdhc/Uqcrb/Atp5pb/Ndufc2/Pink1/Idh2/Bax/Adsl/Antkmt
GO:0016072	GO:0016072	rRNA metabolic process	18/355	77/3883	0.00013619	0.0185219	0.0185219	Rps19/Rpl7/Rpl26/Rps7/Rps6/Rps28/Rps24/Rpl7a/Rpl14/Rpl35a/Rps17/Rpl10a/Rps21/Nop10/Imp4/Rbfa/Sart1/Lsm6

## Sheet: lightgreen
	ID	Description	GeneRatio	BgRatio	pvalue	p.adjust	qvalue	geneID	Count	GeneRatio_perc	geneID_SYMBOL
KEGG_COMPLEMENT_AND_COAGULATION_CASCADES	KEGG_COMPLEMENT_AND_COAGULATION_CASCADES	KEGG_COMPLEMENT_AND_COAGULATION_CASCADES	25/209	39/1581	8.06166e-14	7.49734e-12	6.10989e-12	20704/110135/20701/11905/99571/12266/14061/14161/14962/14058/69379/18816/19123/18815/12258/12279/58992/110382/15160/230558/12269/385643/12630/17175/15139	25	0.1196	Serpina1e/Fgb/Serpina1b/Serpinc1/Fgg/C3/F2/Fga/Cfb/F10/C8g/Serpinf2/Proc/Plg/Serping1/C9/F12/C8b/Serpind1/C8a/C4bp/Kng2/Cfi/Masp2/Hc
KEGG_OXIDATIVE_PHOSPHORYLATION	KEGG_OXIDATIVE_PHOSPHORYLATION	KEGG_OXIDATIVE_PHOSPHORYLATION	38/209	100/1581	7.34511e-11	3.41547e-09	2.78341e-09	17708/17710/17711/17705/17716/17719/17709/17721/17717/17706/17720/17722/17718/66594/12857/22273/66144/17991/66152/66091/225887/11951/78330/27425/75406/66576/54405/68198/66218/69875/66945/407785/17995/70316/66694/67130/595136/67895	38	0.1818	COX1/COX3/CYTB/ATP6/ND1/ND4/COX2/ND5/ND2/ATP8/ND4L/ND6/ND3/Uqcr11/Cox4i1/Uqcrc1/Atp6v1f/Ndufa2/Uqcr10/Ndufa3/Ndufs8/Atp5g1/Ndufv3/Atp5l/Ndufs7/Uqcrh/Ndufa1/Ndufb2/Ndufb9/Ndufa11/Sdha/Ndufs6/Ndufv1/Ndufab1/Uqcrfs1/Ndufa6/Ndufs5/Ppa1
KEGG_PARKINSONS_DISEASE	KEGG_PARKINSONS_DISEASE	KEGG_PARKINSONS_DISEASE	34/209	92/1581	2.08066e-09	6.45005e-08	5.25641e-08	17708/17710/17711/17705/17716/17719/17709/17721/17717/17706/17720/17722/17718/66594/12857/22273/17991/66152/66091/225887/11951/78330/75406/66576/54405/68198/66218/66945/407785/17995/70316/66694/67130/595136	34	0.1627	COX1/COX3/CYTB/ATP6/ND1/ND4/COX2/ND5/ND2/ATP8/ND4L/ND6/ND3/Uqcr11/Cox4i1/Uqcrc1/Ndufa2/Uqcr10/Ndufa3/Ndufs8/Atp5g1/Ndufv3/Ndufs7/Uqcrh/Ndufa1/Ndufb2/Ndufb9/Sdha/Ndufs6/Ndufv1/Ndufab1/Uqcrfs1/Ndufa6/Ndufs5
KEGG_METABOLISM_OF_XENOBIOTICS_BY_CYTOCHROME_P450	KEGG_METABOLISM_OF_XENOBIOTICS_BY_CYTOCHROME_P450	KEGG_METABOLISM_OF_XENOBIOTICS_BY_CYTOCHROME_P450	14/209	20/1581	6.2437e-09	1.45166e-07	1.18302e-07	14870/11522/13106/56615/83702/13107/14874/14859/231396/71773/13077/394436/13112/26876	14	0.067	Gstp1/Adh1/Cyp2e1/Mgst1/Akr1c6/Cyp2f2/Gstz1/Gsta3/Ugt2b36/Ugt2b1/Cyp1a2/Ugt1a1/Cyp3a11/Adh4
KEGG_DRUG_METABOLISM_CYTOCHROME_P450	KEGG_DRUG_METABOLISM_CYTOCHROME_P450	KEGG_DRUG_METABOLISM_CYTOCHROME_P450	13/209	18/1581	1.24991e-08	2.32483e-07	1.8946e-07	14870/11522/13106/56615/14874/14859/231396/71773/13077/14263/394436/13112/26876	13	0.0622	Gstp1/Adh1/Cyp2e1/Mgst1/Gstz1/Gsta3/Ugt2b36/Ugt2b1/Cyp1a2/Fmo5/Ugt1a1/Cyp3a11/Adh4
KEGG_PEROXISOME	KEGG_PEROXISOME	KEGG_PEROXISOME	17/209	38/1581	1.38399e-06	2.14519e-05	1.7482e-05	20655/12359/20280/11430/51798/16922/15356/13850/74114/26458/19299/26378/11611/17117/28200/56794/111175	17	0.0813	Sod1/Cat/Scp2/Acox1/Ech1/Phyh/Hmgcl/Ephx2/Crot/Slc27a2/Abcd3/Decr2/Agxt/Amacr/Dhrs4/Hacl1/Pecr
KEGG_STEROID_HORMONE_BIOSYNTHESIS	KEGG_STEROID_HORMONE_BIOSYNTHESIS	KEGG_STEROID_HORMONE_BIOSYNTHESIS	8/209	10/1581	2.93139e-06	3.89456e-05	3.17383e-05	12846/83702/231396/71773/15483/394436/13112/15494	8	0.0383	Comt/Akr1c6/Ugt2b36/Ugt2b1/Hsd11b1/Ugt1a1/Cyp3a11/Hsd3b3
KEGG_ALZHEIMERS_DISEASE	KEGG_ALZHEIMERS_DISEASE	KEGG_ALZHEIMERS_DISEASE	30/209	101/1581	5.16173e-06	6.00051e-05	4.89006e-05	17708/17710/17711/17705/17709/11816/17706/66594/12857/22273/17991/66152/66091/225887/11951/15108/78330/75406/66576/54405/68198/66218/66945/407785/19165/17995/70316/66694/67130/595136	30	0.1435	COX1/COX3/CYTB/ATP6/COX2/Apoe/ATP8/Uqcr11/Cox4i1/Uqcrc1/Ndufa2/Uqcr10/Ndufa3/Ndufs8/Atp5g1/Hsd17b10/Ndufv3/Ndufs7/Uqcrh/Ndufa1/Ndufb2/Ndufb9/Sdha/Ndufs6/Psen2/Ndufv1/Ndufab1/Uqcrfs1/Ndufa6/Ndufs5
KEGG_RETINOL_METABOLISM	KEGG_RETINOL_METABOLISM	KEGG_RETINOL_METABOLISM	8/209	11/1581	9.53016e-06	9.84784e-05	8.0254e-05	11522/231396/71773/13077/394436/28200/13112/26876	8	0.0383	Adh1/Ugt2b36/Ugt2b1/Cyp1a2/Ugt1a1/Dhrs4/Cyp3a11/Adh4
KEGG_HUNTINGTONS_DISEASE	KEGG_HUNTINGTONS_DISEASE	KEGG_HUNTINGTONS_DISEASE	30/209	109/1581	2.81899e-05	0.000262166	0.00021365	17708/17710/17711/17705/17709/17706/20655/66594/12857/22273/17991/66152/66091/225887/11951/78330/75406/66576/54405/68198/66218/66945/407785/17995/70316/20022/66694/67130/595136/66491	30	0.1435	COX1/COX3/CYTB/ATP6/COX2/ATP8/Sod1/Uqcr11/Cox4i1/Uqcrc1/Ndufa2/Uqcr10/Ndufa3/Ndufs8/Atp5g1/Ndufv3/Ndufs7/Uqcrh/Ndufa1/Ndufb2/Ndufb9/Sdha/Ndufs6/Ndufv1/Ndufab1/Polr2j/Uqcrfs1/Ndufa6/Ndufs5/Polr2l
KEGG_TYROSINE_METABOLISM	KEGG_TYROSINE_METABOLISM	KEGG_TYROSINE_METABOLISM	8/209	13/1581	5.84647e-05	0.000494292	0.000402819	11522/15445/12846/234724/14085/14874/15233/26876	8	0.0383	Adh1/Hpd/Comt/Tat/Fah/Gstz1/Hgd/Adh4
KEGG_PPAR_SIGNALING_PATHWAY	KEGG_PPAR_SIGNALING_PATHWAY	KEGG_PPAR_SIGNALING_PATHWAY	13/209	35/1581	0.000265757	0.00205962	0.00167846	11806/11807/14080/11814/20280/66113/15360/13167/11430/18534/26459/26458/13124	13	0.0622	Apoa1/Apoa2/Fabp1/Apoc3/Scp2/Apoa5/Hmgcs2/Dbi/Acox1/Pck1/Slc27a5/Slc27a2/Cyp8b1
KEGG_CARDIAC_MUSCLE_CONTRACTION	KEGG_CARDIAC_MUSCLE_CONTRACTION	KEGG_CARDIAC_MUSCLE_CONTRACTION	10/209	30/1581	0.00356235	0.0254845	0.0207684	17708/17710/17711/17709/66594/12857/22273/66152/66576/66694	10	0.0478	COX1/COX3/CYTB/COX2/Uqcr11/Cox4i1/Uqcrc1/Uqcr10/Uqcrh/Uqcrfs1
KEGG_TRYPTOPHAN_METABOLISM	KEGG_TRYPTOPHAN_METABOLISM	KEGG_TRYPTOPHAN_METABOLISM	7/209	17/1581	0.00385188	0.0255875	0.0208523	12359/107766/270076/21743/13077/56720/15107	7	0.0335	Cat/Haao/Gcdh/Inmt/Cyp1a2/Tdo2/Hadh
KEGG_PORPHYRIN_AND_CHLOROPHYLL_METABOLISM	KEGG_PORPHYRIN_AND_CHLOROPHYLL_METABOLISM	KEGG_PORPHYRIN_AND_CHLOROPHYLL_METABOLISM	6/209	15/1581	0.00883198	0.0547583	0.0446247	12870/11655/231396/71773/17025/394436	6	0.0287	Cp/Alas1/Ugt2b36/Ugt2b1/Alad/Ugt1a1
KEGG_CYSTEINE_AND_METHIONINE_METABOLISM	KEGG_CYSTEINE_AND_METHIONINE_METABOLISM	KEGG_CYSTEINE_AND_METHIONINE_METABOLISM	6/209	16/1581	0.0126026	0.0732526	0.0596965	12116/234724/11720/269378/12583/12411	6	0.0287	Bhmt/Tat/Mat1a/Ahcy/Cdo1/Cbs
KEGG_DRUG_METABOLISM_OTHER_ENZYMES	KEGG_DRUG_METABOLISM_OTHER_ENZYMES	KEGG_DRUG_METABOLISM_OTHER_ENZYMES	6/209	17/1581	0.0173757	0.0950554	0.0774645	231396/71773/104158/394436/103149/13112	6	0.0287	Ugt2b36/Ugt2b1/Ces1d/Ugt1a1/Upb1/Cyp3a11
KEGG_VALINE_LEUCINE_AND_ISOLEUCINE_DEGRADATION	KEGG_VALINE_LEUCINE_AND_ISOLEUCINE_DEGRADATION	KEGG_VALINE_LEUCINE_AND_ISOLEUCINE_DEGRADATION	7/209	22/1581	0.0188683	0.097486	0.0794453	52538/15360/15108/15356/12039/58875/15107	7	0.0335	Acaa2/Hmgcs2/Hsd17b10/Hmgcl/Bckdha/Hibadh/Hadh
HALLMARK_XENOBIOTIC_METABOLISM	HALLMARK_XENOBIOTIC_METABOLISM	HALLMARK_XENOBIOTIC_METABOLISM	47/226	105/1607	1.63861e-15	7.70147e-14	6.38196e-14	11816/14080/14711/22370/11522/13106/19662/14962/12359/16427/109672/14058/12846/14121/234724/29811/11655/11430/83702/269378/14085/51798/11846/18815/94175/16424/109900/16010/14859/59083/74114/12944/13202/12583/13077/16816/56720/20517/15483/30924/104158/18618/103149/56794/22235/53328/54426	47	0.208	Apoe/Fabp1/Gnmt/Vtn/Adh1/Cyp2e1/Rbp4/Cfb/Cat/Itih4/Cyb5a/F10/Comt/Fbp1/Tat/Ndrg2/Alas1/Acox1/Akr1c6/Ahcy/Fah/Ech1/Arg1/Plg/Hrg/Itih1/Asl/Igfbp4/Gsta3/Fetub/Crot/Crp/Ddt/Cdo1/Cyp1a2/Lcat/Tdo2/Slc22a1/Hsd11b1/Angptl3/Ces1d/Pemt/Upb1/Hacl1/Ugdh/Pgrmc1/Hgfac
HALLMARK_COAGULATION	HALLMARK_COAGULATION	HALLMARK_COAGULATION	35/226	71/1607	3.15957e-13	7.425e-12	6.15286e-12	22041/11806/20704/20701/11812/11905/99571/12266/14061/12759/14161/14962/11814/15360/14058/69379/68337/19123/18815/94175/12258/16424/12279/14268/58992/11813/110382/66901/230558/19733/12630/17175/71753/93721/15451	35	0.1549	Trf/Apoa1/Serpina1e/Serpina1b/Apoc1/Serpinc1/Fgg/C3/F2/Clu/Fga/Cfb/Apoc3/Hmgcs2/F10/C8g/Crip2/Proc/Plg/Hrg/Serping1/Itih1/C9/Fn1/F12/Apoc2/C8b/Proz/C8a/Rgn/Cfi/Masp2/Tmprss6/Cpn1/Hpn
HALLMARK_BILE_ACID_METABOLISM	HALLMARK_BILE_ACID_METABOLISM	HALLMARK_BILE_ACID_METABOLISM	20/226	43/1607	1.98583e-07	3.11113e-06	2.5781e-06	11806/20655/14473/22139/14711/12359/20280/16922/26459/13850/74114/26458/19299/11611/17117/56794/111175/15494/13124/67452	20	0.0885	Apoa1/Sod1/Gc/Ttr/Gnmt/Cat/Scp2/Phyh/Slc27a5/Ephx2/Crot/Slc27a2/Abcd3/Agxt/Amacr/Hacl1/Pecr/Hsd3b3/Cyp8b1/Pnpla8
HALLMARK_FATTY_ACID_METABOLISM	HALLMARK_FATTY_ACID_METABOLISM	HALLMARK_FATTY_ACID_METABOLISM	24/226	88/1607	0.000604071	0.0060879	0.00504484	14080/11522/52538/15360/17449/11430/15108/51798/11758/14874/15356/52683/66945/11370/270076/21743/56720/17025/20194/14194/70335/76238/15107/22235	24	0.1062	Fabp1/Adh1/Acaa2/Hmgcs2/Mdh1/Acox1/Hsd17b10/Ech1/Prdx6/Gstz1/Hmgcl/Ncaph2/Sdha/Acadvl/Gcdh/Inmt/Tdo2/Alad/S100a10/Fh1/Reep6/Grhpr/Hadh/Ugdh
HALLMARK_OXIDATIVE_PHOSPHORYLATION	HALLMARK_OXIDATIVE_PHOSPHORYLATION	HALLMARK_OXIDATIVE_PHOSPHORYLATION	34/226	142/1607	0.000647649	0.0060879	0.00504484	66594/12857/110826/22273/66144/17991/52538/109672/66152/66091/225887/11951/17449/11655/15108/51798/18242/27425/75406/66576/54405/16922/68198/66945/407785/11370/17995/12039/70316/66694/55951/67130/14194/67994	34	0.1504	Uqcr11/Cox4i1/Etfb/Uqcrc1/Atp6v1f/Ndufa2/Acaa2/Cyb5a/Uqcr10/Ndufa3/Ndufs8/Atp5g1/Mdh1/Alas1/Hsd17b10/Ech1/Oat/Atp5l/Ndufs7/Uqcrh/Ndufa1/Phyh/Ndufb2/Sdha/Ndufs6/Acadvl/Ndufv1/Bckdha/Ndufab1/Uqcrfs1/Mpc1/Ndufa6/Fh1/Mrps11
HALLMARK_CHOLESTEROL_HOMEOSTASIS	HALLMARK_CHOLESTEROL_HOMEOSTASIS	HALLMARK_CHOLESTEROL_HOMEOSTASIS	10/226	28/1607	0.00319752	0.0217453	0.0180196	12759/11747/66102/51798/74155/110196/12411/66071/13595/26876	10	0.0442	Clu/Anxa5/Cxcl16/Ech1/Errfi1/Fdps/Cbs/Ethe1/Ebp/Adh4
HALLMARK_KRAS_SIGNALING_DN	HALLMARK_KRAS_SIGNALING_DN	HALLMARK_KRAS_SIGNALING_DN	9/226	24/1607	0.00351654	0.0217453	0.0180196	16426/71773/16008/76257/67426/14431/217847/15139/71279	9	0.0398	Itih3/Ugt2b1/Igfbp2/Slc38a3/Coq8a/Gamt/Serpina10/Hc/Slc29a3
HALLMARK_ESTROGEN_RESPONSE_LATE	HALLMARK_ESTROGEN_RESPONSE_LATE	HALLMARK_ESTROGEN_RESPONSE_LATE	16/226	57/1607	0.00370133	0.0217453	0.0180196	20714/20704/20701/110826/15360/11898/20322/16010/20202/20716/20717/26458/22117/53314/22235/80888	16	0.0708	Serpina3k/Serpina1e/Serpina1b/Etfb/Hmgcs2/Ass1/Sord/Igfbp4/S100a9/Serpina3n/Serpina3m/Slc27a2/Tst/Batf/Ugdh/Hspb8
HALLMARK_ADIPOGENESIS	HALLMARK_ADIPOGENESIS	HALLMARK_ADIPOGENESIS	26/226	115/1607	0.00679958	0.0355089	0.0294251	11816/20655/66594/12266/110826/22273/12359/20280/52538/66152/103172/11430/14085/18405/51798/16922/13850/12039/16880/70316/13202/22117/70335/18618/15107/80888	26	0.115	Apoe/Sod1/Uqcr11/C3/Etfb/Uqcrc1/Cat/Scp2/Acaa2/Uqcr10/Chchd10/Acox1/Fah/Orm1/Ech1/Phyh/Ephx2/Bckdha/Lifr/Ndufab1/Ddt/Tst/Reep6/Pemt/Hadh/Hspb8
HALLMARK_PEROXISOME	HALLMARK_PEROXISOME	HALLMARK_PEROXISOME	14/226	54/1607	0.0137345	0.0645521	0.0534922	11657/20655/22139/12359/20280/12257/11430/51798/15356/13850/110196/71773/26458/19299	14	0.0619	Alb/Sod1/Ttr/Cat/Scp2/Tspo/Acox1/Ech1/Hmgcl/Ephx2/Fdps/Ugt2b1/Slc27a2/Abcd3
GO:0006082	GO:0006082	organic acid metabolic process	116/461	330/3883	9.80159e-32	2.76307e-28	2.58762e-28	Apoa1/Gstp1/Fabp1/Apoc1/Gnmt/Bhmt/C3/Adh1/Cyp2e1/Ces1c/Acaa1b/Apoc3/Etfb/Aldob/Elovl3/Scp2/Acaa2/Apoa5/Cyb5a/Cyp2d10/Uox/Ass1/Hpd/Dbi/Cyp2d9/Comt/Fbp1/Tat/Nudt7/Mat1a/Pon1/Mdh1/Acox1/Akr1c6/Ahcy/Fah/Aldh1l1/Cyp2f2/Hsd17b10/Ech1/Haao/Oat/Pck1/Gstz1/Agt/Sephs2/Arg1/Cyp2d26/Phyh/Hmgcl/Slc27a5/Aldh1a1/Asl/Cps1/Cyp4f18/Sdha/Ttc36/Hagh/Ndufs6/Ephx2/Ces2a/Apoc2/Hgd/Cyp2c29/Acadvl/Gcdh/Glo1/Bckdha/Ces2e/…
GO:0044282	GO:0044282	small molecule catabolic process	55/461	127/3883	8.49658e-20	5.45553e-17	5.10912e-17	Apoe/Fabp1/Adh1/Acaa1b/Etfb/Aldob/Scp2/Acaa2/Uox/Hpd/Dbi/Tat/Nudt7/Mat1a/Pon1/Acox1/Ahcy/Fah/Aldh1l1/Hsd17b10/Oat/Pck1/Gstz1/Sord/Arg1/Phyh/Hmgcl/Cyp4f18/Hagh/Hgd/Acadvl/Gcdh/Glo1/Bckdha/Crot/Cdo1/Pah/Slc27a2/Abcd3/Tdo2/Cbs/Uroc1/Urah/Ces1d/Ces1f/Agxt/Sult2a8/Hibadh/Ftcd/Hadh/Upb1/Hacl1/Amdhd1/Sardh/Adh4
GO:0016054	GO:0016054	organic acid catabolic process	45/461	89/3883	1.16116e-19	5.45553e-17	5.10912e-17	Fabp1/Acaa1b/Etfb/Scp2/Acaa2/Hpd/Dbi/Tat/Nudt7/Mat1a/Pon1/Acox1/Ahcy/Fah/Aldh1l1/Hsd17b10/Oat/Pck1/Gstz1/Arg1/Phyh/Hmgcl/Cyp4f18/Hgd/Acadvl/Gcdh/Bckdha/Crot/Cdo1/Pah/Slc27a2/Abcd3/Tdo2/Cbs/Uroc1/Ces1d/Ces1f/Agxt/Sult2a8/Hibadh/Ftcd/Hadh/Hacl1/Amdhd1/Sardh
GO:0046395	GO:0046395	carboxylic acid catabolic process	45/461	89/3883	1.16116e-19	5.45553e-17	5.10912e-17	Fabp1/Acaa1b/Etfb/Scp2/Acaa2/Hpd/Dbi/Tat/Nudt7/Mat1a/Pon1/Acox1/Ahcy/Fah/Aldh1l1/Hsd17b10/Oat/Pck1/Gstz1/Arg1/Phyh/Hmgcl/Cyp4f18/Hgd/Acadvl/Gcdh/Bckdha/Crot/Cdo1/Pah/Slc27a2/Abcd3/Tdo2/Cbs/Uroc1/Ces1d/Ces1f/Agxt/Sult2a8/Hibadh/Ftcd/Hadh/Hacl1/Amdhd1/Sardh
GO:0008202	GO:0008202	steroid metabolic process	50/461	117/3883	9.22844e-18	3.25187e-15	3.04539e-15	Apoe/Apoa1/Apoa2/Sod1/Gc/Apoc1/Cyp2e1/Ces1c/Acaa1b/Apoc3/Cat/Scp2/Tspo/Apoa5/Hmgcs2/Apof/Comt/Pon1/Ugt2b5/Akr1c6/Hsd17b10/Rdh7/Agt/Apob/Slc27a5/Saa1/Ephx2/Apon/Acadvl/Fdps/Fgl1/Ugt2b1/Cyp1a2/Lcat/Slc27a2/Abcd3/Hint2/Ebp/Fmo5/Hsd11b1/Angptl3/Ces1d/Ces1f/Sult2a8/Amacr/Ugt1a1/Cyp3a11/Hsd3b3/Cyp8b1/Insig2
GO:0006631	GO:0006631	fatty acid metabolic process	57/461	152/3883	6.09608e-17	1.90943e-14	1.78818e-14	Apoa1/Gstp1/Fabp1/Apoc1/C3/Cyp2e1/Ces1c/Acaa1b/Apoc3/Etfb/Elovl3/Scp2/Acaa2/Apoa5/Cyb5a/Cyp2d10/Dbi/Cyp2d9/Nudt7/Acox1/Akr1c6/Cyp2f2/Hsd17b10/Ech1/Pck1/Agt/Cyp2d26/Phyh/Slc27a5/Cyp4f18/Ndufs6/Ephx2/Ces2a/Apoc2/Cyp2c29/Acadvl/Gcdh/Ces2e/Crot/Ndufab1/Hacd4/Cyp1a2/Slc27a2/Abcd3/Rgn/Angptl3/Ces1d/Ces1f/Decr2/Cyp2a12/Cyp2c50/Hadh/Hacl1/Pecr/Adh4/Insig2/Pnpla8
GO:0006629	GO:0006629	lipid metabolic process	106/461	412/3883	9.37222e-17	2.64203e-14	2.47427e-14	Apoe/Apoa1/Apoa2/Sod1/Gstp1/Fabp1/Gc/Apoc1/Mup1/Ttr/C3/F2/Adh1/Cyp2e1/Rbp4/Apoh/Ces1c/Acaa1b/Apoc3/Etfb/Cat/Elovl3/Scp2/Tspo/Acaa2/Apoa5/Cyb5a/Cyp2d10/Hmgcs2/Apof/Dbi/Aadac/Cyp2d9/Comt/Nudt7/Pon1/Ugt2b5/Acox1/Akr1c6/Fah/Cyp2f2/Hsd17b10/Rdh7/Ech1/Pck1/Prdx6/Agt/Apob/Cyp2d26/Phyh/Rarres2/Hmgcl/Slc27a5/Aldh1a1/Cps1/Cyp4f18/Gsta3/Saa1/Ndufs6/Rida/Ephx2/Apon/Ces2a/Apoc2/Cyp2c29/Acadvl/Gcdh/Thrsp/Ces2e…
GO:1901605	GO:1901605	alpha-amino acid metabolic process	34/461	63/3883	3.13717e-16	8.0397e-14	7.5292e-14	Gnmt/Bhmt/Ass1/Hpd/Comt/Tat/Mat1a/Ahcy/Fah/Hsd17b10/Haao/Oat/Gstz1/Sephs2/Arg1/Hmgcl/Asl/Cps1/Ttc36/Hgd/Cdo1/Pah/Tdo2/Cbs/Tst/Gamt/Fh1/Agxt/Pemt/Hibadh/Kyat3/Amdhd1/Sardh/Dglucy
GO:0009063	GO:0009063	cellular amino acid catabolic process	23/461	34/3883	2.55132e-14	5.53243e-12	5.18113e-12	Etfb/Hpd/Tat/Mat1a/Ahcy/Fah/Hsd17b10/Oat/Gstz1/Arg1/Hmgcl/Hgd/Bckdha/Cdo1/Pah/Tdo2/Cbs/Uroc1/Agxt/Hibadh/Ftcd/Amdhd1/Sardh
GO:0044255	GO:0044255	cellular lipid metabolic process	81/461	303/3883	9.06747e-14	1.8258e-11	1.70987e-11	Apoe/Apoa1/Apoa2/Gstp1/Fabp1/Apoc1/Ttr/C3/Adh1/Cyp2e1/Rbp4/Apoh/Ces1c/Acaa1b/Apoc3/Etfb/Cat/Elovl3/Scp2/Acaa2/Apoa5/Cyb5a/Cyp2d10/Hmgcs2/Apof/Dbi/Aadac/Cyp2d9/Nudt7/Pon1/Acox1/Akr1c6/Cyp2f2/Hsd17b10/Ech1/Pck1/Prdx6/Agt/Apob/Cyp2d26/Phyh/Rarres2/Slc27a5/Aldh1a1/Cps1/Cyp4f18/Ndufs6/Ephx2/Ces2a/Apoc2/Cyp2c29/Acadvl/Gcdh/Thrsp/Ces2e/Crot/Ndufab1/Fdps/Hacd4/Cyp1a2/Lcat/Slc27a2/Abcd3/Rgn/Pigk/Angptl3/C…
GO:1901615	GO:1901615	organic hydroxy compound metabolic process	55/461	169/3883	2.59326e-13	4.66671e-11	4.37038e-11	Apoe/Apoa1/Apoa2/Sod1/Gc/Apoc1/Ttr/Adh1/Cyp2e1/Rbp4/Ces1c/Acaa1b/Apoc3/Cat/Scp2/Apoa5/Hmgcs2/Apof/Comt/Pon1/Akr1c6/Fah/Hsd17b10/Pck1/Apob/Sord/Slc27a5/Aldh1a1/Cyp4f18/Hagh/Saa1/Ephx2/Apon/Acadvl/Glo1/Fdps/Fgl1/Ddt/Cyp1a2/Lcat/Slc27a2/Abcd3/Ebp/Fmo5/Angptl3/Ces1d/Ces1f/Sult2a8/Amacr/Hpn/Pecr/Adh4/Dpm2/Cyp8b1/Insig2
GO:0006805	GO:0006805	xenobiotic metabolic process	20/461	28/3883	2.64872e-13	4.66671e-11	4.37038e-11	Gstp1/Cyp2e1/Acaa1b/Cyp2d10/Cyp2d9/Cyp2f2/Cyp2d26/Gsta3/Cyp2c29/Ugt2b1/Cyp1a2/Vkorc1/Fmo5/Gstt1/Guk1/Sult2a8/Ugt1a1/Cyp2a12/Cyp2c50/Cyp3a11
GO:0044283	GO:0044283	small molecule biosynthetic process	55/461	179/3883	3.70197e-12	6.13873e-10	5.74894e-10	Apoe/Apoa1/Sod1/Gstp1/Apoc1/Mup1/Gnmt/Bhmt/Rbp4/Ces1c/Apoc3/Elovl3/Scp2/Apoa5/Hmgcs2/Ass1/Fbp1/Hsd17b10/Haao/Pck1/Agt/Sephs2/Apob/Sord/Hmgcl/Slc27a5/Aldh1a1/Asl/Apoc2/Acadvl/Adk/Ndufab1/Fdps/Pah/Hacd4/Slc27a2/Abcd3/Cbs/Vkorc1/Coq8a/Rgn/Gamt/Ebp/Nnmt/Ces1d/Ces1f/Decr2/Agxt/Amacr/Upb1/Pecr/Ugdh/Cyp8b1/Insig2/Pnpla8
GO:0016053	GO:0016053	organic acid biosynthetic process	37/461	99/3883	2.80575e-11	3.9547e-09	3.70359e-09	Apoa1/Gstp1/Apoc1/Bhmt/Ces1c/Apoc3/Elovl3/Apoa5/Ass1/Hsd17b10/Haao/Agt/Sephs2/Slc27a5/Aldh1a1/Asl/Apoc2/Acadvl/Ndufab1/Pah/Hacd4/Slc27a2/Abcd3/Cbs/Rgn/Gamt/Ces1d/Ces1f/Decr2/Agxt/Amacr/Upb1/Pecr/Ugdh/Cyp8b1/Insig2/Pnpla8
GO:0046394	GO:0046394	carboxylic acid biosynthetic process	37/461	99/3883	2.80575e-11	3.9547e-09	3.70359e-09	Apoa1/Gstp1/Apoc1/Bhmt/Ces1c/Apoc3/Elovl3/Apoa5/Ass1/Hsd17b10/Haao/Agt/Sephs2/Slc27a5/Aldh1a1/Asl/Apoc2/Acadvl/Ndufab1/Pah/Hacd4/Slc27a2/Abcd3/Cbs/Rgn/Gamt/Ces1d/Ces1f/Decr2/Agxt/Amacr/Upb1/Pecr/Ugdh/Cyp8b1/Insig2/Pnpla8
GO:0006790	GO:0006790	sulfur compound metabolic process	37/461	102/3883	7.81828e-11	1.04951e-08	9.8287e-09	Sod1/Gstp1/Hbb-b1/Gnmt/Bhmt/Mgst1/Scp2/Acaa2/Hmgcs2/Comt/Nudt7/Mat1a/Hbb-bt/Ahcy/Gstz1/Hmgcl/Cps1/Gsta3/Hagh/Gcdh/Glo1/Cdo1/Tdo2/Cbs/Tst/Ethe1/Gamt/Mpc1/Gstt1/Ces1d/Agxt/Sult2a8/Pemt/Ciao1/Arl6ip5/Ghr/Ugdh
GO:0016042	GO:0016042	lipid catabolic process	42/461	127/3883	1.20205e-10	1.51635e-08	1.42006e-08	Apoe/Apoa1/Apoa2/Fabp1/Apoc1/Apoh/Ces1c/Acaa1b/Apoc3/Etfb/Scp2/Acaa2/Apoa5/Dbi/Aadac/Nudt7/Acox1/Hsd17b10/Pck1/Prdx6/Apob/Phyh/Rarres2/Cps1/Cyp4f18/Apoc2/Acadvl/Gcdh/Crot/Cyp1a2/Slc27a2/Abcd3/Hint2/Hsd11b1/Angptl3/Ces1d/Ces1f/Sult2a8/Amacr/Hadh/Hacl1/Pnpla8
GO:0050818	GO:0050818	regulation of coagulation	20/461	35/3883	1.23718e-10	1.51635e-08	1.42006e-08	Apoe/Fgb/Serpinc1/Fgg/Kng1/F2/Anxa5/Fga/Apoh/Prdx2/Serpinf2/Proc/Plg/Hrg/Serping1/F12/Psen2/S100a9/Kng2/Vkorc1
GO:0030193	GO:0030193	regulation of blood coagulation	19/461	32/3883	1.45749e-10	1.64346e-08	1.53911e-08	Apoe/Fgb/Serpinc1/Fgg/Kng1/F2/Anxa5/Fga/Apoh/Prdx2/Serpinf2/Proc/Plg/Hrg/Serping1/F12/S100a9/Kng2/Vkorc1
GO:1900046	GO:1900046	regulation of hemostasis	19/461	32/3883	1.45749e-10	1.64346e-08	1.53911e-08	Apoe/Fgb/Serpinc1/Fgg/Kng1/F2/Anxa5/Fga/Apoh/Prdx2/Serpinf2/Proc/Plg/Hrg/Serping1/F12/S100a9/Kng2/Vkorc1
GO:0008203	GO:0008203	cholesterol metabolic process	28/461	65/3883	1.62795e-10	1.76507e-08	1.65299e-08	Apoe/Apoa1/Apoa2/Sod1/Apoc1/Ces1c/Apoc3/Cat/Scp2/Apoa5/Hmgcs2/Apof/Pon1/Apob/Saa1/Ephx2/Apon/Acadvl/Fdps/Fgl1/Lcat/Ebp/Fmo5/Angptl3/Ces1d/Ces1f/Sult2a8/Insig2
GO:0120254	GO:0120254	olefinic compound metabolic process	21/461	39/3883	1.91844e-10	2.00299e-08	1.87581e-08	Gstp1/Ttr/Adh1/Cyp2e1/Rbp4/Scp2/Cyp2d10/Cyp2d9/Akr1c6/Cyp2f2/Cyp2d26/Aldh1a1/Cyp4f18/Ephx2/Cyp2c29/Cyp1a2/Cyp2a12/Cyp2c50/Dhrs4/Adh4/Pnpla8
GO:0051346	GO:0051346	negative regulation of hydrolase activity	40/461	121/3883	3.47251e-10	3.49607e-08	3.27408e-08	Serpina3k/Apoa1/Serpina1e/Serpina1c/Apoa2/Cst3/Serpina1d/Serpina1b/Fabp1/Ahsg/Serpina1a/Apoc1/Serpinc1/Kng1/Vtn/Ambp/Mug1/Apoc3/Pzp/Itih4/Itih3/Serpinf2/Serpinf1/Agt/Hrg/Serping1/Itih1/Fetub/Mug2/Gchfr/Itih2/Serpina3n/Serpina3m/Serpind1/Kng2/Rgn/Angptl3/Serpina10/Hpn/Ppp1r11
GO:0008206	GO:0008206	bile acid metabolic process	12/461	14/3883	5.00949e-10	4.70726e-08	4.40836e-08	Ces1c/Acaa1b/Scp2/Hsd17b10/Slc27a5/Slc27a2/Abcd3/Ces1d/Ces1f/Sult2a8/Amacr/Cyp8b1
GO:0030195	GO:0030195	negative regulation of blood coagulation	15/461	22/3883	8.2057e-10	7.22871e-08	6.7697e-08	Apoe/Fgb/Fgg/Kng1/F2/Anxa5/Fga/Apoh/Serpinf2/Proc/Plg/Hrg/Serping1/F12/Kng2
GO:0010466	GO:0010466	negative regulation of peptidase activity	31/461	82/3883	8.77623e-10	7.49703e-08	7.02099e-08	Serpina3k/Serpina1e/Serpina1c/Cst3/Serpina1d/Serpina1b/Fabp1/Ahsg/Serpina1a/Serpinc1/Kng1/Vtn/Ambp/Mug1/Pzp/Itih4/Itih3/Serpinf2/Serpinf1/Agt/Hrg/Serping1/Itih1/Fetub/Mug2/Itih2/Serpina3n/Serpina3m/Serpind1/Kng2/Serpina10
GO:0042773	GO:0042773	ATP synthesis coupled electron transport	23/461	49/3883	9.24853e-10	7.66812e-08	7.18121e-08	COX1/COX3/CYTB/ND1/ND4/COX2/ND5/ND2/ND4L/ND6/ND3/Cox4i1/Uqcrc1/Uqcr10/Ndufs8/Ndufv3/Ndufs7/Uqcrh/Ndufb9/Sdha/Ndufs6/Ndufv1/Uqcrfs1
GO:0071466	GO:0071466	cellular response to xenobiotic stimulus	21/461	42/3883	1.17256e-09	9.4441e-08	8.84442e-08	Gstp1/Cyp2e1/Acaa1b/Cyp2d10/Cyp2d9/Fbp1/Cyp2f2/Cyp2d26/Gsta3/Cyp2c29/Ugt2b1/Cyp1a2/Vkorc1/Fmo5/Gstt1/Guk1/Sult2a8/Ugt1a1/Cyp2a12/Cyp2c50/Cyp3a11
GO:0042180	GO:0042180	cellular ketone metabolic process	28/461	70/3883	1.30227e-09	1.01975e-07	9.54998e-08	Apoa1/Fabp1/Apoc1/Ces1c/Apoc3/Scp2/Apoa5/Dbi/Comt/Akr1c6/Hsd17b10/Agt/Cyp4f18/Hagh/Apoc2/Acadvl/Glo1/Tdo2/Vkorc1/Coq8a/Rgn/Ces1d/Fh1/Ces1f/Ugt1a1/Kyat3/Adh4/Insig2
GO:1902652	GO:1902652	secondary alcohol metabolic process	28/461	71/3883	1.91632e-09	1.46003e-07	1.36732e-07	Apoe/Apoa1/Apoa2/Sod1/Apoc1/Ces1c/Apoc3/Cat/Scp2/Apoa5/Hmgcs2/Apof/Pon1/Apob/Saa1/Ephx2/Apon/Acadvl/Fdps/Fgl1/Lcat/Ebp/Fmo5/Angptl3/Ces1d/Ces1f/Sult2a8/Insig2
GO:0050819	GO:0050819	negative regulation of coagulation	15/461	23/3883	2.10457e-09	1.52123e-07	1.42463e-07	Apoe/Fgb/Fgg/Kng1/F2/Anxa5/Fga/Apoh/Serpinf2/Proc/Plg/Hrg/Serping1/F12/Kng2
GO:0050817	GO:0050817	coagulation	28/461	72/3883	2.79464e-09	1.92148e-07	1.79947e-07	Apoe/Fgb/Serpinc1/Fgg/Kng1/C3/F2/Anxa5/Fga/Apoh/Prdx2/F10/Serpinf2/Proc/Plg/Hrg/Serping1/C9/Fn1/F12/Psen2/S100a9/Proz/Serpind1/Kng2/Vkorc1/Serpina10/Hgfac
GO:0044242	GO:0044242	cellular lipid catabolic process	34/461	100/3883	3.43122e-09	2.303e-07	2.15676e-07	Apoa1/Apoa2/Fabp1/Apoc1/Apoh/Acaa1b/Apoc3/Etfb/Scp2/Acaa2/Apoa5/Dbi/Aadac/Nudt7/Acox1/Hsd17b10/Pck1/Prdx6/Apob/Phyh/Cps1/Apoc2/Acadvl/Gcdh/Crot/Slc27a2/Abcd3/Angptl3/Ces1d/Ces1f/Amacr/Hadh/Hacl1/Pnpla8
GO:0006694	GO:0006694	steroid biosynthetic process	24/461	56/3883	3.92574e-09	2.57364e-07	2.41022e-07	Apoe/Apoa1/Sod1/Ces1c/Scp2/Tspo/Apoa5/Hmgcs2/Akr1c6/Hsd17b10/Apob/Slc27a5/Fdps/Slc27a2/Abcd3/Hint2/Ebp/Hsd11b1/Ces1d/Ces1f/Amacr/Hsd3b3/Cyp8b1/Insig2
GO:0061045	GO:0061045	negative regulation of wound healing	15/461	24/3883	5.00677e-09	3.20775e-07	3.00406e-07	Apoe/Fgb/Fgg/Kng1/F2/Anxa5/Fga/Apoh/Serpinf2/Proc/Plg/Hrg/Serping1/F12/Kng2
GO:0007596	GO:0007596	blood coagulation	27/461	70/3883	6.69719e-09	4.19542e-07	3.92902e-07	Apoe/Fgb/Serpinc1/Fgg/Kng1/C3/F2/Anxa5/Fga/Apoh/Prdx2/F10/Serpinf2/Proc/Plg/Hrg/Serping1/C9/Fn1/F12/S100a9/Proz/Serpind1/Kng2/Vkorc1/Serpina10/Hgfac
GO:0019646	GO:0019646	aerobic electron transport chain	20/461	42/3883	8.75185e-09	5.13989e-07	4.81352e-07	COX1/COX3/CYTB/ND1/ND4/ND5/ND2/ND6/ND3/Cox4i1/Uqcrc1/Uqcr10/Ndufs8/Ndufs7/Uqcrh/Ndufb9/Sdha/Ndufs6/Ndufv1/Uqcrfs1
GO:0007599	GO:0007599	hemostasis	27/461	71/3883	9.6309e-09	5.4299e-07	5.08511e-07	Apoe/Fgb/Serpinc1/Fgg/Kng1/C3/F2/Anxa5/Fga/Apoh/Prdx2/F10/Serpinf2/Proc/Plg/Hrg/Serping1/C9/Fn1/F12/S100a9/Proz/Serpind1/Kng2/Vkorc1/Serpina10/Hgfac
GO:0006959	GO:0006959	humoral immune response	27/461	72/3883	1.37327e-08	7.59066e-07	7.10867e-07	Trf/Hpx/Fgb/Kng1/C3/F2/Fga/Cfb/C8g/Hrg/Serping1/Rarres2/C9/Inhca/S100a9/C8b/Crp/Wfdc21/C8a/C4bp/Kng2/Cfi/Masp2/Mbl1/Hc/Cfhr2/C1ra
GO:0022900	GO:0022900	electron transport chain	24/461	60/3883	2.05028e-08	1.09052e-06	1.02127e-06	COX1/COX3/CYTB/ND1/ND4/COX2/ND5/ND2/ND4L/ND6/ND3/Cox4i1/Etfb/Uqcrc1/Uqcr10/Ndufs8/Ndufv3/Ndufs7/Uqcrh/Ndufb9/Sdha/Ndufs6/Ndufv1/Uqcrfs1
GO:1903035	GO:1903035	negative regulation of response to wounding	15/461	26/3883	2.35492e-08	1.22935e-06	1.15129e-06	Apoe/Fgb/Fgg/Kng1/F2/Anxa5/Fga/Apoh/Serpinf2/Proc/Plg/Hrg/Serping1/F12/Kng2
GO:0009410	GO:0009410	response to xenobiotic stimulus	29/461	84/3883	3.46624e-08	1.74488e-06	1.63409e-06	Sod1/Gstp1/Cyp2e1/Mgst1/Acaa1b/Cyp2d10/Cyp2d9/Fbp1/Akr1c6/Cyp2f2/Cyp2d26/Aldh1a1/Gsta3/Cyp2c29/Crot/Ugt2b1/Cyp1a2/Vkorc1/Fmo5/Gstt1/Alad/Guk1/Sult2a8/Pemt/Ugt1a1/Cyp2a12/Cyp2c50/Hadh/Cyp3a11
GO:0006699	GO:0006699	bile acid biosynthetic process	9/461	10/3883	3.91314e-08	1.93529e-06	1.8124e-06	Ces1c/Hsd17b10/Slc27a5/Slc27a2/Abcd3/Ces1d/Ces1f/Amacr/Cyp8b1
GO:0006119	GO:0006119	oxidative phosphorylation	27/461	76/3883	5.24511e-08	2.54931e-06	2.38743e-06	COX1/COX3/CYTB/ATP6/ND1/ND4/COX2/ND5/ND2/ATP8/ND4L/ND6/ND3/Cox4i1/Apoc3/Uqcrc1/Uqcr10/Chchd10/Ndufs8/Ndufv3/Ndufs7/Uqcrh/Ndufb9/Sdha/Ndufs6/Ndufv1/Uqcrfs1
GO:0006641	GO:0006641	triglyceride metabolic process	21/461	50/3883	5.84471e-08	2.79258e-06	2.61526e-06	Apoe/Apoa1/Apoc1/C3/Cyp2e1/Apoh/Apoc3/Cat/Apoa5/Apof/Dbi/Aadac/Pck1/Apob/Slc27a5/Cps1/Apoc2/Thrsp/Rgn/Angptl3/Insig2
GO:0006958	GO:0006958	complement activation, classical pathway	13/461	21/3883	6.56948e-08	2.98699e-06	2.79733e-06	C3/C8g/Serping1/C9/C8b/Crp/C8a/C4bp/Cfi/Masp2/Mbl1/Hc/C1ra
GO:0010257	GO:0010257	NADH dehydrogenase complex assembly	17/461	35/3883	8.18872e-08	3.55138e-06	3.32588e-06	ND1/ND4/ND5/ND2/ND6/Ndufa2/Ndufa3/Ndufs8/Ndufs7/Ndufa1/Ndufb2/Ndufb9/Ndufa11/Ndufs6/Ndufab1/Ndufa6/Ndufs5
GO:0032981	GO:0032981	mitochondrial respiratory chain complex I assembly	17/461	35/3883	8.18872e-08	3.55138e-06	3.32588e-06	ND1/ND4/ND5/ND2/ND6/Ndufa2/Ndufa3/Ndufs8/Ndufs7/Ndufa1/Ndufb2/Ndufb9/Ndufa11/Ndufs6/Ndufab1/Ndufa6/Ndufs5
GO:0009062	GO:0009062	fatty acid catabolic process	20/461	47/3883	9.36243e-08	3.99889e-06	3.74497e-06	Fabp1/Acaa1b/Etfb/Scp2/Acaa2/Dbi/Nudt7/Acox1/Hsd17b10/Pck1/Phyh/Acadvl/Gcdh/Crot/Slc27a2/Abcd3/Ces1d/Ces1f/Hadh/Hacl1
GO:0008610	GO:0008610	lipid biosynthetic process	48/461	191/3883	1.4661e-07	5.98976e-06	5.60943e-06	Apoe/Apoa1/Apoa2/Sod1/Gstp1/Apoc1/Mup1/C3/Ces1c/Apoc3/Elovl3/Scp2/Tspo/Apoa5/Hmgcs2/Dbi/Akr1c6/Hsd17b10/Pck1/Agt/Apob/Slc27a5/Aldh1a1/Apoc2/Acadvl/Thrsp/Ndufab1/Fdps/Hacd4/Lcat/Slc27a2/Abcd3/Rgn/Pigk/Hint2/Ebp/Hsd11b1/Ces1d/Ces1f/Decr2/Pemt/Amacr/Pecr/Hsd3b3/Dpm2/Cyp8b1/Insig2/Pnpla8
GO:0000096	GO:0000096	sulfur amino acid metabolic process	9/461	11/3883	1.92644e-07	7.75806e-06	7.26544e-06	Gnmt/Bhmt/Comt/Mat1a/Cps1/Cdo1/Cbs/Tst/Agxt
GO:0009060	GO:0009060	aerobic respiration	31/461	100/3883	1.965e-07	7.80187e-06	7.30646e-06	COX1/COX3/CYTB/ATP6/ND1/ND4/COX2/ND5/ND2/ATP8/ND4L/ND6/ND3/Mup1/Cox4i1/Apoc3/Uqcrc1/Cat/Uqcr10/Chchd10/Ndufs8/Mdh1/Ndufv3/Ndufs7/Uqcrh/Ndufb9/Sdha/Ndufs6/Ndufv1/Uqcrfs1/Fh1
GO:0002455	GO:0002455	humoral immune response mediated by circulating immunoglobulin	14/461	26/3883	2.28269e-07	8.93738e-06	8.36988e-06	Hpx/C3/C8g/Serping1/C9/C8b/Crp/C8a/C4bp/Cfi/Masp2/Mbl1/Hc/C1ra
GO:0006695	GO:0006695	cholesterol biosynthetic process	13/461	24/3883	5.73695e-07	2.12796e-05	1.99284e-05	Apoe/Apoa1/Sod1/Ces1c/Scp2/Apoa5/Hmgcs2/Apob/Fdps/Ebp/Ces1d/Ces1f/Insig2
GO:1902653	GO:1902653	secondary alcohol biosynthetic process	13/461	24/3883	5.73695e-07	2.12796e-05	1.99284e-05	Apoe/Apoa1/Sod1/Ces1c/Scp2/Apoa5/Hmgcs2/Apob/Fdps/Ebp/Ces1d/Ces1f/Insig2
GO:0009072	GO:0009072	aromatic amino acid family metabolic process	9/461	12/3883	6.89817e-07	2.49307e-05	2.33476e-05	Hpd/Tat/Fah/Haao/Gstz1/Ttc36/Hgd/Pah/Tdo2
GO:0006953	GO:0006953	acute-phase response	12/461	21/3883	7.33909e-07	2.61885e-05	2.45256e-05	Hp/Serpina1b/Ahsg/F2/Itih4/Orm1/Serpinf2/Fn1/Saa1/Serpina3n/Crp/Saa2
GO:0006575	GO:0006575	cellular modified amino acid metabolic process	24/461	71/3883	8.49566e-07	2.99366e-05	2.80357e-05	Sod1/Gstp1/Hbb-b1/Gnmt/Bhmt/Mgst1/Ass1/Hbb-bt/Ahcy/Aldh1l1/Gstz1/Asl/Gsta3/Hagh/Glo1/Crot/Ethe1/Gamt/Gstt1/Sult2a8/Pemt/Hpn/Arl6ip5/Sardh
GO:0006956	GO:0006956	complement activation	15/461	32/3883	8.70368e-07	3.02909e-05	2.83675e-05	C3/Cfb/C8g/Serping1/C9/C8b/Crp/C8a/C4bp/Cfi/Masp2/Mbl1/Hc/Cfhr2/C1ra
GO:0016126	GO:0016126	sterol biosynthetic process	13/461	25/3883	1.06733e-06	3.62505e-05	3.39487e-05	Apoe/Apoa1/Sod1/Ces1c/Scp2/Apoa5/Hmgcs2/Apob/Fdps/Ebp/Ces1d/Ces1f/Insig2
GO:0010038	GO:0010038	response to metal ion	29/461	97/3883	1.15158e-06	3.86464e-05	3.61925e-05	CYTB/Trf/Serpina1e/Serpina1c/Sod1/Serpina1d/Fgb/Serpina1b/Fgg/Anxa5/Fga/Crip1/Ppp1ca/Aldob/Cp/Ass1/Fbp1/Tat/Mt1/Haao/Sord/Hrg/Fn1/Egfr/Crp/Cyp1a2/Lcat/Alad/Tfr2
GO:0072376	GO:0072376	protein activation cascade	8/461	10/3883	1.35162e-06	4.48259e-05	4.19796e-05	Fgb/Serpinc1/Fgg/F2/Fga/Apoh/Fn1/F12
GO:0046890	GO:0046890	regulation of lipid biosynthetic process	23/461	70/3883	2.53383e-06	8.21018e-05	7.68885e-05	Apoe/Apoa1/Sod1/Apoc1/Mup1/C3/Ces1c/Apoc3/Scp2/Tspo/Apoa5/Dbi/Pck1/Agt/Apob/Apoc2/Acadvl/Thrsp/Fdps/Rgn/Ces1d/Ces1f/Insig2
GO:0019218	GO:0019218	regulation of steroid metabolic process	17/461	43/3883	3.04552e-06	9.64642e-05	9.03389e-05	Apoe/Apoa1/Apoa2/Sod1/Ces1c/Scp2/Tspo/Apoa5/Agt/Apob/Ephx2/Acadvl/Fdps/Fmo5/Ces1d/Ces1f/Insig2
GO:0034754	GO:0034754	cellular hormone metabolic process	14/461	31/3883	3.55348e-06	0.00011008	0.00010309	Ttr/Adh1/Rbp4/Scp2/Comt/Akr1c6/Hsd17b10/Aldh1a1/Ugt2b1/Cyp1a2/Hsd11b1/Ugt1a1/Adh4/Hsd3b3
GO:0090181	GO:0090181	regulation of cholesterol metabolic process	11/461	20/3883	3.62993e-06	0.000111226	0.000104163	Apoe/Sod1/Ces1c/Scp2/Apob/Ephx2/Acadvl/Fdps/Fmo5/Ces1d/Ces1f
GO:0006957	GO:0006957	complement activation, alternative pathway	8/461	11/3883	4.44221e-06	0.000131817	0.000123447	C3/Cfb/C8g/C9/C8b/C8a/Cfi/Hc
GO:0031639	GO:0031639	plasminogen activation	8/461	11/3883	4.44221e-06	0.000131817	0.000123447	Fgb/Fgg/Fga/Apoh/Serpinf2/F12/S100a10/Hpn
GO:0043086	GO:0043086	negative regulation of catalytic activity	50/461	228/3883	6.51319e-06	0.000187354	0.000175457	Apoe/Serpina3k/Apoa1/Serpina1e/Serpina1c/Apoa2/Cst3/Serpina1d/Serpina1b/Gstp1/Fabp1/Ahsg/Serpina1a/Apoc1/Oaz1/Serpinc1/Kng1/Vtn/Ambp/Mug1/Apoc3/Pzp/Itih4/Itih3/Serpinf2/Serpinf1/Agt/Hrg/Nosip/Serping1/Itih1/Bub3/Errfi1/Inhca/Fetub/Psen2/Mug2/Gchfr/Itih2/Serpina3n/Serpina3m/Serpind1/Kng2/Rgn/Angptl3/Serpina10/Ptprb/Hpn/Ppp1r11/Gskip
GO:0052547	GO:0052547	regulation of peptidase activity	36/461	144/3883	6.61978e-06	0.000188496	0.000176527	Serpina3k/Serpina1e/Serpina1c/Cst3/Serpina1d/Serpina1b/Fabp1/Ahsg/Serpina1a/Serpinc1/Kng1/Vtn/Ambp/Mug1/Pzp/Itih4/Itih3/S100a8/Serpinf2/Serpinf1/Agt/Hrg/Serping1/Itih1/Fetub/Mug2/S100a9/Itih2/Serpina3n/Serpina3m/Serpind1/Kng2/Serpina10/Dap/Arl6ip5/Casp2
GO:0062012	GO:0062012	regulation of small molecule metabolic process	32/461	122/3883	7.47648e-06	0.000210762	0.000197379	COX2/Apoe/Apoa1/Sod1/Fabp1/Apoc1/Mup1/Gnmt/Ppp1ca/Ces1c/Apoc3/Scp2/Apoa5/Dbi/Comt/Fbp1/Agt/Apob/Igfbp4/Ephx2/Apoc2/Acadvl/Fdps/Fgl1/Rgn/Fmo5/Nnmt/Ces1d/Fh1/Ces1f/Ugt1a1/Insig2
GO:0019216	GO:0019216	regulation of lipid metabolic process	32/461	124/3883	1.08161e-05	0.000296025	0.000277228	Apoe/Apoa1/Apoa2/Sod1/Fabp1/Apoc1/Mup1/C3/F2/Apoh/Ces1c/Apoc3/Scp2/Tspo/Apoa5/Dbi/Aadac/Pck1/Agt/Apob/Rarres2/Ephx2/Apoc2/Acadvl/Thrsp/Fdps/Rgn/Fmo5/Angptl3/Ces1d/Ces1f/Insig2
GO:0043691	GO:0043691	reverse cholesterol transport	8/461	12/3883	1.1947e-05	0.000317492	0.000297332	Apoe/Apoa1/Apoa2/Ces1c/Apom/Lcat/Ces1d/Ces1f
GO:0046034	GO:0046034	ATP metabolic process	34/461	136/3883	1.2051e-05	0.000317492	0.000297332	COX1/COX3/CYTB/ATP6/ND1/ND4/COX2/ND5/ND2/ATP8/ND4L/ND6/ND3/Cox4i1/Apoc3/Uqcrc1/Aldob/Tspo/Uqcr10/Chchd10/Fbp1/Ndufs8/Atp5g1/Ndufv3/Atp5l/Ndufs7/Uqcrh/Ndufb9/Sdha/Ndufs6/Ndufv1/Uqcrfs1/Guk1/Clpx
GO:1901617	GO:1901617	organic hydroxy compound biosynthetic process	21/461	66/3883	1.23104e-05	0.000321325	0.000300921	Apoe/Apoa1/Sod1/Ces1c/Scp2/Apoa5/Hmgcs2/Hsd17b10/Pck1/Apob/Slc27a5/Fdps/Ddt/Slc27a2/Abcd3/Ebp/Ces1d/Ces1f/Amacr/Cyp8b1/Insig2
GO:0019369	GO:0019369	arachidonic acid metabolic process	10/461	19/3883	1.7273e-05	0.000440569	0.000412594	Cyp2e1/Cyp2d10/Cyp2d9/Cyp2f2/Cyp2d26/Cyp4f18/Cyp2c29/Cyp2a12/Cyp2c50/Pnpla8
GO:0010565	GO:0010565	regulation of cellular ketone metabolic process	17/461	48/3883	1.73477e-05	0.000440569	0.000412594	Apoa1/Fabp1/Apoc1/Ces1c/Apoc3/Apoa5/Dbi/Comt/Agt/Apoc2/Acadvl/Rgn/Ces1d/Fh1/Ces1f/Ugt1a1/Insig2
GO:0050994	GO:0050994	regulation of lipid catabolic process	12/461	27/3883	2.21002e-05	0.000541743	0.000507344	Apoa1/Apoa2/Fabp1/Apoc1/Apoh/Apoc3/Apoa5/Dbi/Aadac/Rarres2/Apoc2/Angptl3
GO:0034367	GO:0034367	protein-containing complex remodeling	9/461	16/3883	2.30636e-05	0.000546355	0.000511663	Apoe/Apoa1/Apoa2/Apoc1/Apoc3/Apoa5/Apob/Apom/Lcat
GO:0034368	GO:0034368	protein-lipid complex remodeling	9/461	16/3883	2.30636e-05	0.000546355	0.000511663	Apoe/Apoa1/Apoa2/Apoc1/Apoc3/Apoa5/Apob/Apom/Lcat
GO:0034369	GO:0034369	plasma lipoprotein particle remodeling	9/461	16/3883	2.30636e-05	0.000546355	0.000511663	Apoe/Apoa1/Apoa2/Apoc1/Apoc3/Apoa5/Apob/Apom/Lcat
GO:0050820	GO:0050820	positive regulation of coagulation	9/461	16/3883	2.30636e-05	0.000546355	0.000511663	F2/Apoh/Prdx2/Serpinf2/Hrg/F12/Psen2/S100a9/Vkorc1
GO:0009636	GO:0009636	response to toxic substance	17/461	49/3883	2.37018e-05	0.000556794	0.000521439	Sod1/Ambp/Cat/Ass1/Prdx2/Pon1/Cyp2f2/Mt1/Prdx6/Aldh1a1/Gsta3/Ccs/Ephx2/Inmt/Ces1d/Mtarc1/Adh4
GO:0010876	GO:0010876	lipid localization	34/461	141/3883	2.7535e-05	0.000633154	0.00059295	Apoe/Apoa1/Apoa2/Fabp1/Apoc1/Mup1/C3/Rbp4/Apoc4/Apoh/Ces1c/Apoc3/Scp2/Tspo/Apoa5/Apof/Dbi/Slco1b2/Agt/Apob/Stard10/Slc27a5/Apom/Apoc2/Crot/Crp/Lcat/Slc27a2/Abcd3/Angptl3/Ces1d/Ces1f/Cyp8b1/Pnpla8
GO:0042537	GO:0042537	benzene-containing compound metabolic process	7/461	10/3883	2.77169e-05	0.000633154	0.00059295	Acaa1b/Fah/Ephx2/Ugt2b1/Tdo2/Ugt1a1/Kyat3
GO:0042445	GO:0042445	hormone metabolic process	18/461	55/3883	3.38482e-05	0.000745455	0.00069812	Ttr/Adh1/Rbp4/Scp2/Comt/Akr1c6/Hsd17b10/Agt/Aldh1a1/Ugt2b1/Cyp1a2/Hsd11b1/Sult2a8/Ugt1a1/Hpn/Ghr/Adh4/Hsd3b3
GO:0046464	GO:0046464	acylglycerol catabolic process	10/461	21/3883	5.28257e-05	0.00112815	0.00105651	Apoa1/Apoa2/Apoh/Apoc3/Apoa5/Aadac/Apob/Cps1/Apoc2/Ces1d
GO:0071825	GO:0071825	protein-lipid complex subunit organization	10/461	22/3883	8.66899e-05	0.00181021	0.00169527	Apoe/Apoa1/Apoa2/Apoc1/Apoc3/Apoa5/Apob/Apom/Lcat/Ces1d
GO:0071827	GO:0071827	plasma lipoprotein particle organization	10/461	22/3883	8.66899e-05	0.00181021	0.00169527	Apoe/Apoa1/Apoa2/Apoc1/Apoc3/Apoa5/Apob/Apom/Lcat/Ces1d
GO:0019730	GO:0019730	antimicrobial humoral response	11/461	27/3883	0.000128947	0.00257802	0.00241432	Trf/Fgb/Kng1/F2/Fga/Hrg/Rarres2/Inhca/S100a9/Wfdc21/Kng2
GO:0042278	GO:0042278	purine nucleoside metabolic process	7/461	12/3883	0.000147549	0.00288847	0.00270506	Gnmt/Uox/Ahcy/Adk/Gamt/Urah/Pemt
GO:0046128	GO:0046128	purine ribonucleoside metabolic process	7/461	12/3883	0.000147549	0.00288847	0.00270506	Gnmt/Uox/Ahcy/Adk/Gamt/Urah/Pemt
GO:0042632	GO:0042632	cholesterol homeostasis	15/461	46/3883	0.000160742	0.00312505	0.00292662	Apoe/Apoa1/Apoa2/Ces1c/Apoc3/Tspo/Apoa5/Acox1/Apob/Ephx2/Lcat/Angptl3/Ces1d/Ces1f/Hpn
GO:0006749	GO:0006749	glutathione metabolic process	12/461	32/3883	0.000163908	0.00316477	0.00296382	Sod1/Gstp1/Hbb-b1/Mgst1/Hbb-bt/Gstz1/Gsta3/Hagh/Glo1/Ethe1/Gstt1/Arl6ip5
GO:0090207	GO:0090207	regulation of triglyceride metabolic process	10/461	24/3883	0.000210742	0.0039891	0.0037358	Apoe/Apoa1/C3/Apoh/Apoc3/Apoa5/Aadac/Apoc2/Thrsp/Rgn
GO:1905953	GO:1905953	negative regulation of lipid localization	10/461	24/3883	0.000210742	0.0039891	0.0037358	Apoe/Apoa2/Apoc1/Mup1/Ces1c/Tspo/Apoc2/Crp/Ces1d/Ces1f
GO:0008652	GO:0008652	cellular amino acid biosynthetic process	9/461	20/3883	0.000218165	0.00410006	0.00383971	Bhmt/Ass1/Sephs2/Aldh1a1/Asl/Pah/Cbs/Agxt/Upb1
GO:0042060	GO:0042060	wound healing	29/461	125/3883	0.000223983	0.00418151	0.00391599	Apoe/Fgb/Serpinc1/Fgg/Kng1/C3/F2/Anxa5/Fga/Apoh/Prdx2/Sdc4/F10/Serpinf2/Proc/Plg/Hrg/Serping1/C9/Fn1/F12/S100a9/Crp/Proz/Serpind1/Kng2/Vkorc1/Serpina10/Hgfac
GO:0006633	GO:0006633	fatty acid biosynthetic process	17/461	58/3883	0.000258727	0.00479836	0.00449368	Apoa1/Gstp1/Apoc1/Apoc3/Elovl3/Apoa5/Agt/Apoc2/Acadvl/Ndufab1/Hacd4/Abcd3/Rgn/Decr2/Pecr/Insig2/Pnpla8
GO:0034377	GO:0034377	plasma lipoprotein particle assembly	7/461	13/3883	0.000287196	0.00506004	0.00473874	Apoe/Apoa1/Apoa2/Apoa5/Apom/Lcat/Ces1d
GO:0051004	GO:0051004	regulation of lipoprotein lipase activity	7/461	13/3883	0.000287196	0.00506004	0.00473874	Apoa1/Apoc1/Apoh/Apoc3/Apoa5/Apoc2/Angptl3
GO:0065005	GO:0065005	protein-lipid complex assembly	7/461	13/3883	0.000287196	0.00506004	0.00473874	Apoe/Apoa1/Apoa2/Apoa5/Apom/Lcat/Ces1d
GO:0015850	GO:0015850	organic hydroxy compound transport	20/461	75/3883	0.000311623	0.00545631	0.00510984	Apoe/Apoa1/Apoa2/Apoc1/Rbp4/Ces1c/Scp2/Tspo/Apoa5/Slco1b2/Agt/Apob/Apom/Apoc2/Lcat/Abcd3/Slc22a1/Ces1d/Ces1f/Cyp8b1
GO:0010896	GO:0010896	regulation of triglyceride catabolic process	6/461	10/3883	0.000374421	0.00643593	0.00602726	Apoa1/Apoh/Apoc3/Apoa5/Aadac/Apoc2
GO:0033865	GO:0033865	nucleoside bisphosphate metabolic process	11/461	30/3883	0.000387033	0.00653322	0.00611837	Scp2/Acaa2/Hmgcs2/Nudt7/Hmgcl/Gcdh/Crot/Tdo2/Mpc1/Ces1d/Sult2a8
GO:0033875	GO:0033875	ribonucleoside bisphosphate metabolic process	11/461	30/3883	0.000387033	0.00653322	0.00611837	Scp2/Acaa2/Hmgcs2/Nudt7/Hmgcl/Gcdh/Crot/Tdo2/Mpc1/Ces1d/Sult2a8
GO:0034032	GO:0034032	purine nucleoside bisphosphate metabolic process	11/461	30/3883	0.000387033	0.00653322	0.00611837	Scp2/Acaa2/Hmgcs2/Nudt7/Hmgcl/Gcdh/Crot/Tdo2/Mpc1/Ces1d/Sult2a8
GO:1901616	GO:1901616	organic hydroxy compound catabolic process	8/461	18/3883	0.000550016	0.00917453	0.00859196	Apoe/Adh1/Comt/Fah/Sord/Cyp4f18/Sult2a8/Adh4
GO:0010817	GO:0010817	regulation of hormone levels	27/461	121/3883	0.000709101	0.0116898	0.0109475	Fgb/Mup1/Ttr/Fgg/Adh1/Rbp4/Anxa5/Fga/Scp2/Tspo/Comt/Akr1c6/Hsd17b10/Agt/Aldh1a1/Ugt2b1/Cyp1a2/Rapgef4/Hsd11b1/Sult2a8/Ugt1a1/Tfr2/Hadh/Hpn/Ghr/Adh4/Hsd3b3
GO:0034433	GO:0034433	steroid esterification	6/461	11/3883	0.000741589	0.0119459	0.0111874	Apoe/Apoa1/Apoa2/Apoa5/Agt/Lcat
GO:0034434	GO:0034434	sterol esterification	6/461	11/3883	0.000741589	0.0119459	0.0111874	Apoe/Apoa1/Apoa2/Apoa5/Agt/Lcat
GO:0034435	GO:0034435	cholesterol esterification	6/461	11/3883	0.000741589	0.0119459	0.0111874	Apoe/Apoa1/Apoa2/Apoa5/Agt/Lcat
GO:0044273	GO:0044273	sulfur compound catabolic process	6/461	11/3883	0.000741589	0.0119459	0.0111874	Nudt7/Mat1a/Ahcy/Cdo1/Cbs/Agxt
GO:0097006	GO:0097006	regulation of plasma lipoprotein particle levels	12/461	37/3883	0.000769548	0.0123259	0.0115432	Apoe/Apoa1/Apoa2/Apoc1/Apoc3/Apoa5/Apob/Apom/Apoc2/Crp/Lcat/Ces1d
GO:0070328	GO:0070328	triglyceride homeostasis	8/461	19/3883	0.000852643	0.0135034	0.0126459	Apoe/Apoa1/Apoc4/Apoc3/Apoa5/Apoc2/Angptl3/Pnpla8
GO:0032371	GO:0032371	regulation of sterol transport	7/461	15/3883	0.000869721	0.0135455	0.0126854	Apoa1/Apoa2/Apoc1/Scp2/Apoa5/Apoc2/Cyp8b1
GO:0032374	GO:0032374	regulation of cholesterol transport	7/461	15/3883	0.000869721	0.0135455	0.0126854	Apoa1/Apoa2/Apoc1/Scp2/Apoa5/Apoc2/Cyp8b1
GO:0042743	GO:0042743	hydrogen peroxide metabolic process	10/461	28/3883	0.000907212	0.0140518	0.0131596	COX2/Sod1/Hbb-b1/Hba-a1/Cat/Prdx2/Hbb-bt/Acox1/Prdx6/Cyp1a2
GO:0050810	GO:0050810	regulation of steroid biosynthetic process	10/461	29/3883	0.00124052	0.0188013	0.0176074	Apoe/Sod1/Ces1c/Scp2/Tspo/Apob/Fdps/Ces1d/Ces1f/Insig2
GO:0062014	GO:0062014	negative regulation of small molecule metabolic process	10/461	29/3883	0.00124052	0.0188013	0.0176074	Apoe/Sod1/Apoc1/Mup1/Apoc3/Dbi/Fbp1/Acadvl/Ugt1a1/Insig2
GO:0072521	GO:0072521	purine-containing compound metabolic process	28/461	133/3883	0.00148711	0.022064	0.020663	ATP6/COX2/ATP8/Ttr/Gnmt/Aldob/Scp2/Acaa2/Hmgcs2/Uox/Fbp1/Atp5g1/Nudt7/Ahcy/Nme1/Atp5l/Hmgcl/Gcdh/Adk/Crot/Tdo2/Gamt/Urah/Mpc1/Guk1/Ces1d/Sult2a8/Pemt
GO:1990748	GO:1990748	cellular detoxification	9/461	25/3883	0.00153663	0.0225612	0.0211286	Sod1/Ambp/Cat/Prdx2/Prdx6/Aldh1a1/Ccs/Mtarc1/Adh4
GO:0042157	GO:0042157	lipoprotein metabolic process	13/461	45/3883	0.00158132	0.0230971	0.0216305	Apoe/Apoa1/Apoa2/Apoc1/Apoc3/Apoa5/Dbi/Apob/Apom/Lcat/Pigk/Pemt/Dpm2
GO:0031960	GO:0031960	response to corticosteroid	10/461	30/3883	0.00166727	0.0241027	0.0225722	ND3/Ass1/Tat/Pck1/Cdo1/Lcat/Crebrf/Agxt/Cpn1/Hsd3b3
GO:0051384	GO:0051384	response to glucocorticoid	10/461	30/3883	0.00166727	0.0241027	0.0225722	ND3/Ass1/Tat/Pck1/Cdo1/Lcat/Crebrf/Agxt/Cpn1/Hsd3b3
GO:0044092	GO:0044092	negative regulation of molecular function	56/461	325/3883	0.00185846	0.0265939	0.0249053	Apoe/Serpina3k/Apoa1/Serpina1e/Serpina1c/Apoa2/Cst3/Serpina1d/Serpina1b/Gstp1/Fabp1/Ahsg/Serpina1a/Apoc1/Oaz1/Serpinc1/Kng1/Vtn/Ambp/Mug1/Apoc3/Pzp/Cat/Itih4/Prdx2/Itih3/Serpinf2/Serpinf1/Agt/Hrg/Nosip/Serping1/Itih1/Bub3/Errfi1/Ttc36/Inhca/Fetub/Psen2/Mug2/Gchfr/Itih2/Serpina3n/Serpina3m/Serpind1/Siva1/Kng2/Rgn/Angptl3/Serpina10/Dap/Ptprb/Hpn/Ppp1r11/Gskip/Ptprf
GO:0042304	GO:0042304	regulation of fatty acid biosynthetic process	9/461	26/3883	0.00210783	0.0296475	0.027765	Apoa1/Apoc1/Apoc3/Apoa5/Agt/Apoc2/Acadvl/Rgn/Insig2
GO:0046470	GO:0046470	phosphatidylcholine metabolic process	9/461	26/3883	0.00210783	0.0296475	0.027765	Apoa1/Apoa2/Apoc1/Apoa5/Dbi/Pon1/Lcat/Pemt/Pnpla8
GO:0019217	GO:0019217	regulation of fatty acid metabolic process	11/461	36/3883	0.00219087	0.030424	0.0284921	Apoa1/Fabp1/Apoc1/Apoc3/Apoa5/Dbi/Agt/Apoc2/Acadvl/Rgn/Insig2
GO:0015718	GO:0015718	monocarboxylic acid transport	8/461	22/3883	0.00261065	0.0358996	0.0336201	Ces1c/Slco1b2/Stard10/Abcd3/Mpc1/Ces1d/Ces1f/Pnpla8
GO:0034381	GO:0034381	plasma lipoprotein particle clearance	8/461	22/3883	0.00261065	0.0358996	0.0336201	Apoe/Apoa2/Apoc1/Apoc3/Apob/Apom/Apoc2/Crp
GO:0006081	GO:0006081	cellular aldehyde metabolic process	9/461	27/3883	0.00283621	0.0384388	0.035998	Adh1/Rbp4/Aldob/Hagh/Glo1/Grhpr/Agxt/Dhrs4/Adh4
GO:0006637	GO:0006637	acyl-CoA metabolic process	9/461	27/3883	0.00283621	0.0384388	0.035998	Scp2/Acaa2/Hmgcs2/Nudt7/Hmgcl/Gcdh/Tdo2/Mpc1/Ces1d
GO:0035383	GO:0035383	thioester metabolic process	9/461	27/3883	0.00283621	0.0384388	0.035998	Scp2/Acaa2/Hmgcs2/Nudt7/Hmgcl/Gcdh/Tdo2/Mpc1/Ces1d
GO:0097305	GO:0097305	response to alcohol	13/461	48/3883	0.00299079	0.0401477	0.0375985	Serpina1e/Serpina1c/Sod1/Serpina1d/Serpina1b/Adh1/Ces1c/Aldh1a1/Cdo1/Alad/Ces1d/Ces1f/Hsd3b3
GO:0008210	GO:0008210	estrogen metabolic process	5/461	10/3883	0.00349293	0.0447572	0.0419152	Comt/Hsd17b10/Ugt2b1/Cyp1a2/Ugt1a1
GO:0019731	GO:0019731	antibacterial humoral response	5/461	10/3883	0.00349293	0.0447572	0.0419152	Trf/Fgb/Fga/Inhca/Wfdc21
GO:0046500	GO:0046500	S-adenosylmethionine metabolic process	5/461	10/3883	0.00349293	0.0447572	0.0419152	Gnmt/Mat1a/Ahcy/Gamt/Pemt
