# Supplementary material for: Developmental programming of Kupffer cells by maternal obesity causes fatty liver disease in the offspring
Source: Research Square preprint supplement (doi:10.21203/rs.3.rs-3242837/v1), 2023-08-11
Supplement: Supplementary file 3 [file 42f3061d1077b8c465e48447.xlsx]

## Sheet: Sheet1
Package name	Version	Citation
circlize	0.4.15	67
clusterProfiler	4.4.4	51
decoupleR	2.5.2	59
DESeq2	1.36.0	50
DT	0.28	68
ggplot2	3.4.2	69
hcocena	1.0.0	15
msigdbr	7.5.1	70
pheatmap	1.0.12	71
readxl	1.4.1	72
SummarizedExperiment	1.26.1	73
sva	3.44.0	69
