# Supplementary material for: Developmental programming of Kupffer cells by maternal obesity causes fatty liver disease in the offspring
Source: Research Square preprint supplement (doi:10.21203/rs.3.rs-3242837/v1), 2023-08-11
Supplement: Supplementary file 4 [file 436f6e6caac1d8cbcd9af582.xlsx]

## Sheet: Data Key & Explanation
	Data Key & Explanation
HeatMap Description	This is the statistical heat map data table associated with the statsitical anlaysis of the data.
	Chemical Annotation Descriptions
PATHWAY SORTORDER	An internally-generated number intended for sorting compounds by biochemical SUPER PATHWAY and SUB PATHWAY
BIOCHEMICAL NAME	The name of the identified biochemical
Biochemical Name	Indicates a compound that has been confirmed based on an authentic chemical standard and we are highly confident in its identity. (Metabolomics Standards Initiative Tier 1 identification)
Biochemical Name*	Indicates a compound that has not been confirmed based on a standard, but we are confident in its identity. (Not Tier 1)
Biochemical Name**	Indicates a compound for which a standard is not available, but we are reasonably confident in its identity or the information provided. (Not Tier 1)
Biochemical Name (#) or [#]	Indicates a compound that is a structural isomer of another compound in the Metabolon spectral library. For example, a steroid that may be sulfated at one of several positions that are indistinguishable by the mass spectrometry data or a diacylglycerol for which more than one stereospecific molecule exists.
SUPER PATHWAY	The general biochemical class assigned to the identified biochemical (e.g. lipid, amino acid, carbohydrate, etc.) intended for sorting compounds by broad biochemical classes
SUB PATHWAY	A more specific biochemical class assigned to the identified biochemical (e.g. TCA cycle, monoacylglycerols, etc.) intended for grouping/sorting compounds by biochemical pathway/class
PLATFORM	The Metabolon untargeted metabolomics platform consists of four different methods (i.e. Pos Late, Pos Early, Polar, and Neg). This column indicates which method was used to report the values associated with the detected biochemical.
COMP ID	An internally-generated Metabolon compound identifier
KEGG	An alphanumeric compound identifier and link to compound information in the Kyoto Encyclopedia of Genes and Genomes (KEGG)
HMDB	An alphanumeric compound identifier and link to compound information maintained by the Human Metabolome Database (HMDB)
PUBCHEM	A unique numerical identifier assigned by the National Center for Biotechnology Information (NCBI) and searchable in the PubChem database
CHEM ID	Unique identifier for each biochemical. CHEM IDs are listed in the top row of the data tabs of the accompanying client data table (CDT) file.
CAS	A unique numerical identifier assigned by the Chemical Abstracts Service (CAS) to every chemical substance described in the open scientific literature
	Statistical Analysis/Descriptors
FOLD CHANGE	Indicates the ratio of the mean scaled intesity for a metabolite between two experimental groups.
0.55	Green: indicates significant difference (p≤0.05) between the groups shown, metabolite ratio of < 1.00
0.76	Light Green: narrowly missed statistical cutoff for significance 0.05<p<0.10, metabolite ratio of < 1.00
1.71	Red: indicates significant difference (p≤0.05) between the groups shown; metabolite ratio of ≥ 1.00
1.32	Light Red: narrowly missed statistical cutoff for significance 0.05<p<0.10, metabolite ratio of ≥ 1.00
1.2	Non-colored text and cell: mean values are not significantly different for that comparison
	Blue: indicates significant (p≤0.05) ANOVA effect.
	Light Blue: indicates 0.05<p<0.10 ANOVA effect
P-VALUE	p-values for each comparison is derived from the Natural Log-Transformed Data using the corresponding statistical analysis (for eg. t-Test, ANOVA, etc.)
Q-VALUE	Q-values for each comparison is derived from the Natural Log-Transformed Data using False Discovery Rate (FDR) method.
Mean Values	Represents the mean scaled intensity for a metabolite in a particular experimental group.
% FILL	Represents the total percent of samples in a experimental group a metabolite was detected.
© Metabolon, Inc. All rights reserved. The Metabolon name, logo and related trademarks and service marks, owned by Metabolon, Inc. are registered and/or used in the United States and many foreign countries. Any use, copying or reproduction of the trademarks, logos, information, images or designs contained in this document is strictly prohibited without the prior written permission of Metabolon, I…

## Sheet: Pathway Heatmap
	University of Bonn UHBO-06-21MD - Maternal Obesity and Metaflammation
	Heat map of statistically significant biochemicals profiled in this study. Red and green shaded cells indicate p≤0.05 (red indicates that the mean values are significantly higher for that comparison; green values significantly lower). Light red and light green shaded cells indicate 0.05<p<0.10 (light red indicates that the mean values trend higher for that comparison; light green values trend low…									X	Fold of Change																		X	Statistical Values
											Two-Way ANOVA			Two-Way ANOVA Contrasts																Two-Way ANOVA						Two-Way ANOVA Contrasts
											Mother Diet	Offspring	Mother Diet : Offspring Diet	CD CD HFD	HFD CD CD	HFD CD HFD	HFD HFD CD	HFD HFD HFD	HFD CD CD	HFD CD HFD	HFD HFD CD	HFD HFD HFD	HFD CD HFD	HFD HFD CD	HFD HFD HFD	HFD HFD CD	HFD HFD HFD	HFD HFD HFD		Mother Diet		Offspring		Mother Diet : Offspring Diet		CD CD HFD		HFD CD CD		HFD CD HFD		HFD HFD CD		HFD HFD HFD		HFD CD CD		HFD CD HFD
																																				CD CD CD		CD CD CD		CD CD CD		CD CD CD		CD CD CD		CD CD HFD		CD CD HFD
	Pathway Sort Order	Super Pathway	Sub Pathway	Biochemical Name	Platform	Comp ID	KEGG	HMDB	PUBCHEM					CD CD CD	CD CD CD	CD CD CD	CD CD CD	CD CD CD	CD CD HFD	CD CD HFD	CD CD HFD	CD CD HFD	HFD CD CD	HFD CD CD	HFD CD CD	HFD CD HFD	HFD CD HFD	HFD HFD CD		p-value	q-value	p-value	q-value	p-value	q-value	p-value	q-value	p-value	q-value	p-value	q-value	p-value	q-value	p-value	q-value	p-value	q-value	p-value	q-value
	1	Amino Acid	Glycine, Serine and Threonine Metabolism	glycine	LC/MS pos early	58	C00037	HMDB0000123	750					0.91	0.96	0.8	1.11	0.93	1.05	0.89	1.22	1.03	0.84	1.16	0.97	1.38	1.16	0.84		0.1376	0.1094	0.026	0.018	0.8261	0.6744	0.3981	0.29	0.6147	0.5711	0.0571	0.0776	0.2955	0.2364	0.5224	0.4023	0.7303	0.386	0.2742	0.7483
	2			N-acetylglycine	LC/MS pos early	27710		HMDB0000532	10972					1.8	1.35	1.77	1.52	1.9	0.75	0.99	0.85	1.05	1.32	1.13	1.41	0.86	1.07	1.25		0.188	0.1243	0.004	0.0041	0.3649	0.6211	0.0055	0.0193	0.1246	0.3388	0.0084	0.0245	0.033	0.1021	0.0018	0.0103	0.176	0.1706	0.8696	0.8419
	5			sarcosine	LC/MS pos early	1516	C00213	HMDB0000271	1088					0.41	0.6	0.37	0.56	0.41	1.46	0.89	1.37	1.01	0.61	0.94	0.69	1.54	1.13	0.73		0.3891	0.1929	0.0007	0.001	0.2647	0.6099	0.0013	0.0079	0.0642	0.266	0.0014	0.0078	0.0833	0.1256	0.0033	0.0161	0.1232	0.1398	0.9778	0.8582
	6			dimethylglycine	LC/MS pos early	5086	C03626	HMDB0000092	673					0.66	0.93	0.63	1.09	0.76	1.4	0.94	1.64	1.15	0.68	1.17	0.82	1.73	1.21	0.7		0.3403	0.176	0.001	0.0014	0.9869	0.7119	0.043	0.07	0.6236	0.5742	0.02	0.0406	0.5111	0.3056	0.1422	0.1856	0.1176	0.1356	0.7381	0.8407
	7			betaine	LC/MS pos early	3141	C00719	HMDB0000043	247					0.96	0.92	0.77	1.21	0.93	0.97	0.81	1.27	0.98	0.83	1.31	1.01	1.58	1.21	0.77		0.053	0.0744	0.1092	0.0539	0.4416	0.6261	0.9719	0.4996	0.5171	0.5383	0.1184	0.1196	0.1245	0.1507	0.7723	0.4888	0.5399	0.3311	0.1266	0.6579
	10			serine	LC/MS pos early	1648	C00065	HMDB0000187	5951					0.71	0.87	0.75	1	0.79	1.23	1.06	1.41	1.11	0.86	1.14	0.9	1.33	1.05	0.79		0.4813	0.2197	0.0022	0.0025	0.4915	0.6261	0.0098	0.027	0.2124	0.3888	0.0274	0.0499	0.9502	0.4294	0.065	0.1139	0.153	0.1566	0.6698	0.8294
	11			N-acetylserine	LC/MS polar	37076		HMDB0002931	65249					1.19	0.75	0.87	0.93	1.07	0.63	0.73	0.78	0.9	1.16	1.24	1.43	1.07	1.24	1.15		0.0022	0.0299	0.0186	0.0139	0.9205	0.6971	0.0907	0.1155	0.025	0.1933	0.2513	0.1917	0.5865	0.3262	0.4239	0.3583	0.0002	0.0021	0.0063	0.3289
	17			threonine	LC/MS pos early	1284	C00188	HMDB0000167	6288					0.59	0.8	0.65	0.69	0.54	1.35	1.1	1.17	0.91	0.82	0.87	0.67	1.06	0.83	0.78		0.0519	0.0741	3.1946e-05	8.6855e-05	0.1761	0.6099	0.0001	0.0015	0.0901	0.3086	0.001	0.0062	0.0071	0.0618	1.834e-05	0.0005	0.015	0.0384	0.4871	0.7971
	18			N-acetylthreonine	LC/MS neg	33939		HMDB0062557	152204					1.1	0.75	0.95	0.81	1	0.68	0.86	0.73	0.91	1.26	1.08	1.34	0.85	1.06	1.24		0.019	0.0516	0.0115	0.0096	0.7177	0.6492	0.3879	0.2862	0.0128	0.1645	0.4969	0.3025	0.092	0.1311	0.9396	0.5356	0.0013	0.007	0.1274	0.6579
	19			allo-threonine	LC/MS polar	15142	C05519	HMDB0004041	99289					0.42	0.46	0.65	0.46	0.42	1.11	1.55	1.1	1.01	1.41	1	0.91	0.71	0.65	0.92		0.1636	0.1164	0.2999	0.1178	0.0113	0.5556	0.0036	0.0153	0.0056	0.1293	0.1008	0.1101	0.0056	0.0618	0.006	0.0261	0.8697	0.4314	0.1619	0.6879
	29		Alanine and Aspartate Metabolism	alanine	LC/MS pos early	1126	C00041	HMDB0000161	5950					0.74	0.86	0.63	0.96	0.69	1.16	0.85	1.3	0.93	0.73	1.11	0.8	1.53	1.1	0.72		0.0913	0.0891	1.8414e-05	5.4155e-05	0.9671	0.7081	0.0117	0.0293	0.1536	0.3576	0.0001	0.0018	0.7704	0.3779	0.0021	0.0117	0.238	0.2091	0.1047	0.6317
	31			N-acetylalanine	LC/MS polar	1585	C02847	HMDB0000766	88064					0.98	0.75	0.84	0.92	0.95	0.76	0.86	0.94	0.97	1.12	1.22	1.27	1.09	1.13	1.04		0.0175	0.051	0.4069	0.1504	0.7717	0.6585	0.9877	0.5025	0.0145	0.1693	0.1267	0.1248	0.4331	0.2805	0.7438	0.481	0.015	0.0384	0.1304	0.6633
	33			N,N-dimethylalanine	LC/MS pos early	63151			5488191					0.33	0.29	0.62	0.32	0.33	0.87	1.87	0.96	1.01	2.15	1.1	1.16	0.51	0.54	1.05		0.514	0.2255	0.9968	0.2896	0.1206	0.6099	0.2973	0.2453	0.1294	0.3411	0.8736	0.444	0.3337	0.2442	0.1094	0.1598	0.6239	0.3535	0.2312	0.7205
	36			aspartate	LC/MS pos early	443	C00049	HMDB0000191	5960					0.71	0.48	1.1	0.89	0.97	0.67	1.54	1.26	1.36	2.3	1.88	2.04	0.81	0.88	1.08		0.3606	0.1835	0.252	0.1023	0.0392	0.6099	0.2528	0.2243	0.0075	0.1353	0.8159	0.4274	0.3128	0.2401	0.658	0.4511	0.1029	0.1229	0.3598	0.7908
	37			N-acetylaspartate (NAA)	LC/MS polar	22185	C01042	HMDB0000812	65065					0.93	0.9	0.82	0.85	0.96	0.97	0.88	0.91	1.03	0.91	0.94	1.06	1.04	1.17	1.12		0.4399	0.2084	0.9363	0.2772	0.5886	0.6348	0.6089	0.3772	0.2942	0.447	0.207	0.1695	0.2585	0.2173	0.7871	0.4915	0.5868	0.3419	0.4471	0.7971
	40			asparagine	LC/MS pos early	512	C00152	HMDB0000168	6267					0.67	0.83	0.67	0.98	0.78	1.24	1	1.45	1.15	0.81	1.18	0.93	1.46	1.16	0.79		0.2234	0.1371	0.0055	0.0053	0.6838	0.6464	0.023	0.0461	0.1518	0.3547	0.0129	0.0309	0.9788	0.4364	0.1146	0.1637	0.3686	0.2636	0.8109	0.8407
	42			N-acetylasparagine	LC/MS pos early	33942		HMDB0006028	99715					1.01	0.77	0.84	0.86	1.09	0.76	0.83	0.85	1.08	1.09	1.12	1.42	1.03	1.31	1.27		0.0537	0.0745	0.278	0.1112	0.5574	0.6261	0.8446	0.4631	0.099	0.31	0.14	0.1309	0.2994	0.2372	0.6391	0.4431	0.0667	0.0916	0.0965	0.6317
	43			hydroxyasparagine**	LC/MS pos early	62060	C20631	HMDB32332	15991574					1.08	1.02	0.93	0.85	1	0.94	0.87	0.79	0.93	0.92	0.84	0.98	0.91	1.07	1.17		0.1352	0.1084	0.2461	0.1004	0.0817	0.6099	0.2883	0.2423	0.6873	0.5922	0.4795	0.2958	0.058	0.1139	0.8997	0.5217	0.5059	0.3175	0.0815	0.5922
	46		Glutamate Metabolism	glutamate	LC/MS pos early	57	C00025 C00217	HMDB0000148	33032					0.67	0.54	0.91	0.9	0.93	0.8	1.34	1.34	1.37	1.68	1.67	1.72	1	1.02	1.03		0.1967	0.1272	0.7438	0.2344	0.0244	0.6099	0.0719	0.0991	0.0059	0.1293	0.4757	0.2952	0.5108	0.3056	0.6591	0.4511	0.2909	0.2324	0.2644	0.7483
	47			glutamine	LC/MS pos early	53	C00064	HMDB0000641	5961					0.92	1.15	0.95	1.08	0.96	1.25	1.03	1.18	1.05	0.83	0.94	0.84	1.14	1.01	0.89		0.1665	0.1179	0.0008	0.0011	0.3841	0.6241	0.232	0.2124	0.0269	0.1933	0.3896	0.2629	0.1892	0.1872	0.5461	0.4125	0.0012	0.0069	0.7323	0.8407
	48			alpha-ketoglutaramate*	LC/MS polar	62101	C00940	HMDB0001552	48					0.69	0.84	0.76	1.1	0.82	1.21	1.1	1.59	1.18	0.9	1.31	0.97	1.45	1.08	0.74		0.3485	0.1787	0.026	0.018	0.8074	0.6706	0.0779	0.1042	0.3413	0.4819	0.0722	0.0896	0.7713	0.3779	0.3116	0.3028	0.4006	0.2778	0.9704	0.8558
	49			N-acetylglutamate	LC/MS polar	15720	C00624	HMDB0001138	70914					1.27	0.76	0.89	1.13	1.18	0.6	0.7	0.89	0.93	1.18	1.49	1.56	1.26	1.32	1.05		0.0279	0.0595	0.2185	0.0912	0.9107	0.6924	0.2893	0.2426	0.1616	0.3647	0.3967	0.2655	0.7229	0.3667	0.3849	0.343	0.0169	0.0408	0.0611	0.5421
	50			N-acetylglutamine	LC/MS pos early	33943	C02716	HMDB0006029	182230					1.43	1.2	0.98	1.12	1.29	0.84	0.69	0.78	0.9	0.82	0.94	1.08	1.14	1.31	1.15		0.4512	0.2115	0.3014	0.1178	0.0371	0.6099	0.0245	0.0477	0.2857	0.44	0.7372	0.4004	0.4962	0.2993	0.1234	0.1694	0.2143	0.1936	0.0109	0.3345
	53			4-hydroxyglutamate	LC/MS pos early	40499	C03079	HMDB0001344	439902					1.21	0.56	0.82	0.72	1.22	0.46	0.67	0.6	1	1.46	1.29	2.17	0.89	1.49	1.68		0.0147	0.0471	0.0062	0.0058	0.681	0.6461	0.2051	0.1964	0.0366	0.2109	0.4149	0.2717	0.2111	0.1967	0.2687	0.281	0.0014	0.0075	0.0414	0.4827
	57			N-acetyl-aspartyl-glutamate (NAAG)	LC/MS pos early	35665	C12270	HMDB0001067	188803					0.97	0.78	0.76	0.99	0.93	0.8	0.78	1.02	0.96	0.98	1.28	1.19	1.31	1.22	0.94		0.0513	0.0741	0.8872	0.2662	0.9475	0.7036	0.8957	0.4778	0.1327	0.3453	0.1209	0.1213	0.9432	0.4291	0.7983	0.4945	0.1035	0.1233	0.0939	0.6317
	60			carboxyethyl-GABA	LC/MS pos early	40007		HMDB0002201	2572					0.93	0.87	0.89	1	0.98	0.94	0.95	1.07	1.05	1.02	1.14	1.12	1.12	1.1	0.98		0.3467	0.1786	0.7422	0.2344	0.8558	0.6813	0.5428	0.351	0.2315	0.4009	0.3016	0.2208	0.9199	0.4223	0.8195	0.4996	0.5505	0.3325	0.6671	0.8292
	61			N-methyl-GABA	LC/MS pos early	39577	C15987		70703					0.89	0.64	0.61	0.95	1.01	0.72	0.69	1.06	1.13	0.95	1.47	1.56	1.54	1.64	1.06		0.063	0.0806	0.8496	0.2597	0.8824	0.6846	0.6503	0.3964	0.1133	0.3301	0.089	0.1025	0.7835	0.3815	0.9796	0.5435	0.2513	0.2134	0.205	0.7154
	62			2-pyrrolidinone	LC/MS pos early	31675		HMDB0002039	12025					0.6	0.53	0.48	0.68	0.66	0.88	0.8	1.14	1.1	0.91	1.3	1.25	1.43	1.38	0.96		0.0003	0.0106	0.0273	0.0187	0.0742	0.6099	0.0024	0.0118	5.0171e-05	0.0141	1.7415e-05	0.0005	0.0223	0.0942	0.0089	0.034	0.1875	0.18	0.0993	0.6317
	64			S-1-pyrroline-5-carboxylate	LC/MS pos early	42370	C04322	HMDB0001301	11966181					0.5	0.71	0.62	1.52	0.66	1.43	1.26	3.06	1.33	0.88	2.15	0.93	2.44	1.06	0.43		0.0558	0.0754	0.0018	0.0022	0.1123	0.6099	0.0198	0.041	0.172	0.3647	0.1106	0.1168	0.0922	0.1311	0.1578	0.2021	0.3033	0.2369	0.4277	0.7971
	72		Histidine Metabolism	histidine	LC/MS neg	59	C00135	HMDB0000177	6274					0.75	0.92	0.81	1.01	0.81	1.24	1.08	1.35	1.08	0.88	1.09	0.87	1.25	1	0.8		0.8479	0.3136	0.0014	0.0019	0.525	0.6261	0.0106	0.0277	0.3883	0.4921	0.0551	0.0763	0.9614	0.4314	0.0398	0.0843	0.0766	0.0998	0.4798	0.7971
	73			1-methylhistidine	LC/MS pos early	30460	C01152	HMDB0000001	92105					1.64	1.25	1.14	1.13	1.31	0.76	0.7	0.69	0.8	0.91	0.91	1.05	0.99	1.15	1.16		0.6973	0.2725	0.0757	0.0409	0.0396	0.6099	0.004	0.0163	0.1505	0.3544	0.418	0.2734	0.5724	0.3216	0.1967	0.233	0.1177	0.1356	0.0305	0.4708
	74			3-methylhistidine	LC/MS neg	15677	C01152	HMDB0000479	64969					0.97	1.32	0.98	1.01	0.96	1.36	1.01	1.04	0.99	0.74	0.76	0.73	1.03	0.98	0.95		0.2752	0.1551	0.0869	0.0454	0.3872	0.6261	0.7133	0.421	0.07	0.2771	0.7773	0.416	0.9768	0.436	0.6225	0.4379	0.0315	0.0583	0.9324	0.8482
	75			N-acetylhistidine	LC/MS pos early	33946	C02997	HMDB0032055	75619					1.08	0.88	0.8	0.89	0.89	0.81	0.74	0.82	0.82	0.91	1.01	1.01	1.11	1.11	1		0.0604	0.079	0.7474	0.2344	0.5107	0.6261	0.5348	0.3482	0.3775	0.4921	0.0626	0.082	0.4846	0.2987	0.3915	0.3451	0.1372	0.1472	0.0152	0.3755
	77			N-acetyl-3-methylhistidine*	LC/MS pos early	43256		HMDB0240341	193270					1.17	1.44	1.16	0.91	1.35	1.23	0.99	0.78	1.15	0.8	0.63	0.93	0.79	1.16	1.48		0.5445	0.2322	0.1388	0.0652	0.1164	0.6099	0.3786	0.2834	0.1447	0.3506	0.4039	0.2666	0.5189	0.3084	0.0931	0.1467	0.5527	0.333	0.9628	0.8558
	78			N-acetyl-1-methylhistidine*	LC/MS pos early	43255		HMDB0240340	53859791					1.7	1.36	1.37	1.14	1.75	0.8	0.81	0.68	1.03	1.01	0.84	1.28	0.83	1.27	1.52		0.9362	0.3345	0.0019	0.0023	0.0725	0.6099	0.0028	0.0131	0.0972	0.3086	0.0911	0.1036	0.5697	0.321	0.0033	0.0161	0.1406	0.1501	0.1494	0.6706
	79			hydantoin-5-propionate	LC/MS polar	40473	C05565	HMDB0001212	782					0.92	0.5	0.61	0.54	0.85	0.54	0.66	0.59	0.92	1.22	1.09	1.71	0.89	1.4	1.57		0.0034	0.034	0.1597	0.0723	0.3453	0.6211	0.8113	0.4525	0.0037	0.1206	0.0323	0.0553	0.0105	0.0712	0.4008	0.3483	0.007	0.0237	0.0546	0.5421
	80			trans-urocanate	LC/MS pos early	607	C00785	HMDB0000301	736715					0.67	0.8	0.42	0.75	0.64	1.19	0.62	1.11	0.95	0.53	0.94	0.8	1.78	1.52	0.85		0.2806	0.1561	0.091	0.0471	0.4305	0.6261	0.2799	0.2373	0.4798	0.5187	0.0136	0.032	0.185	0.1853	0.1756	0.2162	0.7039	0.3778	0.1429	0.6706
	81			cis-urocanate	LC/MS neg	40410		HMDB0034174	1549103					0.64	1.11	0.75	0.83	0.47	1.75	1.18	1.3	0.75	0.67	0.74	0.43	1.11	0.63	0.57		0.0416	0.0695	0.0017	0.0022	0.9089	0.6924	0.1183	0.1374	0.4307	0.5048	0.207	0.1695	0.3363	0.2445	0.0033	0.0161	0.0218	0.0461	0.7546	0.8407
	82			imidazole propionate	LC/MS pos early	40730		HMDB0002271	70630					0.46	0.25	0.44	0.47	1.19	0.54	0.95	1.02	2.59	1.78	1.89	4.82	1.07	2.72	2.55		0.0401	0.0685	0.1483	0.0685	0.0073	0.5102	0.0749	0.1015	0.0017	0.068	0.0992	0.1091	0.0295	0.1002	0.6757	0.4571	0.1269	0.1411	0.8881	0.8419
	83			formiminoglutamate	LC/MS pos early	43493	C00439	HMDB0000854	439233					0.44	0.84	0.36	0.77	1.34	1.9	0.81	1.75	3.04	0.43	0.92	1.6	2.15	3.74	1.74		0.381	0.1904	0.0452	0.0278	0.094	0.6099	0.0385	0.0651	0.5474	0.5442	0.0107	0.0277	0.3355	0.2445	0.7365	0.478	0.1322	0.1448	0.5906	0.8158
	85			imidazole lactate	LC/MS pos early	15716	C05568	HMDB0002320	793					1.2	0.94	0.94	0.76	1.03	0.78	0.78	0.63	0.86	1	0.81	1.09	0.81	1.1	1.35		0.0944	0.0899	0.0219	0.0158	0.2077	0.6099	0.1087	0.1297	0.7951	0.6202	0.7877	0.4189	0.0555	0.1139	0.5969	0.4299	0.0646	0.0893	0.0633	0.5421
	86			carnosine	LC/MS pos early	1768	C00386	HMDB0000033	439224					1.09	0.71	0.76	0.7	1.12	0.65	0.69	0.64	1.03	1.06	0.99	1.57	0.93	1.48	1.59		0.0154	0.0471	0.0544	0.0316	0.1392	0.6099	0.7063	0.4189	0.0426	0.2264	0.0724	0.0896	0.0268	0.0992	0.6171	0.4372	0.0179	0.0416	0.032	0.4708
	88			N-acetylcarnosine	LC/MS pos early	43488		HMDB0012881	9903482					0.84	0.42	0.39	0.45	1.22	0.49	0.47	0.54	1.46	0.94	1.09	2.94	1.16	3.12	2.69		0.0133	0.0471	0.1251	0.0603	0.0621	0.6099	0.8166	0.4536	0.0349	0.2101	0.0393	0.0622	0.0688	0.1162	0.312	0.3028	0.058	0.0855	0.0647	0.5429
	89			anserine	LC/MS pos early	15747	C01262	HMDB0000194	112072					1.1	0.78	0.76	0.75	1.18	0.71	0.69	0.68	1.07	0.98	0.96	1.52	0.98	1.55	1.58		0.0095	0.0443	0.0292	0.0196	0.0337	0.6099	0.5253	0.3456	0.0703	0.2771	0.0465	0.0681	0.027	0.0992	0.2445	0.2617	0.0168	0.0408	0.0104	0.3345
	90			histamine	LC/MS pos early	1574	C00388	HMDB0000870	774					0.57	0.73	0.53	0.97	0.74	1.28	0.93	1.71	1.3	0.73	1.34	1.02	1.83	1.39	0.76		0.2158	0.1347	0.0028	0.0031	0.8775	0.684	0.0302	0.0541	0.1762	0.3647	0.0057	0.02	0.8891	0.4134	0.0685	0.1185	0.386	0.2708	0.4992	0.8015
	92			1-methylhistamine	LC/MS pos early	43831	C05127	HMDB0000898	3614					1	0.93	1.01	0.75	0.99	0.93	1.02	0.75	0.99	1.09	0.81	1.07	0.74	0.98	1.33		0.2212	0.1365	0.1878	0.0821	0.543	0.6261	0.9262	0.4876	0.3755	0.4921	0.939	0.4674	0.0542	0.1139	0.5884	0.427	0.4266	0.2871	0.8657	0.8419
	93			1-methyl-4-imidazoleacetate	LC/MS pos early	32350	C05828	HMDB0002820	75810					0.91	1.15	1.25	0.94	1.23	1.27	1.37	1.03	1.35	1.09	0.81	1.07	0.75	0.99	1.31		0.4453	0.21	0.4634	0.1669	0.4367	0.6261	0.6709	0.4047	0.605	0.5655	0.4109	0.2699	0.5341	0.3115	0.4439	0.3659	0.3483	0.2555	0.2156	0.7205
	94			1-methyl-5-imidazoleacetate	LC/MS pos early	62946		HMDB04988	6451814					1.32	1.42	1.48	0.61	1.15	1.07	1.12	0.46	0.87	1.04	0.43	0.81	0.41	0.78	1.89		0.0012	0.0219	0.0044	0.0045	0.1237	0.6099	0.1608	0.1664	0.1003	0.3127	0.0392	0.0622	0.0131	0.0796	0.448	0.3659	0.8006	0.4072	0.4837	0.7971
	95			1-methyl-5-imidazolelactate	LC/MS neg	64596								1.61	1.3	1.58	0.81	1.82	0.8	0.98	0.5	1.13	1.22	0.62	1.4	0.51	1.15	2.25		0.4216	0.204	8.5531e-06	3.0184e-05	0.0435	0.6099	0.006	0.0199	0.1172	0.3316	0.0085	0.0245	0.2699	0.2222	0.0006	0.0052	0.1962	0.1847	0.8911	0.8419
	98			1-ribosyl-imidazoleacetate*	LC/MS pos early	61868	C05131	HMDB0002331	440569					1.09	1.08	1.05	0.49	0.96	1	0.96	0.45	0.88	0.97	0.45	0.88	0.47	0.91	1.96		0.145	0.1106	0.0234	0.0167	0.3062	0.6099	0.4374	0.3042	0.9536	0.6692	0.4694	0.2936	0.0372	0.1045	0.6353	0.4429	0.4721	0.3049	0.9572	0.8541
	99			4-imidazoleacetate	LC/MS pos early	32349	C02835	HMDB0002024	96215					0.65	0.67	0.65	0.79	0.73	1.03	1	1.21	1.12	0.97	1.18	1.09	1.21	1.12	0.93		0.3041	0.1638	0.1045	0.0521	0.2903	0.6099	0.0312	0.0552	0.0357	0.2101	0.0287	0.0511	0.1635	0.1731	0.0568	0.1054	0.9522	0.4483	0.9712	0.8558
	107		Lysine Metabolism	lysine	LC/MS pos early	1301	C00047 C00739	HMDB0003405	5962					0.75	0.93	0.74	0.76	0.74	1.24	0.99	1.02	0.99	0.8	0.82	0.8	1.02	0.99	0.97		0.0905	0.089	0.0007	0.001	0.097	0.6099	0.002	0.0101	0.4245	0.5045	0.0011	0.0069	0.0041	0.058	0.0016	0.01	0.0159	0.0394	0.8445	0.8419
	108			N2-acetyllysine	LC/MS polar	36751	C12989	HMDB0000446	92907					0.62	0.75	0.73	0.69	0.56	1.22	1.18	1.11	0.91	0.97	0.91	0.75	0.94	0.77	0.82		0.1743	0.1205	0.0442	0.0275	0.1887	0.6099	0.0137	0.0325	0.064	0.266	0.0693	0.088	0.0411	0.1049	0.0031	0.0156	0.4992	0.315	0.4757	0.7971
	109			N6-acetyllysine	LC/MS neg	36752	C02727	HMDB0000206	92832					0.65	0.72	0.65	0.84	0.65	1.11	0.99	1.28	1	0.9	1.16	0.9	1.29	1.01	0.78		0.0754	0.0846	0.0002	0.0004	0.2511	0.6099	0.0008	0.0059	0.0072	0.1342	0.0002	0.0025	0.1135	0.1466	0.0006	0.0052	0.4335	0.2888	0.6321	0.8241
	112			N2-acetyl,N6,N6-dimethyllysine	LC/MS pos early	63254								1	0.87	0.84	1.01	1.03	0.87	0.84	1.01	1.03	0.97	1.16	1.18	1.21	1.22	1.02		0.1281	0.1067	0.8843	0.2662	0.9432	0.7014	0.7702	0.4398	0.4082	0.494	0.3158	0.2274	0.6799	0.3522	0.5818	0.4253	0.2654	0.2199	0.198	0.7154
	113			N2,N6-diacetyllysine	LC/MS neg	48455			91827					0.74	0.84	0.82	0.89	0.78	1.14	1.1	1.2	1.05	0.97	1.05	0.92	1.09	0.95	0.88		0.7746	0.2944	0.0544	0.0316	0.3552	0.6211	0.0256	0.0486	0.1795	0.3647	0.0821	0.0964	0.2097	0.1967	0.0562	0.1051	0.3434	0.254	0.5919	0.8158
	116			N6-methyllysine	LC/MS pos early	62860	C02728	HMDB0002038	164795					0.98	0.9	0.78	0.93	0.99	0.92	0.8	0.95	1.01	0.87	1.04	1.1	1.19	1.26	1.06		0.0804	0.085	0.7384	0.234	0.4497	0.6261	0.9576	0.4957	0.3772	0.4921	0.0437	0.0662	0.644	0.3427	0.9257	0.5314	0.3496	0.256	0.0389	0.4776
	117			N6,N6-dimethyllysine	LC/MS pos early	62862	C05545	HMDB0013287	193344					1.11	0.98	0.77	1.14	1.13	0.88	0.69	1.03	1.02	0.78	1.16	1.16	1.49	1.48	1		0.0365	0.0671	0.5511	0.1861	0.0951	0.6099	0.3242	0.2592	0.7845	0.6157	0.0773	0.094	0.2928	0.2357	0.27	0.2814	0.4737	0.305	0.0078	0.3345
	118			N6,N6,N6-trimethyllysine	LC/MS pos early	1498	C03793	HMDB0001325	440120					1.02	0.89	2.21	2.54	1.19	0.87	2.17	2.49	1.17	2.49	2.87	1.34	1.15	0.54	0.47		0.3164	0.167	0.5425	0.1836	0.1577	0.6099	0.8598	0.4668	0.7471	0.6088	0.1411	0.1309	0.1078	0.142	0.4844	0.3843	0.6181	0.3527	0.1929	0.7154
	119			hydroxy-N6,N6,N6-trimethyllysine*	LC/MS pos early	62959								1.17	0.87	1.23	1.34	1.28	0.74	1.04	1.14	1.09	1.41	1.54	1.48	1.09	1.05	0.96		0.3764	0.1891	0.1516	0.0694	0.9356	0.7011	0.4904	0.3273	0.5017	0.5307	0.6445	0.3646	0.5887	0.3267	0.2221	0.2507	0.1775	0.1713	0.8183	0.8407
	121			5-hydroxylysine	LC/MS pos early	15685	C16741	HMDB0000450	3032849					0.85	0.7	0.67	0.65	0.79	0.83	0.78	0.76	0.92	0.95	0.92	1.11	0.98	1.18	1.21		0.0001	0.0106	0.9741	0.2843	0.0364	0.6099	0.1489	0.1587	0.0012	0.068	0.0002	0.0024	6.433e-05	0.0086	0.0242	0.061	0.0483	0.0763	0.0111	0.3345
	122			5-(galactosylhydroxy)-lysine	LC/MS pos early	43582			66995551					1.1	0.9	0.7	0.73	1.07	0.82	0.64	0.67	0.97	0.78	0.82	1.19	1.04	1.52	1.46		0.0032	0.0334	0.2025	0.0866	0.0012	0.2646	0.4481	0.3097	0.2659	0.423	0.0026	0.0117	0.0042	0.058	0.5986	0.4299	0.0659	0.0908	0.0003	0.081
	123			fructosyllysine	LC/MS pos early	46227		HMDB0034879	9839580					0.89	1.1	0.86	0.57	0.73	1.24	0.97	0.64	0.82	0.78	0.52	0.66	0.66	0.85	1.29		0.0727	0.0845	0.8643	0.2624	0.3966	0.6261	0.8014	0.4492	0.4886	0.5234	0.9601	0.4731	0.0704	0.1162	0.5109	0.3974	0.3469	0.2553	0.763	0.8407
	125			2-aminoadipate	LC/MS polar	6146	C00956	HMDB0000510	92136					0.73	1.08	0.69	0.68	0.65	1.48	0.95	0.94	0.89	0.64	0.63	0.6	0.99	0.94	0.95		0.6289	0.2568	0.1388	0.0652	0.6627	0.6447	0.2406	0.2184	0.8335	0.6366	0.14	0.1309	0.2339	0.2065	0.1879	0.2248	0.3329	0.2511	0.7539	0.8407
	127			2-oxoadipate	LC/MS polar	38347	C00322	HMDB0000225	71					0.73	0.94	0.59	0.93	0.83	1.28	0.8	1.27	1.13	0.63	0.99	0.88	1.58	1.4	0.89		0.2514	0.1466	0.1347	0.064	0.8079	0.6706	0.2789	0.237	0.3332	0.4761	0.0359	0.059	0.7205	0.3659	0.4808	0.3839	0.9063	0.4383	0.2871	0.7483
	129			glutarylcarnitine (C5-DC)	LC/MS pos early	44664		HMDB0013130	71317118					0.7	0.85	0.65	1.03	0.91	1.22	0.93	1.48	1.3	0.76	1.21	1.06	1.58	1.39	0.88		0.0349	0.0668	0.0229	0.0163	0.6594	0.6447	0.0511	0.079	0.2197	0.394	0.0125	0.0306	0.7352	0.3682	0.7067	0.4675	0.4469	0.2949	0.5452	0.8113
	133			pipecolate	LC/MS pos early	1444		HMDB0000070						1.18	1.07	1.12	0.79	1.15	0.9	0.94	0.67	0.98	1.04	0.74	1.08	0.71	1.03	1.46		0.1789	0.1216	0.0083	0.0074	0.1024	0.6099	0.173	0.174	0.5177	0.5383	0.4124	0.2706	0.0447	0.1102	0.2419	0.2612	0.466	0.3019	0.5783	0.8156
	135			6-oxopiperidine-2-carboxylate	LC/MS neg	43231		HMDB0061705	3014237					0.62	1.13	0.77	0.86	0.8	1.83	1.25	1.4	1.29	0.68	0.76	0.71	1.11	1.03	0.93		0.6893	0.2713	0.0206	0.015	0.4671	0.6261	0.042	0.069	0.6982	0.5958	0.2068	0.1695	0.5382	0.312	0.3085	0.3012	0.0171	0.0408	0.4162	0.7971
	138			5-aminovalerate	LC/MS pos early	18319	C00431	HMDB0003355	138					0.56	0.22	0.44	1.24	1.64	0.38	0.77	2.2	2.92	2.01	5.71	7.58	2.84	3.77	1.33		0.001	0.0201	0.4359	0.1584	0.4348	0.6261	0.8939	0.4778	0.0402	0.2182	0.5456	0.3247	0.13	0.1536	0.1348	0.1782	0.0537	0.0817	0.6371	0.8257
	140			N,N,N-trimethyl-5-aminovalerate	LC/MS pos early	57687			14274897					0.73	1.08	0.72	0.72	0.34	1.49	0.99	0.99	0.46	0.66	0.66	0.31	1	0.47	0.47		0.0045	0.0379	0.0108	0.0092	0.5212	0.6261	0.4928	0.3273	0.4903	0.5237	0.3464	0.2418	0.2206	0.2005	0.0011	0.0073	0.1731	0.1702	0.7956	0.8407
	142		Phenylalanine Metabolism	phenylalanine	LC/MS pos early	64	C00079	HMDB0000159	6140					0.81	0.87	0.81	0.99	0.82	1.08	1	1.23	1.02	0.93	1.14	0.95	1.23	1.02	0.83		0.5787	0.2422	0.0288	0.0194	0.6205	0.6447	0.0905	0.1155	0.2218	0.3956	0.0877	0.1015	0.9943	0.4393	0.1005	0.1523	0.6225	0.3533	0.9874	0.8634
	144			N-acetylphenylalanine	LC/MS neg	33950	C03519	HMDB0000512	74839					0.39	0.8	0.51	1.16	0.53	2.07	1.32	3	1.38	0.64	1.45	0.67	2.27	1.04	0.46		0.6973	0.2725	0.0152	0.0119	0.4337	0.6261	0.0231	0.0461	0.2619	0.4219	0.1047	0.1129	0.9621	0.4314	0.1264	0.1713	0.2256	0.2018	0.4834	0.7971
	155			phenylpyruvate	LC/MS neg	566	C00166	HMDB0000205	997					1.04	1.04	0.78	1.44	0.82	1	0.75	1.38	0.78	0.75	1.38	0.79	1.84	1.05	0.57		0.5256	0.2281	0.1017	0.0511	0.113	0.6099	0.7469	0.4318	0.9176	0.6581	0.4935	0.3015	0.0957	0.1335	0.3556	0.3267	0.6702	0.3714	0.3159	0.7701
	156			phenyllactate (PLA)	LC/MS neg	22130	C05607	HMDB0000779 HMDB0000563	3848					0.7	0.73	0.71	0.81	0.88	1.04	1.01	1.15	1.25	0.97	1.11	1.2	1.14	1.25	1.09		0.4807	0.2197	0.5977	0.199	0.2555	0.6099	0.1083	0.1297	0.0923	0.3086	0.1105	0.1168	0.1453	0.1622	0.397	0.3483	0.9344	0.4442	0.9919	0.8658
	160			phenylacetate	LC/MS neg	57745	C07086	HMDB0000209	999					0.5	0.54	0.35	1.21	0.66	1.07	0.69	2.39	1.31	0.65	2.25	1.23	3.45	1.89	0.55		0.0069	0.0423	0.0734	0.0402	0.5337	0.6261	0.1371	0.1519	0.0258	0.1933	0.0185	0.0383	0.4891	0.2989	0.4106	0.3502	0.4258	0.2871	0.3499	0.7908
	161			2-hydroxyphenylacetate	LC/MS polar	1432	C05852	HMDB0000669	11970					0.89	0.81	0.47	1.46	1.05	0.91	0.53	1.63	1.18	0.58	1.8	1.3	3.11	2.24	0.72		0.0142	0.0471	0.3319	0.128	0.8411	0.6778	0.9317	0.4877	0.2026	0.3802	0.0424	0.0655	0.4443	0.2824	0.97	0.5435	0.2336	0.2065	0.0511	0.5238
	164			4-hydroxyphenylacetate	LC/MS neg	541	C00642	HMDB0000020	127					0.78	0.65	0.6	1.21	1.25	0.83	0.77	1.56	1.61	0.93	1.87	1.93	2.02	2.08	1.03		0.0089	0.0443	0.9935	0.289	0.7103	0.6492	0.5246	0.3456	0.0827	0.3002	0.1034	0.1117	0.7505	0.3712	0.4091	0.35	0.2609	0.2174	0.3105	0.7701
	167		Tyrosine Metabolism	tyrosine	LC/MS pos early	1299	C00082	HMDB0000158	6057					0.7	0.77	0.74	1.09	0.84	1.1	1.05	1.56	1.19	0.96	1.42	1.09	1.48	1.14	0.77		0.1291	0.107	0.0697	0.0389	0.4856	0.6261	0.1356	0.1518	0.1105	0.3262	0.093	0.1044	0.5617	0.3201	0.3071	0.301	0.9134	0.4392	0.8433	0.8419
	168			N-acetyltyrosine	LC/MS neg	32390		HMDB0000866	68310					0.65	0.76	0.73	1.4	1.12	1.18	1.13	2.16	1.73	0.96	1.84	1.47	1.92	1.54	0.8		0.1103	0.0994	0.8666	0.2624	0.4047	0.6261	0.5797	0.366	0.0597	0.2592	0.4635	0.2919	0.7514	0.3712	0.9745	0.5435	0.1744	0.1706	0.8565	0.8419
	180			4-hydroxyphenylpyruvate	LC/MS neg	1669	C01179	HMDB0000707	979					0.85	0.53	0.25	0.83	0.55	0.63	0.29	0.98	0.65	0.47	1.56	1.03	3.33	2.2	0.66		0.0003	0.0106	0.0497	0.0298	0.51	0.6261	0.7939	0.4483	0.0232	0.1932	0.0001	0.0021	0.6109	0.3334	0.0677	0.1176	0.042	0.0709	0.0003	0.081
	186			3-(4-hydroxyphenyl)lactate	LC/MS neg	32197	C03672	HMDB0000755	9378					0.78	0.63	0.67	0.93	0.93	0.81	0.86	1.19	1.2	1.07	1.47	1.48	1.38	1.39	1.01		0.0309	0.062	0.7588	0.2366	0.5479	0.6261	0.3033	0.2481	0.0201	0.1932	0.0585	0.0786	0.6277	0.3379	0.6494	0.4477	0.1737	0.1704	0.3688	0.7908
	195			phenol sulfate	LC/MS neg	32553	C02180	HMDB0060015	74426					0.52	0.64	0.63	0.4	0.26	1.22	1.21	0.76	0.5	0.99	0.62	0.41	0.63	0.42	0.66		0.0005	0.013	0.4022	0.1493	0.8788	0.684	0.3812	0.2845	0.5884	0.5534	0.4699	0.2936	0.0051	0.0618	0.0017	0.0103	0.7354	0.3872	0.8767	0.8419
	196			phenol glucuronide	LC/MS neg	52747		HMDB0060014	87235					0.28	0.43	0.45	0.38	0.12	1.5	1.57	1.34	0.4	1.05	0.9	0.27	0.86	0.26	0.3		0.0196	0.0517	0.0892	0.0464	0.25	0.6099	0.0378	0.0643	0.03	0.2009	0.0507	0.072	0.0128	0.0791	0.0007	0.0054	0.918	0.4404	0.8936	0.8419
	209			3-methoxytyrosine	LC/MS pos early	12017		HMDB0001434	9307					1.07	0.89	0.95	0.83	0.84	0.83	0.88	0.77	0.78	1.06	0.93	0.94	0.87	0.89	1.02		0.1829	0.1227	0.6222	0.2056	0.96	0.7072	0.628	0.3864	0.6788	0.5904	0.8974	0.4529	0.2692	0.2222	0.3062	0.3008	0.3709	0.2646	0.5401	0.8085
	226			homovanillate sulfate	LC/MS neg	38349		HMDB11719	29981063					0.82	0.89	0.61	0.75	0.83	1.09	0.74	0.91	1.01	0.68	0.84	0.93	1.23	1.37	1.11		0.3017	0.1631	0.6799	0.2211	0.5596	0.6261	0.6306	0.3875	0.3986	0.4924	0.0958	0.1065	0.1651	0.1736	0.4311	0.3601	0.7141	0.3817	0.2284	0.7205
	230			p-cresol glucuronide*	LC/MS neg	48841		HMDB0011686	154035					0.51	1.23	0.6	0.44	0	2.42	1.18	0.87	0.01	0.49	0.36	0	0.74	0.01	0.01		0.1072	0.0975	0.1289	0.0619	0.8952	0.69	0.4222	0.2972	0.6793	0.5904	0.8439	0.436	0.4437	0.2824	0.0488	0.0961	0.2272	0.2025	0.5434	0.8102
	232			N-formylphenylalanine	LC/MS neg	48433		HMDB0240317	7064571;759256					0.68	0.73	0.9	0.87	0.7	1.07	1.32	1.28	1.03	1.23	1.2	0.96	0.97	0.78	0.81		0.8816	0.3222	0.4671	0.1671	0.5605	0.6261	0.2706	0.2338	0.2725	0.4272	0.4789	0.2958	0.6535	0.3455	0.3212	0.3073	0.9964	0.4623	0.6891	0.8401
	237			4-hydroxyphenylacetate sulfate	LC/MS neg	53027								0.72	0.67	0.74	1.23	1.25	0.93	1.02	1.7	1.72	1.1	1.84	1.86	1.67	1.68	1.01		0.3138	0.167	0.5318	0.1812	0.6012	0.638	0.73	0.4255	0.358	0.4915	0.5664	0.3352	0.8381	0.3995	0.3831	0.343	0.5633	0.3366	0.8187	0.8407
	250			thyroxine	LC/MS neg	2761	C01829	HMDB0000248	5819					1.12	1.11	1.39	1.11	1.43	0.99	1.25	1	1.29	1.26	1.01	1.3	0.8	1.03	1.29		0.1389	0.1094	0.0127	0.0103	0.7398	0.653	0.3764	0.2834	0.3711	0.4921	0.0135	0.0319	0.5133	0.3064	0.013	0.0422	0.992	0.4612	0.0971	0.6317
	259		Tryptophan Metabolism	tryptophan	LC/MS pos early	54	C00078	HMDB0000929	6305					0.75	0.98	0.81	1.07	0.79	1.3	1.07	1.41	1.05	0.82	1.09	0.8	1.32	0.98	0.74		0.6986	0.2726	5.3493e-05	0.0001	0.7192	0.6492	0.0087	0.0254	0.7872	0.6171	0.0282	0.0506	0.4564	0.2879	0.022	0.0581	0.017	0.0408	0.6292	0.8241
	260			N-acetyltryptophan	LC/MS neg	33959	C03137	HMDB0013713	439917;700653					0.5	0.85	0.8	1.19	0.67	1.7	1.6	2.39	1.35	0.94	1.4	0.79	1.49	0.84	0.56		0.4613	0.214	0.0045	0.0045	0.2988	0.6099	0.0131	0.0317	0.5761	0.5525	0.3006	0.2205	0.5145	0.3066	0.1438	0.1873	0.0482	0.0763	0.1276	0.6579
	266			C-glycosyltryptophan	LC/MS neg	48782		HMDB0240296	10981970					1.09	0.77	0.74	0.73	1.03	0.71	0.68	0.67	0.95	0.96	0.95	1.34	0.99	1.4	1.41		0.001	0.0206	0.052	0.0308	0.0567	0.6099	0.5315	0.347	0.0201	0.1932	0.0102	0.0271	0.0079	0.064	0.7547	0.4856	0.0041	0.0163	0.0019	0.2034
	268			oxindolylalanine	LC/MS pos early	64568			20977764					0.62	1.2	1.6	1.24	0.83	1.94	2.57	2	1.33	1.32	1.03	0.69	0.78	0.52	0.66		0.0131	0.0471	0.1579	0.0718	0.1009	0.6099	0.0458	0.0728	0.4845	0.5211	0.1114	0.1168	0.5796	0.3234	0.4315	0.3601	0.0087	0.0269	0.0007	0.1408
	272			kynurenine	LC/MS pos early	15140	C00328	HMDB0000684	161166					0.64	1.03	0.75	1.07	0.73	1.62	1.19	1.68	1.15	0.73	1.04	0.71	1.42	0.97	0.68		0.3275	0.1706	1.1596e-05	3.885e-05	0.8999	0.6909	0.0024	0.0118	0.5405	0.5423	0.0533	0.0746	0.461	0.2891	0.0358	0.0782	0.0004	0.0033	0.2129	0.7205
	275			N-acetylkynurenine (2)	LC/MS neg	48757		HMDB0240342	73817779					0.54	0.91	0.67	1.21	0.77	1.67	1.23	2.23	1.42	0.74	1.34	0.85	1.81	1.15	0.64		0.2471	0.1452	0.0045	0.0045	0.6858	0.6469	0.0231	0.0461	0.91	0.6574	0.2187	0.1748	0.3833	0.2633	0.3987	0.3483	0.03	0.0568	0.2698	0.7483
	277			kynurenate	LC/MS neg	1417	C01717	HMDB0000715	3845					1.06	1.01	1.04	1.01	1.25	0.95	0.98	0.95	1.18	1.04	1	1.24	0.97	1.2	1.24		0.8597	0.3172	0.3639	0.1384	0.863	0.6818	0.7172	0.421	0.987	0.6763	0.8112	0.4267	0.9951	0.4393	0.3412	0.3187	0.7052	0.3778	0.9017	0.8419
	279			N-formylanthranilic acid	LC/MS polar	43549	C05653	HMDB0004089	101399					0.63	0.93	0.78	1.12	0.87	1.49	1.25	1.8	1.4	0.84	1.21	0.94	1.43	1.11	0.78		0.273	0.1547	0.014	0.0111	0.7302	0.6501	0.0406	0.0674	0.9383	0.664	0.2696	0.2024	0.4612	0.2891	0.5769	0.4253	0.0481	0.0763	0.3228	0.7731
	280			anthranilate	LC/MS pos early	4970	C00108	HMDB0001123	227					0.72	0.57	0.62	0.87	0.87	0.79	0.85	1.2	1.2	1.08	1.52	1.52	1.41	1.41	1		0.0048	0.0379	0.4711	0.1676	0.1816	0.6099	0.0631	0.092	0.0017	0.068	0.0095	0.0261	0.392	0.2652	0.3924	0.3453	0.1481	0.1542	0.4163	0.7971
	283			xanthurenate	LC/MS pos early	15679	C02470	HMDB0000881	5699					1.26	0.93	1.05	0.92	1.82	0.74	0.84	0.73	1.45	1.13	0.99	1.96	0.87	1.73	1.97		0.4894	0.2202	0.0082	0.0073	0.1863	0.6099	0.2754	0.2362	0.7515	0.6088	0.7662	0.4112	0.4678	0.2923	0.0223	0.0583	0.1623	0.1628	0.4244	0.7971
	287			picolinate	LC/MS pos early	1512	C10164	HMDB0002243	1018					0.57	0.83	0.72	0.81	0.65	1.44	1.25	1.41	1.13	0.87	0.98	0.78	1.13	0.91	0.8		0.7091	0.2762	0.0122	0.0101	0.3203	0.6187	0.0095	0.0267	0.4216	0.5031	0.0562	0.0771	0.1279	0.1529	0.0324	0.0727	0.0616	0.0874	0.4468	0.7971
	292			serotonin	LC/MS pos early	2342	C00780	HMDB0000259	5202					1.11	0.84	0.73	0.81	0.77	0.76	0.66	0.73	0.69	0.87	0.96	0.91	1.11	1.05	0.95		0.1885	0.1243	0.9321	0.2763	0.9711	0.7081	0.9625	0.4963	0.4358	0.5048	0.3073	0.2227	0.2091	0.1967	0.2275	0.2522	0.4089	0.2818	0.286	0.7483
	295			5-hydroxyindoleacetate	LC/MS neg	437	C05635	HMDB0000763	1826					0.72	0.65	0.58	0.66	1.23	0.91	0.81	0.93	1.71	0.89	1.02	1.88	1.14	2.11	1.85		0.0871	0.0883	0.9424	0.2787	0.1316	0.6099	0.1926	0.1891	0.0394	0.2182	0.0293	0.0518	0.08	0.1241	0.8312	0.5012	0.4233	0.2865	0.3521	0.7908
	303			indolelactate	LC/MS neg	18349	C02043	HMDB0000671	92904					0.78	0.85	0.88	0.79	0.96	1.09	1.13	1.01	1.23	1.04	0.93	1.13	0.9	1.09	1.21		0.8938	0.3242	0.8648	0.2624	0.0682	0.6099	0.0695	0.0976	0.2054	0.3828	0.2238	0.1769	0.0625	0.1162	0.6917	0.4623	0.5644	0.3367	0.5304	0.8015
	304			indoleacetate	LC/MS neg	27513	C00954	HMDB0000197	802					0.84	0.75	0.5	0.84	0.85	0.9	0.59	1	1.02	0.66	1.11	1.13	1.69	1.72	1.02		0.0358	0.0671	0.4262	0.1558	0.6481	0.6447	0.6542	0.3975	0.1368	0.3453	0.0117	0.0296	0.3867	0.2636	0.4978	0.39	0.2917	0.2325	0.034	0.4708
	309			indoleacrylate	LC/MS neg	22114		HMDB0000734	5375048					0.55	0.78	0.69	0.78	0.47	1.42	1.26	1.42	0.85	0.89	1	0.6	1.13	0.67	0.59		0.6569	0.2637	0.0064	0.006	0.7469	0.6541	0.0358	0.0617	0.3582	0.4915	0.0496	0.0711	0.3884	0.264	0.0134	0.0431	0.2194	0.1973	0.8822	0.8419
	310			indolepropionate	LC/MS pos early	32405		HMDB0002302	3744					0.42	0.7	0.21	0.99	0.4	1.67	0.49	2.34	0.94	0.3	1.41	0.57	4.74	1.91	0.4		0.0093	0.0443	1.6191e-05	4.9831e-05	0.3726	0.6231	0.0145	0.034	0.2163	0.3922	6.8672e-06	0.0004	0.8429	0.4012	0.0305	0.0699	0.1986	0.1853	0.0108	0.3345
	321			indole-3-carboxylate	LC/MS neg	38116	C19837	HMDB0003320	69867					0.86	0.58	0.68	1.01	0.97	0.68	0.8	1.18	1.13	1.17	1.73	1.66	1.48	1.42	0.96		0.0002	0.0106	0.86	0.2616	0.3699	0.6231	0.3605	0.2765	0.0015	0.068	0.0205	0.0414	0.7269	0.3673	0.956	0.5394	0.0162	0.0399	0.1431	0.6706
	323			indoleacetylglycine	LC/MS neg	54730			446640					0.46	0.63	0.51	0.63	0.54	1.37	1.1	1.35	1.17	0.8	0.99	0.86	1.23	1.06	0.87		0.1793	0.1216	0.0032	0.0035	0.0321	0.6099	0.0003	0.0027	0.0112	0.1604	0.0005	0.004	0.0061	0.0618	0.0028	0.0144	0.1879	0.18	0.8551	0.8419
	327			3-indoxyl sulfate	LC/MS neg	27672		HMDB0000682	10258					0.7	0.95	0.63	0.65	0.76	1.35	0.89	0.93	1.08	0.66	0.69	0.8	1.04	1.21	1.17		0.3711	0.1869	0.0507	0.0303	0.1314	0.6099	0.1411	0.1541	0.9474	0.6672	0.0171	0.0365	0.0554	0.1139	0.1317	0.1755	0.159	0.1608	0.3255	0.7756
	328			indoxyl glucuronide	LC/MS neg	52749		HMDB0010319	2733785					0.65	0.59	0.47	0.76	0.75	0.92	0.72	1.17	1.16	0.79	1.28	1.26	1.62	1.6	0.99		0.0932	0.0899	0.4882	0.171	0.7727	0.6585	0.3591	0.2765	0.0827	0.3002	0.0377	0.061	0.4195	0.2753	0.4715	0.3808	0.3976	0.2762	0.227	0.7205
	337		Leucine, Isoleucine and Valine Metabolism	leucine	LC/MS pos early	60	C00123	HMDB0000687	6106					0.79	1	0.91	0.93	0.76	1.26	1.15	1.18	0.96	0.91	0.94	0.76	1.03	0.84	0.81		0.1197	0.1041	0.0005	0.0007	0.3626	0.6211	0.0053	0.0189	0.9334	0.6627	0.2586	0.1963	0.4385	0.2818	0.0015	0.0095	0.0066	0.0229	0.0768	0.5824
	341			N-acetylleucine	LC/MS neg	1587	C02710	HMDB0011756	70912					0.7	0.79	0.67	1.05	0.68	1.14	0.96	1.5	0.97	0.84	1.32	0.85	1.56	1.01	0.65		0.5169	0.2262	0.0239	0.017	0.6917	0.6482	0.1262	0.1428	0.2306	0.4008	0.0662	0.0851	0.9887	0.4387	0.0715	0.1213	0.7311	0.386	0.7444	0.8407
	348			4-methyl-2-oxopentanoate	LC/MS neg	22116	C00233	HMDB0000695	70					0.96	0.93	0.74	1.59	0.85	0.96	0.77	1.65	0.88	0.8	1.72	0.92	2.14	1.14	0.54		0.1432	0.1103	0.0711	0.0394	0.1879	0.6099	0.9882	0.5025	0.9205	0.6588	0.4352	0.2813	0.0319	0.1002	0.7546	0.4856	0.9088	0.4385	0.4267	0.7971
	352			alpha-hydroxyisocaproate	LC/MS neg	22132	C03264	HMDB0000665 HMDB0000624 HMDB00746	92779;83697;439960					0.95	0.78	0.94	0.94	1.16	0.82	0.98	0.99	1.22	1.2	1.21	1.49	1	1.24	1.24		0.2397	0.143	0.2686	0.108	0.5024	0.6261	0.7637	0.4377	0.0938	0.3086	0.6577	0.3692	0.6736	0.3496	0.5857	0.4262	0.1647	0.1642	0.8864	0.8419
	356			isovalerate (i5:0)	LC/MS neg	44656	C08262	HMDB0000718	10430					0.86	0.75	0.68	1.19	0.92	0.88	0.8	1.39	1.07	0.91	1.58	1.22	1.74	1.35	0.77		0.1516	0.1131	0.5389	0.1826	0.8431	0.678	0.8546	0.4659	0.4369	0.5048	0.4035	0.2666	0.3193	0.2401	0.859	0.5106	0.5512	0.3325	0.513	0.8015
	358			isovalerylglycine	LC/MS neg	35107		HMDB00678	546304					0.87	1.33	1.34	0.98	1.15	1.53	1.54	1.13	1.32	1.01	0.74	0.87	0.73	0.86	1.17		0.1856	0.1239	0.6655	0.2169	0.6297	0.6447	0.5949	0.3721	0.4537	0.5096	0.1848	0.1575	0.9495	0.4294	0.5306	0.4063	0.204	0.187	0.0671	0.5502
	359			isovalerylcarnitine (C5)	LC/MS pos early	34407	C20826	HMDB0000688	169235					1.23	1.07	1.02	1.12	1.31	0.87	0.83	0.91	1.06	0.95	1.05	1.22	1.1	1.28	1.17		0.3412	0.176	0.3452	0.1322	0.3018	0.6099	0.1431	0.1549	0.6299	0.5766	0.8513	0.4373	0.4403	0.2824	0.1151	0.1637	0.3187	0.2453	0.1005	0.6317
	366			3-methylcrotonylglycine	LC/MS pos early	31940	C20828	HMDB0000459	169485					1.14	1.07	1.05	1.06	1.49	0.94	0.92	0.93	1.31	0.99	1	1.4	1.01	1.41	1.4		0.4878	0.2202	0.2467	0.1005	0.4907	0.6261	0.5441	0.351	0.9248	0.6595	0.9671	0.4738	0.9326	0.4272	0.1079	0.1586	0.6081	0.3494	0.5173	0.8015
	368			beta-hydroxyisovalerate	LC/MS neg	12129		HMDB0000754	69362					0.72	0.65	0.58	0.85	0.83	0.91	0.8	1.19	1.16	0.89	1.31	1.28	1.47	1.44	0.98		0.0224	0.0559	0.2073	0.0882	0.4928	0.6261	0.0965	0.1193	0.0163	0.1763	0.0058	0.0204	0.3252	0.2423	0.2769	0.2848	0.4214	0.2857	0.2288	0.7205
	369			beta-hydroxyisovaleroylcarnitine	LC/MS pos early	35433								1.4	1.16	1.21	1.4	1.91	0.83	0.86	1	1.36	1.04	1.21	1.64	1.16	1.58	1.36		0.2293	0.1402	0.059	0.0339	0.5638	0.6275	0.1105	0.1313	0.6139	0.5711	0.4536	0.2878	0.3052	0.238	0.0158	0.0476	0.267	0.2203	0.3854	0.7971
	372			3-methylglutaconate	LC/MS polar	57747		HMDB0000522	1551553					0.85	0.62	0.73	0.81	0.91	0.73	0.86	0.96	1.08	1.18	1.31	1.47	1.11	1.24	1.13		0.0964	0.0913	0.5756	0.1927	0.3554	0.6211	0.3941	0.2888	0.0199	0.1932	0.1214	0.1215	0.1016	0.1374	0.4954	0.3894	0.1244	0.1402	0.4737	0.7971
	390			isoleucine	LC/MS pos early	1125	C16424 C00407 C06418	HMDB0000172	6306					0.84	1.03	0.91	1.02	0.84	1.23	1.09	1.22	1	0.88	0.99	0.81	1.12	0.92	0.82		0.5056	0.2242	0.0005	0.0008	0.7099	0.6492	0.0233	0.0461	0.7252	0.6038	0.2444	0.1878	0.7954	0.3845	0.0211	0.057	0.0099	0.0291	0.243	0.743
	392			N-acetylisoleucine	LC/MS neg	33967		HMDB0061684	306109					0.78	0.82	0.72	0.95	0.67	1.06	0.93	1.23	0.87	0.87	1.16	0.82	1.33	0.94	0.71		0.4882	0.2202	0.0247	0.0174	0.8189	0.6727	0.1432	0.1549	0.2799	0.4338	0.0591	0.0788	0.5571	0.3183	0.027	0.0648	0.6919	0.376	0.6538	0.8257
	399			3-methyl-2-oxovalerate	LC/MS neg	15676	C00671 C06008 C03465	HMDB0000491	440877;439286					1.01	0.88	0.79	1.32	0.77	0.87	0.78	1.31	0.77	0.9	1.5	0.88	1.67	0.98	0.59		0.3651	0.1847	0.0906	0.047	0.1578	0.6099	0.9075	0.4812	0.66	0.5875	0.3208	0.2299	0.1393	0.1591	0.2992	0.2974	0.5786	0.3408	0.2686	0.7483
	400			2-hydroxy-3-methylvalerate	LC/MS neg	36746		HMDB0000317	164623					1.36	1	1.34	1.12	1.73	0.73	0.98	0.82	1.27	1.34	1.12	1.73	0.84	1.29	1.55		0.1566	0.1149	0.0002	0.0003	0.8106	0.6719	0.0236	0.0465	0.9395	0.664	0.0425	0.0655	0.3872	0.2636	0.0005	0.0048	0.0282	0.0543	0.7966	0.8407
	402			2-methylbutyrylcarnitine (C5)	LC/MS pos early	45095		HMDB0000378	6426901					1.24	0.42	0.99	0.64	1.01	0.34	0.79	0.52	0.82	2.36	1.54	2.43	0.65	1.03	1.57		0.0317	0.0622	0.0061	0.0058	0.5441	0.6261	0.385	0.2845	0.0099	0.1528	0.7878	0.4189	0.2438	0.2119	0.602	0.4305	0.0009	0.0059	0.2574	0.7483
	404			2-methylbutyrylglycine	LC/MS neg	31928		HMDB0000339	193872					1.22	1.08	1.13	0.74	1.45	0.89	0.93	0.61	1.19	1.05	0.69	1.34	0.66	1.28	1.95		0.8077	0.3024	0.0099	0.0085	0.1857	0.6099	0.2651	0.2303	0.9693	0.6742	0.6334	0.3632	0.168	0.1753	0.106	0.1572	0.2493	0.2134	0.5191	0.8015
	407			tigloylglycine	LC/MS pos early	1598		HMDB0000959	6441567					1.16	1.01	0.99	0.98	1.62	0.87	0.85	0.84	1.4	0.98	0.97	1.6	0.99	1.64	1.66		0.4544	0.2124	0.1071	0.0533	0.4704	0.6261	0.4121	0.2946	0.816	0.6285	0.9294	0.4632	0.8263	0.3952	0.1044	0.1563	0.2943	0.2335	0.3642	0.7908
	410			3-hydroxy-2-ethylpropionate	LC/MS neg	32397		HMDB0000396	188979					1.64	0.78	1.35	0.89	1.38	0.47	0.82	0.54	0.84	1.74	1.14	1.78	0.66	1.02	1.56		0.1726	0.1202	5.0772e-06	1.9476e-05	0.9177	0.6957	0.0059	0.0199	0.1262	0.3388	0.0705	0.0887	0.3474	0.2474	0.0572	0.1054	7.0198e-05	0.0009	0.2954	0.7556
	412			ethylmalonate	LC/MS polar	15765		HMDB0000622	11756					1.06	1.08	0.95	1.01	1.11	1.03	0.9	0.95	1.05	0.88	0.93	1.03	1.06	1.17	1.11		0.7324	0.2834	0.6621	0.2161	0.0931	0.6099	0.3024	0.248	0.1807	0.3647	0.8316	0.4329	0.703	0.3598	0.1015	0.1533	0.7517	0.3918	0.2156	0.7205
	415			methylsuccinate	LC/MS polar	15745		HMDB0001844	10349					0.72	0.87	0.67	0.9	0.72	1.21	0.94	1.25	1	0.78	1.04	0.83	1.33	1.07	0.8		0.4893	0.2202	0.0017	0.0021	0.8323	0.676	0.0193	0.0404	0.2459	0.4079	0.0052	0.019	0.3921	0.2652	0.0168	0.0498	0.2119	0.1922	0.6018	0.8166
	421			valine	LC/MS pos early	1649	C00183	HMDB0000883	6287					0.72	0.88	0.78	0.83	0.7	1.21	1.08	1.15	0.96	0.89	0.95	0.79	1.06	0.89	0.84		0.2372	0.143	0.0015	0.002	0.3467	0.6211	0.0033	0.0145	0.2105	0.3877	0.0218	0.0429	0.065	0.1162	0.001	0.0073	0.0699	0.0933	0.4613	0.7971
	422			N-acetylvaline	LC/MS neg	1591		HMDB0011757	66789					0.87	0.79	0.81	0.97	0.78	0.91	0.94	1.12	0.9	1.03	1.22	0.99	1.19	0.96	0.81		0.2832	0.1565	0.1834	0.0806	0.5113	0.6261	0.293	0.2431	0.0889	0.3086	0.1183	0.1196	0.7492	0.3711	0.0882	0.1404	0.5002	0.315	0.5974	0.8166
	428			3-methyl-2-oxobutyrate	LC/MS neg	44526	C00141	HMDB0000019	49					1.03	0.91	0.78	1.27	0.82	0.88	0.75	1.22	0.79	0.86	1.39	0.9	1.63	1.05	0.65		0.1829	0.1227	0.0731	0.0402	0.1313	0.6099	0.7341	0.4271	0.6292	0.5766	0.1575	0.1414	0.1421	0.1599	0.2861	0.2913	0.4123	0.2832	0.0825	0.5922
	429			alpha-hydroxyisovalerate	LC/MS polar	46537		HMDB0000407	99823					1.53	1.12	1.38	0.96	1.46	0.74	0.9	0.63	0.95	1.22	0.85	1.3	0.7	1.06	1.52		0.6402	0.2594	1.3444e-06	6.8432e-06	0.2259	0.6099	0.0003	0.0027	0.3018	0.4498	0.0056	0.0197	0.5384	0.312	0.0014	0.0088	0.0051	0.0189	0.2888	0.7483
	431			isobutyrylcarnitine (C4)	LC/MS pos early	33441		HMDB0000736	168379					1.41	0.84	0.98	0.91	1.18	0.6	0.7	0.65	0.84	1.16	1.08	1.4	0.93	1.21	1.29		0.1321	0.1078	0.0619	0.0352	0.5531	0.6261	0.0906	0.1155	0.4796	0.5187	0.6412	0.3641	0.6408	0.3417	0.3828	0.343	0.0191	0.0438	0.0337	0.4708
	432			isobutyrylglycine	LC/MS neg	35437		HMDB0000730	10855600					0.8	0.76	0.71	0.54	0.61	0.96	0.9	0.68	0.77	0.93	0.71	0.8	0.76	0.86	1.13		0.1479	0.1121	0.7322	0.2335	0.5093	0.6261	0.2781	0.237	0.2354	0.4024	0.2257	0.1774	0.0317	0.1002	0.0968	0.1497	0.9166	0.4403	0.8962	0.8419
	433			3-hydroxyisobutyrate	LC/MS polar	1549	C01188 C06001	HMDB0000023 HMDB0000336	11966314					0.58	0.62	0.64	0.7	0.64	1.07	1.1	1.21	1.11	1.03	1.13	1.04	1.09	1.01	0.92		0.3938	0.1941	0.1692	0.0751	0.1202	0.6099	0.0162	0.0367	0.0315	0.2011	0.056	0.0771	0.0502	0.1139	0.0346	0.0763	0.7768	0.3992	0.5867	0.8156
	434			2,3-dihydroxy-2-methylbutyrate	LC/MS polar	57547		HMDB0029576	301941					0.65	0.79	0.62	0.56	0.66	1.21	0.95	0.87	1.02	0.78	0.72	0.84	0.91	1.07	1.17		0.1195	0.1041	0.1827	0.0805	0.0881	0.6099	0.033	0.058	0.1621	0.3647	0.0161	0.0356	0.0039	0.058	0.0407	0.0858	0.435	0.2893	0.7592	0.8407
	440		Methionine, Cysteine, SAM and Taurine Metabolism	methionine	LC/MS pos early	1302	C00073	HMDB0000696	6137					0.62	0.8	0.62	0.71	0.6	1.28	1	1.14	0.96	0.78	0.89	0.75	1.14	0.96	0.84		0.1068	0.0974	0.0001	0.0002	0.2071	0.6099	0.0004	0.0033	0.061	0.2592	0.0003	0.003	0.0093	0.0683	0.0002	0.0023	0.056	0.0834	0.9049	0.8419
	441			N-acetylmethionine	LC/MS neg	1589	C02712	HMDB0011745	448580					0.88	0.79	0.82	0.92	0.86	0.9	0.93	1.05	0.98	1.04	1.16	1.09	1.12	1.05	0.94		0.5643	0.2375	0.7448	0.2344	0.8986	0.6909	0.9175	0.4853	0.401	0.4924	0.4507	0.2872	0.9557	0.4294	0.5476	0.4125	0.4608	0.3013	0.5145	0.8015
	443			N-formylmethionine	LC/MS neg	2829	C03145	HMDB0001015	439750					1.16	0.87	0.99	0.83	1.18	0.75	0.85	0.71	1.01	1.13	0.94	1.34	0.84	1.19	1.42		0.2787	0.1561	0.0365	0.0236	0.6536	0.6447	0.2923	0.243	0.3564	0.4915	0.8247	0.4312	0.2134	0.1971	0.4783	0.3837	0.0528	0.0812	0.2047	0.7154
	445			methionine sulfone	LC/MS pos early	44878		HMDB0062174	69961					0.15	0.53	0.39	0.74	0.17	3.49	2.59	4.91	1.12	0.74	1.41	0.32	1.89	0.43	0.23		0.6926	0.2716	3.0811e-07	1.8122e-06	0.1006	0.6099	9.8702e-06	0.0002	0.0769	0.2911	0.0005	0.004	0.1938	0.1881	1.3832e-05	0.0004	0.0021	0.0096	0.2	0.7154
	446			methionine sulfoxide	LC/MS pos early	18374	C02989	HMDB0002005	158980					0.39	0.7	0.65	0.82	0.4	1.79	1.66	2.1	1.03	0.92	1.17	0.57	1.27	0.62	0.49		0.5087	0.2242	0.0002	0.0004	0.0721	0.6099	0.0003	0.0026	0.0967	0.3086	0.0222	0.0434	0.1209	0.149	0.0004	0.0039	0.0247	0.0496	0.1056	0.6317
	447			N-acetylmethionine sulfoxide	LC/MS pos early	45428			11902949					0.6	0.8	0.84	1.13	0.67	1.33	1.4	1.89	1.11	1.05	1.42	0.83	1.35	0.79	0.59		0.8839	0.3226	0.1088	0.0538	0.3571	0.6211	0.1401	0.1534	0.3932	0.4921	0.5356	0.3196	0.7328	0.3682	0.2252	0.2519	0.5233	0.3248	0.383	0.7971
	452			S-adenosylhomocysteine (SAH)	LC/MS neg	42382	C00021	HMDB0000939	439155					1.26	1.05	1.17	1.21	1.08	0.83	0.93	0.96	0.86	1.12	1.16	1.03	1.04	0.93	0.89		0.9829	0.3448	0.4178	0.1538	0.4421	0.6261	0.2299	0.2109	0.8955	0.6554	0.387	0.2621	0.4502	0.2857	0.8285	0.5005	0.2833	0.2289	0.7316	0.8407
	453			5-methylthioribose**	LC/MS pos early	62100		HMDB0001087	6419710					1.32	1.16	1.06	1.17	1.36	0.88	0.81	0.89	1.04	0.92	1.01	1.18	1.1	1.29	1.17		0.1191	0.1041	0.0289	0.0194	0.012	0.5556	0.0033	0.0143	0.0931	0.3086	0.5896	0.3443	0.1154	0.1478	0.001	0.0073	0.1625	0.1628	0.0132	0.3557
	454			2,3-dihydroxy-5-methylthio-4-pentenoate (DMTPA)*	LC/MS neg	62805		HMDB0240388						0.71	0.79	0.74	0.72	0.74	1.12	1.05	1.02	1.05	0.94	0.91	0.94	0.97	1	1.03		0.151	0.113	0.092	0.0476	0.0437	0.6099	0.0041	0.0164	0.0259	0.1933	0.0088	0.0248	0.0033	0.058	0.0124	0.0413	0.465	0.3019	0.7712	0.8407
	455			2-hydroxy-4-(methylthio)butanoic acid	LC/MS polar	63739		HMDB0037115	11427					0.85	0.59	0.64	0.49	0.96	0.69	0.76	0.58	1.13	1.1	0.84	1.65	0.77	1.5	1.95		0.0055	0.0379	0.0864	0.0453	0.0221	0.6099	0.4447	0.3086	0.0051	0.1293	0.0202	0.0409	0.0004	0.0344	0.5471	0.4125	0.0333	0.0611	0.1061	0.6317
	459			cystathionine	LC/MS pos early	15705	C02291	HMDB0000099	439258					0.98	0.71	0.76	0.56	0.84	0.72	0.78	0.57	0.86	1.08	0.8	1.19	0.74	1.1	1.5		0.0076	0.0423	0.1147	0.0563	0.0881	0.6099	0.7168	0.421	0.0305	0.2011	0.0762	0.0935	0.0006	0.0412	0.317	0.3065	0.0672	0.0921	0.153	0.6777
	461			cysteine	LC/MS pos early	1868	C00097	HMDB0000574	5862					0.72	0.72	0.68	0.83	0.82	1	0.95	1.16	1.15	0.95	1.17	1.15	1.23	1.21	0.98		0.0544	0.0749	0.1313	0.0627	0.1427	0.6099	0.0187	0.0394	0.0124	0.163	0.0029	0.0127	0.0905	0.1311	0.1721	0.2129	0.8666	0.4307	0.472	0.7971
	463			S-methylcysteine	LC/MS polar	39592		HMDB0002108	88180;7058174;24417					0.63	1.08	0.81	1.2	0.75	1.7	1.28	1.9	1.19	0.75	1.12	0.7	1.49	0.93	0.63		0.3608	0.1835	0.0002	0.0004	0.4571	0.6261	0.0217	0.0441	0.6739	0.5904	0.2951	0.2175	0.1919	0.1876	0.0595	0.109	0.0077	0.0251	0.1892	0.7154
	464			S-methylcysteine sulfoxide	LC/MS pos early	43378		HMDB0029432	82142					0.5	1.08	0.76	1.18	0.64	2.18	1.52	2.38	1.3	0.7	1.09	0.59	1.56	0.85	0.54		0.3397	0.176	5.4833e-05	0.0001	0.5521	0.6261	0.0054	0.0189	0.6964	0.5951	0.1821	0.1558	0.3674	0.2576	0.028	0.0669	0.0019	0.009	0.1175	0.6571
	467			cysteine s-sulfate	LC/MS neg	22176	C05824	HMDB0000731	115015					0.49	0.8	0.36	1.19	0.84	1.65	0.73	2.43	1.73	0.44	1.48	1.05	3.35	2.37	0.71		0.0194	0.0516	0.011	0.0093	0.53	0.6261	0.1183	0.1374	0.5744	0.5525	0.0064	0.0208	0.4725	0.2938	0.9955	0.5486	0.3083	0.2395	0.2045	0.7154
	468			cystine	LC/MS polar	56	C00491	HMDB0000192	67678					0.86	1.52	1.01	0.59	1.05	1.76	1.17	0.68	1.22	0.66	0.39	0.69	0.58	1.04	1.79		0.0921	0.0896	0.3219	0.1247	0.2464	0.6099	0.3786	0.2834	0.2406	0.4034	0.6861	0.3815	0.1229	0.1492	0.4135	0.3515	0.0443	0.0726	0.6312	0.8241
	472			lanthionine	LC/MS pos early	42002			98504					1.03	0.44	0.8	0.64	1.19	0.42	0.78	0.62	1.16	1.84	1.47	2.72	0.8	1.48	1.86		0.0863	0.0878	0.0593	0.034	0.8068	0.6706	0.5498	0.3525	0.0663	0.2709	0.5375	0.3203	0.4014	0.2682	0.5207	0.4017	0.0172	0.0408	0.2281	0.7205
	474			cysteine sulfinic acid	LC/MS pos early	37443	C00606	HMDB0000996	109					0.71	0.97	0.79	0.58	0.69	1.38	1.12	0.83	0.97	0.81	0.6	0.71	0.74	0.87	1.18		0.0222	0.0559	0.1931	0.0838	0.1095	0.6099	0.0455	0.0726	0.9023	0.6565	0.2114	0.1712	0.0039	0.058	0.0372	0.0804	0.0592	0.0865	0.429	0.7971
	476			hypotaurine	LC/MS pos early	590	C00519	HMDB0000965	107812					1.34	0.39	0.82	0.99	1.54	0.29	0.61	0.74	1.15	2.09	2.54	3.94	1.22	1.88	1.55		0.0189	0.0516	0.4786	0.1689	0.8973	0.6908	0.716	0.421	0.0491	0.2368	0.2113	0.1712	0.9196	0.4223	0.8339	0.5016	0.0215	0.046	0.1098	0.6317
	477			taurine	LC/MS pos early	2125	C00245	HMDB0000251	1123					0.98	0.7	0.83	0.76	0.91	0.71	0.84	0.77	0.93	1.18	1.08	1.3	0.92	1.1	1.2		0.0001	0.0106	0.024	0.017	0.1877	0.6099	0.8689	0.4699	6.8528e-05	0.0141	0.027	0.0494	0.0021	0.0559	0.2176	0.2478	0.0001	0.0012	0.0392	0.4776
	479			N-acetyltaurine	LC/MS neg	48187		HMDB0240253	159864					0.98	0.81	1	0.75	0.97	0.83	1.03	0.77	0.99	1.23	0.92	1.19	0.75	0.96	1.29		0.2601	0.1492	0.0687	0.0385	0.4005	0.6261	0.9763	0.4997	0.1034	0.3157	0.8999	0.4537	0.0525	0.1139	0.7891	0.4919	0.1095	0.1298	0.9235	0.8477
	482			succinoyltaurine	LC/MS polar	63678								0.94	1.1	0.87	0.86	0.87	1.17	0.92	0.91	0.92	0.79	0.78	0.79	0.98	0.99	1.01		0.4332	0.208	0.5166	0.1779	0.6681	0.6447	0.8581	0.4668	0.6542	0.5867	0.5257	0.3158	0.3422	0.2459	0.4149	0.3522	0.5316	0.3277	0.6478	0.8257
	490		Urea cycle; Arginine and Proline Metabolism	arginine	LC/MS pos early	1638	C00062	HMDB0000517	6322					1.16	1.03	1.25	0.8	0.95	0.89	1.08	0.69	0.82	1.21	0.78	0.93	0.64	0.76	1.19		0.1738	0.1204	0.0401	0.0254	0.9353	0.7011	0.1618	0.1671	0.6679	0.5878	0.0875	0.1015	0.494	0.2989	0.807	0.4956	0.326	0.2477	0.7447	0.8407
	491			argininosuccinate	LC/MS pos early	15497	C03406	HMDB0000052	60150382					1.08	0.94	1.57	1.31	1.09	0.86	1.45	1.21	1.01	1.68	1.4	1.17	0.83	0.69	0.83		0.6638	0.2652	0.4047	0.1498	0.3286	0.6211	0.5625	0.3582	0.6807	0.5904	0.2825	0.2093	0.2432	0.2119	0.5815	0.4253	0.3243	0.2477	0.6155	0.8166
	492			urea	LC/MS pos early	1670	C00086	HMDB0000294	1176					0.92	0.88	1	0.72	0.87	0.95	1.09	0.78	0.94	1.14	0.83	0.99	0.72	0.86	1.2		0.0232	0.0566	0.3701	0.1395	0.3016	0.6099	0.4566	0.3114	0.264	0.423	0.9177	0.4603	0.0063	0.0618	0.1161	0.1637	0.7045	0.3778	0.5208	0.8015
	494			ornithine	LC/MS pos early	1493	C00077	HMDB0000214	6262					0.5	0.94	0.63	1.03	0.79	1.86	1.24	2.03	1.57	0.67	1.09	0.84	1.64	1.26	0.77		0.1418	0.1103	0.0001	0.0002	0.4224	0.6261	0.0012	0.0074	0.8638	0.6444	0.0167	0.0364	0.6413	0.3417	0.243	0.2617	0.002	0.0092	0.3222	0.7731
	496			3-amino-2-piperidone	LC/MS pos early	62853		HMDB0000323	5200225					0.58	0.77	0.61	0.85	0.75	1.31	1.05	1.46	1.28	0.8	1.12	0.98	1.39	1.22	0.88		0.2873	0.158	0.0018	0.0022	0.1153	0.6099	0.0009	0.0059	0.0669	0.2715	0.0017	0.0084	0.2386	0.2097	0.0645	0.1137	0.0888	0.1121	0.8094	0.8407
	498			2-oxoarginine*	LC/MS pos early	55072	C03771	HMDB0004225	558					1.06	0.86	0.92	0.83	0.9	0.81	0.87	0.78	0.85	1.07	0.97	1.05	0.9	0.98	1.08		0.0735	0.0845	0.3277	0.1266	0.9906	0.7119	0.6446	0.3935	0.156	0.3619	0.4011	0.2655	0.1169	0.1478	0.3472	0.3209	0.0636	0.0891	0.1968	0.7154
	499			citrulline	LC/MS pos early	2132	C00327	HMDB0000904	9750					0.77	0.93	0.84	0.92	0.81	1.21	1.09	1.19	1.06	0.9	0.98	0.87	1.1	0.97	0.89		0.9109	0.328	0.0032	0.0035	0.3507	0.6211	0.0046	0.017	0.3729	0.4921	0.0371	0.0606	0.2413	0.2112	0.0225	0.0587	0.0407	0.0699	0.3951	0.7971
	500			homoarginine	LC/MS pos early	22137	C01924	HMDB0000670	9085					0.46	0.97	0.71	0.73	0.43	2.14	1.56	1.61	0.95	0.73	0.75	0.45	1.03	0.61	0.59		0.2111	0.1334	4.9066e-05	0.0001	0.6827	0.6464	0.0019	0.0099	0.9836	0.6763	0.0404	0.0634	0.2859	0.2311	0.001	0.0073	0.0018	0.0089	0.2283	0.7205
	501			homocitrulline	LC/MS polar	22138	C02427	HMDB0000679	65072					0.65	0.94	0.65	0.6	0.67	1.44	1	0.91	1.03	0.69	0.64	0.71	0.91	1.03	1.12		0.0474	0.0724	0.0073	0.0066	0.0701	0.6099	0.0098	0.027	0.712	0.5992	0.0066	0.0211	0.0028	0.0559	0.0063	0.0261	0.0241	0.0488	0.8782	0.8419
	502			proline	LC/MS pos early	1898	C00148 C000763	HMDB0000162 HMDB0003411	145742;614;8988					0.62	0.76	0.57	0.77	0.64	1.23	0.92	1.25	1.04	0.75	1.02	0.84	1.36	1.13	0.83		0.1269	0.1064	0.0012	0.0016	0.4035	0.6261	0.0036	0.0152	0.0361	0.2104	0.0004	0.0039	0.0838	0.1256	0.0043	0.0197	0.3533	0.2578	0.4472	0.7971
	505			dimethylarginine (SDMA + ADMA)	LC/MS pos early	36808	C21189 C03626	HMDB0003334 HMDB0001539	123831;169148					1.01	0.98	0.98	0.95	1.02	0.96	0.97	0.94	1.01	1.01	0.97	1.05	0.97	1.04	1.08		0.8443	0.3134	0.4016	0.1493	0.7998	0.6689	0.7909	0.4477	0.7775	0.6145	0.908	0.4566	0.4522	0.2865	0.7853	0.4915	0.5844	0.3415	0.7036	0.8407
	506			N-acetylarginine	LC/MS pos early	33953	C02562	HMDB0004620	67427					0.72	0.82	0.82	0.74	0.66	1.13	1.14	1.02	0.92	1.01	0.91	0.81	0.9	0.8	0.9		0.1499	0.1126	0.0947	0.0484	0.2286	0.6099	0.027	0.0499	0.098	0.3086	0.1319	0.1267	0.0399	0.1049	0.0055	0.0241	0.5472	0.3319	0.4495	0.7971
	511			N-acetylcitrulline	LC/MS neg	48434	C15532 C02851	HMDB0000856	656979					0.68	0.78	0.73	0.96	0.84	1.14	1.07	1.41	1.24	0.93	1.23	1.08	1.32	1.16	0.88		0.4374	0.2084	0.3	0.1178	0.3837	0.6241	0.0927	0.1162	0.1268	0.3388	0.1696	0.1492	0.6515	0.3455	0.4816	0.3839	0.8705	0.4314	0.7468	0.8407
	512			N-acetylproline	LC/MS pos early	34387		HMDB0094701	322640					0.56	0.63	0.64	0.76	0.55	1.13	1.15	1.35	0.98	1.02	1.2	0.87	1.18	0.85	0.72		0.3258	0.17	0.0859	0.0452	0.2139	0.6099	0.0388	0.0654	0.0258	0.1933	0.0566	0.0773	0.3301	0.2433	0.0302	0.0699	0.857	0.4277	0.8623	0.8419
	515			N-delta-acetylornithine	LC/MS neg	43249	C00437	HMDB0003357	9920500					0.42	0.64	0.63	0.77	0.68	1.52	1.5	1.84	1.62	0.99	1.21	1.06	1.22	1.08	0.88		0.6749	0.267	0.0006	0.0009	0.0019	0.3104	6.5164e-06	0.0002	0.0087	0.1495	0.006	0.0204	0.0976	0.134	0.0092	0.0346	0.0172	0.0408	0.0242	0.4446
	516			N-alpha-acetylornithine	LC/MS pos early	32984	C00437	HMDB0003357	439232					0.39	0.62	0.57	0.86	0.46	1.58	1.46	2.19	1.18	0.93	1.39	0.75	1.5	0.81	0.54		0.81	0.3027	3.8592e-05	9.7663e-05	0.0116	0.5556	1.7734e-05	0.0003	0.0107	0.1568	0.0033	0.0135	0.227	0.2035	0.0003	0.0036	0.0305	0.0571	0.0797	0.592
	517			N2,N5-diacetylornithine	LC/MS neg	43591		HMDB0240345	65977					0.42	0.85	0.59	0.85	0.53	2.01	1.39	2	1.25	0.69	1	0.62	1.44	0.9	0.62		0.8454	0.3134	0.0014	0.0018	0.2488	0.6099	0.0017	0.0095	0.3206	0.4664	0.0329	0.0559	0.2017	0.192	0.0104	0.0374	0.0229	0.0471	0.2519	0.7483
	520			trans-4-hydroxyproline	LC/MS pos early	32306	C01157	HMDB0000725	5810					0.85	0.94	0.75	0.74	0.75	1.1	0.88	0.87	0.89	0.8	0.79	0.8	0.99	1.01	1.02		0.0478	0.0724	0.1249	0.0603	0.2518	0.6099	0.2503	0.2236	0.6653	0.5878	0.0223	0.0434	0.0134	0.0796	0.0341	0.0755	0.4688	0.3032	0.2304	0.7205
	521			cis-4-hydroxyproline	LC/MS pos early	46732	C03440	HMDB0060460	440014					1.01	0.9	1.01	0.88	1.37	0.9	1	0.87	1.36	1.11	0.97	1.52	0.87	1.37	1.57		0.5591	0.2362	0.2067	0.0882	0.2233	0.6099	0.7684	0.4395	0.5599	0.5492	0.8469	0.4365	0.4863	0.2987	0.1623	0.2049	0.7722	0.3976	0.9191	0.8477
	522			pro-hydroxy-pro	LC/MS pos early	35127		HMDB0006695	11902893					0.9	0.71	0.64	0.76	0.84	0.79	0.71	0.85	0.94	0.9	1.08	1.19	1.19	1.32	1.1		0.0042	0.0379	0.6383	0.2096	0.4931	0.6261	0.538	0.3498	0.022	0.1932	0.0023	0.0104	0.0532	0.1139	0.2003	0.2362	0.085	0.1089	0.0115	0.3345
	525			N-methylproline	LC/MS pos early	37431		HMDB0094696	643474					0.73	0.83	0.75	1	0.79	1.14	1.03	1.38	1.08	0.91	1.21	0.95	1.33	1.05	0.78		0.5063	0.2242	0.1678	0.0747	0.9148	0.6944	0.2551	0.2251	0.3215	0.4667	0.1136	0.1172	0.7856	0.3818	0.3537	0.3256	0.8807	0.4339	0.6447	0.8257
	526			N,N,N-trimethyl-alanylproline betaine (TMAP)	LC/MS pos early	62947		HMDB0240365						1.13	0.89	1.32	1.02	1.18	0.79	1.17	0.91	1.04	1.49	1.15	1.32	0.77	0.89	1.15		0.8865	0.3229	0.0116	0.0097	0.4722	0.6261	0.2922	0.243	0.4283	0.5048	0.0897	0.103	0.7635	0.3752	0.2036	0.2385	0.0696	0.0932	0.5041	0.8015
	528			N-monomethylarginine	LC/MS pos early	43586	C03884	HMDB0029416	132862					1.33	1.02	1.12	1	1.35	0.76	0.84	0.75	1.01	1.1	0.99	1.33	0.9	1.21	1.35		0.5863	0.2444	0.007	0.0064	0.4071	0.6261	0.0403	0.0674	0.8314	0.6366	0.451	0.2872	0.9743	0.4354	0.0264	0.0644	0.0637	0.0891	0.1806	0.7154
	529			argininate*	LC/MS pos early	57461		HMDB0003148	160437					0.95	1.07	0.99	0.56	0.75	1.13	1.05	0.6	0.8	0.93	0.53	0.7	0.57	0.76	1.34		0.0032	0.0334	0.4898	0.1713	0.3324	0.6211	0.8181	0.4536	0.8517	0.6403	0.9962	0.4778	0.004	0.058	0.1581	0.2021	0.677	0.3741	0.8218	0.8407
	532			N-acetylhomocitrulline	LC/MS pos early	62707								0.67	0.82	0.65	0.45	0.75	1.23	0.98	0.67	1.12	0.8	0.55	0.91	0.69	1.15	1.66		0.0767	0.0846	0.8255	0.2538	0.0245	0.6099	0.0866	0.1125	0.3445	0.4841	0.0931	0.1044	0.001	0.0458	0.1637	0.2062	0.4269	0.2871	0.9709	0.8558
	535		Creatine Metabolism	guanidinoacetate	LC/MS pos early	43802	C00581	HMDB0000128	763					0.79	0.98	0.68	1.77	0.88	1.24	0.86	2.24	1.11	0.69	1.81	0.89	2.61	1.29	0.49		0.0152	0.0471	0.0041	0.0043	0.2859	0.6099	0.4061	0.293	0.9059	0.6565	0.1309	0.1267	0.0095	0.0683	0.7651	0.4888	0.4751	0.305	0.4853	0.7971
	536			creatine	LC/MS pos early	27718	C00300	HMDB0000064	586					0.9	0.93	0.84	0.88	0.9	1.03	0.93	0.99	1	0.91	0.96	0.97	1.06	1.08	1.02		0.4725	0.2179	0.2385	0.0979	0.5495	0.6261	0.2768	0.2365	0.433	0.5048	0.0563	0.0771	0.1987	0.1904	0.2781	0.2848	0.7574	0.3933	0.3909	0.7971
	537			creatinine	LC/MS pos early	513	C00791	HMDB0000562	588					0.94	0.9	0.85	0.85	0.97	0.96	0.9	0.9	1.03	0.94	0.95	1.08	1	1.14	1.14		0.0394	0.0685	0.7886	0.2444	0.0275	0.6099	0.3289	0.2615	0.0726	0.2836	0.0072	0.0223	0.0059	0.0618	0.6415	0.4431	0.3957	0.2758	0.0709	0.5596
	538			creatine phosphate	LC/MS polar	33951	C02305	HMDB0001511	587;9548602					1.52	0.94	1.43	0.94	1.45	0.62	0.94	0.62	0.95	1.52	0.99	1.54	0.66	1.01	1.55		0.9447	0.3365	0.1215	0.059	0.8444	0.678	0.2806	0.2375	0.7429	0.6088	0.4436	0.2851	0.8791	0.4092	0.1821	0.2215	0.4493	0.296	0.7502	0.8407
	545		Polyamine Metabolism	putrescine	LC/MS pos early	1408	C00134	HMDB0001414	1045					0.91	0.52	0.73	0.73	1	0.57	0.8	0.8	1.1	1.39	1.39	1.92	1	1.38	1.38		0.2152	0.1347	0.5375	0.1826	0.5886	0.6348	0.6842	0.4111	0.0544	0.2503	0.3547	0.2456	0.3605	0.2549	0.6282	0.4404	0.1233	0.1398	0.601	0.8166
	546			N-acetylputrescine	LC/MS pos early	37496	C02714	HMDB0002064	122356					0.96	0.6	0.72	0.62	0.87	0.62	0.75	0.64	0.9	1.2	1.03	1.45	0.86	1.21	1.41		0.0116	0.0471	0.1422	0.0664	0.2988	0.6099	0.9497	0.4939	0.0243	0.1933	0.058	0.0781	0.0139	0.0796	0.6597	0.4511	0.021	0.0456	0.0506	0.5238
	552			N-acetyl-isoputreanine	LC/MS pos early	62309			131802901					0.63	0.62	0.58	0.85	0.59	0.99	0.92	1.35	0.94	0.93	1.36	0.94	1.46	1.01	0.69		0.4854	0.2202	0.2995	0.1178	0.6428	0.6447	0.2843	0.2393	0.1591	0.3647	0.2083	0.17	0.7861	0.3818	0.2512	0.266	0.7278	0.386	0.847	0.8419
	553			spermidine	LC/MS pos early	485	C00315	HMDB0001257	1102					0.73	0.63	1.44	2.79	0.9	0.87	1.98	3.84	1.24	2.28	4.42	1.43	1.94	0.63	0.32		0.4502	0.2115	0.4513	0.1628	0.041	0.6099	0.3187	0.257	0.1885	0.3681	0.7593	0.4084	0.2194	0.2	0.4842	0.3843	0.744	0.3895	0.1952	0.7154
	558			(N(1) + N(8))-acetylspermidine	LC/MS pos early	57814	C00612 C01029	HMDB0001276 HMDB0002189	123689;496					0.75	0.62	0.57	0.64	0.69	0.82	0.75	0.85	0.92	0.91	1.03	1.12	1.13	1.23	1.09		0.0653	0.0816	0.3991	0.1486	0.4135	0.6261	0.4203	0.2972	0.1419	0.3487	0.0094	0.0261	0.1134	0.1466	0.3032	0.3003	0.4967	0.3145	0.0618	0.5421
	564			5-methylthioadenosine (MTA)	LC/MS pos early	1419	C00170	HMDB0001173	439176					1.01	0.81	0.77	1	0.93	0.8	0.76	0.99	0.92	0.95	1.23	1.15	1.3	1.21	0.93		0.1135	0.1008	0.5674	0.1908	0.9244	0.6992	0.9853	0.5025	0.2513	0.4111	0.0933	0.1044	0.9359	0.4277	0.6175	0.4372	0.2589	0.2166	0.0967	0.6317
	568			4-acetamidobutanoate	LC/MS pos early	1558	C02946	HMDB0003681	18189					0.79	0.81	0.84	0.61	0.93	1.02	1.06	0.77	1.18	1.04	0.75	1.16	0.73	1.11	1.53		0.0969	0.0913	0.21	0.0889	0.0007	0.2646	0.06	0.0892	0.0897	0.3086	0.125	0.1238	6.1568e-05	0.0086	0.5819	0.4253	0.8439	0.4222	0.7126	0.8407
	570		Guanidino and Acetamido Metabolism	1-methylguanidine	LC/MS pos early	48114	C02294	HMDB0001522	10111					1.12	0.89	1.15	0.63	0.99	0.8	1.03	0.56	0.89	1.29	0.71	1.12	0.55	0.87	1.58		0.145	0.1106	0.0339	0.0223	0.7643	0.6585	0.4056	0.293	0.7447	0.6088	0.4294	0.2788	0.0766	0.1201	0.978	0.5435	0.2498	0.2134	0.9664	0.8558
	571			4-guanidinobutanoate	LC/MS pos early	15681	C01035	HMDB0003464	500					0.66	0.93	0.92	0.61	0.66	1.42	1.41	0.93	1.01	0.99	0.65	0.71	0.66	0.72	1.09		0.0052	0.0379	0.2935	0.1161	0.0801	0.6099	0.0177	0.0385	0.5868	0.5531	0.6085	0.3534	0.0026	0.0559	0.0124	0.0413	0.0604	0.0873	0.0566	0.5421
	572			guanidinosuccinate	LC/MS polar	32446	C03139	HMDB0003157	439918					1.36	1.92	1.51	1.01	0.89	1.41	1.11	0.74	0.65	0.79	0.52	0.46	0.67	0.59	0.88		0.1208	0.1045	0.9555	0.2807	0.6521	0.6447	0.6325	0.3882	0.1128	0.3301	0.3999	0.2655	0.7475	0.3707	0.897	0.5214	0.2605	0.2174	0.7139	0.8407
	575		Glutathione Metabolism	glutathione, oxidized (GSSG)	LC/MS pos early	27727	D00031 C00127	HMDB0003337	65359					0.97	0.73	10.45	10.36	0.96	0.75	10.76	10.66	0.99	14.29	14.16	1.31	0.99	0.09	0.09		0.8682	0.3192	0.5854	0.1951	0.16	0.6099	0.947	0.4939	0.4491	0.5083	0.3007	0.2205	0.393	0.2654	0.9492	0.538	0.4108	0.2826	0.3322	0.7818
	581			cysteine-glutathione disulfide	LC/MS pos early	35159	R00900	HMDB0000656	3080690					0.88	0.97	1.42	1.12	0.76	1.1	1.6	1.27	0.86	1.46	1.15	0.78	0.79	0.54	0.68		0.5041	0.2241	0.8934	0.2669	0.6885	0.6482	0.596	0.3722	0.8798	0.6518	0.6427	0.3645	0.6075	0.332	0.408	0.3499	0.7042	0.3778	0.3227	0.7731
	582			S-methylglutathione	LC/MS neg	33944	C11347		115260					0.4	0.49	0.4	1.14	0.52	1.23	1	2.83	1.3	0.81	2.3	1.06	2.84	1.3	0.46		0.0192	0.0516	0.0004	0.0007	0.1542	0.6099	0.0039	0.0159	0.0142	0.1693	0.0029	0.0127	0.4939	0.2989	0.0265	0.0644	0.6155	0.3527	0.9151	0.8455
	585			cysteinylglycine disulfide*	LC/MS pos early	62103		HMDB0000709	22833544					0.55	0.72	0.89	0.75	0.75	1.31	1.6	1.35	1.36	1.22	1.03	1.03	0.84	0.85	1		0.5803	0.2426	0.5734	0.1923	0.3577	0.6211	0.1419	0.1542	0.6698	0.5878	0.9892	0.4766	0.3292	0.2433	0.3804	0.343	0.2909	0.2324	0.1454	0.6706
	587			5-oxoproline	LC/MS neg	1494	C01879 C02237	HMDB0000267	439685;7405					0.77	0.73	0.84	0.88	0.9	0.96	1.09	1.15	1.18	1.14	1.21	1.23	1.06	1.08	1.02		0.3069	0.165	0.5217	0.1791	0.142	0.6099	0.0567	0.0866	0.023	0.1932	0.1276	0.1249	0.2986	0.2371	0.3141	0.3043	0.6877	0.3752	0.6847	0.8388
	588			2-aminobutyrate	LC/MS pos early	42374	C02356	HMDB0000452	80283					0.78	0.86	0.73	1.2	0.83	1.11	0.94	1.55	1.07	0.85	1.4	0.97	1.65	1.14	0.69		0.1209	0.1045	0.0127	0.0103	0.4125	0.6261	0.1479	0.1585	0.1858	0.3672	0.0615	0.0812	0.2832	0.2298	0.1712	0.2128	0.8975	0.4374	0.6543	0.8257
	590			2-hydroxybutyrate/2-hydroxyisobutyrate	LC/MS polar	52281	C21297 C05984	HMDB0000729 HMDB00008	4277439;440864					1.19	0.74	0.96	1.09	1.02	0.62	0.81	0.92	0.86	1.3	1.48	1.37	1.14	1.06	0.93		0.0482	0.0724	0.1359	0.0643	0.3762	0.6231	0.173	0.174	0.0929	0.3086	0.8426	0.4359	0.521	0.309	0.7106	0.468	0.0036	0.0147	0.1205	0.6579
	592			ophthalmate	LC/MS pos early	34592		HMDB0005765	7018721					0.83	0.3	1.4	1.85	0.99	0.36	1.69	2.23	1.19	4.63	6.1	3.26	1.32	0.7	0.53		0.0647	0.0815	0.4824	0.1698	0.2861	0.6099	0.8852	0.4759	0.0515	0.2439	0.7231	0.3952	0.4609	0.2891	0.8642	0.5118	0.0375	0.0657	0.6184	0.8166
	648	Peptide	Gamma-glutamyl Amino Acid	gamma-glutamylalanine	LC/MS pos early	37063	C03738	HMDB0029142	440103					0.66	0.77	0.51	0.99	0.54	1.16	0.77	1.49	0.81	0.67	1.28	0.7	1.92	1.05	0.55		0.0807	0.0851	0.0017	0.0021	0.8646	0.6818	0.0797	0.1053	0.0973	0.3086	0.0017	0.0084	0.6251	0.3371	0.0065	0.0268	0.9203	0.4406	0.122	0.6579
	650			gamma-glutamylglutamate	LC/MS pos early	36738	C05282	HMDB0011737	92865					0.9	0.58	0.77	1.11	0.93	0.65	0.86	1.24	1.04	1.33	1.92	1.6	1.44	1.2	0.83		0.0048	0.0379	0.8545	0.2604	0.4469	0.6261	0.7905	0.4477	0.0114	0.1604	0.1363	0.1288	0.6218	0.3371	0.9554	0.5394	0.0218	0.0461	0.2172	0.7205
	651			gamma-glutamylglutamine	LC/MS pos early	2730	C05283	HMDB0011738	150914					0.9	0.96	0.65	0.95	0.75	1.07	0.73	1.06	0.83	0.68	0.99	0.78	1.46	1.15	0.79		0.1137	0.1008	0.0035	0.0038	0.2416	0.6099	0.4837	0.3245	0.7824	0.6149	0.0017	0.0084	0.554	0.317	0.0351	0.0769	0.6702	0.3714	0.011	0.3345
	652			gamma-glutamylglycine	LC/MS pos early	33949		HMDB0011667	100099					0.97	0.8	0.68	0.97	0.91	0.82	0.7	1	0.93	0.85	1.21	1.14	1.43	1.34	0.94		0.013	0.0471	0.3009	0.1178	0.6687	0.6447	0.8904	0.477	0.1486	0.3528	0.008	0.0235	0.7993	0.3851	0.5506	0.4131	0.1895	0.1808	0.0113	0.3345
	653			gamma-glutamylhistidine	LC/MS pos early	18245		HMDB0029151	7017195					0.83	0.7	0.63	0.82	0.78	0.85	0.76	0.99	0.94	0.9	1.17	1.11	1.3	1.24	0.95		0.0027	0.0334	0.1389	0.0652	0.6581	0.6447	0.147	0.1583	0.0061	0.1293	0.0004	0.004	0.0711	0.1162	0.0479	0.0947	0.1614	0.1627	0.0227	0.4371
	654			gamma-glutamylisoleucine*	LC/MS pos early	34456		HMDB0011170	22885096					0.84	0.78	0.75	0.79	0.76	0.93	0.89	0.94	0.9	0.96	1.01	0.97	1.06	1.02	0.96		0.048	0.0724	0.2071	0.0882	0.5791	0.6334	0.1181	0.1374	0.0286	0.1964	0.0128	0.0309	0.0386	0.1046	0.0202	0.0552	0.5016	0.3152	0.3147	0.7701
	655			gamma-glutamylleucine	LC/MS pos early	18369		HMDB0011171	151023					0.75	0.74	0.62	0.79	0.6	0.98	0.84	1.05	0.81	0.85	1.07	0.82	1.26	0.97	0.77		0.0169	0.0504	0.0025	0.0028	0.7975	0.6689	0.026	0.0491	0.0216	0.1932	0.0006	0.0046	0.0572	0.1139	0.0004	0.0041	0.9366	0.4442	0.1548	0.6781
	656			gamma-glutamyl-alpha-lysine	LC/MS pos early	55015			65254					0.64	0.64	0.56	0.56	0.52	1	0.87	0.87	0.8	0.87	0.87	0.8	1	0.92	0.92		0.0098	0.0443	0.0251	0.0175	0.3039	0.6099	0.0164	0.037	0.0208	0.1932	0.0008	0.0058	0.0025	0.0559	0.001	0.0073	0.9212	0.4406	0.268	0.7483
	657			gamma-glutamyl-epsilon-lysine	LC/MS pos early	33934		HMDB0003869	7015685					1.32	0.88	1.17	0.85	0.95	0.67	0.89	0.64	0.72	1.33	0.96	1.08	0.72	0.81	1.12		0.4214	0.204	0.126	0.0606	0.9866	0.7119	0.3068	0.2496	0.5871	0.5531	0.7589	0.4084	0.4237	0.2767	0.9921	0.5486	0.1218	0.1388	0.4717	0.7971
	658			gamma-glutamylmethionine	LC/MS pos early	44872		HMDB0029155	7009567					0.55	0.8	0.34	0.69	0.33	1.45	0.62	1.24	0.59	0.43	0.86	0.41	2.01	0.95	0.47		0.0371	0.0671	0.0002	0.0004	0.6653	0.6447	0.0703	0.0981	0.356	0.4915	0.0003	0.003	0.1158	0.1478	0.0007	0.0054	0.3585	0.2607	0.0384	0.4776
	659			gamma-glutamylphenylalanine	LC/MS pos early	33422		HMDB0000594	111299					0.69	0.6	0.53	0.84	0.61	0.87	0.77	1.23	0.89	0.88	1.4	1.02	1.6	1.16	0.73		0.0092	0.0443	0.0177	0.0133	0.6376	0.6447	0.058	0.0874	0.0056	0.1293	0.0009	0.006	0.2694	0.2222	0.0082	0.0319	0.3288	0.2485	0.105	0.6317
	660			gamma-glutamylthreonine	LC/MS pos early	33364		HMDB0029159	76078708					0.74	0.8	0.65	0.79	0.58	1.09	0.88	1.07	0.78	0.81	0.99	0.72	1.22	0.89	0.73		0.0276	0.0592	0.0002	0.0003	0.8791	0.684	0.0095	0.0267	0.0733	0.2843	0.0004	0.0039	0.0526	0.1139	6.4947e-05	0.001	0.376	0.2669	0.2617	0.7483
	661			gamma-glutamyltryptophan	LC/MS pos early	33947		HMDB0029160	3989307					0.59	0.59	0.5	0.81	0.58	0.99	0.85	1.37	0.98	0.85	1.38	0.99	1.62	1.16	0.72		0.0238	0.0568	0.0123	0.0101	0.4497	0.6261	0.0197	0.0409	0.0066	0.1293	0.0012	0.0071	0.3044	0.238	0.0158	0.0476	0.6614	0.3689	0.2891	0.7483
	662			gamma-glutamyltyrosine	LC/MS neg	2734		HMDB0011741	94340					0.51	0.5	0.42	0.81	0.52	0.97	0.82	1.58	1.01	0.85	1.63	1.04	1.92	1.23	0.64		0.0302	0.0614	0.0408	0.0259	0.469	0.6261	0.0918	0.1157	0.0117	0.1605	0.0069	0.0217	0.6246	0.3371	0.0324	0.0727	0.3618	0.2617	0.2647	0.7483
	663			gamma-glutamylvaline	LC/MS pos early	43829		HMDB0011172	7015683					0.84	0.71	0.71	0.81	0.75	0.84	0.84	0.96	0.89	0.99	1.14	1.06	1.15	1.06	0.92		0.0033	0.0334	0.184	0.0808	0.5116	0.6261	0.1044	0.1267	0.0018	0.068	0.0016	0.0084	0.0371	0.1045	0.0078	0.0311	0.0954	0.1169	0.0902	0.6189
	664			gamma-glutamylserine	LC/MS pos early	54914		HMDB0029158	22844748					0.82	0.78	0.61	0.99	0.75	0.95	0.74	1.21	0.91	0.78	1.27	0.96	1.64	1.24	0.76		0.0172	0.051	0.0131	0.0105	0.9428	0.7014	0.2112	0.2001	0.0625	0.2623	0.0016	0.0083	0.8366	0.3995	0.0571	0.1054	0.5202	0.3245	0.0391	0.4776
	665			gamma-glutamylcitrulline*	LC/MS pos early	62104								0.85	1.13	0.65	1.13	0.62	1.33	0.76	1.32	0.73	0.57	0.99	0.55	1.74	0.96	0.55		0.5432	0.2322	0.0081	0.0073	0.3833	0.6241	0.5775	0.3651	0.7674	0.6133	0.0318	0.0548	0.9368	0.4277	0.0744	0.1235	0.3954	0.2758	0.1032	0.6317
	666			gamma-glutamyl-2-aminobutyrate	LC/MS pos early	37092								0.81	0.77	0.66	1.3	0.72	0.95	0.81	1.59	0.88	0.85	1.68	0.93	1.98	1.09	0.55		0.0426	0.07	0.0241	0.0171	0.3503	0.6211	0.3962	0.2891	0.1193	0.3345	0.0299	0.0526	0.3016	0.2374	0.1408	0.1847	0.4658	0.3019	0.1695	0.6904
	668		Dipeptide Derivative	isoleucylhydroxyproline*	LC/MS pos early	63051		HMDB0028908	61158802					0.83	0.51	0.56	0.67	0.77	0.62	0.68	0.81	0.93	1.09	1.31	1.5	1.19	1.37	1.15		0.0003	0.0106	0.9731	0.2843	0.5417	0.6261	0.3925	0.2888	0.0007	0.068	0.001	0.0062	0.0484	0.1139	0.1872	0.2246	0.0074	0.0248	0.0097	0.3345
	669			leucylhydroxyproline*	LC/MS pos early	63052		HMDB0028930	20847829					0.71	0.46	0.49	0.75	0.61	0.64	0.69	1.05	0.85	1.07	1.63	1.32	1.52	1.23	0.81		0.0005	0.013	0.1669	0.0747	0.6027	0.638	0.1918	0.1888	0.0007	0.068	0.0007	0.0055	0.2533	0.2147	0.0288	0.0685	0.0227	0.0471	0.0229	0.4371
	835		Dipeptide	glycylleucine	LC/MS pos early	34398	C02155	HMDB0000759	92843					0.75	0.36	0.59	0.8	0.72	0.48	0.79	1.08	0.97	1.66	2.26	2.03	1.36	1.22	0.9		0.0176	0.051	0.8903	0.2665	0.1567	0.6099	0.1958	0.1903	0.0015	0.068	0.0536	0.0746	0.3122	0.2401	0.1753	0.2162	0.0417	0.0706	0.5024	0.8015
	845			glycylvaline	LC/MS pos early	18357		HMDB0028854	2724807					0.64	0.43	1.13	1.63	1.75	0.68	1.78	2.57	2.74	2.63	3.79	4.05	1.44	1.54	1.07		0.0692	0.0825	0.4737	0.1677	0.1248	0.6099	0.2619	0.2293	0.0269	0.1933	0.6274	0.361	0.9918	0.4393	0.5616	0.4171	0.2504	0.2134	0.5198	0.8015
	949			phenylalanylhydroxyproline*	LC/MS pos early	63039		HMDB0011176	53480675					0.68	0.48	0.47	0.62	0.63	0.71	0.69	0.92	0.93	0.97	1.29	1.31	1.32	1.35	1.02		0.0021	0.0299	0.1938	0.0839	0.6995	0.6485	0.1548	0.1615	0.0029	0.1004	0.0008	0.0056	0.0532	0.1139	0.0245	0.0611	0.0906	0.1137	0.0321	0.4708
	963			prolylglycine	LC/MS pos early	40703		HMDB0011178	6426709					0.75	0.71	0.82	0.9	0.81	0.94	1.09	1.19	1.07	1.16	1.26	1.14	1.09	0.98	0.9		0.4773	0.2193	0.2103	0.0889	0.7553	0.6571	0.26	0.2284	0.1788	0.3647	0.1408	0.1309	0.553	0.3169	0.1351	0.1782	0.8221	0.4147	0.7198	0.8407
	1053			valylleucine	LC/MS pos early	39994		HMDB0029131	352039					0.66	0.55	0.7	0.61	0.63	0.84	1.06	0.92	0.95	1.26	1.1	1.14	0.87	0.9	1.03		0.1616	0.1162	0.6255	0.2064	0.3615	0.6211	0.2151	0.2022	0.0376	0.2128	0.1761	0.1522	0.0981	0.134	0.0459	0.0921	0.3756	0.2669	0.9067	0.8424
	1153		Polypeptide	glu-gly-asn-val**	LC/MS pos early	62917								0.6	0.46	0.79	0.68	1.51	0.76	1.31	1.13	2.5	1.74	1.49	3.31	0.86	1.91	2.22		0.19	0.1246	0.2197	0.0916	0.0567	0.6099	0.1983	0.1923	0.0259	0.1933	0.483	0.2971	0.2577	0.2173	0.4829	0.3843	0.3177	0.2453	0.551	0.8156
	1204		Acetylated Peptides	phenylacetylglutamine	LC/MS neg	35126	C04148	HMDB0006344	92258					0.48	0.72	0.55	0.38	0.34	1.51	1.16	0.79	0.72	0.77	0.52	0.48	0.68	0.62	0.92		0.039	0.0685	0.0742	0.0405	0.5209	0.6261	0.0862	0.1123	0.4013	0.4924	0.0426	0.0655	0.012	0.078	0.0079	0.0311	0.3664	0.2636	0.7371	0.8407
	1207			phenylacetylglycine	LC/MS pos early	33945	C05598	HMDB0000821	68144					0.62	0.87	0.74	0.5	0.65	1.4	1.2	0.81	1.05	0.85	0.57	0.75	0.67	0.87	1.3		0.1	0.0925	0.4515	0.1628	0.1143	0.6099	0.0674	0.0953	0.4158	0.4971	0.1708	0.15	0.0056	0.0618	0.0794	0.1287	0.2951	0.2335	0.6283	0.8241
	1214			phenylacetyltaurine	LC/MS neg	63154			2179693					0.62	0.84	0.75	0.52	0.66	1.35	1.2	0.83	1.05	0.89	0.62	0.78	0.69	0.88	1.27		0.1771	0.1211	0.7051	0.2273	0.1231	0.6099	0.0763	0.1029	0.1941	0.3712	0.2088	0.17	0.0085	0.0668	0.1047	0.1563	0.6189	0.3527	0.5891	0.8156
	1236		Modified Peptides	N,N-dimethyl-pro-pro	LC/MS pos early	64571								1.11	0.78	1.22	1.28	1.11	0.7	1.09	1.15	1	1.56	1.64	1.43	1.05	0.91	0.87		0.5297	0.2291	0.2304	0.0948	0.2871	0.6099	0.7112	0.421	0.1892	0.3683	0.5316	0.3185	0.5871	0.3262	0.7523	0.4852	0.0956	0.1169	0.7975	0.8407
	1237	Carbohydrate	Glycolysis, Gluconeogenesis, and Pyruvate Metabolism	1,5-anhydroglucitol (1,5-AG)	LC/MS neg	20675	C07326	HMDB0002712	64960					1.17	1.2	1.33	0.69	0.92	1.02	1.13	0.59	0.78	1.11	0.58	0.77	0.52	0.69	1.34		0.0275	0.0592	0.0536	0.0314	0.872	0.684	0.3946	0.2888	0.7779	0.6145	0.1986	0.1648	0.0698	0.1162	0.7669	0.4888	0.5673	0.3379	0.6568	0.8257
	1240			glucose	LC/MS polar	48152	C00031	HMDB0000122	5793					1.21	1.31	1.22	0.86	1.14	1.09	1.01	0.71	0.94	0.93	0.66	0.87	0.71	0.93	1.31		0.0265	0.059	0.0363	0.0235	0.0977	0.6099	0.0957	0.119	0.0336	0.2085	0.0955	0.1064	0.1959	0.1889	0.2245	0.2518	0.6211	0.3533	0.999	0.8658
	1241			glucose 6-phosphate	LC/MS polar	31260	C00092	HMDB0001401	5958					0.7	0.54	1.11	0.95	1.04	0.78	1.59	1.37	1.49	2.06	1.76	1.93	0.86	0.94	1.09		0.7144	0.2771	0.2116	0.0891	0.0912	0.6099	0.4059	0.293	0.0387	0.2168	0.8332	0.4331	0.3945	0.2659	0.8608	0.5108	0.2001	0.1853	0.2992	0.7597
	1248			2,3-diphosphoglycerate	LC/MS neg	15664	C01159	HMDB0001294	186004					1	1	1	1.14	1	1	1	1.14	1	1	1.14	1	1.14	1	0.88		0.3779	0.1891	0.324	0.1254	0.3779	0.6231	1	0.5046	1	0.6772	1	0.4781	0.0918	0.1311	1	0.5487	1	0.4629	1	0.8658
	1249			dihydroxyacetone phosphate (DHAP)	LC/MS pos early	15522	C00111	HMDB0001473	668					0.89	0.5	3.15	2.06	0.77	0.57	3.56	2.32	0.87	6.27	4.08	1.54	0.65	0.25	0.38		0.995	0.3469	0.1656	0.0743	0.1939	0.6099	0.7001	0.4163	0.3843	0.4921	0.1679	0.1485	0.7441	0.3695	0.918	0.5299	0.2126	0.1924	0.3149	0.7701
	1254			3-phosphoglycerate	LC/MS pos early	1414	C00597	HMDB0000807	724					1.2	0.77	7.93	12.11	1.99	0.64	6.61	10.09	1.66	10.33	15.77	2.59	1.53	0.25	0.16		0.4336	0.208	0.1014	0.0511	0.0848	0.6099	0.4503	0.3103	0.7733	0.6145	0.0217	0.0429	0.1327	0.1559	0.3257	0.3101	0.2992	0.2362	0.1103	0.6317
	1255			phosphoenolpyruvate (PEP)	LC/MS neg	597	C00074	HMDB0000263	1005					0.76	0.61	3.89	5.03	1.31	0.8	5.1	6.61	1.72	6.35	8.22	2.14	1.29	0.34	0.26		0.3003	0.1626	0.3403	0.1309	0.0743	0.6099	0.9467	0.4939	0.6813	0.5904	0.0489	0.0702	0.1777	0.182	0.5115	0.3974	0.7308	0.386	0.0422	0.4827
	1256			pyruvate	LC/MS polar	48990	C00022	HMDB0000243	1060					1.2	0.82	0.7	1.11	1.04	0.68	0.59	0.93	0.87	0.86	1.36	1.27	1.58	1.48	0.93		0.0127	0.0471	0.9856	0.287	0.6922	0.6482	0.5891	0.3699	0.0756	0.2879	0.0898	0.103	0.7639	0.3752	0.7209	0.4717	0.023	0.0471	0.0281	0.4708
	1257			lactate	LC/MS polar	527	C00186	HMDB0000190	612					0.82	0.61	0.6	0.77	0.77	0.74	0.74	0.94	0.94	1	1.27	1.28	1.27	1.28	1.01		0.0074	0.0423	0.6721	0.2188	0.6419	0.6447	0.3635	0.2765	0.0048	0.1293	0.014	0.0326	0.2713	0.2224	0.1838	0.223	0.0445	0.0726	0.1051	0.6317
	1260			glycerate	LC/MS polar	1572	C00258	HMDB0006372 HMDB0000139	752;439194					0.49	1.6	1.13	0.36	1.12	3.24	2.3	0.73	2.28	0.71	0.23	0.7	0.32	0.99	3.13		0.3774	0.1891	0.9581	0.2808	0.3954	0.6261	0.5934	0.3721	0.5304	0.5409	0.989	0.4766	0.2253	0.2025	0.89	0.5205	0.2488	0.2134	0.6029	0.8166
	1272		Pentose Phosphate Pathway	ribose 1-phosphate	LC/MS polar	1763	C00620	HMDB0001489	439236					4.41	1.66	2.71	0.64	1.33	0.38	0.62	0.15	0.3	1.64	0.39	0.8	0.24	0.49	2.08		0.0695	0.0825	0.0138	0.011	0.2987	0.6099	0.0151	0.0349	0.9876	0.6763	0.1126	0.1168	0.6007	0.3299	0.8398	0.504	0.0157	0.0394	0.3609	0.7908
	1274			sedoheptulose-7-phosphate	LC/MS neg	35649	C05382	HMDB0001068	616					0.48	0.28	1.14	0.79	0.55	0.57	2.38	1.64	1.14	4.15	2.86	1.99	0.69	0.48	0.69		0.8455	0.3134	0.1506	0.0692	0.0036	0.3819	0.2277	0.2102	0.0067	0.1293	0.401	0.2655	0.3656	0.257	0.3889	0.3435	0.1077	0.1279	0.045	0.5054
	1278		Pentose Metabolism	ribose	LC/MS polar	1471	C00121	HMDB0000283	5779					0.66	0.91	0.91	0.76	0.41	1.37	1.37	1.14	0.62	1	0.83	0.45	0.83	0.45	0.54		0.1538	0.1143	0.2092	0.0889	0.9722	0.7081	0.3578	0.2765	0.7651	0.6129	0.3604	0.2492	0.1642	0.1731	0.0449	0.0912	0.5325	0.3278	0.996	0.8658
	1279			ribitol	LC/MS polar	15772	C00532 C01904 C00474 C00379	HMDB0002917 HMDB0000508 HMDB0001851 HMDB0000568	6912					0.98	0.87	0.87	0.92	1.21	0.89	0.89	0.95	1.24	1	1.07	1.4	1.06	1.39	1.31		0.0148	0.0471	0.1155	0.0566	0.0764	0.6099	0.7922	0.4479	0.0826	0.3002	0.1284	0.1254	0.3332	0.2442	0.0727	0.1215	0.1372	0.1472	0.2049	0.7154
	1280			ribonate	LC/MS polar	27731	C01685	HMDB0000867	5460677					1.19	1.1	0.64	0.56	0.8	0.92	0.54	0.47	0.67	0.59	0.51	0.73	0.86	1.24	1.44		0.0487	0.0729	0.9274	0.2752	0.0904	0.6099	0.6777	0.4077	0.9421	0.665	0.1121	0.1168	0.0259	0.0992	0.3841	0.343	0.7314	0.386	0.0479	0.5054
	1281			ribulose/xylulose	LC/MS polar	54671		HMDB0000621 HMDB0000751 HMDB0001644 HMDB0003371	151261;5289590					0.56	0.55	0.75	0.62	0.68	0.99	1.34	1.12	1.22	1.35	1.13	1.23	0.84	0.91	1.09		0.711	0.2765	0.6279	0.207	0.0219	0.6099	0.0177	0.0385	0.0149	0.1693	0.3465	0.2418	0.0858	0.1276	0.0924	0.1461	0.9448	0.4461	0.1341	0.6639
	1284			xylose	LC/MS polar	15581	C00181	HMDB0000098	135191					1.03	1	0.84	0.55	1.01	0.97	0.81	0.53	0.98	0.84	0.55	1.02	0.65	1.2	1.85		0.1393	0.1094	0.0748	0.0407	0.1465	0.6099	0.8781	0.4726	0.3481	0.4859	0.5342	0.3192	0.0103	0.0712	0.9955	0.5486	0.2764	0.2255	0.4392	0.7971
	1286			arabinose	LC/MS polar	575	C00216	HMDB0029942	66308					1.32	1.07	0.98	0.54	0.95	0.81	0.74	0.41	0.72	0.92	0.51	0.89	0.55	0.96	1.74		0.077	0.0846	0.1325	0.0632	0.3847	0.6241	0.235	0.2143	0.8566	0.6421	0.9683	0.4738	0.0704	0.1162	0.855	0.5094	0.3119	0.2418	0.2202	0.7205
	1294			arabitol/xylitol	LC/MS polar	48885	C00542 C01904 C00379	HMDB0002917 HMDB0001851 HMDB0000568	6912;94154					0.81	0.8	0.71	1	0.9	0.99	0.88	1.22	1.11	0.89	1.24	1.13	1.4	1.27	0.91		0.0733	0.0845	0.0766	0.0411	0.9719	0.7081	0.2204	0.2055	0.1682	0.3647	0.0241	0.046	0.8507	0.4016	0.4454	0.3659	0.8746	0.4319	0.2752	0.7483
	1300			arabonate/xylonate	LC/MS polar	48255	C00502 C05411	HMDB0000539	122045;6602431					1	0.84	0.73	0.54	0.66	0.84	0.73	0.54	0.66	0.87	0.64	0.78	0.74	0.9	1.22		0.0146	0.0471	0.9261	0.2751	0.5072	0.6261	0.6878	0.4122	0.3771	0.4921	0.1881	0.1587	0.0066	0.0618	0.0697	0.1197	0.6276	0.3541	0.3552	0.7908
	1305			sedoheptulose	LC/MS polar	53237	C02076	HMDB0003219	5459879					0.74	0.55	0.67	0.69	0.95	0.74	0.91	0.94	1.28	1.23	1.27	1.73	1.03	1.41	1.36		0.0857	0.0877	0.37	0.1395	0.0948	0.6099	0.2174	0.2035	0.0097	0.1528	0.099	0.1091	0.0517	0.1139	0.8258	0.5005	0.1488	0.1542	0.6641	0.8283
	1307			lyxonate	LC/MS polar	61858		HMDB0060255						1.17	1.06	1.2	0.8	1.35	0.91	1.03	0.68	1.15	1.13	0.75	1.27	0.66	1.12	1.69		0.8633	0.3177	0.0278	0.0189	0.3493	0.6211	0.2922	0.243	0.6678	0.5878	0.392	0.2639	0.3437	0.2466	0.1402	0.1844	0.5287	0.3269	0.8407	0.8419
	1317		Glycogen Metabolism	maltose	LC/MS polar	15586	C00208	HMDB0000163	10991489					1.47	1.93	1.31	0.8	1.19	1.32	0.9	0.54	0.81	0.68	0.41	0.62	0.61	0.91	1.49		0.6067	0.2512	0.6532	0.2135	0.1346	0.6099	0.1877	0.1862	0.0546	0.2503	0.5576	0.3309	0.7994	0.3851	0.2818	0.2875	0.5238	0.3248	0.4576	0.7971
	1343		Disaccharides and Oligosaccharides	sucrose	LC/MS polar	1519	C00089	HMDB0000258	5988					0.17	0.35	0.26	0.37	0.16	2.06	1.54	2.2	0.96	0.75	1.07	0.47	1.43	0.62	0.44		0.086	0.0877	0.0062	0.0058	0.0775	0.6099	0.0011	0.0071	0.0154	0.1693	0.0061	0.0206	0.0078	0.064	0.0004	0.0036	0.325	0.2477	0.532	0.8023
	1364		Fructose, Mannose and Galactose Metabolism	fructose	LC/MS polar	577	C00095	HMDB0000660	2723872					1.69	1.19	0.84	0.36	0.78	0.7	0.49	0.21	0.46	0.7	0.3	0.66	0.43	0.94	2.16		0.0135	0.0471	0.2684	0.108	0.1565	0.6099	0.3534	0.2762	0.5854	0.5531	0.7501	0.4059	0.0158	0.0869	0.5173	0.4003	0.699	0.3778	0.2154	0.7205
	1369			mannitol/sorbitol	LC/MS polar	46142	C00392 C00794	HMDB0000247 HMDB0000765	6251;5780					1.2	0.96	1.03	0.63	1.24	0.8	0.86	0.52	1.03	1.07	0.65	1.29	0.61	1.2	1.97		0.2136	0.1346	0.0139	0.011	0.2112	0.6099	0.3043	0.2481	0.8065	0.6251	0.7968	0.4214	0.0337	0.1026	0.4732	0.3809	0.2056	0.1881	0.4388	0.7971
	1370			mannose	LC/MS polar	584	C00159 C02209 C00936	HMDB0000169	185698;82308;18950;439680					2.08	1.55	1.63	1.04	1.76	0.75	0.78	0.5	0.85	1.05	0.67	1.14	0.64	1.08	1.69		0.4775	0.2193	1.3599e-05	4.4437e-05	0.026	0.6099	5.9649e-05	0.0009	0.0239	0.1933	0.0046	0.0174	0.9482	0.4294	0.001	0.0073	0.0353	0.0645	0.1356	0.6643
	1386			2-ketogulonate	LC/MS polar	15306	C15673	HMDB0011732	102424					1.04	0.74	0.97	0.56	1.1	0.71	0.94	0.54	1.06	1.31	0.75	1.48	0.57	1.13	1.98		0.0855	0.0877	0.0043	0.0044	0.1401	0.6099	0.6932	0.4138	0.108	0.3219	0.9689	0.4738	0.0045	0.0597	0.8163	0.4989	0.0481	0.0763	0.6648	0.8283
	1390			galactonate	LC/MS polar	27719	C15930 C00880	HMDB0000565	12310779;128869					1.19	0.8	0.9	0.71	1.11	0.68	0.76	0.6	0.94	1.13	0.89	1.39	0.79	1.23	1.56		0.0177	0.051	0.002	0.0024	0.2539	0.6099	0.189	0.1868	0.0705	0.2771	0.4689	0.2936	0.0115	0.076	0.5307	0.4063	0.0028	0.0128	0.0456	0.5054
	1424		Aminosugar Metabolism	glucuronate	LC/MS polar	15443	C16245	HMDB0000127	441478;94715;23677976;65041;444791					0.34	0.57	0.55	0.61	0.44	1.69	1.63	1.82	1.3	0.96	1.07	0.77	1.12	0.8	0.71		0.6391	0.2593	0.0113	0.0096	0.1959	0.6099	0.0043	0.0168	0.1657	0.3647	0.0267	0.049	0.0719	0.1162	0.0157	0.0476	0.112	0.1315	0.4682	0.7971
	1429			N-acetylglucosamine 6-phosphate	LC/MS polar	15107	C00357	HMDB0002817	439219					1.07	0.64	0.78	0.85	1.09	0.6	0.72	0.79	1.01	1.21	1.32	1.7	1.09	1.4	1.28		0.0139	0.0471	0.1104	0.0544	0.875	0.684	0.6034	0.3763	0.0229	0.1932	0.2433	0.1873	0.5379	0.312	0.6215	0.4379	0.0063	0.0222	0.0958	0.6317
	1430			N-acetyl-glucosamine 1-phosphate	LC/MS polar	15741	C04256	HMDB0001367	440364					0.98	0.59	0.85	0.64	1.21	0.61	0.86	0.65	1.23	1.42	1.07	2.04	0.75	1.43	1.9		0.1755	0.1208	0.0504	0.0302	0.3297	0.6211	0.962	0.4963	0.0583	0.2575	0.5032	0.3048	0.1221	0.1492	0.555	0.4135	0.0526	0.0812	0.4736	0.7971
	1436			N-acetylneuraminate	LC/MS polar	32377	C00270	HMDB0000230	439197					1.18	0.93	1.21	1.28	1.17	0.79	1.03	1.08	0.99	1.31	1.38	1.26	1.05	0.96	0.92		0.5191	0.2265	0.145	0.0673	0.7621	0.6585	0.3203	0.2578	0.5443	0.5434	0.5	0.3037	0.4827	0.2983	0.3297	0.3115	0.114	0.1332	0.7461	0.8407
	1448			N-acetylglucosaminylasparagine	LC/MS pos early	48149	C04540	HMDB0000489	123826					1.03	0.87	1.35	1.4	1.13	0.85	1.31	1.36	1.1	1.55	1.61	1.3	1.04	0.84	0.81		0.7126	0.2767	0.413	0.1525	0.7029	0.6489	0.975	0.4996	0.4614	0.511	0.6833	0.3806	0.7793	0.3809	0.5998	0.4299	0.4427	0.2936	0.7064	0.8407
	1449			erythronate*	LC/MS polar	42420		HMDB0000613	2781043					0.93	1	0.82	0.74	0.81	1.07	0.88	0.79	0.87	0.83	0.74	0.81	0.9	0.98	1.09		0.0246	0.0577	0.3535	0.135	0.217	0.6099	0.4673	0.3173	0.9572	0.6696	0.0882	0.1019	0.0097	0.0683	0.0619	0.1121	0.5005	0.315	0.3154	0.7701
	1451			N-acetylglucosamine/N-acetylgalactosamine	LC/MS pos early	46539	C01074	HMDB0000212 HMDB0000215	84265;439174					1.07	0.98	0.85	0.92	1.08	0.91	0.79	0.86	1	0.87	0.94	1.1	1.08	1.26	1.17		0.6524	0.2628	0.8872	0.2662	0.5801	0.6334	0.6085	0.3772	0.9925	0.6772	0.4373	0.2822	0.7781	0.3807	0.8248	0.5005	0.602	0.3478	0.2011	0.7154
	1452			N-glycolylneuraminate	LC/MS pos early	37123	C03410	HMDB0000833	123802					1.28	0.84	0.77	0.6	1.53	0.66	0.6	0.47	1.2	0.92	0.71	1.81	0.78	1.98	2.55		0.037	0.0671	0.0015	0.002	0.003	0.3819	0.2743	0.2357	0.2027	0.3802	0.1712	0.15	0.0071	0.0618	0.0462	0.0923	0.0213	0.0459	0.0169	0.3799
	1453		Advanced Glycation End-product	N6-carboxymethyllysine	LC/MS pos early	36713		HMDB0240347	123800					0.66	0.75	1.55	1.09	0.76	1.13	2.34	1.65	1.15	2.08	1.46	1.02	0.7	0.49	0.7		0.5547	0.2349	0.8693	0.2629	0.0336	0.6099	0.1073	0.1291	0.1825	0.3647	0.4223	0.2753	0.3723	0.2592	0.2635	0.2773	0.7717	0.3976	0.0187	0.3896
	1457	Energy	TCA Cycle	citrate	LC/MS neg	1564	C00158	HMDB0000094	311					1.12	0.96	1.04	0.85	1.17	0.86	0.93	0.76	1.05	1.08	0.88	1.22	0.82	1.13	1.38		0.451	0.2115	0.003	0.0033	0.1582	0.6099	0.2343	0.2141	0.5085	0.5342	0.838	0.4345	0.0761	0.1198	0.1159	0.1637	0.0686	0.0926	0.3222	0.7731
	1459			aconitate [cis or trans]	LC/MS neg	46173	C02341 C004174	HMDB0000958 HMDB000072	643757;444212					1.26	0.98	0.99	0.88	1.09	0.78	0.79	0.7	0.86	1.01	0.9	1.11	0.89	1.1	1.23		0.0391	0.0685	0.0038	0.004	0.1249	0.6099	0.0079	0.0244	0.8034	0.6235	0.8675	0.4435	0.1488	0.1647	0.3296	0.3115	0.0041	0.0163	0.0052	0.2904
	1461			isocitrate	LC/MS pos early	12110	C00451	HMDB0001874	5318532					1.39	1.14	1.12	1.07	1.4	0.82	0.81	0.77	1.01	0.98	0.94	1.23	0.96	1.25	1.3		0.4281	0.2061	0.0042	0.0043	0.061	0.6099	0.0046	0.017	0.3199	0.4664	0.4351	0.2813	0.5764	0.3221	0.0041	0.0191	0.0518	0.0807	0.032	0.4708
	1462			isocitric lactone	LC/MS polar	54724			98259					1.04	0.9	0.97	1.04	1.06	0.87	0.93	1	1.02	1.07	1.15	1.18	1.08	1.1	1.02		0.4075	0.1986	0.4042	0.1498	0.909	0.6924	0.5873	0.3698	0.4105	0.494	0.944	0.4688	0.7073	0.3611	0.5989	0.4299	0.176	0.1706	0.5402	0.8085
	1463			alpha-ketoglutarate	LC/MS polar	528	C00026	HMDB0000208	51					1.25	0.87	0.97	1.28	1.39	0.69	0.77	1.02	1.11	1.11	1.47	1.6	1.32	1.44	1.09		0.0524	0.0741	0.3065	0.1195	0.7213	0.6501	0.2239	0.2075	0.5346	0.5416	0.848	0.4366	0.1984	0.1904	0.1597	0.2032	0.0704	0.0937	0.1612	0.6879
	1465			succinylcarnitine (C4-DC)	LC/MS pos early	37058		HMDB0061717	71464481					1.06	0.91	1.78	1.44	1.09	0.85	1.67	1.35	1.02	1.96	1.58	1.2	0.81	0.61	0.76		0.7809	0.296	0.3914	0.1461	0.2608	0.6099	0.9584	0.4957	0.6823	0.5904	0.1619	0.1442	0.568	0.321	0.8538	0.5094	0.6445	0.3614	0.1775	0.7071
	1466			succinate	LC/MS polar	1437	C00042	HMDB0000254	1110					0.94	0.72	0.82	0.99	1.12	0.76	0.87	1.04	1.19	1.14	1.37	1.56	1.2	1.37	1.14		0.0066	0.0419	0.3324	0.128	0.6517	0.6447	0.8506	0.4644	0.0264	0.1933	0.1984	0.1648	0.9512	0.4294	0.3493	0.3222	0.0405	0.0699	0.2699	0.7483
	1467			fumarate	LC/MS polar	1643	C00122	HMDB0000134	444972					0.99	0.74	0.84	1.27	1.14	0.75	0.85	1.28	1.15	1.13	1.71	1.54	1.52	1.36	0.9		0.0081	0.044	0.793	0.2455	0.8452	0.678	0.7276	0.4255	0.2064	0.3832	0.3956	0.2655	0.1603	0.1717	0.2728	0.2827	0.1102	0.1302	0.2339	0.7205
	1469			malate	LC/MS neg	1303	C00497 C00149 C00711	HMDB0000744 HMDB0031518 HMDB0000156	525					1.02	0.78	0.89	1.21	1.11	0.77	0.87	1.19	1.09	1.13	1.54	1.42	1.36	1.25	0.92		0.0193	0.0516	0.7774	0.2415	0.7816	0.6639	0.6993	0.4163	0.2258	0.3975	0.475	0.2952	0.1946	0.1883	0.3661	0.3336	0.1136	0.1331	0.2738	0.7483
	1473			itaconate	LC/MS polar	18373	C00490	HMDB0002092	811					1.3	0.84	0.65	0.73	0.98	0.64	0.5	0.56	0.75	0.78	0.87	1.17	1.11	1.5	1.35		0.0116	0.0471	0.3013	0.1178	0.5817	0.6334	0.365	0.2768	0.1039	0.3157	0.0641	0.0831	0.2491	0.2135	0.9752	0.5435	0.0139	0.0375	0.0076	0.3345
	1478			2-methylcitrate/homocitrate	LC/MS neg	52282	C01251	HMDB0003518 HMDB0000379	515;439459					0.93	0.85	0.71	0.92	0.98	0.91	0.77	0.99	1.06	0.84	1.09	1.15	1.3	1.38	1.06		0.0154	0.0471	0.5169	0.1779	0.5372	0.6261	0.6042	0.3763	0.1014	0.3137	0.0088	0.0248	0.4935	0.2989	0.8333	0.5016	0.2545	0.2144	0.0308	0.4708
	1480			citraconate/glutaconate	LC/MS polar	47076	C02226 C02214	HMDB0000620 HMDB0000634	643798;5280498					1.31	0.98	0.86	0.84	0.85	0.75	0.65	0.64	0.65	0.87	0.85	0.86	0.98	0.99	1.01		0.13	0.1074	0.8278	0.2542	0.6708	0.6447	0.4282	0.3	0.4369	0.5048	0.2207	0.1748	0.5103	0.3056	0.5348	0.4075	0.1211	0.1388	0.0479	0.5054
	1486		Oxidative Phosphorylation	phosphate	LC/MS pos early	42109	C00009	HMDB0001429	1061					1.57	1.61	1.59	1.51	1.52	1.03	1.01	0.96	0.97	0.99	0.94	0.95	0.95	0.96	1.01		0.5035	0.2241	0.2477	0.1007	0.1867	0.6099	0.0337	0.0587	0.0553	0.251	0.0771	0.094	0.0924	0.1311	0.0945	0.1482	0.8216	0.4147	0.7006	0.8407
	1489	Lipid	Fatty Acid Synthesis	malonylcarnitine	LC/MS pos early	37059		HMDB0002095	22833583					1.25	1.28	1.71	1.7	1.55	1.02	1.36	1.36	1.24	1.34	1.33	1.21	1	0.91	0.91		0.2847	0.1571	0.2923	0.116	0.5599	0.6261	0.3842	0.2845	0.4038	0.4924	0.0464	0.0681	0.1361	0.1585	0.2099	0.2417	0.9713	0.4536	0.245	0.7461
	1490			malonate	LC/MS polar	15872	C00383	HMDB0000691	867					0.82	0.74	0.66	0.81	1.02	0.91	0.81	0.99	1.25	0.89	1.08	1.37	1.22	1.55	1.27		0.0258	0.059	0.5717	0.192	0.1308	0.6099	0.1542	0.1615	0.0468	0.2368	0.006	0.0204	0.1614	0.172	0.9212	0.5306	0.5505	0.3325	0.1514	0.6746
	1505		Short Chain Fatty Acid	butyrate/isobutyrate (4:0)	LC/MS neg	40605	C00246	HMDB0000039	264					0.72	0.67	0.75	0.72	0.7	0.92	1.03	1	0.96	1.12	1.08	1.04	0.97	0.93	0.96		0.7739	0.2944	0.7357	0.2337	0.7856	0.6656	0.4552	0.3114	0.3366	0.4763	0.4312	0.2795	0.5491	0.3156	0.5411	0.4111	0.8279	0.4171	0.9674	0.8558
	1506			valerate (5:0)	LC/MS neg	33443	C00803	HMDB0000892	7991					1.02	0.61	0.83	0.93	0.94	0.59	0.81	0.91	0.92	1.37	1.54	1.55	1.13	1.13	1.01		0.4859	0.2202	0.8827	0.2661	0.9859	0.7119	0.8507	0.4644	0.4634	0.5123	0.3993	0.2655	0.9675	0.4333	0.9976	0.5486	0.5846	0.3415	0.5113	0.8015
	1507		Medium Chain Fatty Acid	caproate (6:0)	LC/MS neg	32489	C01585	HMDB0000535	8892					0.67	0.86	0.84	0.93	0.67	1.28	1.25	1.38	1	0.98	1.07	0.78	1.1	0.8	0.73		0.8178	0.3049	0.0393	0.025	0.409	0.6261	0.0417	0.0688	0.4108	0.494	0.3028	0.2209	0.4989	0.3005	0.0463	0.0923	0.209	0.1899	0.2935	0.754
	1508			heptanoate (7:0)	LC/MS neg	1644	C17714	HMDB0000666	8094					0.7	1.04	0.66	0.64	0.65	1.48	0.94	0.92	0.93	0.63	0.62	0.63	0.98	0.99	1.01		0.1613	0.1162	0.0709	0.0394	0.2981	0.6099	0.0782	0.1042	0.599	0.5616	0.038	0.0611	0.0233	0.0964	0.0377	0.081	0.2079	0.1897	0.7353	0.8407
	1509			caprylate (8:0)	LC/MS neg	32492	C06423	HMDB0000482	379					1.61	1.24	1.48	1.12	1.17	0.77	0.92	0.7	0.72	1.19	0.9	0.94	0.76	0.79	1.04		0.7526	0.2884	0.4362	0.1584	0.7193	0.6492	0.2701	0.2338	0.5405	0.5423	0.4757	0.2952	0.9283	0.4257	0.8184	0.4995	0.6186	0.3527	0.692	0.8407
	1512			caprate (10:0)	LC/MS neg	1642	C01571	HMDB0000511	2969					1.09	1.03	1.21	0.91	1.27	0.94	1.11	0.83	1.16	1.18	0.89	1.23	0.75	1.05	1.39		0.8018	0.3011	0.0198	0.0146	0.4218	0.6261	0.4921	0.3273	0.7797	0.6149	0.1888	0.1587	0.5627	0.3202	0.0669	0.1165	0.6826	0.3745	0.5227	0.8015
	1513			cis-4-decenoate (10:1n6)*	LC/MS neg	62873		HMDB0004980	5282726					2.01	1	2.06	1.44	2.78	0.5	1.02	0.72	1.38	2.06	1.44	2.78	0.7	1.35	1.93		0.0996	0.0924	6.6744e-07	3.5332e-06	0.9961	0.712	0.0011	0.0071	1	0.6772	0.0016	0.0083	0.1791	0.1821	2.5621e-05	0.0006	0.0011	0.0067	0.9043	0.8419
	1516			(2 or 3)-decenoate (10:1n7 or n8)	LC/MS neg	63436								1.64	0.61	1.25	0.61	1.64	0.37	0.76	0.37	1	2.04	1	2.69	0.49	1.32	2.7		0.1331	0.1079	0.0001	0.0002	0.7416	0.653	0.0649	0.0932	0.0954	0.3086	0.3436	0.2406	0.0936	0.1319	0.221	0.2505	0.0009	0.0059	0.3512	0.7908
	1518			10-undecenoate (11:1n1)	LC/MS neg	32497	C13910	HMDB0033724	14891					1.58	0.56	1.46	0.7	2.07	0.35	0.93	0.45	1.32	2.63	1.27	3.73	0.48	1.42	2.94		0.0679	0.0825	4.7669e-06	1.8554e-05	0.2509	0.6099	0.0761	0.1028	0.0258	0.1933	0.3478	0.2424	0.1462	0.1627	0.01	0.0362	0.0002	0.0018	0.3872	0.7971
	1520			laurate (12:0)	LC/MS neg	1645	C02679	HMDB0000638	3893					1.17	1.33	1.68	1.18	1.4	1.14	1.43	1	1.2	1.26	0.88	1.05	0.7	0.84	1.19		0.1576	0.1149	0.2014	0.0863	0.9972	0.712	0.4221	0.2972	0.1626	0.3647	0.0385	0.0616	0.3696	0.2579	0.1123	0.1632	0.5435	0.3311	0.1899	0.7154
	1522			5-dodecenoate (12:1n7)	LC/MS neg	33968		HMDB0000529	5312378					0.59	1.25	1.01	1.76	1.06	2.14	1.72	3	1.8	0.8	1.4	0.84	1.75	1.05	0.6		0.0624	0.0802	0.0082	0.0073	0.6993	0.6485	0.2434	0.2194	0.1915	0.3695	0.9798	0.4752	0.0326	0.1016	0.9373	0.5349	0.0164	0.0403	0.2535	0.7483
	1525		Long Chain Saturated Fatty Acid	myristate (14:0)	LC/MS neg	1365	C06424	HMDB0000806	11005					1.35	1.57	2.1	1.58	1.46	1.16	1.55	1.17	1.08	1.34	1.01	0.93	0.75	0.69	0.92		0.015	0.0471	0.1716	0.0761	0.283	0.6099	0.0724	0.0991	0.0152	0.1693	0.0012	0.0069	0.0123	0.0786	0.0328	0.0733	0.4904	0.3115	0.1021	0.6317
	1527			pentadecanoate (15:0)	LC/MS neg	1361	C16537	HMDB0000826	13849					1.4	1.01	1.46	0.94	1.34	0.72	1.04	0.67	0.95	1.44	0.93	1.32	0.64	0.92	1.42		0.6535	0.2628	1.6606e-06	7.8483e-06	0.9989	0.7123	0.002	0.0101	0.777	0.6145	0.0011	0.0066	0.7123	0.3631	0.0061	0.0261	0.0042	0.0166	0.8248	0.8409
	1528			palmitate (16:0)	LC/MS neg	1336	C00249	HMDB0000220	985					1.25	1.09	1.34	0.83	1.18	0.87	1.07	0.66	0.94	1.23	0.76	1.08	0.62	0.88	1.41		0.1582	0.1149	0.0008	0.0011	0.7785	0.6622	0.0453	0.0725	0.3747	0.4921	0.0154	0.0348	0.3264	0.2424	0.1072	0.1581	0.2475	0.2134	0.6407	0.8257
	1530			margarate (17:0)	LC/MS neg	1121		HMDB0002259	10465					2.12	0.8	2.12	0.72	1.88	0.38	1	0.34	0.89	2.66	0.9	2.36	0.34	0.89	2.62		0.4017	0.1967	1.1348e-09	1.7668e-08	0.8523	0.6812	0.0001	0.0015	0.4592	0.511	0.0003	0.0033	0.1805	0.1826	0.0007	0.0054	1.3607e-05	0.0002	0.7567	0.8407
	1532			stearate (18:0)	LC/MS neg	1358	C01530	HMDB0000827	5281					1.74	0.94	1.69	0.66	1.56	0.54	0.97	0.38	0.9	1.8	0.7	1.67	0.39	0.93	2.37		0.1883	0.1243	9.0678e-08	6.8186e-07	0.4652	0.6261	0.0012	0.0072	0.973	0.676	0.0029	0.0126	0.0695	0.1162	0.0052	0.0229	0.0013	0.007	0.7458	0.8407
	1534			nonadecanoate (19:0)	LC/MS neg	1356	C16535	HMDB0000772	12591					1.49	0.69	1.2	0.52	1.18	0.46	0.81	0.35	0.8	1.75	0.75	1.72	0.43	0.98	2.29		0.0545	0.0749	7.5118e-06	2.6868e-05	0.5691	0.6289	0.0156	0.0358	0.2486	0.41	0.1555	0.1404	0.0203	0.0892	0.1524	0.1958	0.0007	0.0049	0.2836	0.7483
	1535			arachidate (20:0)	LC/MS neg	1118	C06425	HMDB0002212	10467					1.68	0.71	1.42	0.43	1.29	0.42	0.84	0.26	0.77	1.99	0.61	1.81	0.31	0.91	2.98		0.0994	0.0924	1.869e-05	5.4363e-05	0.4947	0.6261	0.015	0.0348	0.5752	0.5525	0.1148	0.1172	0.035	0.1026	0.1165	0.1637	0.0035	0.0147	0.3538	0.7908
	1544		Long Chain Monounsaturated Fatty Acid	myristoleate (14:1n5)	LC/MS neg	32418	C08322	HMDB0002000	5281119					2.52	1.8	3.79	2.38	3.02	0.72	1.5	0.95	1.2	2.1	1.32	1.67	0.63	0.8	1.27		0.0179	0.0513	0.0007	0.001	0.1183	0.6099	0.0006	0.0048	0.0136	0.1693	7.9314e-05	0.0013	0.0014	0.0458	0.0001	0.0019	0.253	0.2138	0.4923	0.8015
	1547			palmitoleate (16:1n7)	LC/MS neg	33447	C08362	HMDB0003229	445638					0.86	1.65	1.38	1.36	0.94	1.91	1.61	1.58	1.09	0.84	0.83	0.57	0.98	0.68	0.69		0.0089	0.0443	0.263	0.1061	0.5333	0.6261	0.8988	0.4778	0.0106	0.1568	0.0456	0.0673	0.069	0.1162	0.6888	0.4609	0.0145	0.0379	0.0599	0.5421
	1549			10-heptadecenoate (17:1n7)	LC/MS neg	33971		HMDB0060038	5312435					2.12	1.18	2.71	0.99	2.06	0.56	1.28	0.47	0.97	2.3	0.84	1.75	0.36	0.76	2.09		0.3153	0.167	3.854e-07	2.1615e-06	0.9901	0.7119	0.0008	0.0059	0.3268	0.47	7.6832e-05	0.0013	0.9547	0.4294	0.0011	0.0077	0.0113	0.0322	0.4307	0.7971
	1551			oleate/vaccenate (18:1)	LC/MS neg	52285	C01712 C08367 C00712 C21944	HMDB0000207 HMDB0000573 HMDB0003231 HMDB0240219	637517;445639;5281127;5282761					1.31	1.18	1.5	0.86	1.26	0.9	1.15	0.66	0.97	1.27	0.73	1.07	0.58	0.84	1.46		0.0879	0.0888	0.0011	0.0015	0.7101	0.6492	0.0637	0.0921	0.2493	0.4101	0.0105	0.0272	0.3209	0.2401	0.102	0.1536	0.4626	0.3015	0.4361	0.7971
	1558			10-nonadecenoate (19:1n9)	LC/MS neg	33972		HMDB0013622	5312513					1.85	1.09	2.19	0.94	1.83	0.59	1.18	0.51	0.99	2	0.85	1.67	0.43	0.83	1.95		0.4694	0.2168	2.0801e-06	9.3316e-06	0.9436	0.7014	0.0024	0.0118	0.4121	0.4947	0.0005	0.004	0.8255	0.3952	0.0024	0.013	0.0196	0.0439	0.5742	0.8156
	1561			eicosenoate (20:1)	LC/MS neg	33587	C16526	HMDB0002231 HMDB0062436	5282769;5282768;94159					1.59	1.17	2	0.78	1.56	0.74	1.26	0.49	0.98	1.71	0.66	1.33	0.39	0.78	2		0.2358	0.143	8.297e-05	0.0002	0.7112	0.6492	0.0262	0.0493	0.4041	0.4924	0.0052	0.019	0.3642	0.2567	0.0267	0.0644	0.1488	0.1542	0.5143	0.8015
	1565			erucate (22:1n9)	LC/MS neg	1552	C08316	HMDB0002068	8216;5281116					1.96	0.91	1.87	0.68	1.71	0.46	0.95	0.35	0.87	2.05	0.75	1.87	0.36	0.91	2.51		0.6671	0.2659	1.7565e-05	5.3314e-05	0.6676	0.6447	0.0046	0.017	0.8475	0.6392	0.0246	0.0467	0.4168	0.2749	0.0142	0.0454	0.0076	0.025	0.5027	0.8015
	1568		Long Chain Polyunsaturated Fatty Acid (n3 and n6)	tetradecadienoate (14:2)*	LC/MS neg	62850		HMDB0000560	5312409					1.21	1.14	1.6	2.18	1.62	0.94	1.33	1.8	1.34	1.41	1.92	1.43	1.36	1.01	0.74		0.0215	0.0545	0.5999	0.1992	0.3537	0.6211	0.3594	0.2765	0.4291	0.5048	0.1023	0.1111	0.0054	0.0618	0.0458	0.0921	0.8983	0.4374	0.4592	0.7971
	1569			hexadecatrienoate (16:3n3)	LC/MS neg	57651			91820460					1.42	0.79	2.15	2.02	1.35	0.56	1.52	1.43	0.95	2.72	2.57	1.71	0.94	0.63	0.67		0.3227	0.169	0.1226	0.0594	0.019	0.6099	0.2715	0.2341	0.5716	0.5525	0.025	0.0472	0.0302	0.1002	0.3388	0.3176	0.1001	0.1203	0.2298	0.7205
	1575			stearidonate (18:4n3)	LC/MS neg	33969	C16300	HMDB0006547	5312508					1.35	1.17	1.48	0.69	0.98	0.87	1.1	0.51	0.73	1.26	0.59	0.84	0.46	0.66	1.43		0.0901	0.089	0.0541	0.0315	0.6463	0.6447	0.2048	0.1964	0.5023	0.5307	0.2773	0.2072	0.1498	0.1649	0.796	0.4945	0.5433	0.3311	0.8518	0.8419
	1578			eicosapentaenoate (EPA; 20:5n3)	LC/MS neg	18467	C06428	HMDB0001999	446284					1.91	1.64	1.89	0.76	1.44	0.86	0.99	0.4	0.75	1.15	0.46	0.88	0.4	0.76	1.89		0.0847	0.0875	0.0027	0.0031	0.5129	0.6261	0.0216	0.044	0.1221	0.3364	0.0175	0.0369	0.4766	0.2958	0.132	0.1755	0.4179	0.2855	0.9297	0.8477
	1580			docosapentaenoate (n3 DPA; 22:5n3)	LC/MS neg	32504	C16513	HMDB0001976 HMDB0006528	6441454					2.67	1.54	3.19	0.87	2.26	0.58	1.19	0.32	0.85	2.07	0.56	1.47	0.27	0.71	2.61		0.1268	0.1064	1.6902e-06	7.8483e-06	0.6239	0.6447	0.0006	0.0047	0.1171	0.3316	0.0002	0.0025	0.6911	0.3568	0.0028	0.0144	0.0368	0.0657	0.7393	0.8407
	1581			docosahexaenoate (DHA; 22:6n3)	LC/MS neg	44675	C06429	HMDB0002183	445580					1.68	1.12	1.69	0.72	1.45	0.67	1	0.43	0.86	1.51	0.64	1.29	0.43	0.86	2.01		0.1927	0.1252	3.2517e-05	8.6936e-05	0.6763	0.6447	0.0068	0.0217	0.452	0.5096	0.0078	0.0234	0.2664	0.2211	0.0373	0.0804	0.0415	0.0706	0.9537	0.8541
	1582			docosatrienoate (22:3n3)	LC/MS neg	32417	C16534	HMDB0002823	5312556					1.42	0.99	1.29	0.63	1.22	0.7	0.91	0.44	0.86	1.31	0.64	1.24	0.49	0.94	1.95		0.2485	0.1457	0.0004	0.0006	0.3995	0.6261	0.0312	0.0552	0.6167	0.5713	0.0811	0.0962	0.1369	0.1586	0.0961	0.1493	0.0909	0.1137	0.6574	0.8257
	1583			nisinate (24:6n3)	LC/MS neg	57810		HMDB0013025	11792612					1.63	1.11	1.31	0.73	1.33	0.68	0.8	0.45	0.82	1.18	0.66	1.2	0.56	1.02	1.82		0.5082	0.2242	0.0018	0.0022	0.2971	0.6099	0.0174	0.0385	0.384	0.4921	0.1316	0.1267	0.4081	0.2714	0.0713	0.1213	0.1158	0.1345	0.3483	0.7908
	1584			hexadecadienoate (16:2n6)	LC/MS neg	57652		HMDB0000477	13932172					1.28	1.29	1.8	1.28	1.36	1.01	1.41	1	1.07	1.4	0.99	1.06	0.71	0.76	1.06		0.173	0.1202	0.101	0.051	0.7332	0.6501	0.188	0.1862	0.1695	0.3647	0.012	0.0296	0.211	0.1967	0.1179	0.1642	0.9526	0.4483	0.2001	0.7154
	1585			linoleate (18:2n6)	LC/MS neg	1105	C01595	HMDB0000673 HMDB0006270	5280450					1.35	1.14	1.64	1	1.31	0.85	1.21	0.74	0.97	1.43	0.88	1.15	0.61	0.8	1.31		0.4221	0.204	0.0036	0.0039	0.9833	0.7119	0.0656	0.094	0.3957	0.4922	0.0105	0.0272	0.8752	0.4082	0.0789	0.1284	0.3057	0.2383	0.4281	0.7971
	1587			linolenate [alpha or gamma; (18:3n3 or 6)]	LC/MS neg	34035	C06426 C06427	HMDB0001388 HMDB0003073	5280933;5280934					1.42	1.5	1.94	1.42	1.32	1.06	1.37	1	0.93	1.29	0.94	0.88	0.73	0.68	0.93		0.2084	0.1328	0.1017	0.0511	0.5914	0.6348	0.1033	0.1267	0.12	0.3349	0.0129	0.0309	0.2309	0.2057	0.1605	0.2032	0.9378	0.4442	0.3507	0.7908
	1588			dihomo-linoleate (20:2n6)	LC/MS neg	17805	C16525	HMDB0005060	6439848					2.18	1.16	2.62	0.84	2.06	0.53	1.21	0.39	0.95	2.26	0.72	1.77	0.32	0.79	2.45		0.2974	0.1613	2.3836e-07	1.5021e-06	0.8503	0.6804	0.0008	0.0059	0.3558	0.4915	0.0002	0.0022	0.575	0.3221	0.0012	0.0082	0.01	0.0292	0.588	0.8156
	1590			dihomo-linolenate (20:3n3 or n6)	LC/MS neg	35718	C03242	HMDB0002925	5280581					1.22	1.24	1.57	0.58	1.1	1.02	1.3	0.47	0.9	1.27	0.47	0.89	0.37	0.7	1.9		0.0475	0.0724	0.0019	0.0023	0.6349	0.6447	0.0996	0.1227	0.2565	0.4164	0.0144	0.0333	0.1991	0.1904	0.1708	0.2128	0.5944	0.3453	0.3837	0.7971
	1591			arachidonate (20:4n6)	LC/MS neg	1110	C00219	HMDB0001043	444899					1.51	1.14	1.66	0.69	1.41	0.76	1.1	0.46	0.93	1.45	0.61	1.23	0.42	0.85	2.03		0.0673	0.0825	1.5826e-05	4.9281e-05	0.4836	0.6261	0.0094	0.0267	0.2744	0.4275	0.0029	0.0126	0.1563	0.1688	0.0244	0.0611	0.111	0.1308	0.6508	0.8257
	1592			docosatrienoate (22:3n6)*	LC/MS neg	57467			75955220					1.08	1.27	1.36	0.77	1.27	1.18	1.25	0.71	1.18	1.07	0.6	1	0.57	0.94	1.66		0.1534	0.1143	0.0638	0.036	0.2602	0.6099	0.434	0.3032	0.1807	0.3647	0.149	0.1363	0.2653	0.2211	0.2087	0.2415	0.5696	0.3384	0.4986	0.8015
	1593			adrenate (22:4n6)	LC/MS neg	32980	C16527	HMDB0002226	5497181;5282844					1.74	1.26	1.96	1	1.77	0.73	1.13	0.58	1.02	1.55	0.79	1.4	0.51	0.9	1.77		0.3146	0.167	1.5707e-05	4.9281e-05	0.6215	0.6447	0.0031	0.014	0.1493	0.3528	0.0011	0.0066	0.8951	0.4157	0.0025	0.0135	0.0993	0.1197	0.6953	0.8407
	1594			docosapentaenoate (n6 DPA; 22:5n6)	LC/MS neg	37478	C16513	HMDB0001976	6441454					1.75	1.09	1.67	1.01	1.91	0.62	0.96	0.58	1.09	1.53	0.92	1.75	0.6	1.15	1.9		0.9277	0.3322	8.4294e-05	0.0002	0.4866	0.6261	0.0061	0.0201	0.3779	0.4921	0.0183	0.0381	0.9076	0.4196	0.0022	0.0123	0.0506	0.0793	0.6603	0.8258
	1595			docosadienoate (22:2n6)	LC/MS neg	32415	C16533	HMDB0061714	5282807					1.78	0.93	1.82	0.84	1.76	0.52	1.02	0.47	0.99	1.96	0.9	1.9	0.46	0.97	2.1		0.8995	0.325	2.1309e-06	9.4002e-06	0.8301	0.6759	0.0039	0.0159	0.9572	0.6696	0.0051	0.0189	0.5372	0.312	0.0035	0.0168	0.0045	0.017	0.92	0.8477
	1597			mead acid (20:3n9)	LC/MS neg	35174		HMDB0010378	5312531					1.48	1.36	1.79	0.73	1.49	0.92	1.21	0.49	1.01	1.31	0.53	1.09	0.41	0.83	2.05		0.0693	0.0825	0.0005	0.0007	0.2659	0.6099	0.0268	0.0499	0.0783	0.2913	0.0077	0.0232	0.3197	0.2401	0.0249	0.062	0.6225	0.3533	0.611	0.8166
	1648		Fatty Acid, Branched	citronellic acid	LC/MS neg	64173	C16462	HMDB35837	10402					2.12	0.56	0.98	1.07	1.86	0.26	0.46	0.5	0.88	1.75	1.91	3.32	1.09	1.9	1.74		0.0055	0.0379	0.0882	0.046	0.8503	0.6804	0.1492	0.1587	0.0584	0.2575	0.2688	0.2022	0.972	0.4348	0.4493	0.3664	0.0015	0.0081	0.0135	0.3557
	1655			(12 or 13)-methylmyristate (a15:0 or i15:0)	LC/MS neg	38293		HMDB0061707	151014					1	1.05	1.32	1.26	1.04	1.06	1.32	1.26	1.04	1.25	1.19	0.99	0.95	0.79	0.83		0.2398	0.143	0.8302	0.2546	0.2828	0.6099	0.6401	0.3918	0.41	0.494	0.067	0.0858	0.0834	0.1256	0.534	0.4075	0.7194	0.3835	0.165	0.6879
	1660			(14 or 15)-methylpalmitate (a17:0 or i17:0)	LC/MS neg	38768	C16995	HMDB0061859	8181;17903417					1.16	0.97	1.35	0.85	1.05	0.84	1.16	0.73	0.91	1.39	0.87	1.08	0.63	0.78	1.24		0.3334	0.1734	0.0122	0.0101	0.939	0.7014	0.1932	0.1893	0.7809	0.6149	0.0441	0.0665	0.5524	0.3169	0.4077	0.3499	0.3026	0.2369	0.4523	0.7971
	1666			(16 or 17)-methylstearate (a19:0 or i19:0)	LC/MS neg	38296		HMDB0037397	3083779					1.07	0.83	0.97	0.66	0.89	0.77	0.9	0.62	0.83	1.16	0.8	1.07	0.69	0.92	1.34		0.2011	0.1297	0.0449	0.0278	0.7231	0.6501	0.327	0.2605	0.6924	0.5949	0.721	0.3945	0.0953	0.1335	0.895	0.5214	0.1723	0.1697	0.5302	0.8015
	1671			18-methylnonadecanoate (i20:0)	LC/MS neg	62781			4383090					0.98	0.75	1.11	0.59	0.86	0.76	1.13	0.6	0.88	1.48	0.79	1.16	0.53	0.78	1.47		0.3566	0.1822	0.0283	0.0192	0.8404	0.6778	0.3527	0.2762	0.8307	0.6366	0.3084	0.2231	0.1903	0.1874	0.6671	0.4537	0.2549	0.2144	0.9275	0.8477
	1677		Fatty Acid, Dicarboxylate	glutarate (C5-DC)	LC/MS polar	396	C00489	HMDB0000661	743;4418048					0.6	0.71	0.6	0.84	0.79	1.19	1.01	1.41	1.33	0.85	1.19	1.12	1.4	1.32	0.94		0.1501	0.1126	0.0546	0.0317	0.1144	0.6099	0.0078	0.0244	0.0398	0.2182	0.0063	0.0208	0.2103	0.1967	0.2662	0.279	0.4977	0.3147	0.9342	0.8489
	1681			2-hydroxyglutarate	LC/MS pos early	37253	C02630	HMDB0059655	43					0.94	0.86	0.91	1.18	1.11	0.92	0.97	1.26	1.19	1.06	1.37	1.29	1.3	1.22	0.94		0.1583	0.1149	0.6203	0.2052	0.9395	0.7014	0.6893	0.4126	0.8853	0.6542	0.7542	0.4076	0.1871	0.1861	0.1865	0.2246	0.5869	0.3419	0.9308	0.8477
	1683			adipate (C6-DC)	LC/MS polar	21134	C06104	HMDB0000448	196					0.82	0.83	0.93	0.88	1.16	1	1.13	1.07	1.41	1.12	1.06	1.4	0.95	1.25	1.32		0.6827	0.2692	0.4322	0.1574	0.2025	0.6099	0.3499	0.2754	0.2682	0.4246	0.6941	0.3839	0.3548	0.2523	0.5151	0.3992	0.8602	0.4285	0.5852	0.8156
	1685			2-hydroxyadipate	LC/MS polar	31934	C02360	HMDB0000321	193530					0.69	0.82	0.53	0.86	0.64	1.2	0.76	1.25	0.92	0.64	1.05	0.77	1.64	1.21	0.74		0.2573	0.1484	0.0383	0.0245	0.9414	0.7014	0.1526	0.1609	0.2174	0.3922	0.0155	0.0349	0.5253	0.3094	0.1145	0.1637	0.838	0.4207	0.287	0.7483
	1686			3-hydroxyadipate	LC/MS polar	62069		HMDB0000345	151913					1.07	0.73	1.14	0.87	1.21	0.68	1.06	0.81	1.12	1.55	1.19	1.64	0.77	1.06	1.38		0.7415	0.2858	0.0945	0.0484	0.5598	0.6261	0.9147	0.4844	0.2296	0.4002	0.7846	0.4188	0.3112	0.2401	0.7346	0.478	0.1919	0.1823	0.8679	0.8419
	1689			maleate	LC/MS polar	20676	C01384	HMDB0000176	444266					0.54	0.78	0.57	0.93	0.59	1.45	1.06	1.74	1.09	0.73	1.2	0.75	1.64	1.03	0.63		0.7626	0.2915	0.0003	0.0005	0.5551	0.6261	0.0029	0.0131	0.2371	0.4029	0.0045	0.017	0.3969	0.267	0.0094	0.0348	0.0536	0.0817	0.8695	0.8419
	1691			pimelate (C7-DC)	LC/MS polar	15704	C02656	HMDB0000857	385					0.16	0.58	0.53	1.02	0.19	3.75	3.4	6.6	1.23	0.91	1.76	0.33	1.94	0.36	0.19		0.7096	0.2762	0.0007	0.001	0.2622	0.6099	0.0015	0.0086	0.1072	0.3209	0.0086	0.0246	0.2001	0.1909	0.0031	0.0156	0.0828	0.1067	0.516	0.8015
	1692			heptenedioate (C7:1-DC)*	LC/MS polar	61866								1.6	0.98	1.54	1.2	1.9	0.61	0.96	0.75	1.19	1.57	1.22	1.94	0.78	1.23	1.59		0.173	0.1202	1.1385e-05	3.871e-05	0.9007	0.6909	0.008	0.0244	0.8891	0.6545	0.0148	0.034	0.4195	0.2753	0.0002	0.0026	0.0055	0.02	0.803	0.8407
	1694			suberate (C8-DC)	LC/MS neg	15730	C08278	HMDB0000893	10457					0.27	0.67	0.69	1.3	0.32	2.47	2.56	4.81	1.17	1.03	1.94	0.47	1.88	0.46	0.24		0.7517	0.2884	0.006	0.0057	0.3021	0.6099	0.0058	0.0197	0.1686	0.3647	0.0341	0.0572	0.1907	0.1874	0.0116	0.0394	0.1351	0.1461	0.4694	0.7971
	1697			azelate (C9-DC)	LC/MS neg	18362	C08261	HMDB0000784	2266					0.09	0.7	0.55	1.02	0.1	7.71	6	11.18	1.09	0.78	1.45	0.14	1.86	0.18	0.1		0.1114	0.1001	0.0015	0.0019	0.1023	0.6099	0.0006	0.0047	0.1739	0.3647	0.0118	0.0296	0.008	0.064	0.0006	0.0054	0.0221	0.0461	0.2667	0.7483
	1699			sebacate (C10-DC)	LC/MS neg	32398	C08277	HMDB0000792	5192					0.51	0.86	0.69	0.81	0.54	1.68	1.35	1.59	1.05	0.8	0.95	0.63	1.18	0.78	0.66		0.282	0.1561	0.0152	0.0119	0.6279	0.6447	0.0391	0.0656	0.658	0.5873	0.2321	0.1805	0.2501	0.2135	0.0112	0.0391	0.0988	0.1193	0.3607	0.7908
	1700			decadienedioic acid (C10:2-DC)**	LC/MS polar	63685			17789717					0.33	0.81	0.52	0.88	0.43	2.44	1.56	2.65	1.29	0.64	1.09	0.53	1.7	0.83	0.49		0.7747	0.2944	0.0009	0.0012	0.5205	0.6261	0.0069	0.0221	0.7104	0.5992	0.1147	0.1172	0.9173	0.4223	0.0439	0.09	0.0175	0.0412	0.2198	0.7205
	1701			undecanedioate (C11-DC)	LC/MS neg	42395		HMDB0000888	15816					0.26	0.75	0.49	1.36	0.28	2.88	1.9	5.23	1.08	0.66	1.81	0.37	2.75	0.57	0.21		0.9287	0.3322	0.0003	0.0006	0.6376	0.6447	0.0066	0.0215	0.5361	0.5419	0.036	0.059	0.6578	0.3458	0.0069	0.0282	0.03	0.0568	0.4847	0.7971
	1704			dodecanedioate (C12-DC)	LC/MS neg	32388	C02678	HMDB0000623	12736					0.19	0.27	0.21	0.84	0.23	1.44	1.12	4.54	1.24	0.78	3.16	0.86	4.07	1.11	0.27		0.3618	0.1837	0.0025	0.0028	0.2346	0.6099	0.0077	0.0241	0.0518	0.2439	0.0171	0.0365	0.8625	0.4048	0.0174	0.0501	0.4213	0.2857	0.7477	0.8407
	1705			3-hydroxydodecanedioate*	LC/MS neg	62915		HMDB0000413	16663321					0.69	0.68	0.72	0.85	0.79	0.99	1.04	1.24	1.15	1.06	1.25	1.17	1.18	1.1	0.93		0.7492	0.2881	0.39	0.146	0.5764	0.6319	0.2458	0.2204	0.2126	0.3888	0.3391	0.2386	0.6562	0.3455	0.289	0.2936	0.9295	0.4424	0.834	0.8419
	1706			dodecenedioate (C12:1-DC)*	LC/MS neg	61864		HMDB0000933	5283028					0.47	0.91	0.51	0.96	0.59	1.93	1.08	2.03	1.24	0.56	1.05	0.64	1.88	1.15	0.61		0.876	0.3209	0.0342	0.0225	0.7469	0.6541	0.066	0.0941	0.5011	0.5307	0.1028	0.1114	0.7244	0.3669	0.2095	0.2417	0.2318	0.2058	0.8257	0.8409
	1707			dodecadienoate (12:2)*	LC/MS neg	62276			25480					2.04	1.19	1.71	2.62	1.45	0.58	0.84	1.29	0.71	1.43	2.2	1.22	1.53	0.85	0.55		0.4592	0.2136	0.488	0.171	0.0964	0.6099	0.0687	0.0969	0.3847	0.4921	0.1467	0.135	0.0199	0.0892	0.2497	0.2655	0.3257	0.2477	0.6965	0.8407
	1709			tetradecanedioate (C14-DC)	LC/MS neg	35669		HMDB0000872	13185					0.34	0.61	0.43	1.27	0.49	1.8	1.27	3.74	1.45	0.71	2.08	0.81	2.94	1.14	0.39		0.187	0.1241	0.0433	0.0271	0.3783	0.6231	0.1661	0.1705	0.4404	0.5051	0.372	0.2536	0.1662	0.1743	0.5021	0.3927	0.5306	0.3276	0.6136	0.8166
	1711			branched chain 14:0 dicarboxylic acid**	LC/MS neg	63191								1.54	0.59	0.95	0.84	1.61	0.38	0.62	0.55	1.05	1.61	1.43	2.73	0.89	1.7	1.91		0.0568	0.0761	0.1352	0.0641	0.9321	0.7011	0.3562	0.2765	0.1323	0.3453	0.3508	0.2437	0.5694	0.321	0.5902	0.427	0.0182	0.0419	0.0682	0.5502
	1712			tetradecadienedioate (C14:2-DC)*	LC/MS neg	62918			86018718					0.35	0.72	0.4	0.97	0.41	2.06	1.13	2.77	1.18	0.55	1.35	0.57	2.44	1.04	0.43		0.5115	0.2251	0.012	0.01	0.7345	0.6503	0.1364	0.1519	0.6092	0.5686	0.1458	0.1345	0.4026	0.2682	0.2231	0.2512	0.3203	0.2456	0.971	0.8558
	1713			hexadecanedioate (C16-DC)	LC/MS neg	35678	C19615	HMDB0000672	10459					0.71	0.75	0.74	1.49	0.93	1.05	1.04	2.1	1.31	0.99	2	1.25	2.01	1.26	0.63		0.0773	0.0846	0.8719	0.2631	0.3646	0.6211	0.8707	0.4703	0.6326	0.577	0.7741	0.4148	0.0499	0.1139	0.4218	0.3573	0.5223	0.3248	0.9011	0.8419
	1714			hexadecenedioate (C16:1-DC)*	LC/MS neg	61862								0.4	0.82	0.43	1.51	0.5	2.01	1.07	3.73	1.25	0.53	1.85	0.62	3.49	1.17	0.33		0.1636	0.1164	0.0204	0.0149	0.5266	0.6261	0.4096	0.2933	0.9486	0.6673	0.3355	0.2376	0.0627	0.1162	0.6882	0.4609	0.3746	0.2668	0.8879	0.8419
	1715			heptadecanedioate (C17-DC)	LC/MS neg	62869			3083765					0.52	0.8	0.6	1.33	0.58	1.53	1.15	2.53	1.11	0.75	1.65	0.72	2.2	0.96	0.44		0.2815	0.1561	0.0334	0.0221	0.2782	0.6099	0.1938	0.1896	0.3642	0.4921	0.3137	0.2262	0.1881	0.1866	0.2951	0.2965	0.6879	0.3752	0.7642	0.8407
	1716			octadecanedioate (C18-DC)	LC/MS neg	36754		HMDB0000782	70095					0.79	1	0.88	0.86	0.77	1.27	1.11	1.09	0.98	0.88	0.86	0.77	0.98	0.88	0.9		0.647	0.2615	0.119	0.0579	0.9491	0.7039	0.4095	0.2933	0.9859	0.6763	0.4474	0.2866	0.6998	0.3594	0.1251	0.1701	0.4195	0.2855	0.9475	0.8541
	1717			octadecenedioate (C18:1-DC)	LC/MS neg	61861			9543674					0.44	0.74	0.52	1.4	0.6	1.7	1.2	3.19	1.36	0.7	1.87	0.8	2.67	1.14	0.43		0.132	0.1078	0.2096	0.0889	0.2446	0.6099	0.3835	0.2845	0.2966	0.4489	0.6059	0.3533	0.1298	0.1536	0.7519	0.4852	0.8606	0.4285	0.7196	0.8407
	1718			octadecadienedioate (C18:2-DC)*	LC/MS neg	61860								0.16	0.84	0.34	1.65	0.38	5.32	2.16	10.51	2.45	0.41	1.97	0.46	4.86	1.13	0.23		0.03	0.0614	0.0003	0.0005	0.0866	0.6099	0.0015	0.0086	0.0686	0.2747	0.0261	0.0484	0.2163	0.1993	0.0913	0.1449	0.1257	0.1411	0.2683	0.7483
	1719			nonadecanedioate (C19-DC)	LC/MS neg	62867			12572015					3.34	0.77	3.07	1.63	3.65	0.23	0.92	0.49	1.09	4	2.13	4.76	0.53	1.19	2.23		0.1162	0.1018	4.9982e-05	0.0001	0.3127	0.6131	0.0043	0.0168	0.1958	0.3717	0.0354	0.0587	0.2474	0.2135	0.0136	0.0435	0.0001	0.0011	0.3929	0.7971
	1720			eicosanedioate (C20-DC)	LC/MS neg	39831			75502					1.39	0.94	1.43	1.16	1.17	0.67	1.03	0.83	0.84	1.53	1.24	1.25	0.81	0.82	1.01		0.8312	0.3092	0.0169	0.0128	0.177	0.6099	0.0452	0.0725	0.5768	0.5525	0.0796	0.095	0.3365	0.2445	0.3882	0.3435	0.0122	0.0342	0.7883	0.8407
	1721			eicosenedioate (C20:1-DC)*	LC/MS neg	62923								0.64	0.95	0.65	1.78	0.75	1.47	1.01	2.75	1.16	0.69	1.88	0.79	2.74	1.15	0.42		0.1009	0.0928	0.2688	0.108	0.2896	0.6099	0.844	0.4631	0.5979	0.5615	0.7341	0.3992	0.0506	0.1139	0.9322	0.5332	0.7404	0.3888	0.8862	0.8419
	1722			docosadioate (C22-DC)	LC/MS neg	39837	C14240		7641					0.97	0.86	0.79	1.36	0.74	0.89	0.82	1.41	0.76	0.92	1.58	0.86	1.72	0.93	0.54		0.5235	0.2275	0.1675	0.0747	0.3523	0.6211	0.9499	0.4939	0.6254	0.5751	0.3059	0.2221	0.4612	0.2891	0.2333	0.2556	0.5819	0.3412	0.2778	0.7483
	1727			2-hydroxysebacate	LC/MS neg	63357		HMDB0000424	128458					0.33	0.58	0.63	0.88	0.27	1.76	1.9	2.68	0.82	1.08	1.52	0.47	1.41	0.43	0.31		0.3988	0.1958	0.0522	0.0308	0.5647	0.6275	0.0557	0.0853	0.1664	0.3647	0.0679	0.0865	0.1639	0.1731	0.0192	0.0535	0.5757	0.3405	0.9248	0.8477
	1753		Fatty Acid, Amide	heptadecenamide (17:1)*	LC/MS pos late	62443			71343948					0.93	0.21	0.24	0.78	1.57	0.23	0.26	0.84	1.69	1.13	3.65	7.38	3.24	6.55	2.02		0.043	0.07	0.1881	0.0822	0.3468	0.6211	0.9663	0.4974	0.05	0.2389	0.1154	0.1174	0.1395	0.1591	0.6624	0.4517	0.0547	0.0827	0.1249	0.6579
	1760			myristoleamide (14:1)*	LC/MS neg	62439								2.26	0.14	0.13	1.07	3.91	0.06	0.06	0.47	1.73	0.93	7.85	28.76	8.43	30.88	3.66		0.2325	0.1416	0.5034	0.1746	0.7119	0.6492	0.8457	0.4631	0.5245	0.5383	0.4783	0.2958	0.9894	0.4387	0.2954	0.2965	0.4071	0.2815	0.3676	0.7908
	1761			nonadecenamide (19:1)*	LC/MS pos late	62444								1.12	0.34	0.39	0.68	1.6	0.3	0.35	0.61	1.42	1.17	2.03	4.76	1.73	4.06	2.35		0.0696	0.0825	0.0965	0.049	0.2376	0.6099	0.9241	0.4876	0.068	0.2741	0.1695	0.1492	0.0694	0.1162	0.6139	0.4372	0.0557	0.0834	0.1429	0.6706
	1762			oleamide	LC/MS neg	32458	C19670	HMDB0002117	5283387					1.22	0.61	0.82	0.4	1.05	0.5	0.67	0.33	0.86	1.34	0.65	1.72	0.49	1.28	2.64		0.1816	0.1223	0.2563	0.1037	0.1524	0.6099	0.8022	0.4492	0.4531	0.5096	0.2202	0.1748	0.0361	0.1033	0.9541	0.5394	0.3188	0.2453	0.1423	0.6706
	1763			palmitamide (16:0)	LC/MS neg	42095		HMDB0012273	69421					1.33	0.57	0.79	0.38	1.14	0.43	0.59	0.28	0.85	1.38	0.66	1.99	0.48	1.44	3.01		0.1149	0.1013	0.1448	0.0673	0.1366	0.6099	0.7172	0.421	0.3163	0.4631	0.204	0.1682	0.0243	0.0975	0.8876	0.5205	0.1757	0.1706	0.1058	0.6317
	1764			palmitoleamide (16:1)*	LC/MS pos late	62438								1.02	0.3	0.36	0.71	1.6	0.29	0.35	0.69	1.57	1.2	2.38	5.38	1.99	4.5	2.27		0.0414	0.0695	0.1182	0.0577	0.3064	0.6099	0.9784	0.5003	0.0425	0.2264	0.1377	0.1298	0.11	0.1435	0.6055	0.4324	0.04	0.0694	0.131	0.6633
	1768		Fatty Acid, Amino	2-aminoheptanoate	LC/MS pos early	43761		HMDB0094649	227939					0.03	0.7	0.49	1.01	0.03	23.83	16.76	34.08	1.01	0.7	1.43	0.04	2.03	0.06	0.03		0.6264	0.2564	2.621e-07	1.6056e-06	0.3458	0.6211	3.6612e-05	0.0006	0.1356	0.3453	0.0002	0.0024	0.2337	0.2065	2.5234e-05	0.0006	0.003	0.0131	0.576	0.8156
	1773			2-aminooctanoate	LC/MS pos late	43343		HMDB0000991	69522					0.4	0.76	0.79	0.94	0.41	1.89	1.95	2.35	1.01	1.03	1.24	0.54	1.2	0.52	0.43		0.9137	0.3287	0.009	0.0079	0.2667	0.6099	0.0183	0.0392	0.2976	0.4489	0.1948	0.1626	0.6585	0.3458	0.0174	0.0501	0.166	0.1651	0.2578	0.7483
	1774			N-acetyl-2-aminooctanoate*	LC/MS neg	62059		HMDB0059745	95555					0.46	0.67	0.72	0.92	0.46	1.45	1.57	2	0.99	1.08	1.38	0.68	1.28	0.63	0.49		0.7395	0.2854	0.0577	0.0333	0.5157	0.6261	0.0873	0.113	0.2236	0.3975	0.1584	0.1417	0.5169	0.3076	0.0437	0.0899	0.6066	0.349	0.7526	0.8407
	1786		Fatty Acid Metabolism (also BCAA Metabolism)	butyrylcarnitine (C4)	LC/MS pos early	32412	C02862	HMDB0002013	439829					1.18	1.28	1.33	1.8	1.54	1.08	1.12	1.52	1.3	1.04	1.41	1.21	1.36	1.16	0.86		0.0576	0.0767	0.9538	0.2805	0.5507	0.6261	0.4071	0.2931	0.328	0.4706	0.3387	0.2386	0.017	0.0882	0.0826	0.1327	0.8794	0.4337	0.8967	0.8419
	1787			butyrylglycine	LC/MS neg	31850		HMDB0000808	88412					1.1	1.39	1.2	1.2	1.48	1.27	1.1	1.09	1.35	0.87	0.86	1.07	0.99	1.23	1.24		0.3127	0.167	0.4672	0.1671	0.5637	0.6275	0.5461	0.351	0.1752	0.3647	0.3392	0.2386	0.4422	0.2824	0.0718	0.1213	0.4442	0.294	0.7215	0.8407
	1789			propionylcarnitine (C3)	LC/MS pos early	32452	C03017	HMDB0000824	107738					1.57	0.92	1.49	1.73	1.65	0.58	0.95	1.1	1.05	1.62	1.89	1.81	1.16	1.11	0.95		0.1321	0.1078	0.0732	0.0402	0.4229	0.6261	0.0724	0.0991	0.7594	0.6109	0.3187	0.2291	0.0816	0.1247	0.0775	0.127	0.0375	0.0657	0.4064	0.7971
	1790			propionylglycine	LC/MS neg	31932		HMDB0000783	98681					1.24	0.76	1.09	0.78	1.31	0.61	0.88	0.63	1.06	1.43	1.03	1.72	0.72	1.21	1.68		0.4735	0.2181	0.0095	0.0082	0.6933	0.6483	0.2285	0.2105	0.3876	0.4921	0.7183	0.3938	0.3851	0.2636	0.1683	0.2103	0.0428	0.0716	0.3946	0.7971
	1792			methylmalonate (MMA)	LC/MS polar	1496	C02170	HMDB0000202	487					1.15	0.83	0.81	0.8	1.13	0.73	0.71	0.7	0.98	0.97	0.96	1.35	0.99	1.38	1.4		0.0075	0.0423	0.0226	0.0162	0.1175	0.6099	0.2431	0.2194	0.0863	0.3086	0.0814	0.0962	0.041	0.1049	0.4013	0.3483	0.0056	0.02	0.0051	0.2904
	1819		Fatty Acid Metabolism (Acyl Glycine)	isocaproylglycine	LC/MS neg	61789			28777652					0.85	0.93	0.83	0.78	0.84	1.09	0.97	0.91	0.98	0.89	0.83	0.9	0.94	1.02	1.08		0.468	0.2165	0.5153	0.1778	0.75	0.6541	0.5559	0.3554	0.7516	0.6088	0.2804	0.2087	0.2039	0.1937	0.296	0.2965	0.7845	0.401	0.6191	0.8166
	1821			valerylglycine	LC/MS neg	36768		HMDB0000927	4737557					1.08	1.09	1.23	0.77	1.05	1.01	1.14	0.71	0.97	1.13	0.7	0.96	0.62	0.85	1.37		0.1898	0.1246	0.0865	0.0453	0.5429	0.6261	0.7613	0.4374	0.8522	0.6403	0.2921	0.2157	0.1167	0.1478	0.7985	0.4945	0.9064	0.4383	0.4504	0.7971
	1823			hexanoylglycine	LC/MS neg	35436		HMDB0000701	99463					1.86	1.73	1.78	1.53	1.89	0.93	0.95	0.82	1.02	1.03	0.89	1.1	0.86	1.07	1.24		0.3645	0.1847	0.0953	0.0485	0.1879	0.6099	0.0255	0.0486	0.0315	0.2011	0.0627	0.082	0.1337	0.1566	0.0176	0.0502	0.927	0.4417	0.6849	0.8388
	1827			4-methylhexanoylglycine	LC/MS neg	62736								1.6	1.13	1.43	1.05	1.49	0.71	0.89	0.66	0.94	1.27	0.93	1.32	0.74	1.05	1.42		0.8946	0.3242	0.0153	0.0119	0.5552	0.6261	0.0478	0.0748	0.5634	0.5505	0.2477	0.1893	0.8467	0.4016	0.1237	0.1694	0.1515	0.1557	0.3882	0.7971
	1829			trans-2-hexenoylglycine	LC/MS neg	61798								1.4	1.33	1.3	1.65	1.67	0.95	0.93	1.18	1.19	0.98	1.24	1.25	1.27	1.28	1.01		0.0695	0.0825	0.4277	0.1559	0.4327	0.6261	0.1365	0.1519	0.0915	0.3086	0.1314	0.1267	0.0203	0.0892	0.0178	0.0504	0.8341	0.4197	0.9835	0.861
	1830			heptanoyl glycine	LC/MS neg	42629		HMDB0013010	10932172					1.4	0.82	1.23	0.89	1.3	0.59	0.88	0.64	0.93	1.49	1.08	1.58	0.72	1.06	1.46		0.4457	0.21	0.016	0.0122	0.9999	0.7123	0.1504	0.1597	0.3734	0.4921	0.5827	0.3423	0.6309	0.3379	0.3393	0.3176	0.0232	0.0473	0.3663	0.7908
	1832			cis-3,4-methyleneheptanoylglycine	LC/MS neg	64386								0.68	1.22	0.6	1.01	0.71	1.8	0.88	1.49	1.05	0.49	0.83	0.58	1.7	1.19	0.7		0.9464	0.3366	0.1602	0.0724	0.5601	0.6261	0.4544	0.3114	0.7487	0.6088	0.1999	0.1655	0.5764	0.3221	0.512	0.3974	0.2877	0.2315	0.586	0.8156
	1833			trans-3,4-methyleneheptanoylglycine	LC/MS pos early	55012			129822188					0.65	1.17	0.57	0.99	0.7	1.8	0.88	1.53	1.08	0.49	0.85	0.6	1.75	1.23	0.71		0.9481	0.3368	0.0843	0.0446	0.6072	0.6418	0.2916	0.243	0.9252	0.6595	0.1145	0.1172	0.5909	0.3269	0.4096	0.35	0.2517	0.2134	0.5875	0.8156
	1835			N-octanoylglycine	LC/MS neg	43502		HMDB0000832	84290					1.88	1.54	1.52	2.37	1.83	0.82	0.81	1.26	0.97	0.99	1.54	1.19	1.56	1.2	0.77		0.3941	0.1941	0.6157	0.2042	0.1457	0.6099	0.0613	0.0903	0.1301	0.3416	0.2571	0.1954	0.0296	0.1002	0.1166	0.1637	0.7041	0.3778	0.4404	0.7971
	1836			3-hydroxyoctanoylglycine	LC/MS neg	64388								2.5	1.58	1.83	2.12	2.48	0.63	0.73	0.85	0.99	1.16	1.35	1.57	1.16	1.36	1.17		0.3156	0.167	0.0477	0.029	0.2043	0.6099	0.0121	0.0299	0.182	0.3647	0.1274	0.1249	0.0561	0.1139	0.011	0.0384	0.2083	0.1897	0.2866	0.7483
	1841			N-palmitoylglycine	LC/MS neg	42092		HMDB0013034	151008					0.69	0.84	0.76	1.32	0.69	1.22	1.1	1.91	0.99	0.9	1.57	0.81	1.74	0.9	0.52		0.3179	0.1673	0.0053	0.0052	0.2304	0.6099	0.1165	0.1362	0.7024	0.5969	0.365	0.2503	0.0969	0.134	0.2037	0.2385	0.2292	0.2039	0.494	0.8015
	1846			2-butenoylglycine	LC/MS neg	61785			6303498					1.22	0.88	1.23	1.71	2.04	0.72	1.01	1.4	1.67	1.4	1.93	2.31	1.38	1.66	1.2		0.0271	0.059	0.0951	0.0485	0.8594	0.6818	0.215	0.2022	0.8531	0.6403	0.1851	0.1575	0.0379	0.1046	0.0105	0.0374	0.2893	0.2319	0.9297	0.8477
	1849			3-hydroxybutyroylglycine**	LC/MS pos early	62064								1.25	1	1.01	1.31	1.41	0.8	0.8	1.05	1.13	1.01	1.32	1.42	1.3	1.4	1.08		0.6776	0.2677	0.9758	0.2845	0.8699	0.6834	0.669	0.4041	0.6821	0.5904	0.9089	0.4566	0.4167	0.2749	0.4634	0.3761	0.9857	0.4588	0.754	0.8407
	1855			picolinoylglycine	LC/MS neg	63057		HMDB0059766	11788622					0.62	1.1	0.78	0.82	0.85	1.76	1.25	1.32	1.36	0.71	0.75	0.77	1.06	1.09	1.03		0.7724	0.2944	0.0776	0.0416	0.5152	0.6261	0.0791	0.1048	0.9114	0.6574	0.2999	0.2205	0.4111	0.273	0.3206	0.3073	0.0629	0.0888	0.4551	0.7971
	1858		Fatty Acid Metabolism (Acyl Carnitine, Short Chain)	acetylcarnitine (C2)	LC/MS pos early	32198	C02571	HMDB0000201	7045767					1.54	1.22	1.5	1.52	1.6	0.79	0.97	0.98	1.04	1.23	1.25	1.31	1.01	1.07	1.05		0.4224	0.204	0.0221	0.0159	0.4961	0.6261	0.0254	0.0486	0.3913	0.4921	0.0574	0.0776	0.0944	0.1326	0.0201	0.0552	0.1518	0.1557	0.7146	0.8407
	1862		Fatty Acid Metabolism (Acyl Carnitine, Medium Chain)	hexanoylcarnitine (C6)	LC/MS pos early	32328		HMDB0000756	6426853					1.85	1.32	1.66	2.55	2.21	0.72	0.9	1.38	1.2	1.26	1.93	1.67	1.53	1.33	0.87		0.0097	0.0443	0.1045	0.0521	0.1003	0.6099	0.0114	0.0292	0.213	0.3888	0.0658	0.0848	0.0008	0.0458	0.0026	0.014	0.1702	0.1685	0.4465	0.7971
	1870			octanoylcarnitine (C8)	LC/MS pos late	33936	C02838	HMDB0000791	11953814;123701					1.72	1.07	2.18	3.56	2.25	0.62	1.26	2.06	1.31	2.04	3.34	2.11	1.63	1.03	0.63		0.0021	0.0299	0.0474	0.0289	0.0385	0.6099	0.0331	0.058	0.7366	0.6083	0.0112	0.0287	0.0002	0.0205	0.0034	0.0163	0.0687	0.0926	0.6492	0.8257
	1874			cis-3,4-methyleneheptanoylcarnitine	LC/MS pos late	64389								0.86	1.07	0.79	1.67	1.08	1.25	0.92	1.94	1.26	0.74	1.55	1.01	2.1	1.36	0.65		0.0307	0.062	0.02	0.0147	0.6459	0.6447	0.5278	0.3457	0.6587	0.5873	0.1866	0.1584	0.0341	0.1026	0.6801	0.4582	0.286	0.2306	0.483	0.7971
	1878			decanoylcarnitine (C10)	LC/MS pos late	33941		HMDB0000651	10245190					1.63	0.98	1.55	2.12	1.84	0.6	0.95	1.3	1.13	1.59	2.17	1.88	1.37	1.19	0.87		0.0803	0.085	0.0636	0.036	0.2095	0.6099	0.0353	0.0613	0.8445	0.6392	0.1118	0.1168	0.0144	0.0813	0.0295	0.0696	0.0543	0.0823	0.581	0.8156
	1879			laurylcarnitine (C12)	LC/MS pos late	34534		HMDB000225	168381					2.08	1.15	2.01	1.69	2.4	0.55	0.97	0.81	1.15	1.74	1.47	2.08	0.84	1.19	1.42		0.1405	0.1098	7.4e-05	0.0002	0.5699	0.6289	0.0016	0.0093	0.5268	0.5383	0.0041	0.0162	0.047	0.1137	0.0003	0.0036	0.0089	0.0269	0.7325	0.8407
	1880		Fatty Acid Metabolism (Acyl Carnitine, Long Chain Saturated)	myristoylcarnitine (C14)	LC/MS pos late	33952		HMDB0005066	6426854					1.6	1.18	1.58	1.33	1.77	0.74	0.99	0.83	1.11	1.34	1.13	1.5	0.84	1.13	1.33		0.2426	0.1438	0.0005	0.0008	0.5059	0.6261	0.0032	0.0142	0.2274	0.3975	0.0065	0.0208	0.0657	0.1162	0.0008	0.006	0.0616	0.0874	0.791	0.8407
	1881			pentadecanoylcarnitine (C15)*	LC/MS pos late	57522		HMDB0062517	123132011					1.56	0.97	1.56	1.3	1.79	0.62	1	0.84	1.15	1.61	1.34	1.85	0.84	1.15	1.38		0.0802	0.085	2.9776e-05	8.2096e-05	0.7363	0.651	0.0029	0.0132	0.9122	0.6574	0.0042	0.0162	0.0589	0.1147	0.0002	0.0029	0.0039	0.016	0.8968	0.8419
	1882			palmitoylcarnitine (C16)	LC/MS pos late	44681	C02990	HMDB0000222	461					1.64	1.2	1.62	1.31	1.68	0.73	0.98	0.8	1.02	1.35	1.1	1.4	0.81	1.04	1.28		0.2873	0.158	2.061e-05	5.8656e-05	0.2264	0.6099	0.0001	0.0016	0.1145	0.3301	0.0003	0.0034	0.0273	0.0992	0.0002	0.0022	0.0127	0.0352	0.7784	0.8407
	1883			margaroylcarnitine (C17)*	LC/MS pos late	57512		HMDB0006210	53477803					2.23	0.97	2.09	1.44	2.26	0.44	0.94	0.64	1.01	2.15	1.48	2.32	0.69	1.08	1.57		0.0802	0.085	2.0305e-08	2.1497e-07	0.2976	0.6099	1.1429e-05	0.0003	0.9052	0.6565	0.0001	0.0019	0.0319	0.1002	9.9707e-06	0.0003	7.9129e-06	0.0002	0.429	0.7971
	1884			stearoylcarnitine (C18)	LC/MS pos late	34409		HMDB0000848	3006797					3.56	1.17	3.25	1.16	3.27	0.33	0.91	0.33	0.92	2.78	1	2.81	0.36	1.01	2.81		0.993	0.3466	2.44e-13	2.1531e-11	0.3777	0.6231	7.5948e-09	3.4909e-06	0.3656	0.4921	2.0107e-07	2.9193e-05	0.6548	0.3455	3.7076e-08	7.2617e-06	1.2046e-07	8.4664e-06	0.2856	0.7483
	1885			arachidoylcarnitine (C20)*	LC/MS pos late	57513		HMDB0006460	53477833					4.34	0.83	3.35	0.87	3.54	0.19	0.77	0.2	0.82	4.03	1.04	4.26	0.26	1.06	4.09		0.1443	0.1106	1.566e-12	8.2899e-11	0.5554	0.6261	5.3551e-08	7.5324e-06	0.522	0.5383	4.4094e-05	0.001	0.6309	0.3379	2.3078e-06	0.0001	7.6702e-09	1.6173e-06	0.0349	0.4746
	1886			behenoylcarnitine (C22)*	LC/MS pos late	57514		HMDB0062468	71464577					5.99	1.15	4.46	1.15	5.32	0.19	0.74	0.19	0.89	3.86	1	4.61	0.26	1.19	4.63		0.8081	0.3024	1.6235e-10	3.9065e-09	0.4166	0.6261	5.0856e-07	3.2197e-05	0.6374	0.579	3.7361e-05	0.0009	0.7202	0.3659	6.0211e-06	0.0002	2.1964e-06	6.616e-05	0.1698	0.6904
	1887			lignoceroylcarnitine (C24)*	LC/MS pos late	57515		HMDB0240665						3.43	0.91	2.69	0.96	3.03	0.26	0.78	0.28	0.88	2.96	1.05	3.34	0.36	1.13	3.17		0.4813	0.2197	1.2091e-10	3.2003e-09	0.7306	0.6501	2.1356e-06	8.1802e-05	0.7569	0.6096	0.0002	0.0021	0.7822	0.3813	1.5062e-05	0.0004	8.1744e-07	2.8727e-05	0.1657	0.6879
	1898		Fatty Acid Metabolism (Acyl Carnitine, Monounsaturated)	cis-4-decenoylcarnitine (C10:1)	LC/MS pos late	38178		HMDB0013205	57357170					1.17	0.86	1.47	2.13	1.51	0.73	1.25	1.81	1.28	1.7	2.47	1.75	1.45	1.03	0.71		0.1098	0.0993	0.1497	0.069	0.2707	0.6099	0.2646	0.2303	0.9995	0.6772	0.073	0.0901	0.0306	0.1002	0.0769	0.1268	0.2648	0.2199	0.4801	0.7971
	1899			undecenoylcarnitine (C11:1)	LC/MS pos late	63613								2.38	1.14	2.84	2.26	3.31	0.48	1.19	0.95	1.39	2.49	1.99	2.91	0.8	1.17	1.46		0.0397	0.0685	5.0259e-05	0.0001	0.2349	0.6099	0.0045	0.017	0.7562	0.6096	0.0019	0.0091	0.0172	0.0882	0.0006	0.005	0.002	0.0092	0.752	0.8407
	1900			5-dodecenoylcarnitine (C12:1)	LC/MS pos late	61769		HMDB13326	91825571					2.94	1.15	3.02	1.98	3.67	0.39	1.03	0.67	1.25	2.62	1.72	3.18	0.66	1.22	1.86		0.0499	0.0738	9.2742e-08	6.8186e-07	0.4516	0.6261	2.7454e-05	0.0005	0.4028	0.4924	5.6657e-05	0.0012	0.0138	0.0796	2.3711e-06	0.0001	0.0003	0.0028	0.8122	0.8407
	1902			myristoleoylcarnitine (C14:1)*	LC/MS pos late	48182		HMDB0240588	129691961					1.63	1.15	1.6	1.51	1.89	0.7	0.98	0.93	1.16	1.4	1.32	1.65	0.95	1.18	1.25		0.1627	0.1164	0.0024	0.0028	0.5182	0.6261	0.0079	0.0244	0.2911	0.4435	0.0122	0.0301	0.0402	0.1049	0.0017	0.0103	0.0905	0.1137	0.8638	0.8419
	1903			palmitoleoylcarnitine (C16:1)*	LC/MS pos late	53223		HMDB0013207	71464547					0.95	1.13	1.09	1.28	1.08	1.19	1.14	1.35	1.14	0.96	1.13	0.95	1.18	0.99	0.84		0.1838	0.123	0.5334	0.1815	0.5314	0.6261	0.6959	0.4149	0.179	0.3647	0.2824	0.2093	0.0483	0.1139	0.4062	0.3495	0.3353	0.2514	0.4902	0.8004
	1904			oleoylcarnitine (C18:1)	LC/MS pos late	35160		HMDB0005065	6441392					1.51	1.18	1.62	1.25	1.7	0.78	1.07	0.83	1.12	1.36	1.06	1.43	0.77	1.05	1.36		0.1683	0.1186	0.0002	0.0003	0.6254	0.6447	0.0029	0.0131	0.1099	0.3259	0.0008	0.0057	0.0668	0.1162	0.0004	0.0041	0.1275	0.1411	0.6472	0.8257
	1905			eicosenoylcarnitine (C20:1)*	LC/MS pos late	57519								1.78	1.14	1.76	1.01	1.89	0.64	0.99	0.57	1.06	1.54	0.89	1.67	0.57	1.08	1.88		0.9504	0.3369	7.6669e-08	6.5461e-07	0.3732	0.6231	0.0003	0.003	0.4421	0.5051	0.0009	0.006	0.6974	0.3587	7.8914e-05	0.0012	0.003	0.0131	0.7317	0.8407
	1907			nervonoylcarnitine (C24:1)*	LC/MS pos late	57531		HMDB0006509						3.38	1.42	2.9	1.67	3.37	0.42	0.86	0.49	1	2.04	1.17	2.37	0.58	1.16	2.02		0.5126	0.2252	2.472e-09	3.2714e-08	0.2833	0.6099	1.1638e-06	5.3494e-05	0.1719	0.3647	1.2908e-05	0.0005	0.105	0.1401	1.2763e-06	9.1141e-05	8.2345e-05	0.001	0.4389	0.7971
	1909		Fatty Acid Metabolism (Acyl Carnitine, Polyunsaturated)	linoleoylcarnitine (C18:2)*	LC/MS pos late	46223		HMDB0006469	6450015					1.37	0.96	1.36	1.49	1.45	0.7	1	1.09	1.06	1.42	1.55	1.52	1.09	1.07	0.98		0.171	0.1202	0.0192	0.0143	0.3959	0.6261	0.0527	0.0813	0.9311	0.6618	0.07	0.0884	0.0558	0.1139	0.0295	0.0696	0.0437	0.072	0.8926	0.8419
	1910			linolenoylcarnitine (C18:3)*	LC/MS pos late	57511								1	0.85	0.96	1.48	1.02	0.85	0.95	1.48	1.02	1.12	1.74	1.2	1.55	1.07	0.69		0.0729	0.0845	0.4989	0.1735	0.1254	0.6099	0.8285	0.4588	0.4808	0.5187	0.978	0.4752	0.027	0.0992	0.8273	0.5005	0.3582	0.2607	0.8071	0.8407
	1911			dihomo-linoleoylcarnitine (C20:2)*	LC/MS pos late	57520								1.68	0.96	1.81	1.33	1.89	0.57	1.08	0.79	1.12	1.89	1.39	1.97	0.73	1.04	1.42		0.0429	0.07	9.3306e-09	1.029e-07	0.3263	0.6211	7.1266e-05	0.001	0.7745	0.6145	1.7311e-05	0.0005	0.0254	0.0992	3.7407e-06	0.0002	2.98e-05	0.0005	0.6433	0.8257
	1912			arachidonoylcarnitine (C20:4)	LC/MS pos late	57518		HMDB0006455	136212424					1.19	0.84	1.16	1.21	1.35	0.7	0.98	1.02	1.14	1.39	1.45	1.62	1.05	1.17	1.11		0.1604	0.1159	0.0531	0.0312	0.799	0.6689	0.239	0.2175	0.5321	0.5416	0.3354	0.2376	0.238	0.2097	0.0711	0.1213	0.0758	0.0998	0.8263	0.8409
	1913			dihomo-linolenoylcarnitine (C20:3n3 or 6)*	LC/MS pos late	57521								1.19	0.94	1.25	0.96	1.25	0.79	1.05	0.81	1.06	1.33	1.02	1.34	0.77	1	1.31		0.9584	0.3394	0.005	0.0049	0.7646	0.6585	0.263	0.2294	0.58	0.5525	0.1785	0.1536	0.5001	0.3008	0.16	0.2032	0.0986	0.1193	0.8155	0.8407
	1925		Fatty Acid Metabolism (Acyl Carnitine, Dicarboxylate)	adipoylcarnitine (C6-DC)	LC/MS pos early	52988		HMDB0061677	71296139					0.97	0.64	0.8	1.18	1.45	0.66	0.83	1.22	1.51	1.26	1.85	2.28	1.47	1.81	1.23		0.0082	0.044	0.0931	0.0479	0.9889	0.7119	0.3604	0.2765	0.4359	0.5048	0.8771	0.4453	0.1608	0.1718	0.0152	0.0471	0.0951	0.1169	0.446	0.7971
	1932			pimeloylcarnitine/3-methyladipoylcarnitine (C7-DC)	LC/MS pos early	53224								1.44	0.55	0.73	0.73	1.59	0.38	0.51	0.51	1.1	1.32	1.33	2.88	1.01	2.17	2.16		0.0102	0.0451	0.0748	0.0407	0.7976	0.6689	0.5852	0.369	0.0166	0.1763	0.175	0.1515	0.2658	0.2211	0.716	0.4703	0.0041	0.0163	0.061	0.5421
	1933			suberoylcarnitine (C8-DC)	LC/MS pos early	52990								1	0.65	0.91	1.14	1.1	0.65	0.91	1.14	1.11	1.39	1.75	1.69	1.26	1.22	0.97		0.0691	0.0825	0.1026	0.0513	0.5499	0.6261	0.1571	0.1632	0.6442	0.5833	0.3622	0.25	0.0728	0.1169	0.0634	0.1134	0.064	0.0891	0.6047	0.8166
	1935			octadecanedioylcarnitine (C18-DC)*	LC/MS pos late	61867								0.57	0.52	0.7	1.23	0.78	0.92	1.23	2.17	1.37	1.34	2.35	1.49	1.76	1.11	0.63		0.09	0.089	0.716	0.2293	0.306	0.6099	0.5634	0.3582	0.3005	0.4498	0.9858	0.4766	0.1414	0.1599	0.6776	0.4577	0.6431	0.3611	0.5754	0.8156
	1936			octadecenedioylcarnitine (C18:1-DC)*	LC/MS pos late	61865								0.53	0.65	0.64	1.04	0.63	1.23	1.21	1.97	1.2	0.98	1.6	0.97	1.63	0.99	0.61		0.608	0.2512	0.0787	0.0421	0.3711	0.6231	0.1133	0.1336	0.3062	0.4552	0.3651	0.2503	0.6063	0.332	0.2731	0.2827	0.5623	0.3366	0.485	0.7971
	1937		Fatty Acid Metabolism (Acyl Carnitine, Hydroxy)	(R)-3-hydroxybutyrylcarnitine	LC/MS pos early	43264		HMDB0013127	53481617					2.79	2.15	2.69	3.38	3.22	0.77	0.96	1.21	1.15	1.25	1.57	1.5	1.26	1.2	0.95		0.0776	0.0847	0.0999	0.0507	0.1857	0.6099	0.0174	0.0385	0.102	0.3137	0.045	0.0667	0.0068	0.0618	0.0062	0.0261	0.4197	0.2855	0.6787	0.8351
	1938			(S)-3-hydroxybutyrylcarnitine	LC/MS pos early	52984		HMDB0013127	71464477					1.88	1.09	1.8	1.9	2.05	0.58	0.96	1.01	1.09	1.66	1.75	1.89	1.06	1.14	1.08		0.1381	0.1094	0.0057	0.0055	0.3125	0.6131	0.0102	0.0275	0.7748	0.6145	0.04	0.0628	0.0298	0.1002	0.0082	0.0319	0.0205	0.0448	0.5646	0.8156
	1942			3-hydroxyoctanoylcarnitine (1)	LC/MS pos early	64393								1.42	0.71	1.35	1.33	1.84	0.5	0.95	0.94	1.3	1.9	1.87	2.59	0.99	1.37	1.38		0.267	0.1524	0.0045	0.0045	0.7487	0.6541	0.0964	0.1193	0.397	0.4922	0.1552	0.1404	0.3999	0.2682	0.0444	0.0906	0.0146	0.0381	0.7998	0.8407
	1943			3-hydroxyoctanoylcarnitine (2)	LC/MS pos early	64394								1.69	1.16	1.19	1.39	1.84	0.68	0.7	0.82	1.09	1.03	1.2	1.6	1.17	1.55	1.33		0.1889	0.1244	0.0208	0.0151	0.2607	0.6099	0.01	0.0272	0.5262	0.5383	0.2814	0.2092	0.1038	0.139	0.011	0.0384	0.0446	0.0726	0.1123	0.6373
	1945			3-hydroxydecanoylcarnitine	LC/MS pos late	63358		HMDB0061636	121454166					2.03	0.4	1.86	1.45	1.93	0.2	0.92	0.71	0.95	4.62	3.59	4.78	0.78	1.04	1.33		0.0372	0.0671	5.9641e-05	0.0001	0.1748	0.6099	0.0111	0.0285	0.0598	0.2592	0.0524	0.0738	0.217	0.1995	0.0171	0.0501	4.7301e-05	0.0007	0.5052	0.8015
	1946			3-hydroxypalmitoylcarnitine	LC/MS pos late	61839		HMDB0013336	126456228					2.13	1.21	2.05	1.17	2.19	0.57	0.96	0.55	1.03	1.7	0.97	1.82	0.57	1.07	1.87		0.8772	0.321	1.8488e-07	1.2234e-06	0.5474	0.6261	6.4442e-05	0.0009	0.3333	0.4761	0.0004	0.0034	0.4343	0.2805	7.8731e-05	0.0012	0.0011	0.0067	0.5638	0.8156
	1947			3-hydroxyoleoylcarnitine	LC/MS pos late	61840			129637446					1.6	1.23	1.75	1.27	1.85	0.77	1.1	0.79	1.15	1.43	1.03	1.5	0.72	1.05	1.46		0.1266	0.1064	3.3683e-05	8.9153e-05	0.6023	0.638	0.0011	0.007	0.0824	0.3002	0.0003	0.0029	0.0557	0.1139	0.0001	0.0015	0.0849	0.1089	0.6274	0.8241
	1949		Carnitine Metabolism	deoxycarnitine	LC/MS pos early	36747	C01181	HMDB0001161	22620					1.07	0.88	1.14	1.55	1.13	0.82	1.07	1.45	1.06	1.3	1.76	1.28	1.36	0.99	0.73		0.0678	0.0825	0.9526	0.2805	0.1925	0.6099	0.6678	0.4039	0.4906	0.5237	0.6867	0.3815	0.0348	0.1026	0.4513	0.3668	0.2663	0.2202	0.9793	0.8582
	1950			carnitine	LC/MS pos early	15500	C00487 C00308	HMDB0000062	288					1.42	1.37	1.18	1.24	1.33	0.96	0.83	0.87	0.94	0.86	0.91	0.97	1.05	1.13	1.08		0.895	0.3242	0.1909	0.0831	0.0766	0.6099	0.0179	0.0386	0.0754	0.2879	0.3268	0.2337	0.2221	0.2008	0.0646	0.1137	0.5195	0.3245	0.1456	0.6706
	1956		Ketone Bodies	3-hydroxybutyrate (BHBA)	LC/MS polar	542	C03197 C01089	HMDB0000011 HMDB0000357 HMDB0000442	441;94318;92135					1.31	0.91	1.62	1.71	1.56	0.7	1.24	1.31	1.2	1.77	1.87	1.72	1.06	0.97	0.91		0.2031	0.1305	0.1431	0.0667	0.1273	0.6099	0.1192	0.1377	0.7659	0.6129	0.0397	0.0627	0.0178	0.0882	0.1083	0.1588	0.2032	0.1867	0.5941	0.8158
	1961		Fatty Acid Metabolism (Acyl Choline)	palmitoylcholine	LC/MS pos late	52944		HMDB0240592	151731					0.79	0.62	0.71	0.42	0.72	0.79	0.89	0.53	0.91	1.13	0.68	1.16	0.6	1.02	1.71		0.1343	0.1082	0.2001	0.086	0.3646	0.6211	0.7837	0.4453	0.1947	0.3712	0.5894	0.3443	0.0182	0.0882	0.4802	0.3839	0.3031	0.2369	0.7902	0.8407
	1962			oleoylcholine	LC/MS pos late	53260		HMDB0240596	59040790					0.8	0.7	0.81	0.42	0.77	0.88	1.02	0.53	0.96	1.16	0.6	1.09	0.52	0.95	1.82		0.2696	0.1531	0.2303	0.0948	0.5395	0.6261	0.9744	0.4996	0.5267	0.5383	0.9715	0.4738	0.063	0.1162	0.7089	0.4675	0.5477	0.3319	0.9971	0.8658
	1966			linoleoylcholine*	LC/MS pos late	57463		HMDB0013213	53481656					1.06	0.48	0.83	0.35	0.91	0.45	0.78	0.33	0.85	1.71	0.72	1.88	0.42	1.1	2.6		0.0851	0.0877	0.0018	0.0022	0.4572	0.6261	0.2963	0.2449	0.0948	0.3086	0.8304	0.4329	0.0216	0.0924	0.6575	0.4511	0.0087	0.0269	0.4043	0.7971
	1968			stearoylcholine*	LC/MS pos late	57464		HMDB0240648	90111					1.23	0.6	1	0.33	1.09	0.49	0.81	0.27	0.89	1.65	0.55	1.8	0.33	1.09	3.28		0.2493	0.1457	0.0008	0.0011	0.4536	0.6261	0.1402	0.1534	0.4546	0.5096	0.3546	0.2456	0.0509	0.1139	0.266	0.279	0.0297	0.0566	0.5717	0.8156
	1969			docosahexaenoylcholine	LC/MS pos late	53263		HMDB0240647						0.9	0.52	0.65	0.27	0.81	0.57	0.72	0.3	0.9	1.26	0.52	1.57	0.41	1.25	3.02		0.1161	0.1018	0.0311	0.0206	0.425	0.6261	0.364	0.2765	0.5247	0.5383	0.9709	0.4738	0.0319	0.1002	0.8985	0.5216	0.1271	0.1411	0.3453	0.7908
	1970			arachidonoylcholine	LC/MS pos late	53261		HMDB0240583	122198216					1.1	0.65	0.86	0.41	0.99	0.59	0.78	0.37	0.9	1.32	0.63	1.52	0.48	1.15	2.41		0.1908	0.1248	0.0155	0.012	0.5573	0.6261	0.3384	0.2682	0.3948	0.4921	0.8319	0.4329	0.0534	0.1139	0.7225	0.4721	0.0753	0.0995	0.4543	0.7971
	1975		Fatty Acid, Monohydroxy	4-hydroxybutyrate (GHB)	LC/MS pos early	34585	C00989	HMDB0000710	10413					1.22	0.51	0.94	1.13	1.28	0.42	0.77	0.93	1.05	1.85	2.22	2.51	1.2	1.36	1.13		0.0012	0.0219	0.0096	0.0083	0.2673	0.6099	0.2534	0.2245	0.0025	0.0919	0.7333	0.3992	0.6682	0.3492	0.2741	0.283	9.057e-05	0.001	0.1413	0.6706
	1978			2-hydroxyoctanoate	LC/MS neg	22036		HMDB0002264	5312860;6995013;94180					0.48	0.88	0.64	1.13	0.54	1.85	1.34	2.38	1.14	0.72	1.29	0.61	1.78	0.85	0.48		0.9497	0.3369	0.0058	0.0055	0.494	0.6261	0.0358	0.0617	0.3641	0.4921	0.1109	0.1168	0.9818	0.4371	0.0372	0.0804	0.215	0.1938	0.5879	0.8156
	1980			2-hydroxydecanoate	LC/MS neg	42489		HMDB0094656	21488					0.79	1.12	0.89	1.88	1.2	1.42	1.13	2.38	1.52	0.79	1.68	1.07	2.11	1.35	0.64		0.1277	0.1067	0.519	0.1784	0.5893	0.6348	0.8725	0.4707	0.8458	0.6392	0.9767	0.4752	0.0814	0.1247	0.5518	0.4131	0.9728	0.4538	0.8496	0.8419
	1984			2-hydroxylaurate	LC/MS neg	52916			97783					0.9	1.01	0.95	1.24	0.87	1.12	1.05	1.38	0.97	0.94	1.24	0.87	1.31	0.92	0.7		0.5321	0.2291	0.4196	0.1542	0.4067	0.6261	0.8463	0.4631	0.6685	0.5878	0.6955	0.3839	0.1017	0.1374	0.9153	0.5289	0.8144	0.4118	0.8432	0.8419
	1986			2-hydroxypalmitate	LC/MS neg	35675		HMDB0031057	12575964;92836;11065598					1.01	0.9	0.9	1.07	0.88	0.89	0.89	1.06	0.87	1	1.2	0.98	1.2	0.98	0.82		0.5308	0.2291	0.5758	0.1927	0.3975	0.6261	0.6905	0.4127	0.5732	0.5525	0.6086	0.3534	0.4246	0.2769	0.5368	0.4084	0.3386	0.2525	0.3647	0.7908
	1988			2-hydroxyoleate	LC/MS neg	54920			9796304					1.31	0.96	1.07	1.44	1.1	0.73	0.81	1.1	0.84	1.11	1.49	1.14	1.35	1.03	0.77		0.2551	0.1477	0.4941	0.1723	0.1296	0.6099	0.0673	0.0953	0.7176	0.6018	0.4709	0.2938	0.031	0.1002	0.2416	0.2612	0.1367	0.1472	0.2544	0.7483
	1989			2-hydroxystearate	LC/MS neg	17945	C03045 C03042	HMDB0062549	69417;439885;439887					1.24	1.05	1.22	1.07	1.06	0.84	0.98	0.86	0.85	1.17	1.02	1.01	0.88	0.87	0.99		0.7582	0.2902	0.0662	0.0372	0.5273	0.6261	0.0709	0.0981	0.7203	0.6028	0.135	0.1279	0.7251	0.3669	0.5479	0.4125	0.1422	0.1514	0.7414	0.8407
	1991			2-hydroxyarachidate*	LC/MS neg	61700			5225199					3.76	1.16	2.24	2.01	3.04	0.31	0.59	0.53	0.81	1.94	1.74	2.63	0.9	1.36	1.51		0.0468	0.0724	1.3922e-06	6.9526e-06	0.0353	0.6099	3.0392e-06	9.313e-05	0.6764	0.5904	0.0054	0.0196	0.0157	0.0869	7.2969e-05	0.0011	1.107e-05	0.0002	0.0147	0.3744
	1992			2-hydroxybehenate	LC/MS neg	57663		HMDB0061660	193484					2.85	1.14	2.29	1.75	2.4	0.4	0.8	0.61	0.84	2.01	1.53	2.11	0.76	1.05	1.37		0.2161	0.1347	8.5198e-08	6.664e-07	0.0281	0.6099	7.7535e-07	3.9599e-05	0.4018	0.4924	7.9476e-05	0.0013	0.0069	0.0618	2.1739e-05	0.0005	1.0534e-05	0.0002	0.1387	0.6706
	1997			3-hydroxyhexanoate	LC/MS neg	53230		HMDB0061652 HMDB0010718	151492					1.06	0.56	0.76	1.05	1.07	0.53	0.71	0.99	1	1.36	1.88	1.91	1.38	1.41	1.02		0.0048	0.0379	0.175	0.0775	0.5883	0.6348	0.5287	0.3457	0.0213	0.1932	0.4247	0.2765	0.5231	0.309	0.4263	0.3586	0.0043	0.0168	0.1575	0.6863
	1998			3-hydroxyoctanoate	LC/MS neg	22001	C20793	HMDB0001954	26613					1.39	0.66	1.16	0.98	1.42	0.47	0.84	0.71	1.02	1.77	1.49	2.16	0.84	1.22	1.45		0.1427	0.1103	0.0019	0.0023	0.6842	0.6464	0.1116	0.1318	0.09	0.3086	0.3736	0.254	0.9465	0.4294	0.1215	0.1682	0.0018	0.0089	0.47	0.7971
	1999			3-hydroxysuberate	LC/MS polar	31936		HMDB0000325	22328017					1.69	0.83	1.24	1.07	1.39	0.49	0.73	0.64	0.82	1.48	1.29	1.67	0.87	1.12	1.29		0.1311	0.1077	9.1248e-05	0.0002	0.3623	0.6211	0.0008	0.0059	0.4318	0.5048	0.132	0.1267	0.6538	0.3455	0.0435	0.0899	8.0199e-05	0.001	0.0418	0.4827
	2000			3-hydroxydecanoate	LC/MS neg	22053		HMDB0002203	26612					1.04	0.58	0.96	0.6	1.18	0.56	0.92	0.57	1.13	1.66	1.03	2.04	0.62	1.23	1.97		0.1252	0.1064	0.0047	0.0047	0.2863	0.6099	0.6424	0.3927	0.0276	0.1935	0.8416	0.4359	0.0828	0.1256	0.3867	0.3434	0.0089	0.0269	0.5074	0.8015
	2003			3-hydroxylaurate	LC/MS neg	32457		HMDB0000387	94216					1.75	0.6	1.97	1.22	1.88	0.34	1.13	0.7	1.07	3.28	2.03	3.12	0.62	0.95	1.54		0.1968	0.1272	9.8798e-05	0.0002	0.2928	0.6099	0.0284	0.0513	0.1669	0.3647	0.0246	0.0467	0.3236	0.2417	0.0154	0.0474	0.0007	0.005	0.9501	0.8541
	2005			3-hydroxypalmitate	LC/MS neg	27503		HMDB0010734	15569776					1.16	1.71	1.56	1.73	1.2	1.47	1.34	1.49	1.04	0.91	1.01	0.7	1.11	0.77	0.69		0.0021	0.0299	0.2621	0.1059	0.0799	0.6099	0.3456	0.2729	0.0016	0.068	0.0079	0.0235	0.0011	0.0458	0.2336	0.2556	0.0194	0.0439	0.0718	0.5604
	2007			3-hydroxystearate	LC/MS neg	52938		HMDB10737	5282907					0.69	1.82	0.92	1.83	0.65	2.66	1.34	2.66	0.95	0.51	1	0.36	1.98	0.71	0.36		0.0086	0.0443	1.653e-07	1.1219e-06	0.0576	0.6099	0.0724	0.0991	0.0017	0.068	0.5339	0.3192	0.0029	0.0562	0.0389	0.0832	7.1762e-06	0.0002	0.2294	0.7205
	2008			3-hydroxyoleate*	LC/MS neg	61843								1.51	1.39	2.19	1.59	1.61	0.92	1.45	1.05	1.06	1.57	1.14	1.15	0.73	0.73	1.01		0.0845	0.0875	0.0479	0.029	0.2451	0.6099	0.0369	0.063	0.0752	0.2879	0.0018	0.0085	0.0203	0.0892	0.0299	0.0699	0.7392	0.3887	0.2336	0.7205
	2013			5-hydroxyhexanoate	LC/MS neg	31938		HMDB0000525 HMDB0000409	170748					1	0.45	0.55	0.85	0.83	0.45	0.55	0.85	0.83	1.23	1.89	1.85	1.54	1.5	0.98		0.0262	0.059	0.8702	0.2629	0.7298	0.6501	0.8883	0.4765	0.0273	0.1935	0.127	0.1248	0.8502	0.4016	0.6186	0.4374	0.0376	0.0657	0.1639	0.6879
	2019			8-hydroxyoctanoate	LC/MS neg	21239		HMDB0061914	69820					0.45	0.98	0.65	1.36	0.59	2.17	1.45	3.03	1.32	0.67	1.39	0.61	2.1	0.91	0.43		0.7872	0.2977	0.0249	0.0174	0.5234	0.6261	0.0281	0.0511	0.7211	0.6028	0.2399	0.1856	0.4422	0.2824	0.0959	0.1493	0.0618	0.0874	0.2818	0.7483
	2028			16-hydroxypalmitate	LC/MS neg	39609	C18218	HMDB0006294	10466					1.83	1.18	1.97	1.35	1.89	0.64	1.08	0.74	1.03	1.67	1.15	1.61	0.69	0.96	1.4		0.3702	0.1867	7.1341e-05	0.0002	0.3501	0.6211	0.0009	0.0063	0.2519	0.4111	0.0006	0.0044	0.0499	0.1139	0.0011	0.0073	0.0194	0.0439	0.8576	0.8419
	2032			13-HODE + 9-HODE	LC/MS neg	37752	C14767 C14762	HMDB0004667 HMDB0004670	5312830;1424;5282947;5282944;5282945					0.29	0.71	0.46	0.54	0.29	2.49	1.61	1.88	1.02	0.65	0.75	0.41	1.17	0.64	0.54		0.123	0.1054	0.0055	0.0053	0.2609	0.6099	0.0044	0.017	0.4352	0.5048	0.1269	0.1248	0.0594	0.1147	0.0024	0.0133	0.031	0.0575	0.1496	0.6706
	2047			hydroxy-undecanedioate (OH-C11:0-DC)*	LC/MS neg	63684								0.34	0.57	0.73	0.97	0.34	1.68	2.14	2.84	1	1.27	1.7	0.6	1.33	0.47	0.35		0.8968	0.3244	0.073	0.0402	0.4591	0.6261	0.0734	0.0999	0.3819	0.4921	0.3346	0.2376	0.5643	0.3207	0.0734	0.1224	0.3441	0.2541	0.3922	0.7971
	2048		Fatty Acid, Dihydroxy	12,13-DiHOME	LC/MS neg	38395	C14829	HMDB0004705	10236635					0.75	0.75	0.65	0.86	0.73	1	0.88	1.16	0.98	0.88	1.16	0.98	1.32	1.12	0.85		0.3604	0.1835	0.2015	0.0863	0.8947	0.69	0.4758	0.3212	0.2606	0.4209	0.1237	0.1233	0.6158	0.335	0.1171	0.164	0.6753	0.3737	0.3978	0.7971
	2049			9,10-DiHOME	LC/MS neg	38399	C14828	HMDB0004704	9966640					0.8	0.82	1.22	0.89	0.79	1.03	1.52	1.11	0.99	1.48	1.08	0.96	0.73	0.65	0.89		0.7891	0.2977	0.866	0.2624	0.3291	0.6211	0.5437	0.351	0.269	0.4246	0.9919	0.4774	0.7006	0.3594	0.2373	0.2579	0.6134	0.3519	0.5371	0.8081
	2051			2S,3R-dihydroxybutyrate	LC/MS polar	62950		HMDB0002453	10964471					2.01	1.03	1.52	1.47	1.95	0.51	0.76	0.73	0.97	1.48	1.43	1.89	0.97	1.28	1.32		0.1391	0.1094	9.3154e-05	0.0002	0.3656	0.6211	0.0007	0.0053	0.9944	0.6772	0.0619	0.0814	0.1685	0.1753	0.0017	0.0103	0.0007	0.0049	0.0826	0.5922
	2052			2R,3R-dihydroxybutyrate	LC/MS polar	63109		HMDB0000498	13120901					1.45	0.96	1.31	1	1.33	0.66	0.91	0.69	0.92	1.37	1.05	1.39	0.76	1.01	1.33		0.6215	0.2547	0.0003	0.0006	0.9597	0.7072	0.0167	0.0374	0.6333	0.577	0.1083	0.1152	0.742	0.3695	0.0695	0.1197	0.005	0.0184	0.3934	0.7971
	2055			3,4-dihydroxybutyrate	LC/MS polar	62952		HMDB0000337	150929					1.18	0.9	0.72	0.66	0.77	0.77	0.61	0.56	0.65	0.79	0.73	0.85	0.92	1.07	1.17		0.0056	0.0379	0.8015	0.2475	0.2952	0.6099	0.435	0.3034	0.5091	0.5342	0.0774	0.094	0.0215	0.0924	0.1177	0.1642	0.154	0.1572	0.0132	0.3557
	2084		Docosanoid	14-HDoHE/17-HDoHE	LC/MS neg	53034		HMDB0010213 HMDB0060044	11566378;6439179					0.74	0.36	0.98	0.19	0.92	0.48	1.33	0.26	1.25	2.75	0.53	2.57	0.19	0.94	4.84		0.0933	0.0899	0.0102	0.0088	0.2501	0.6099	0.8355	0.4615	0.0943	0.3086	0.4439	0.2851	0.0186	0.0884	0.6389	0.4431	0.0618	0.0874	0.5756	0.8156
	2098		Eicosanoid	thromboxane B2	LC/MS neg	17807	C05963	HMDB0003252	5283137					0.54	0.61	0.89	0.35	0.6	1.14	1.66	0.65	1.11	1.46	0.57	0.97	0.39	0.67	1.69		0.1557	0.1149	0.5266	0.1798	0.2894	0.6099	0.4368	0.3042	0.1752	0.3647	0.9247	0.4624	0.0629	0.1162	0.1415	0.1852	0.5546	0.3336	0.3838	0.7971
	2150			12-HEPE	LC/MS neg	46293		HMDB0010202	10041593					0.73	0.48	1.11	0.24	0.8	0.66	1.52	0.33	1.1	2.31	0.5	1.66	0.22	0.72	3.33		0.1383	0.1094	0.0304	0.0202	0.2027	0.6099	0.9932	0.5031	0.0783	0.2913	0.4404	0.2837	0.0451	0.1104	0.4447	0.3659	0.077	0.0998	0.4454	0.7971
	2153			5-HETE	LC/MS neg	37372	C04805	HMDB0011134	5280733					0.68	0.9	1.36	0.49	0.95	1.33	1.99	0.73	1.4	1.5	0.55	1.05	0.37	0.7	1.92		0.0555	0.0754	0.1854	0.0812	0.6005	0.638	0.9917	0.5031	0.3695	0.4921	0.0708	0.0888	0.3446	0.2468	0.6637	0.452	0.3641	0.2629	0.0693	0.5522
	2159			12-HETE	LC/MS neg	37536	C14777	HMDB0006111	5283155					0.64	0.46	0.8	0.23	0.84	0.73	1.26	0.36	1.31	1.72	0.49	1.8	0.29	1.05	3.67		0.0686	0.0825	0.0829	0.044	0.1885	0.6099	0.7234	0.4236	0.0356	0.2101	0.9261	0.4626	0.0187	0.0884	0.2042	0.2385	0.0761	0.0998	0.6553	0.8257
	2166			12-HHTrE	LC/MS neg	57393	C20388	HMDB0012535	5283141					0.53	0.63	0.62	0.41	0.38	1.19	1.17	0.79	0.72	0.98	0.66	0.6	0.67	0.61	0.91		0.0697	0.0825	0.7825	0.2428	0.4158	0.6261	0.4611	0.314	0.1061	0.3194	0.6126	0.3553	0.0428	0.1082	0.0509	0.0985	0.3676	0.2636	0.8162	0.8407
	2177		Endocannabinoid	oleoyl ethanolamide	LC/MS neg	38102		HMDB0002088	5283454					1.48	1.14	1.67	0.99	1.29	0.77	1.12	0.67	0.87	1.46	0.87	1.13	0.59	0.77	1.3		0.1405	0.1098	7.9252e-05	0.0002	0.8834	0.6846	0.0064	0.021	0.3831	0.4921	0.0013	0.0073	0.7322	0.3682	0.0725	0.1215	0.0517	0.0807	0.548	0.814
	2180			palmitoyl ethanolamide	LC/MS neg	38165	C16512	HMDB0002100	4671					1.43	0.99	1.4	0.92	1.23	0.69	0.98	0.64	0.86	1.42	0.94	1.25	0.66	0.88	1.33		0.2215	0.1365	6.2306e-06	2.2904e-05	0.9088	0.6924	0.0022	0.0113	0.8351	0.6366	0.0055	0.0196	0.373	0.2593	0.0802	0.1292	0.0013	0.007	0.7377	0.8407
	2181			stearoyl ethanolamide	LC/MS pos late	38625		HMDB0013078	27902					2.08	1.07	1.94	1.04	1.78	0.52	0.93	0.5	0.86	1.8	0.97	1.66	0.54	0.92	1.71		0.7884	0.2977	1.1051e-09	1.7668e-08	0.4157	0.6261	1.3066e-06	5.4596e-05	0.6005	0.5622	4.6775e-05	0.001	0.7576	0.3734	6.3899e-05	0.001	6.6388e-06	0.0002	0.2503	0.7483
	2190			N-oleoyltaurine	LC/MS neg	39732			6437033					1.15	0.85	1.04	1.03	1.07	0.74	0.91	0.89	0.93	1.23	1.21	1.26	0.98	1.02	1.04		0.5905	0.2459	0.0708	0.0393	0.7111	0.6492	0.1956	0.1903	0.4672	0.5133	0.4487	0.2866	0.6664	0.3492	0.4061	0.3495	0.0473	0.0759	0.5839	0.8156
	2191			N-stearoyltaurine	LC/MS neg	39730			168274					1.58	0.74	1.27	0.78	1.18	0.47	0.8	0.49	0.74	1.71	1.06	1.59	0.62	0.93	1.5		0.0009	0.0201	4.0256e-09	4.8432e-08	0.6132	0.6447	9.8592e-05	0.0012	0.0059	0.1293	0.03	0.0526	0.0318	0.1002	0.1307	0.1748	1.3234e-08	1.8603e-06	0.041	0.4827
	2192			N-palmitoyltaurine	LC/MS neg	39835			14504290					1	0.81	0.89	1.03	0.89	0.82	0.89	1.04	0.89	1.09	1.27	1.09	1.17	1	0.86		0.281	0.1561	0.855	0.2604	0.4468	0.6261	0.7439	0.4312	0.1766	0.3647	0.6225	0.3601	0.7401	0.3693	0.5804	0.4253	0.0963	0.1174	0.4144	0.7971
	2194			N-palmitoleoyltaurine*	LC/MS neg	61824								0.39	0.76	0.5	1.11	0.43	1.94	1.28	2.83	1.1	0.66	1.46	0.57	2.22	0.86	0.39		0.5784	0.2422	2.7725e-05	7.7245e-05	0.4883	0.6261	0.0072	0.0227	0.8662	0.6451	0.048	0.0694	0.2751	0.2242	0.0182	0.0511	0.011	0.0315	0.4265	0.7971
	2195			N-linoleoyltaurine*	LC/MS neg	61826			52922081					1.12	0.78	0.97	1.11	0.98	0.7	0.87	0.99	0.88	1.25	1.42	1.26	1.14	1.01	0.88		0.0272	0.059	0.2274	0.0943	0.0715	0.6099	0.2525	0.2243	0.0311	0.2011	0.9036	0.455	0.2826	0.2298	0.9475	0.538	0.0016	0.0085	0.207	0.7162
	2198			hexanoyltaurine	LC/MS neg	63224			2245940					0.95	0.87	1.36	0.79	0.99	0.91	1.43	0.83	1.04	1.57	0.91	1.14	0.58	0.73	1.25		0.691	0.2713	0.1465	0.0678	0.6716	0.6447	0.8296	0.4589	0.8126	0.628	0.2205	0.1748	0.5986	0.3295	0.7383	0.478	0.6514	0.3643	0.3099	0.7701
	2200			linoleoyl ethanolamide	LC/MS neg	52608		HMDB0012252	5283446					1.15	1.01	1.63	0.8	0.92	0.88	1.42	0.7	0.8	1.62	0.79	0.91	0.49	0.56	1.15		0.0785	0.085	0.0511	0.0303	0.669	0.6447	0.4335	0.3032	0.9615	0.6711	0.059	0.0788	0.3068	0.2389	0.8159	0.4989	0.4619	0.3015	0.2546	0.7483
	2214			N-oleoylserine	LC/MS neg	57664			44190514					0.86	0.84	0.68	1.05	0.84	0.97	0.79	1.21	0.97	0.81	1.25	1	1.53	1.23	0.8		0.2196	0.1365	0.18	0.0794	0.9354	0.7011	0.5413	0.351	0.3106	0.4596	0.099	0.1091	0.7623	0.3752	0.4394	0.3637	0.683	0.3745	0.2888	0.7483
	2215			N-stearoylserine*	LC/MS neg	61822								0.78	0.63	0.82	0.75	0.7	0.81	1.05	0.95	0.9	1.3	1.18	1.11	0.91	0.86	0.94		0.296	0.1611	0.745	0.2344	0.2181	0.6099	0.2119	0.2001	0.0316	0.2011	0.3047	0.222	0.1929	0.1881	0.0773	0.127	0.3408	0.2531	0.8195	0.8407
	2219		Inositol Metabolism	myo-inositol	LC/MS polar	1124	C00137	HMDB0000211	892					1.14	0.72	0.95	0.75	1.04	0.63	0.84	0.66	0.92	1.32	1.04	1.45	0.79	1.1	1.39		0.0138	0.0471	0.0009	0.0012	0.4332	0.6261	0.3092	0.2507	0.0056	0.1293	0.743	0.4025	0.0292	0.1002	0.705	0.4675	0.0003	0.0027	0.1817	0.7154
	2250		Phospholipid Metabolism	choline	LC/MS pos early	15506	C00114	HMDB0000097	305					0.94	0.84	0.98	0.75	1.01	0.89	1.04	0.8	1.08	1.17	0.9	1.21	0.77	1.03	1.35		0.2429	0.1438	0.0354	0.0231	0.0961	0.6099	0.6568	0.3983	0.0884	0.3086	0.8514	0.4373	0.009	0.0681	0.9292	0.5327	0.2008	0.1853	0.7968	0.8407
	2251			choline phosphate	LC/MS pos early	34396	C00588	HMDB0001565	1014					1.49	0.92	1.51	1.26	1.32	0.61	1.01	0.84	0.89	1.64	1.37	1.44	0.83	0.88	1.05		0.9014	0.3253	0.0029	0.0032	0.7829	0.6641	0.046	0.073	0.7021	0.5969	0.0787	0.0947	0.8383	0.3995	0.1466	0.1893	0.0192	0.0438	0.7989	0.8407
	2254			glycerophosphorylcholine (GPC)	LC/MS pos early	15990	C00670	HMDB0000086	71920					1.12	1.1	1.16	0.59	1.07	0.98	1.04	0.52	0.96	1.06	0.54	0.98	0.51	0.92	1.82		0.0371	0.0671	0.0053	0.0052	0.1542	0.6099	0.212	0.2001	0.3912	0.4921	0.1557	0.1404	0.0257	0.0992	0.3453	0.3202	0.6896	0.3752	0.8584	0.8419
	2256			phosphoethanolamine	LC/MS pos early	1600	C00346	HMDB0000224	1015					1.3	0.72	1.14	0.97	1.27	0.55	0.87	0.74	0.98	1.58	1.35	1.78	0.85	1.12	1.32		0.1044	0.0955	0.0031	0.0034	0.6518	0.6447	0.1779	0.1781	0.0403	0.2182	0.648	0.3656	0.5684	0.321	0.3417	0.3187	0.0013	0.007	0.3669	0.7908
	2258			glycerophosphoethanolamine	LC/MS pos early	37455	C01233	HMDB0000114	123874					1.15	1	1.33	1.07	1.16	0.87	1.15	0.93	1.01	1.32	1.07	1.16	0.81	0.88	1.08		0.7921	0.2983	0.0474	0.0289	0.9316	0.7011	0.2174	0.2035	0.7043	0.5969	0.0815	0.0962	0.7811	0.3813	0.2493	0.2655	0.3885	0.2721	0.5947	0.8158
	2259			glycerophosphoserine*	LC/MS pos early	57404			3081457					0.98	0.88	1.1	0.64	1.15	0.9	1.12	0.65	1.17	1.25	0.73	1.3	0.58	1.05	1.8		0.5985	0.2489	0.0192	0.0143	0.2303	0.6099	0.8021	0.4492	0.4298	0.5048	0.6338	0.3632	0.0592	0.1147	0.448	0.3659	0.3002	0.2366	0.821	0.8407
	2260			glycerophosphoinositol*	LC/MS pos early	52307			167572					1.09	0.75	0.87	0.56	1.05	0.69	0.8	0.52	0.97	1.16	0.75	1.41	0.65	1.21	1.87		0.0605	0.079	0.0157	0.0121	0.1829	0.6099	0.4826	0.3243	0.1746	0.3647	0.4842	0.2971	0.0094	0.0683	0.7966	0.4945	0.0433	0.0716	0.1653	0.6879
	2261			trimethylamine N-oxide	LC/MS pos early	40406	C01104	HMDB0000925	1145					0.44	1.19	0.41	0.7	0.64	2.7	0.94	1.6	1.45	0.35	0.59	0.54	1.7	1.54	0.91		0.8701	0.3195	0.0049	0.0048	0.1022	0.6099	0.0573	0.0869	0.3728	0.4921	0.0301	0.0526	0.5473	0.315	0.5035	0.3927	0.0069	0.0236	0.7701	0.8407
	2280		Phosphatidylcholine (PC)	1-myristoyl-2-palmitoyl-GPC (14:0/16:0)	LC/MS pos late	19258		HMDB0007869	129657					0.91	1.11	0.96	1.08	0.91	1.23	1.06	1.2	1	0.86	0.97	0.82	1.13	0.95	0.84		0.5473	0.2331	0.0249	0.0174	0.7676	0.6585	0.4048	0.293	0.3104	0.4596	0.7594	0.4084	0.3901	0.2647	0.3215	0.3073	0.0693	0.0931	0.5963	0.8166
	2284			1-myristoyl-2-arachidonoyl-GPC (14:0/20:4)*	LC/MS pos late	53195		HMDB0007883	24778634					1.19	1.39	1.3	0.81	0.99	1.17	1.09	0.68	0.83	0.93	0.58	0.71	0.62	0.77	1.23		0.0704	0.0828	0.215	0.0901	0.6475	0.6447	0.3208	0.2578	0.1834	0.3649	0.1925	0.1612	0.3474	0.2474	0.7998	0.4945	0.7285	0.386	0.7497	0.8407
	2289			1-pentadecanoyl-2-linoleoyl-GPC (15:0/18:2)*	LC/MS pos late	52497		HMDB0007940	24778664					1.51	0.76	1.39	0.61	1.23	0.51	0.92	0.41	0.82	1.82	0.8	1.61	0.44	0.88	2.01		0.1352	0.1084	4.3631e-05	0.0001	0.8371	0.6773	0.0249	0.0481	0.3973	0.4922	0.0979	0.1085	0.0707	0.1162	0.2039	0.2385	0.0029	0.0128	0.5252	0.8015
	2290			1-pentadecanoyl-2-arachidonoyl-GPC (15:0/20:4)*	LC/MS pos late	53194		HMDB0007949	52922330					1.5	0.83	1.33	0.83	1.29	0.56	0.89	0.55	0.86	1.6	0.99	1.55	0.62	0.97	1.56		0.1778	0.1213	1.5651e-05	4.9281e-05	0.9836	0.7119	0.0095	0.0268	0.2404	0.4034	0.0809	0.0962	0.1919	0.1876	0.123	0.1693	0.0004	0.003	0.3526	0.7908
	2291			1-pentadecanoyl-2-docosahexaenoyl-GPC (15:0/22:6)*	LC/MS pos late	53197		HMDB0007958	52922342					1.78	0.86	1.37	0.63	1.27	0.48	0.77	0.35	0.71	1.6	0.73	1.48	0.46	0.93	2.03		0.0942	0.0899	6.6624e-05	0.0001	0.7488	0.6541	0.0084	0.025	0.7315	0.6058	0.1078	0.1152	0.0965	0.134	0.1952	0.2324	0.0034	0.0143	0.2621	0.7483
	2296			1,2-dipalmitoyl-GPC (16:0/16:0)	LC/MS pos late	19130	D03585	HMDB0000564	452110					0.82	1	0.97	1.4	0.91	1.22	1.19	1.72	1.11	0.97	1.4	0.91	1.44	0.94	0.65		0.1731	0.1202	0.0145	0.0115	0.4258	0.6261	0.1906	0.188	0.9794	0.6763	0.5149	0.3102	0.0684	0.1162	0.5489	0.4126	0.1992	0.1853	0.5032	0.8015
	2297			1-palmitoyl-2-palmitoleoyl-GPC (16:0/16:1)*	LC/MS pos late	52470		HMDB0007969	6443788					0.7	1.57	0.96	0.82	0.65	2.25	1.37	1.18	0.94	0.61	0.52	0.42	0.86	0.68	0.8		0.0031	0.0334	0.0138	0.011	0.4967	0.6261	0.1258	0.1428	0.0484	0.2368	0.7979	0.4214	0.1797	0.1823	0.0549	0.1031	0.0009	0.0059	0.1988	0.7154
	2299			1-palmitoyl-2-stearoyl-GPC (16:0/18:0)	LC/MS pos late	52616	C03889	HMDB0007970	24778686					1.26	1.1	1.41	0.79	1.27	0.88	1.12	0.62	1	1.28	0.71	1.15	0.56	0.9	1.61		0.488	0.2202	0.0044	0.0045	0.6223	0.6447	0.1232	0.1408	0.5375	0.5419	0.0817	0.0962	0.3694	0.2579	0.1158	0.1637	0.3454	0.2547	0.8331	0.8419
	2301			1-palmitoyl-2-oleoyl-GPC (16:0/18:1)	LC/MS pos late	52461	C13875	HMDB0007972	6436017					1.02	1.23	1.08	0.75	0.95	1.21	1.07	0.74	0.93	0.88	0.61	0.77	0.69	0.87	1.27		0.0061	0.0406	0.3681	0.1394	0.1265	0.6099	0.7515	0.434	0.1415	0.3487	0.5109	0.3091	0.0232	0.0964	0.7875	0.4915	0.2441	0.2131	0.7321	0.8407
	2304			1-palmitoyl-2-linoleoyl-GPC (16:0/18:2)	LC/MS pos late	42446		HMDB0007973	5287971					1.15	1.09	1.12	0.87	1.06	0.95	0.98	0.76	0.92	1.03	0.8	0.97	0.77	0.94	1.22		0.097	0.0913	0.0126	0.0102	0.5047	0.6261	0.0919	0.1157	0.3877	0.4921	0.1503	0.1371	0.1603	0.1717	0.4349	0.3623	0.397	0.2762	0.795	0.8407
	2307			1-palmitoyl-2-gamma-linolenoyl-GPC (16:0/18:3n6)*	LC/MS pos late	54812		HMDB0007974	24778699					1.48	1.2	1.45	0.67	1.16	0.81	0.98	0.45	0.78	1.21	0.55	0.97	0.46	0.8	1.74		0.0752	0.0846	0.0023	0.0027	0.7153	0.6492	0.0404	0.0674	0.4612	0.511	0.0552	0.0763	0.178	0.182	0.3447	0.3202	0.1758	0.1706	0.8864	0.8419
	2311			1-palmitoyl-2-dihomo-linolenoyl-GPC (16:0/20:3n3 or 6)*	LC/MS pos late	52454								1.06	1.27	1.17	0.78	0.97	1.19	1.1	0.73	0.91	0.93	0.61	0.77	0.66	0.83	1.25		0.0094	0.0443	0.194	0.0839	0.3276	0.6211	0.5256	0.3456	0.1483	0.3528	0.2248	0.1774	0.0663	0.1162	0.9994	0.5487	0.4086	0.2818	0.5561	0.8156
	2315			1-palmitoyl-2-arachidonoyl-GPC (16:0/20:4n6)	LC/MS pos late	52462	C05208	HMDB0007982	10747814					1.16	1.16	1.15	0.88	1.07	1	0.99	0.76	0.93	0.99	0.76	0.92	0.76	0.93	1.22		0.05	0.0738	0.0362	0.0235	0.3543	0.6211	0.1242	0.1416	0.1667	0.3647	0.139	0.1308	0.1785	0.182	0.4751	0.3819	0.8716	0.4314	0.9515	0.8541
	2316			1-palmitoyl-2-eicosapentaenoyl-GPC (16:0/20:5)*	LC/MS pos late	52463		HMDB0007984	24778723					1.17	1.63	1.32	0.67	0.97	1.4	1.13	0.58	0.83	0.81	0.41	0.6	0.51	0.74	1.44		0.0506	0.0741	0.1422	0.0664	0.6724	0.6447	0.3105	0.2513	0.2538	0.4132	0.1929	0.1612	0.2196	0.2	0.8791	0.5176	0.8965	0.4374	0.7672	0.8407
	2321			1-palmitoyl-2-docosahexaenoyl-GPC (16:0/22:6)	LC/MS pos late	52610		HMDB0007991	6441886					1.18	1.16	1.12	0.8	1.06	0.98	0.95	0.68	0.9	0.97	0.69	0.91	0.71	0.94	1.32		0.0516	0.0741	0.0304	0.0202	0.2943	0.6099	0.1397	0.1534	0.3001	0.4498	0.2627	0.1987	0.0878	0.1297	0.5843	0.4258	0.649	0.3635	0.7116	0.8407
	2327			1-palmitoleoyl-2-linoleoyl-GPC (16:1/18:2)*	LC/MS pos late	52683		HMDB0008006	24778768					0.84	1.23	0.95	0.66	0.75	1.47	1.13	0.79	0.89	0.77	0.54	0.61	0.7	0.79	1.13		0.0513	0.0741	0.9038	0.2697	0.4892	0.6261	0.8181	0.4536	0.3945	0.4921	0.7886	0.4189	0.0919	0.1311	0.4899	0.3875	0.2814	0.2278	0.6189	0.8166
	2328			1-palmitoleoyl-2-linolenoyl-GPC (16:1/18:3)*	LC/MS pos late	53180		HMDB0008008	52922452					0.98	1.38	1.08	0.67	0.72	1.4	1.1	0.69	0.73	0.78	0.49	0.52	0.62	0.66	1.06		0.0549	0.075	0.4707	0.1676	0.7965	0.6689	0.5541	0.3547	0.3268	0.47	0.3882	0.2626	0.2333	0.2065	0.6727	0.4569	0.6937	0.3765	0.784	0.8407
	2334			1-margaroyl-2-oleoyl-GPC (17:0/18:1)*	LC/MS pos late	52499								1.77	0.99	1.96	0.62	1.52	0.56	1.11	0.35	0.86	1.98	0.63	1.54	0.32	0.78	2.45		0.0202	0.0517	7.958e-08	6.5823e-07	0.5129	0.6261	0.0024	0.0118	0.9137	0.6577	0.0008	0.0057	0.0196	0.0892	0.0234	0.0597	0.0033	0.0138	0.6934	0.8407
	2339			1,2-distearoyl-GPC (18:0/18:0)	LC/MS pos late	19132		HMDB0008036	94190					1.26	1.14	1.4	0.44	1.23	0.9	1.11	0.35	0.98	1.23	0.38	1.08	0.31	0.88	2.82		0.5164	0.2262	0.0412	0.026	0.229	0.6099	0.4139	0.2954	0.5147	0.5383	0.3805	0.2582	0.185	0.1853	0.2157	0.2463	0.8671	0.4307	0.9515	0.8541
	2340			1-stearoyl-2-oleoyl-GPC (18:0/18:1)	LC/MS pos late	52438		HMDB0008038	24778825					1.56	1.27	1.63	0.73	1.43	0.82	1.05	0.47	0.92	1.29	0.57	1.13	0.44	0.87	1.97		0.0286	0.0602	1.7726e-05	5.3314e-05	0.2227	0.6099	0.0106	0.0277	0.2268	0.3975	0.006	0.0204	0.056	0.1139	0.034	0.0755	0.1509	0.1555	0.825	0.8409
	2343			1-stearoyl-2-linoleoyl-GPC (18:0/18:2)*	LC/MS pos late	52452		HMDB0008039	6441487					1.47	1.05	1.33	0.94	1.39	0.71	0.91	0.64	0.95	1.27	0.89	1.32	0.7	1.04	1.48		0.6573	0.2637	2.6692e-07	1.6056e-06	0.3492	0.6211	0.0001	0.0016	0.6472	0.5838	0.0063	0.0208	0.524	0.3091	0.0009	0.007	0.0006	0.0043	0.1903	0.7154
	2346			phosphatidylcholine (18:0/20:2, 20:0/18:2)*	LC/MS pos late	53192		HMDB0008045 HMDB0008143						1.67	1.14	1.47	0.62	1.41	0.68	0.88	0.37	0.84	1.29	0.54	1.24	0.42	0.96	2.29		0.2536	0.1471	0.0001	0.0002	0.4026	0.6261	0.0115	0.0292	0.4775	0.5187	0.0379	0.0611	0.1961	0.1889	0.0502	0.0985	0.0594	0.0865	0.6138	0.8166
	2347			1-stearoyl-2-dihomo-linolenoyl-GPC (18:0/20:3n3 or 6)*	LC/MS pos late	52629		HMDB0008047						1.18	1.44	1.32	0.64	1.06	1.22	1.12	0.54	0.9	0.92	0.45	0.74	0.49	0.8	1.66		0.0191	0.0516	0.0273	0.0187	0.2529	0.6099	0.2409	0.2184	0.1724	0.3647	0.1187	0.1196	0.0662	0.1162	0.4942	0.3894	0.8429	0.4222	0.6871	0.8389
	2348			1-stearoyl-2-meadoyl-GPC (18:0/20:3n9)*	LC/MS pos late	52738		HMDB0008046	24778855					1.44	2.05	2.28	0.9	1.37	1.42	1.58	0.63	0.95	1.11	0.44	0.67	0.4	0.6	1.51		0.0106	0.0455	0.0202	0.0148	0.398	0.6261	0.1621	0.1671	0.0484	0.2368	0.0188	0.0385	0.2586	0.2173	0.2325	0.2556	0.5417	0.3311	0.3079	0.7701
	2351			1-stearoyl-2-arachidonoyl-GPC (18:0/20:4)	LC/MS pos late	42450		HMDB0008048	16219824					1.38	1.22	1.33	0.85	1.3	0.89	0.97	0.62	0.94	1.09	0.7	1.06	0.64	0.98	1.52		0.1484	0.1121	0.0005	0.0007	0.2088	0.6099	0.0138	0.0327	0.1447	0.3506	0.0281	0.0506	0.2534	0.2147	0.0415	0.0868	0.2793	0.2273	0.765	0.8407
	2357			1-stearoyl-2-docosahexaenoyl-GPC (18:0/22:6)	LC/MS pos late	52611		HMDB0008057	24778876					1.46	1.18	1.26	0.73	1.29	0.8	0.86	0.5	0.88	1.07	0.62	1.1	0.58	1.02	1.78		0.1555	0.1149	0.0006	0.0009	0.1855	0.6099	0.0175	0.0385	0.3585	0.4915	0.1124	0.1168	0.1191	0.1482	0.0986	0.1507	0.1274	0.1411	0.3935	0.7971
	2366			1-oleoyl-2-linoleoyl-GPC (18:1/18:2)*	LC/MS pos late	52453		HMDB0008105	24778939					1.09	1.14	1	0.96	1.14	1.05	0.92	0.88	1.05	0.87	0.84	1	0.96	1.15	1.19		0.9796	0.3446	0.5227	0.1792	0.1429	0.6099	0.3575	0.2765	0.2338	0.4017	0.9643	0.4738	0.7899	0.3828	0.2483	0.2652	0.782	0.4002	0.335	0.7818
	2376			1-oleoyl-2-docosahexaenoyl-GPC (18:1/22:6)*	LC/MS pos late	52697		HMDB0008123	24778955					1	1.28	1.09	0.83	0.94	1.27	1.08	0.83	0.93	0.85	0.65	0.73	0.76	0.86	1.13		0.0266	0.059	0.7475	0.2344	0.3547	0.6211	0.8393	0.4621	0.1383	0.3454	0.5123	0.3091	0.137	0.1586	0.7589	0.4864	0.198	0.1851	0.65	0.8257
	2377			1,2-dilinoleoyl-GPC (18:2/18:2)	LC/MS pos late	52603		HMDB0008138	5288075					1.6	0.98	1.48	0.78	1.44	0.61	0.93	0.49	0.9	1.51	0.8	1.47	0.53	0.97	1.84		0.6533	0.2628	0.0002	0.0004	0.8693	0.6834	0.0171	0.0381	0.9396	0.664	0.0535	0.0746	0.4858	0.2987	0.0632	0.1134	0.0204	0.0448	0.6166	0.8166
	2378			1-linoleoyl-2-linolenoyl-GPC (18:2/18:3)*	LC/MS pos late	53176		HMDB0008141	52922731					0.96	0.94	0.87	0.58	0.8	0.98	0.91	0.61	0.84	0.92	0.62	0.85	0.67	0.92	1.38		0.5625	0.237	0.1404	0.0658	0.768	0.6585	0.3541	0.2763	0.8668	0.6451	0.6253	0.361	0.361	0.2549	0.6748	0.4571	0.4464	0.2949	0.6581	0.8257
	2383			1-linoleoyl-2-arachidonoyl-GPC (18:2/20:4n6)*	LC/MS pos late	52710	C05208	HMDB0008147	24778979					1.81	1.2	1.72	0.67	1.54	0.67	0.95	0.37	0.85	1.43	0.55	1.28	0.39	0.89	2.31		0.2254	0.1381	0.0001	0.0002	0.4882	0.6261	0.0139	0.0329	0.4868	0.5223	0.0254	0.0478	0.1937	0.1881	0.0519	0.099	0.0679	0.0921	0.8017	0.8407
	2422		Phosphatidylethanolamine (PE)	1,2-dipalmitoyl-GPE (16:0/16:0)*	LC/MS pos late	57341		HMDB0008923	445468					1.21	0.85	4.31	3.03	1.26	0.71	3.56	2.5	1.04	5.04	3.55	1.48	0.7	0.29	0.42		0.6359	0.2583	0.1341	0.0638	0.1492	0.6099	0.6205	0.3828	0.6962	0.5951	0.0466	0.0681	0.3297	0.2433	0.4952	0.3894	0.3778	0.2673	0.1272	0.6579
	2426			1-palmitoyl-2-oleoyl-GPE (16:0/18:1)	LC/MS pos late	19263		HMDB0005320	5283496					1.88	1.37	3.23	2.1	1.98	0.72	1.71	1.11	1.05	2.37	1.54	1.45	0.65	0.61	0.94		0.2693	0.1531	0.0041	0.0043	0.3491	0.6211	0.024	0.0469	0.3154	0.4631	0.0017	0.0084	0.0676	0.1162	0.0193	0.0535	0.189	0.1808	0.3042	0.7665
	2428			1-palmitoyl-2-linoleoyl-GPE (16:0/18:2)	LC/MS pos late	42449		HMDB0005322	9546747					1.06	0.97	1.16	1.56	1.1	0.92	1.1	1.47	1.04	1.2	1.6	1.13	1.34	0.94	0.7		0.3176	0.1673	0.5531	0.1865	0.2594	0.6099	0.7687	0.4395	0.9041	0.6565	0.7986	0.4214	0.065	0.1162	0.8487	0.5075	0.6787	0.3741	0.9689	0.8558
	2434			1-palmitoyl-2-arachidonoyl-GPE (16:0/20:4)*	LC/MS pos late	52464	C05210	HMDB0005323	9546800					1.26	1.38	1.42	1.51	1.2	1.09	1.13	1.19	0.95	1.03	1.09	0.87	1.06	0.84	0.8		0.5087	0.2242	0.825	0.2538	0.2361	0.6099	0.2835	0.2391	0.1724	0.3647	0.2085	0.17	0.0746	0.1188	0.6389	0.4431	0.7632	0.3954	0.8487	0.8419
	2436			1-palmitoyl-2-docosahexaenoyl-GPE (16:0/22:6)*	LC/MS pos late	52465		HMDB0008946	9546799					1.82	1.57	1.44	1.32	1.7	0.86	0.79	0.72	0.93	0.91	0.84	1.08	0.92	1.18	1.28		0.9632	0.3403	0.1239	0.0599	0.1443	0.6099	0.0185	0.0392	0.1283	0.3411	0.2331	0.181	0.2739	0.2237	0.0946	0.1482	0.3688	0.2636	0.2179	0.7205
	2443			1-stearoyl-2-oleoyl-GPE (18:0/18:1)	LC/MS pos late	42448		HMDB0008993	9546742					3.58	0.87	4.52	1.44	3.58	0.24	1.26	0.4	1	5.18	1.65	4.09	0.32	0.79	2.48		0.5324	0.2291	2.1494e-10	4.7409e-09	0.2134	0.6099	6.2689e-06	0.0002	0.5071	0.5339	3.4005e-06	0.0003	0.1819	0.1836	1.4382e-05	0.0004	7.9735e-07	2.8727e-05	0.8434	0.8419
	2447			1-stearoyl-2-linoleoyl-GPE (18:0/18:2)*	LC/MS pos late	52446		HMDB0008994	9546749					2.52	0.99	2.6	1.36	2.4	0.39	1.03	0.54	0.95	2.64	1.38	2.43	0.52	0.92	1.76		0.5603	0.2364	3.2284e-07	1.8576e-06	0.3041	0.6099	8.069e-05	0.001	0.9298	0.6617	0.0004	0.0034	0.1392	0.1591	0.0004	0.0042	6.1827e-05	0.0008	0.617	0.8166
	2456			1-stearoyl-2-arachidonoyl-GPE (18:0/20:4)	LC/MS pos late	52447	C05210	HMDB0009003	5289133					2.01	1.3	2.05	1.31	1.91	0.65	1.02	0.65	0.95	1.58	1.01	1.47	0.64	0.93	1.46		0.8241	0.3069	0.0001	0.0002	0.3582	0.6211	0.0008	0.0059	0.2735	0.4272	0.0019	0.0089	0.1862	0.1856	0.0049	0.0219	0.0155	0.0394	0.7712	0.8407
	2460			1-stearoyl-2-docosahexaenoyl-GPE (18:0/22:6)*	LC/MS pos late	52466		HMDB0009012	9546798					1.8	1.24	1.44	1.42	1.69	0.69	0.8	0.79	0.94	1.16	1.14	1.36	0.99	1.17	1.19		0.5211	0.2269	0.0452	0.0278	0.1972	0.6099	0.0104	0.0277	0.4592	0.511	0.2269	0.1774	0.1191	0.1482	0.0523	0.099	0.0584	0.0858	0.1493	0.6706
	2462			1-oleoyl-2-linoleoyl-GPE (18:1/18:2)*	LC/MS pos late	52687		HMDB0005349	9546753					1.55	0.93	1.91	2.16	1.85	0.6	1.23	1.4	1.19	2.04	2.32	1.98	1.13	0.97	0.85		0.0427	0.07	0.0805	0.0429	0.1364	0.6099	0.0938	0.1171	0.8498	0.6401	0.0753	0.0927	0.009	0.0681	0.0398	0.0843	0.0638	0.0891	0.913	0.8455
	2465			1-oleoyl-2-arachidonoyl-GPE (18:1/20:4)*	LC/MS pos late	55041		HMDB0009069	348281223					1.77	1.53	2.94	2.29	1.86	0.86	1.67	1.29	1.05	1.93	1.5	1.22	0.78	0.63	0.81		0.2367	0.143	0.074	0.0405	0.3157	0.6149	0.0587	0.0879	0.1922	0.3695	0.01	0.0269	0.0404	0.1049	0.0563	0.1051	0.5369	0.33	0.4483	0.7971
	2469			1-oleoyl-2-docosahexaenoyl-GPE (18:1/22:6)*	LC/MS pos late	53209		HMDB0009078	52922113					1.41	1.54	2.12	2.28	1.49	1.09	1.5	1.61	1.05	1.38	1.48	0.97	1.08	0.7	0.65		0.3698	0.1867	0.757	0.2363	0.3076	0.6104	0.2238	0.2075	0.2271	0.3975	0.1434	0.1326	0.046	0.112	0.2779	0.2848	0.993	0.4612	0.7976	0.8407
	2470			1,2-dilinoleoyl-GPE (18:2/18:2)*	LC/MS pos late	53174		HMDB0009093	9546812					1.01	0.7	1.4	2.91	1.27	0.7	1.39	2.88	1.26	1.99	4.14	1.81	2.08	0.91	0.44		0.3075	0.1651	0.7159	0.2293	0.2323	0.6099	0.608	0.3772	0.5511	0.5449	0.5124	0.3091	0.1072	0.1416	0.6153	0.4372	0.2705	0.2228	0.8862	0.8419
	2472			1-linoleoyl-2-arachidonoyl-GPE (18:2/20:4)*	LC/MS pos late	53189		HMDB0009102	348279332					1.74	1.2	3.63	3.55	1.9	0.69	2.09	2.04	1.09	3.03	2.95	1.58	0.98	0.52	0.54		0.2643	0.1511	0.025	0.0175	0.2105	0.6099	0.0845	0.111	0.6695	0.5878	0.0083	0.0244	0.0436	0.1094	0.0521	0.099	0.1875	0.18	0.3157	0.7701
	2526		Phosphatidylserine (PS)	1-stearoyl-2-arachidonoyl-GPS (18:0/20:4)	LC/MS pos late	52235		HMDB0012383	24779545					0.9	0.56	8.95	6.28	0.89	0.63	9.96	6.99	0.99	15.9	11.15	1.57	0.7	0.1	0.14		0.4069	0.1986	0.6841	0.2219	0.0079	0.5102	0.9945	0.5031	0.5148	0.5383	0.0477	0.0693	0.064	0.1162	0.9374	0.5349	0.5193	0.3245	0.047	0.5054
	2552		Phosphatidylinositol (PI)	1-palmitoyl-2-oleoyl-GPI (16:0/18:1)*	LC/MS pos late	52669		HMDB0009783	71296232					2.62	0.88	3.11	0.77	2.45	0.34	1.19	0.29	0.93	3.52	0.87	2.77	0.25	0.79	3.18		0.193	0.1252	4.7433e-10	8.3697e-09	0.6161	0.6447	0.0002	0.0024	0.7113	0.5992	3.4171e-05	0.0009	0.0916	0.1311	0.0007	0.0057	7.8034e-05	0.001	0.5219	0.8015
	2554			1-palmitoyl-2-linoleoyl-GPI (16:0/18:2)	LC/MS pos late	52450		HMDB0009784	46891795					1.21	0.78	1.26	0.64	1.06	0.64	1.04	0.53	0.87	1.62	0.81	1.36	0.5	0.84	1.66		0.3164	0.167	0.0016	0.002	0.8143	0.6721	0.155	0.1615	0.4741	0.5177	0.1347	0.1279	0.1558	0.1688	0.4428	0.3659	0.0362	0.0655	0.9387	0.8491
	2557			1-palmitoyl-2-arachidonoyl-GPI (16:0/20:4)*	LC/MS pos late	52467		HMDB0009789						1.13	0.95	1.25	0.58	0.91	0.85	1.11	0.51	0.81	1.32	0.6	0.96	0.46	0.73	1.59		0.044	0.0712	0.0071	0.0065	0.8041	0.6706	0.222	0.2066	0.9392	0.664	0.1142	0.1172	0.0611	0.1162	0.8211	0.5	0.2513	0.2134	0.7088	0.8407
	2560			1-stearoyl-2-oleoyl-GPI (18:0/18:1)*	LC/MS pos late	52726		HMDB0240667						6.37	0.72	6.96	0.84	6.21	0.11	1.09	0.13	0.98	9.71	1.17	8.67	0.12	0.89	7.42		0.6637	0.2652	6e-15	1.617e-12	0.7268	0.6501	6.4368e-08	7.5324e-06	0.3243	0.4685	4.3532e-08	1.0263e-05	0.342	0.2459	1.5783e-07	1.6639e-05	3.2283e-09	1.3614e-06	0.8981	0.8419
	2561			1-stearoyl-2-linoleoyl-GPI (18:0/18:2)	LC/MS pos late	52468		HMDB0009809						2	0.99	2.03	0.77	1.94	0.49	1.02	0.38	0.97	2.06	0.78	1.96	0.38	0.95	2.52		0.7857	0.2975	2.2251e-06	9.655e-06	0.8575	0.6813	0.0019	0.0099	0.7179	0.6018	0.0031	0.0129	0.6334	0.3388	0.0039	0.0182	0.005	0.0184	0.8541	0.8419
	2574			1-stearoyl-2-arachidonoyl-GPI (18:0/20:4)	LC/MS pos late	52449		HMDB0009815						1.75	1.46	1.82	0.85	1.6	0.83	1.04	0.49	0.91	1.24	0.58	1.09	0.47	0.88	1.87		0.0843	0.0875	3.7924e-05	9.7454e-05	0.3008	0.6099	0.0018	0.0097	0.0463	0.2368	0.0013	0.0074	0.6289	0.3379	0.0071	0.0287	0.2006	0.1853	0.9049	0.8419
	2579			1-oleoyl-2-arachidonoyl-GPI (18:1/20:4)*	LC/MS pos late	54994								0.88	0.98	1.1	0.62	0.82	1.11	1.24	0.7	0.93	1.12	0.63	0.84	0.56	0.75	1.33		0.0538	0.0745	0.1509	0.0692	0.5421	0.6261	0.9631	0.4963	0.9258	0.6595	0.3413	0.2394	0.0514	0.1139	0.6982	0.4653	0.9626	0.4502	0.3649	0.7908
	2600		Lysophospholipid	1-palmitoyl-GPA (16:0)	LC/MS neg	34428	C04036	HMDB00327	6419701					1.07	0.8	0.73	0.63	0.94	0.74	0.68	0.59	0.87	0.92	0.79	1.17	0.86	1.28	1.48		0.0523	0.0741	0.1975	0.085	0.4713	0.6261	0.5948	0.3721	0.2261	0.3975	0.2311	0.1801	0.0346	0.1026	0.6394	0.4431	0.0855	0.1092	0.0878	0.6076
	2603			1-stearoyl-GPA (18:0)	LC/MS neg	36810		HMDB0062319	89567					0.57	1.06	1.22	0.77	0.9	1.84	2.13	1.35	1.57	1.16	0.73	0.85	0.63	0.74	1.17		0.1864	0.1241	0.4883	0.171	0.2159	0.6099	0.0707	0.0981	0.801	0.6232	0.615	0.3562	0.5226	0.309	0.8046	0.4948	0.0413	0.0705	0.0233	0.4371
	2605			1-linoleoyl-GPA (18:2)*	LC/MS neg	52690		HMDB0007856						1.5	0.66	0.97	0.64	1.31	0.44	0.64	0.43	0.88	1.47	0.97	2	0.66	1.36	2.06		0.0387	0.0685	0.0008	0.0011	0.5486	0.6261	0.078	0.1042	0.1048	0.3171	0.8853	0.4479	0.0581	0.1139	0.3062	0.3008	0.0013	0.0072	0.0579	0.5421
	2610			1-arachidonoyl-GPA (20:4)	LC/MS neg	46325		HMDB0062312	42607498					1.21	0.7	0.85	0.55	1.12	0.58	0.7	0.45	0.92	1.22	0.78	1.6	0.64	1.31	2.04		0.0616	0.08	0.0158	0.0121	0.4599	0.6261	0.3045	0.2481	0.1982	0.3751	0.6551	0.3692	0.0267	0.0992	0.8614	0.5108	0.0242	0.0489	0.1444	0.6706
	2613			1-myristoyl-GPC (14:0)	LC/MS pos late	45453	C04230	HMDB0010379	460604					0.73	1.08	0.78	0.93	0.73	1.47	1.06	1.27	1	0.72	0.87	0.68	1.2	0.95	0.79		0.4604	0.2139	8.1868e-05	0.0002	0.6715	0.6447	0.0092	0.0265	0.5389	0.5423	0.0187	0.0385	0.3831	0.2633	0.0095	0.0349	0.0018	0.0089	0.7734	0.8407
	2614			2-myristoyl-GPC (14:0)*	LC/MS pos late	35626		HMDB0010379	460604					0.74	1.11	0.81	0.87	0.74	1.5	1.1	1.18	1.01	0.73	0.78	0.67	1.07	0.92	0.85		0.1572	0.1149	0.0014	0.0019	0.6697	0.6447	0.0332	0.058	0.348	0.4859	0.133	0.1271	0.303	0.2377	0.0262	0.0643	0.0031	0.0134	0.5022	0.8015
	2617			1-pentadecanoyl-GPC (15:0)*	LC/MS pos late	37418		HMDB0010381	24779458					1.03	0.85	0.91	0.85	0.92	0.82	0.89	0.83	0.89	1.08	1.01	1.09	0.93	1.01	1.08		0.0143	0.0471	0.1969	0.0849	0.9111	0.6924	0.6869	0.4122	0.037	0.2111	0.2262	0.1774	0.0382	0.1046	0.2318	0.2556	0.0143	0.0378	0.1102	0.6317
	2618			1-palmitoyl-GPC (16:0)	LC/MS pos late	33955	C04102	HMDB0010382	86554					1.04	1.06	1.02	0.74	0.97	1.03	0.98	0.72	0.94	0.96	0.7	0.92	0.73	0.96	1.31		0.0138	0.0471	0.0766	0.0411	0.0743	0.6099	0.5457	0.351	0.4969	0.5285	0.7413	0.4021	0.0057	0.0618	0.9695	0.5435	0.9395	0.4442	0.7831	0.8407
	2619			2-palmitoyl-GPC (16:0)*	LC/MS neg	35253		HMDB0061702	15061532					1.17	1.09	1.03	0.62	0.92	0.93	0.88	0.53	0.79	0.94	0.56	0.84	0.6	0.9	1.5		0.0236	0.0568	0.0442	0.0275	0.2289	0.6099	0.2505	0.2236	0.6465	0.5838	0.659	0.3694	0.0181	0.0882	0.988	0.5475	0.4851	0.3093	0.4744	0.7971
	2620			1-palmitoleoyl-GPC (16:1)*	LC/MS pos late	33230		HMDB0010383	24779461					0.59	1.28	0.86	0.81	0.57	2.16	1.44	1.37	0.97	0.67	0.63	0.45	0.95	0.67	0.71		0.013	0.0471	0.0004	0.0006	0.5056	0.6261	0.0096	0.0268	0.1863	0.3672	0.166	0.1473	0.1227	0.1492	0.0066	0.0269	0.0002	0.0021	0.1947	0.7154
	2621			2-palmitoleoyl-GPC (16:1)*	LC/MS neg	47118		HMDB10383	122164832					0.53	1.2	0.71	0.73	0.29	2.29	1.36	1.38	0.56	0.59	0.6	0.24	1.02	0.41	0.4		0.0473	0.0724	0.0006	0.0009	0.8767	0.684	0.047	0.0738	0.7139	0.6001	0.033	0.0559	0.1167	0.1478	0.0013	0.0082	0.0204	0.0448	0.8734	0.8419
	2629			1-stearoyl-GPC (18:0)	LC/MS pos late	33961		HMDB0010384	497300					1.47	1.16	1.38	0.74	1.35	0.79	0.94	0.5	0.91	1.19	0.64	1.17	0.53	0.98	1.83		0.0906	0.089	1.2978e-05	4.2939e-05	0.1524	0.6099	0.0041	0.0164	0.2691	0.4246	0.0148	0.034	0.0807	0.1243	0.0195	0.0537	0.0603	0.0873	0.6189	0.8166
	2631			1-oleoyl-GPC (18:1)	LC/MS pos late	48258	C03916	HMDB0002815	16081932					1.05	1.18	1.17	0.68	1	1.13	1.12	0.64	0.96	0.99	0.57	0.85	0.58	0.86	1.48		0.0137	0.0471	0.0507	0.0303	0.1114	0.6099	0.566	0.3593	0.3154	0.4631	0.306	0.2221	0.0138	0.0796	0.7561	0.4857	0.6634	0.3696	0.6489	0.8257
	2634			1-linoleoyl-GPC (18:2)	LC/MS pos late	34419	C04100	HMDB0010386	11988421					1.25	0.93	1.17	0.69	1.13	0.74	0.93	0.55	0.91	1.26	0.75	1.22	0.59	0.97	1.63		0.1118	0.1002	0.0003	0.0005	0.4073	0.6261	0.0635	0.0921	0.7653	0.6129	0.1881	0.1587	0.0314	0.1002	0.2441	0.2617	0.0331	0.061	0.5701	0.8156
	2636			1-linolenoyl-GPC (18:3)*	LC/MS pos late	45951	C04100	HMDB0010388						1.09	1.03	1.07	0.66	0.91	0.94	0.98	0.6	0.84	1.04	0.64	0.89	0.62	0.86	1.39		0.0833	0.0869	0.056	0.0324	0.6002	0.638	0.364	0.2765	0.845	0.6392	0.4561	0.2887	0.063	0.1162	0.9796	0.5435	0.4746	0.305	0.8691	0.8419
	2639			1-nonadecanoyl-GPC (19:0)	LC/MS pos late	47087								1.24	0.88	1.01	0.6	1.02	0.7	0.81	0.48	0.82	1.15	0.69	1.16	0.6	1.01	1.69		0.0262	0.059	0.0013	0.0017	0.3174	0.6149	0.0703	0.0981	0.6381	0.579	0.5895	0.3443	0.0115	0.076	0.6083	0.4338	0.0249	0.0499	0.1947	0.7154
	2640			1-nonadecenoyl-GPC (19:1)*	LC/MS pos late	62429								1.17	0.93	1.21	0.65	1.17	0.8	1.04	0.55	1	1.3	0.7	1.25	0.53	0.96	1.8		0.1792	0.1216	0.0004	0.0007	0.2296	0.6099	0.17	0.1727	0.8621	0.6439	0.1479	0.1357	0.0263	0.0992	0.1874	0.2246	0.1239	0.1401	0.9381	0.8491
	2642			1-arachidoyl-GPC (20:0)	LC/MS pos late	45456	C04230	HMDB0010390	24779473					1.9	1.12	1.47	0.51	1.45	0.59	0.77	0.27	0.76	1.31	0.46	1.29	0.35	0.98	2.82		0.1563	0.1149	0.0001	0.0003	0.279	0.6099	0.0084	0.025	0.5373	0.5419	0.0785	0.0947	0.1174	0.1478	0.078	0.1274	0.0369	0.0657	0.3339	0.7818
	2645			1-eicosenoyl-GPC (20:1)*	LC/MS pos late	44560		HMDB0010391	52924051					0.96	1.18	1.04	0.72	1.02	1.23	1.08	0.75	1.06	0.88	0.61	0.86	0.7	0.98	1.41		0.172	0.1202	0.3014	0.1178	0.1679	0.6099	0.9524	0.4947	0.4459	0.5066	0.7187	0.3938	0.0703	0.1162	0.7672	0.4888	0.4818	0.3079	0.7636	0.8407
	2647			1-dihomo-linoleoyl-GPC (20:2)*	LC/MS pos late	33871		HMDB0010392						1.53	1.1	1.63	0.64	1.4	0.72	1.06	0.42	0.91	1.48	0.58	1.27	0.39	0.86	2.18		0.1344	0.1082	4.7513e-05	0.0001	0.5186	0.6261	0.0249	0.0481	0.6496	0.5842	0.0162	0.0357	0.0977	0.134	0.0657	0.1148	0.0678	0.0921	0.8575	0.8419
	2648			1-dihomo-linolenoyl-GPC (20:3n3 or 6)*	LC/MS neg	46205		HMDB0010394	52924055					0.9	1.22	1.08	0.46	0.67	1.36	1.19	0.51	0.74	0.88	0.38	0.55	0.43	0.62	1.46		0.0125	0.0471	0.1385	0.0652	0.3578	0.6211	0.7183	0.4211	0.6158	0.5713	0.4832	0.2971	0.016	0.0869	0.6418	0.4431	0.8874	0.4351	0.7322	0.8407
	2653			1-arachidonoyl-GPC (20:4n6)*	LC/MS pos late	33228	C05208	HMDB0010395	24779476					1.07	1.08	1.11	0.71	1.01	1	1.03	0.67	0.95	1.03	0.66	0.94	0.65	0.92	1.42		0.0468	0.0724	0.051	0.0303	0.2318	0.6099	0.4913	0.3273	0.551	0.5449	0.4077	0.2687	0.0275	0.0992	0.7908	0.4923	0.9262	0.4417	0.8876	0.8419
	2654			1-eicosapentaenoyl-GPC (20:5)*	LC/MS neg	44563		HMDB0010397						0.8	1.39	0.9	0.56	0.62	1.73	1.13	0.7	0.77	0.65	0.4	0.44	0.62	0.68	1.1		0.0313	0.062	0.7046	0.2273	0.5017	0.6261	0.9746	0.4996	0.5781	0.5525	0.9219	0.4616	0.044	0.1097	0.358	0.3284	0.5567	0.3341	0.8967	0.8419
	2656			1-behenoyl-GPC (22:0)	LC/MS pos late	39792		HMDB0010398	24779479					1.49	0.93	1.26	0.62	1.12	0.62	0.85	0.42	0.75	1.36	0.67	1.21	0.5	0.89	1.8		0.0359	0.0671	6.4826e-05	0.0001	0.6393	0.6447	0.0104	0.0277	0.8801	0.6518	0.0904	0.1033	0.0406	0.1049	0.277	0.2848	0.0071	0.0238	0.3408	0.7892
	2658			1-erucoyl-GPC (22:1)*	LC/MS pos late	55070		HMDB0010399	53480471					1.17	1.04	0.98	0.7	1.06	0.89	0.84	0.6	0.91	0.94	0.67	1.02	0.71	1.08	1.52		0.2042	0.1306	0.0277	0.0189	0.1601	0.6099	0.1865	0.1862	0.734	0.607	0.7906	0.4193	0.0613	0.1162	0.446	0.3659	0.3219	0.2464	0.2876	0.7483
	2659			1-adrenoyl-GPC (22:4)*	LC/MS pos late	52698		HMDB0010401	52924039					0.98	0.94	1.02	0.62	0.93	0.95	1.05	0.63	0.95	1.09	0.66	0.99	0.61	0.91	1.5		0.0356	0.0671	0.0417	0.0262	0.1359	0.6099	0.8446	0.4631	0.8474	0.6392	0.7027	0.3868	0.0048	0.0618	0.9055	0.5245	0.698	0.3778	0.8524	0.8419
	2663			1-docosahexaenoyl-GPC (22:6)*	LC/MS pos late	33822		HMDB0010404	10415542					1.07	0.89	0.96	0.53	0.87	0.83	0.9	0.49	0.82	1.08	0.59	0.98	0.55	0.91	1.65		0.0238	0.0568	0.0163	0.0124	0.2552	0.6099	0.3786	0.2834	0.7989	0.6223	0.697	0.3843	0.0065	0.0618	0.9476	0.538	0.2585	0.2166	0.6209	0.8176
	2665			1-tricosanoyl-GPC (23:0)*	LC/MS pos late	62456								1.05	1.11	0.76	0.68	0.87	1.05	0.72	0.65	0.83	0.69	0.61	0.78	0.89	1.14	1.28		0.2809	0.1561	0.8074	0.2488	0.2061	0.6099	0.5442	0.351	0.742	0.6088	0.3336	0.2374	0.1697	0.1753	0.7838	0.4915	0.7806	0.4	0.12	0.6579
	2667			1-lignoceroyl-GPC (24:0)	LC/MS pos late	49617		HMDB0010405	24779481					1.1	0.95	1.06	0.65	0.89	0.87	0.97	0.59	0.81	1.12	0.68	0.93	0.61	0.84	1.37		0.037	0.0671	0.0255	0.0178	0.7138	0.6492	0.2955	0.2447	0.9167	0.6581	0.3996	0.2655	0.0345	0.1026	0.8573	0.5102	0.2509	0.2134	0.8355	0.8419
	2669			1-nervonoyl-GPC (24:1n9)*	LC/MS pos late	55071		HMDB0010406	53480477					0.81	0.87	0.77	0.59	0.66	1.07	0.95	0.72	0.81	0.89	0.67	0.76	0.76	0.86	1.13		0.0032	0.0334	0.7454	0.2344	0.2868	0.6099	0.3612	0.2765	0.5011	0.5307	0.1578	0.1414	0.0012	0.0458	0.0221	0.0581	0.8076	0.4094	0.6079	0.8166
	2674			1-nisinoyl-GPC (24:6)*	LC/MS pos late	62463								1.36	0.79	1.19	0.54	1.08	0.58	0.88	0.4	0.79	1.52	0.69	1.37	0.45	0.9	1.99		0.1427	0.1103	0.0004	0.0006	0.6562	0.6447	0.0649	0.0932	0.5721	0.5525	0.1963	0.1635	0.0546	0.1139	0.3054	0.3008	0.0182	0.0419	0.5603	0.8156
	2680			1-palmitoyl-GPE (16:0)	LC/MS pos late	35631		HMDB0011503	9547069					0.94	1.08	0.86	0.91	0.88	1.15	0.92	0.97	0.93	0.8	0.84	0.81	1.05	1.02	0.97		0.2797	0.1561	0.0332	0.022	0.2079	0.6099	0.5095	0.3374	0.3924	0.4921	0.0675	0.0862	0.2397	0.2102	0.1153	0.1637	0.1343	0.1459	0.2308	0.7205
	2687			1-stearoyl-GPE (18:0)	LC/MS pos late	42398		HMDB0011130	9547068					1.36	1	1.2	0.78	1.2	0.74	0.88	0.57	0.88	1.2	0.78	1.19	0.65	1	1.53		0.1326	0.1079	8.4314e-05	0.0002	0.3311	0.6211	0.0085	0.025	0.8591	0.6425	0.1243	0.1236	0.0807	0.1243	0.0984	0.1507	0.0132	0.0362	0.2336	0.7205
	2688			2-stearoyl-GPE (18:0)*	LC/MS neg	41220		HMDB0011129	90658453;53480667					1.56	1.01	1.36	0.66	1.24	0.65	0.87	0.43	0.8	1.34	0.66	1.22	0.49	0.91	1.87		0.0454	0.0724	1.8103e-05	5.3836e-05	0.4695	0.6261	0.006	0.0199	0.8916	0.6554	0.045	0.0667	0.0407	0.1049	0.1252	0.1701	0.0085	0.0269	0.404	0.7971
	2689			1-oleoyl-GPE (18:1)	LC/MS pos late	35628		HMDB0011506	9547071					1.56	1.05	1.52	0.92	1.54	0.68	0.98	0.59	0.99	1.44	0.87	1.46	0.6	1.01	1.67		0.6587	0.2639	3.2828e-08	3.2181e-07	0.5832	0.6339	0.0002	0.0023	0.5699	0.5525	0.0005	0.004	0.4361	0.2812	0.0003	0.0036	0.0011	0.0067	0.7909	0.8407
	2691			1-linoleoyl-GPE (18:2)*	LC/MS pos late	36600		HMDB0011507	52925130					1.79	0.88	1.65	0.84	1.65	0.49	0.92	0.47	0.92	1.87	0.96	1.88	0.51	1	1.96		0.619	0.2541	1.9402e-06	8.8541e-06	0.8902	0.6877	0.0017	0.0095	0.7413	0.6088	0.015	0.0343	0.4928	0.2989	0.0073	0.0292	0.0007	0.0049	0.4073	0.7971
	2698			1-eicosenoyl-GPE (20:1)*	LC/MS pos late	62352		HMDB0011518	52925139					1.65	1.08	1.57	0.76	1.58	0.65	0.95	0.46	0.96	1.46	0.7	1.46	0.48	1	2.09		0.483	0.2202	3.2159e-05	8.6855e-05	0.5531	0.6261	0.0122	0.0299	0.704	0.5969	0.0214	0.0427	0.2502	0.2135	0.0219	0.0581	0.0302	0.0568	0.8163	0.8407
	2701			1-dihomo-linolenoyl-GPE (20:3n3 or 6)*	LC/MS neg	44630		HMDB0011516 HMDB0011514						1.04	1.25	1.19	0.57	0.87	1.19	1.14	0.55	0.83	0.96	0.46	0.7	0.48	0.73	1.51		0.0291	0.0603	0.0631	0.0358	0.3999	0.6261	0.3253	0.2596	0.288	0.44	0.2103	0.1709	0.0749	0.1188	0.7715	0.4888	0.9358	0.4442	0.7825	0.8407
	2704			1-arachidonoyl-GPE (20:4n6)*	LC/MS pos late	35186		HMDB0011517	42607465					1.61	1.23	1.44	0.83	1.37	0.77	0.9	0.51	0.85	1.17	0.67	1.11	0.57	0.95	1.66		0.1123	0.1004	6.2058e-05	0.0001	0.188	0.6099	0.0018	0.0097	0.1143	0.3301	0.0103	0.0271	0.3125	0.2401	0.0235	0.0597	0.088	0.1115	0.5104	0.8015
	2706			1-eicosapentaenoyl-GPE (20:5)*	LC/MS neg	47888		HMDB0011489	53480938					1.68	1.63	1.53	0.66	1.18	0.97	0.91	0.4	0.7	0.94	0.41	0.72	0.44	0.77	1.77		0.0517	0.0741	0.0062	0.0058	0.3935	0.6261	0.038	0.0644	0.1819	0.3647	0.0636	0.0828	0.2078	0.1965	0.3034	0.3003	0.4326	0.2887	0.8109	0.8407
	2715			1-docosahexaenoyl-GPE (22:6)*	LC/MS neg	44633		HMDB11496	85333229					1.56	1.27	1.19	0.63	1.18	0.82	0.77	0.4	0.76	0.94	0.5	0.93	0.53	0.99	1.88		0.0799	0.085	0.0044	0.0045	0.1459	0.6099	0.0278	0.0507	0.2213	0.3956	0.1743	0.1512	0.117	0.1478	0.2267	0.2522	0.3015	0.2369	0.3704	0.7918
	2719			1-palmitoyl-GPS (16:0)*	LC/MS neg	46130			9547100					0.4	0.6	1.24	1.07	0.48	1.53	3.12	2.71	1.2	2.04	1.77	0.79	0.87	0.39	0.44		0.987	0.3452	0.1582	0.0718	0.1357	0.6099	0.0505	0.0787	0.1374	0.3453	0.4688	0.2936	0.656	0.3455	0.0962	0.1493	0.6171	0.3527	0.2048	0.7154
	2720			1-stearoyl-GPS (18:0)*	LC/MS neg	45966		HMDB0061698	74819135					0.69	0.77	1.99	1.19	0.7	1.12	2.9	1.73	1.03	2.6	1.55	0.92	0.6	0.35	0.59		0.9845	0.3448	0.5024	0.1745	0.4163	0.6261	0.3784	0.2834	0.3925	0.4921	0.8709	0.444	0.9193	0.4223	0.3838	0.343	0.9792	0.4563	0.4713	0.7971
	2723			1-linoleoyl-GPS (18:2)*	LC/MS neg	43676								1.28	0.49	3.88	1.29	1.37	0.38	3.03	1.01	1.07	7.91	2.63	2.79	0.33	0.35	1.06		0.888	0.3231	0.0049	0.0048	0.1393	0.6099	0.4793	0.323	0.114	0.3301	0.0865	0.1008	0.8704	0.4071	0.3598	0.3294	0.0253	0.0502	0.3019	0.7633
	2726			1-palmitoyl-GPG (16:0)*	LC/MS neg	45970		HMDB0240601	3300276					0.84	1.14	0.91	0.84	0.77	1.36	1.08	1	0.92	0.79	0.74	0.67	0.93	0.85	0.91		0.2392	0.143	0.1626	0.0732	0.7497	0.6541	0.4179	0.2959	0.5044	0.532	0.4951	0.302	0.2947	0.2363	0.1857	0.2242	0.1439	0.1525	0.8971	0.8419
	2729			1-stearoyl-GPG (18:0)	LC/MS neg	34437								0.75	1.06	0.74	0.77	0.65	1.42	0.99	1.03	0.87	0.7	0.73	0.61	1.04	0.88	0.85		0.1334	0.1079	0.0084	0.0074	0.4422	0.6261	0.1351	0.1518	0.6341	0.577	0.0444	0.0665	0.1023	0.1375	0.0208	0.0565	0.0521	0.0808	0.5827	0.8156
	2731			1-oleoyl-GPG (18:1)*	LC/MS neg	45968		HMDB0240602						1.07	1.04	1.18	0.78	0.97	0.97	1.11	0.73	0.91	1.14	0.75	0.94	0.66	0.82	1.25		0.258	0.1485	0.1584	0.0718	0.7125	0.6492	0.6547	0.3975	0.9676	0.6742	0.566	0.3352	0.1399	0.1591	0.9966	0.5486	0.6842	0.3745	0.8986	0.8419
	2733			1-linoleoyl-GPG (18:2)*	LC/MS neg	54885		HMDB0240600						0.75	1.07	0.73	0.6	0.62	1.42	0.97	0.8	0.83	0.68	0.56	0.58	0.83	0.86	1.04		0.089	0.089	0.4795	0.169	0.4271	0.6261	0.6342	0.3887	0.5834	0.5529	0.454	0.2878	0.0747	0.1188	0.2077	0.2413	0.3083	0.2395	0.7833	0.8407
	2735			1-palmitoyl-GPI (16:0)	LC/MS neg	35305		HMDB0061695	71296207					1.02	0.81	1.16	0.57	0.81	0.79	1.13	0.56	0.79	1.44	0.71	1.01	0.5	0.7	1.41		0.026	0.059	0.0087	0.0076	0.6289	0.6447	0.4075	0.2931	0.4459	0.5066	0.1726	0.151	0.0288	0.1002	0.6405	0.4431	0.1164	0.1348	0.5834	0.8156
	2736			1-palmitoleoyl-GPI (16:1)*	LC/MS neg	36618		HMDB0061695						0.94	0.57	2.7	1.45	0.91	0.61	2.88	1.54	0.97	4.72	2.54	1.59	0.54	0.34	0.63		0.9905	0.3461	0.154	0.0704	0.0955	0.6099	0.8088	0.4517	0.1675	0.3647	0.2195	0.1748	0.938	0.4277	0.9767	0.5435	0.2518	0.2134	0.1441	0.6706
	2739			1-stearoyl-GPI (18:0)	LC/MS neg	19324		HMDB0240261	71581135;42607495					1.26	1.07	1.35	0.67	1.09	0.85	1.07	0.53	0.86	1.27	0.63	1.02	0.49	0.81	1.63		0.05	0.0738	0.0014	0.0019	0.7247	0.6501	0.0661	0.0941	0.4696	0.5137	0.0338	0.0568	0.1205	0.149	0.3178	0.3067	0.252	0.2134	0.7572	0.8407
	2740			2-stearoyl-GPI (18:0)*	LC/MS neg	39223		HMDB0061704	131770413					1.16	1.07	1.29	0.66	1.04	0.92	1.11	0.56	0.89	1.21	0.62	0.97	0.51	0.8	1.58		0.0471	0.0724	0.0058	0.0055	0.6948	0.6483	0.1662	0.1705	0.558	0.5492	0.0698	0.0884	0.0904	0.1311	0.5202	0.4017	0.4166	0.2855	0.6513	0.8257
	2741			1-oleoyl-GPI (18:1)	LC/MS neg	36602		HMDB0061693	86289645					1.93	0.77	1.9	0.64	1.7	0.4	0.99	0.33	0.88	2.47	0.83	2.2	0.34	0.89	2.65		0.0757	0.0846	3.126e-09	3.94e-08	0.4996	0.6261	0.001	0.0064	0.2459	0.4079	0.0014	0.0078	0.0176	0.0882	0.0087	0.0335	2.9801e-05	0.0005	0.8868	0.8419
	2743			1-linoleoyl-GPI (18:2)*	LC/MS neg	36594		HMDB0240597	11124828					1.27	0.75	1.1	0.58	1.15	0.59	0.87	0.46	0.91	1.46	0.77	1.54	0.53	1.05	1.99		0.2958	0.1611	0.0009	0.0013	0.5098	0.6261	0.0912	0.1157	0.5701	0.5525	0.3669	0.2509	0.0873	0.1294	0.2114	0.2429	0.0268	0.0521	0.4166	0.7971
	2749			1-arachidonoyl-GPI (20:4)*	LC/MS neg	34214		HMDB0061690	121596217					1.22	0.97	1.14	0.54	1.03	0.79	0.94	0.45	0.84	1.18	0.56	1.06	0.48	0.9	1.89		0.0647	0.0815	0.0029	0.0032	0.2817	0.6099	0.1148	0.1346	0.6698	0.5878	0.2167	0.1741	0.0339	0.1026	0.385	0.343	0.2432	0.2131	0.7218	0.8407
	2750			2-arachidonoyl-GPI (20:4)*	LC/MS neg	38077								1.18	0.96	1.17	0.53	1	0.82	0.99	0.44	0.84	1.21	0.54	1.03	0.45	0.85	1.9		0.0589	0.0781	0.0036	0.0039	0.3518	0.6211	0.1483	0.1585	0.6836	0.5905	0.179	0.1538	0.0363	0.1033	0.4388	0.3637	0.2933	0.2334	0.9155	0.8455
	2807		Plasmalogen	1-palmityl-2-palmitoyl-GPC (O-16:0/16:0)*	LC/MS pos late	57332			145911					1.15	1.08	1.04	1.01	1.19	0.94	0.9	0.87	1.03	0.96	0.93	1.1	0.97	1.14	1.18		0.8551	0.3158	0.0756	0.0409	0.2099	0.6099	0.1043	0.1267	0.3889	0.4921	0.6478	0.3656	0.9174	0.4223	0.0511	0.0985	0.4322	0.2887	0.2358	0.7235
	2808			1-palmityl-2-stearoyl-GPC (O-16:0/18:0)*	LC/MS pos late	55040		HMDB0013405	11803170					1.86	1	1.84	0.93	1.83	0.54	0.99	0.5	0.99	1.83	0.93	1.83	0.51	1	1.98		0.9154	0.3289	2.331e-09	3.2472e-08	0.7957	0.6689	3.9859e-05	0.0006	0.9067	0.6565	0.0002	0.0024	0.6716	0.3495	6.2365e-05	0.001	5.6936e-05	0.0008	0.5946	0.8158
	2810			1-palmityl-2-linoleoyl-GPC (O-16:0/18:2)*	LC/MS pos late	53175		HMDB0011151	6443157					1.14	0.96	1.02	0.94	1.14	0.84	0.89	0.82	0.99	1.06	0.98	1.19	0.93	1.11	1.2		0.548	0.2331	0.0879	0.0459	0.6648	0.6447	0.2071	0.1971	0.7817	0.6149	0.9998	0.4781	0.6295	0.3379	0.3296	0.3115	0.1266	0.1411	0.207	0.7162
	2818			1-(1-enyl-palmitoyl)-2-oleoyl-GPE (P-16:0/18:1)*	LC/MS pos late	52477		HMDB0011342	52925128					1.58	0.97	1.74	1.19	1.53	0.61	1.1	0.75	0.97	1.79	1.22	1.58	0.68	0.88	1.29		0.9778	0.3443	6.4166e-06	2.3265e-05	0.7332	0.6501	0.0037	0.0153	0.8125	0.628	0.002	0.0093	0.6553	0.3455	0.0062	0.0261	0.0019	0.0092	0.819	0.8407
	2819			1-(1-enyl-palmitoyl)-2-linoleoyl-GPE (P-16:0/18:2)*	LC/MS pos late	52677		HMDB0011343	52925127					0.83	1	0.65	0.78	0.81	1.2	0.78	0.94	0.97	0.65	0.79	0.81	1.21	1.25	1.03		0.4346	0.208	0.0924	0.0476	0.1252	0.6099	0.3714	0.2812	0.8885	0.6545	0.0224	0.0434	0.1283	0.1529	0.2702	0.2814	0.3024	0.2369	0.1475	0.6706
	2820			1-(1-enyl-palmitoyl)-2-palmitoyl-GPC (P-16:0/16:0)*	LC/MS pos late	52716		HMDB0011206	11146967					1.06	0.93	1.03	0.9	1.04	0.88	0.97	0.86	0.99	1.1	0.97	1.11	0.88	1.01	1.15		0.3868	0.1924	0.0124	0.0102	0.628	0.6447	0.4022	0.2921	0.285	0.44	0.6879	0.3815	0.1161	0.1478	0.5458	0.4125	0.0611	0.0874	0.6607	0.8258
	2821			1-(1-enyl-palmitoyl)-2-palmitoleoyl-GPC (P-16:0/16:1)*	LC/MS pos late	52713		HMDB0011207	52923882					0.59	0.88	0.52	0.87	0.65	1.48	0.87	1.46	1.09	0.59	0.99	0.74	1.68	1.25	0.75		0.6161	0.2535	0.0187	0.014	0.8346	0.677	0.0958	0.119	0.4678	0.5133	0.024	0.046	0.5343	0.3115	0.1277	0.1725	0.3353	0.2514	0.5226	0.8015
	2822			1-(1-enyl-palmitoyl)-2-arachidonoyl-GPE (P-16:0/20:4)*	LC/MS pos late	52673		HMDB0011352	52925126					1.1	0.9	1.1	0.85	0.97	0.82	1	0.77	0.89	1.23	0.94	1.08	0.77	0.88	1.15		0.1631	0.1164	0.0139	0.011	0.8247	0.674	0.3216	0.258	0.3995	0.4924	0.3209	0.2299	0.1062	0.1412	0.9686	0.5435	0.0714	0.0947	0.9989	0.8658
	2824			1-(1-enyl-palmitoyl)-2-oleoyl-GPC (P-16:0/18:1)*	LC/MS pos late	52478		HMDB0007996	34779384					1.22	0.95	1.14	0.91	1.2	0.78	0.94	0.75	0.99	1.2	0.96	1.26	0.8	1.05	1.32		0.4553	0.2124	1.4774e-05	4.7689e-05	0.5288	0.6261	0.016	0.0365	0.5224	0.5383	0.1009	0.1101	0.1563	0.1688	0.0235	0.0597	0.0031	0.0133	0.4045	0.7971
	2827			1-(1-enyl-stearoyl)-2-oleoyl-GPE (P-18:0/18:1)	LC/MS pos late	52614		HMDB0011375	42607457					2.54	0.98	2.37	1	2.69	0.39	0.93	0.39	1.06	2.42	1.02	2.75	0.42	1.14	2.69		0.8893	0.3232	1.21e-13	1.6063e-11	0.6953	0.6483	1.5943e-07	1.4656e-05	0.8924	0.6554	6.4826e-07	7.059e-05	0.6733	0.3496	4.358e-08	7.2617e-06	1.0518e-07	8.4664e-06	0.6501	0.8257
	2828			1-(1-enyl-stearoyl)-2-linoleoyl-GPE (P-18:0/18:2)*	LC/MS pos late	52748		HMDB0011376						1.49	1.03	1.21	0.77	1.42	0.69	0.81	0.52	0.95	1.18	0.75	1.38	0.64	1.17	1.83		0.5338	0.2291	0.0001	0.0002	0.2161	0.6099	0.0107	0.0277	0.7943	0.6202	0.1741	0.1512	0.2188	0.2	0.023	0.0596	0.0202	0.0448	0.1996	0.7154
	2831			1-(1-enyl-palmitoyl)-2-arachidonoyl-GPC (P-16:0/20:4)*	LC/MS pos late	52689		HMDB0011220						1.09	0.99	1.25	0.79	1.1	0.91	1.14	0.72	1.01	1.26	0.79	1.11	0.63	0.89	1.4		0.2148	0.1347	0.002	0.0023	0.3363	0.6211	0.4163	0.2957	0.6843	0.5905	0.1139	0.1172	0.0484	0.1139	0.3787	0.3423	0.2258	0.2018	0.4302	0.7971
	2832			1-(1-enyl-palmitoyl)-2-linoleoyl-GPC (P-16:0/18:2)*	LC/MS pos late	52682		HMDB0011211	24779386					1.13	0.97	1.28	0.67	1.06	0.86	1.13	0.6	0.94	1.32	0.69	1.1	0.53	0.83	1.58		0.0734	0.0845	0.0048	0.0048	0.5	0.6261	0.2827	0.2388	0.9778	0.6763	0.1549	0.1404	0.0391	0.1046	0.5903	0.427	0.295	0.2335	0.7193	0.8407
	2836			1-(1-enyl-stearoyl)-2-arachidonoyl-GPE (P-18:0/20:4)*	LC/MS pos late	52475		HMDB0005779	9547058					1.55	1	1.42	0.76	1.47	0.65	0.91	0.49	0.95	1.41	0.76	1.47	0.54	1.04	1.93		0.4006	0.1964	3.1936e-06	1.3208e-05	0.4206	0.6261	0.0053	0.0189	0.9691	0.6742	0.0217	0.0429	0.1274	0.1527	0.012	0.0404	0.0059	0.0211	0.5756	0.8156
	2848		Lysoplasmalogen	1-palmityl-GPE (O-16:0)*	LC/MS neg	55007								1.52	0.83	1.31	0.6	1.28	0.55	0.86	0.39	0.84	1.58	0.72	1.54	0.46	0.98	2.14		0.0618	0.08	3.3372e-06	1.3589e-05	0.4943	0.6261	0.0101	0.0274	0.4355	0.5048	0.0715	0.0893	0.0193	0.0892	0.0982	0.1507	0.0012	0.007	0.396	0.7971
	2849			1-palmityl-GPC (O-16:0)	LC/MS pos late	20458			3983					1.27	1.03	1.18	0.77	1.25	0.81	0.92	0.6	0.98	1.14	0.75	1.21	0.65	1.06	1.62		0.1379	0.1094	6.6356e-05	0.0001	0.1204	0.6099	0.0254	0.0486	0.7888	0.6176	0.1349	0.1279	0.0268	0.0992	0.064	0.1134	0.0464	0.075	0.427	0.7971
	2850			1-stearyl-GPC (O-18:0)*	LC/MS pos late	52703	C04317	HMDB0011149	2733532					2.25	0.99	1.84	0.73	2.03	0.44	0.82	0.32	0.9	1.85	0.74	2.05	0.4	1.11	2.78		0.1424	0.1103	3.8168e-11	1.4432e-09	0.1765	0.6099	2.5761e-06	9.1083e-05	0.9546	0.6692	0.0003	0.003	0.0573	0.1139	4.102e-05	0.0008	3.0734e-06	8.6403e-05	0.1269	0.6579
	2852			1-(1-enyl-palmitoyl)-GPC (P-16:0)*	LC/MS pos late	52474		HMDB0010407	10917802					1	0.86	1.03	0.72	0.98	0.86	1.03	0.72	0.97	1.2	0.84	1.13	0.7	0.94	1.35		0.0398	0.0685	0.0061	0.0058	0.1611	0.6099	0.8143	0.4531	0.1826	0.3647	0.6567	0.3692	0.0027	0.0559	0.829	0.5005	0.1193	0.1371	0.8337	0.8419
	2853			1-(1-enyl-palmitoyl)-GPE (P-16:0)*	LC/MS pos late	39270		HMDB0011152						0.94	0.8	0.99	0.65	0.95	0.85	1.05	0.69	1.01	1.23	0.8	1.18	0.65	0.96	1.47		0.1671	0.118	0.0382	0.0245	0.3023	0.6099	0.9952	0.5031	0.195	0.3712	0.7783	0.416	0.0204	0.0892	0.7679	0.4888	0.197	0.1847	0.7737	0.8407
	2855			1-(1-enyl-oleoyl)-GPE (P-18:1)*	LC/MS pos late	44621								0.71	0.74	0.78	0.51	0.75	1.04	1.1	0.73	1.06	1.05	0.7	1.02	0.66	0.97	1.47		0.2137	0.1346	0.5433	0.1836	0.3515	0.6211	0.4239	0.2975	0.2185	0.3931	0.5755	0.3387	0.0301	0.1002	0.2904	0.2945	0.6601	0.3687	0.8089	0.8407
	2857			1-(1-enyl-stearoyl)-GPE (P-18:0)*	LC/MS pos late	39271		HMDB0240598						1.72	0.85	1.42	0.76	1.6	0.5	0.83	0.44	0.93	1.68	0.9	1.88	0.53	1.12	2.1		0.2313	0.1411	2.4287e-08	2.4725e-07	0.6132	0.6447	0.0004	0.0033	0.3786	0.4921	0.0129	0.0309	0.1348	0.1574	0.0019	0.011	2.7518e-05	0.0005	0.2044	0.7154
	2860		Glycerolipid Metabolism	glycerol	LC/MS neg	15122	C00116	HMDB0000131	753					1.12	1.06	1.26	1.39	1.23	0.94	1.13	1.24	1.1	1.2	1.31	1.17	1.1	0.98	0.89		0.0943	0.0899	0.5044	0.1747	0.2818	0.6099	0.3636	0.2765	0.5806	0.5525	0.092	0.1039	0.0169	0.0882	0.1226	0.1693	0.719	0.3835	0.4229	0.7971
	2861			glycerol 3-phosphate	LC/MS pos early	43847	C0093	HMDB0000126	754					1.19	0.93	1.24	1	1.18	0.78	1.04	0.84	0.99	1.33	1.08	1.27	0.81	0.95	1.18		0.8464	0.3134	0.0024	0.0028	0.8538	0.6813	0.151	0.1599	0.5344	0.5416	0.1111	0.1168	0.5276	0.3103	0.2057	0.2396	0.0433	0.0716	0.8689	0.8419
	2866			glycerophosphoglycerol	LC/MS polar	48857	C03274	HMDB0240316	54575349					0.5	0.9	0.45	0.92	0.41	1.81	0.91	1.84	0.82	0.5	1.02	0.46	2.03	0.91	0.45		0.5076	0.2242	5.5291e-07	2.9866e-06	0.9338	0.7011	0.0028	0.0131	0.5872	0.5531	0.0002	0.0021	0.6803	0.3522	0.0003	0.0031	0.0117	0.033	0.3153	0.7701
	2870		Monoacylglycerol	1-palmitoylglycerol (16:0)	LC/MS neg	21127		HMDB0011564	14900					4.65	2.5	4.72	1.67	4.59	0.54	1.01	0.36	0.99	1.88	0.67	1.83	0.35	0.97	2.75		0.7153	0.2771	0.0005	0.0007	0.3967	0.6261	0.0056	0.0193	0.1808	0.3647	0.0183	0.0381	0.9351	0.4277	0.0116	0.0394	0.1217	0.1388	0.636	0.8257
	2871			1-palmitoleoylglycerol (16:1)*	LC/MS neg	52431		HMDB0011565						0.95	2.02	1.18	0.88	0.67	2.13	1.24	0.93	0.71	0.58	0.44	0.33	0.75	0.57	0.76		0.046	0.0724	0.7519	0.2355	0.7027	0.6489	0.8395	0.4621	0.137	0.3453	0.5201	0.3129	0.4272	0.2777	0.4962	0.3894	0.1962	0.1847	0.6585	0.8257
	2874			1-oleoylglycerol (18:1)	LC/MS neg	21184		HMDB0011567	5283468					1.49	1.47	1.51	0.59	1.14	0.99	1.01	0.4	0.77	1.03	0.4	0.78	0.39	0.76	1.94		0.0742	0.0846	0.0124	0.0102	0.383	0.6241	0.1109	0.1313	0.2874	0.44	0.1288	0.1255	0.1322	0.1557	0.3689	0.3341	0.5825	0.3412	0.9367	0.8491
	2875			1-linoleoylglycerol (18:2)	LC/MS neg	27447		HMDB0011568	5283469					1.62	1.19	1.32	0.66	1.17	0.74	0.82	0.4	0.72	1.11	0.55	0.98	0.5	0.89	1.79		0.3409	0.176	0.0463	0.0284	0.5455	0.6261	0.1371	0.1519	0.5828	0.5529	0.4011	0.2655	0.2968	0.2364	0.4886	0.3871	0.3404	0.2531	0.5066	0.8015
	2876			1-linolenoylglycerol (18:3)	LC/MS neg	34393		HMDB0011569	53480978					1.24	1.89	1.72	1.33	0.64	1.52	1.39	1.07	0.52	0.91	0.7	0.34	0.77	0.37	0.48		0.1868	0.1241	0.5591	0.1883	0.8682	0.6834	0.9878	0.5025	0.2499	0.4101	0.3654	0.2503	0.8475	0.4016	0.5793	0.4253	0.2439	0.2131	0.3576	0.7908
	2880			1-dihomo-linolenylglycerol (20:3)	LC/MS neg	48341		HMDB0011577						1.06	1.06	1.13	0.6	0.88	1	1.07	0.57	0.83	1.07	0.57	0.83	0.53	0.78	1.46		0.1481	0.1121	0.1173	0.0574	0.6682	0.6447	0.4726	0.3194	0.7315	0.6058	0.4535	0.2878	0.1225	0.1492	0.9529	0.5394	0.706	0.3778	0.9748	0.8581
	2881			1-arachidonylglycerol (20:4)	LC/MS neg	34397	C13857	HMDB11578	16019980;5282281					1.4	0.87	1.35	0.7	1.43	0.62	0.96	0.5	1.02	1.55	0.8	1.64	0.52	1.06	2.05		0.4942	0.2218	0.0006	0.0008	0.5252	0.6261	0.0848	0.1111	0.6884	0.5923	0.2173	0.1741	0.1377	0.1589	0.119	0.1652	0.0361	0.0655	0.6087	0.8166
	2885			1-docosahexaenoylglycerol (22:6)	LC/MS neg	35153		HMDB0011587	53480995					1.62	1.01	1.09	0.88	1.65	0.62	0.67	0.54	1.02	1.08	0.87	1.63	0.81	1.51	1.87		0.634	0.2581	0.1003	0.0507	0.6912	0.6482	0.1357	0.1518	0.9969	0.6772	0.7555	0.4077	0.7341	0.3682	0.4668	0.3782	0.1348	0.1461	0.2333	0.7205
	2890			2-oleoylglycerol (18:1)	LC/MS neg	21232		HMDB0011537	5319879					1.8	1.55	1.98	0.78	1.4	0.86	1.1	0.43	0.78	1.27	0.5	0.9	0.39	0.71	1.8		0.0387	0.0685	0.0287	0.0194	0.7604	0.6585	0.1146	0.1346	0.1363	0.3453	0.0318	0.0548	0.4207	0.2754	0.425	0.3583	0.9264	0.4417	0.5416	0.8091
	2891			2-linoleoylglycerol (18:2)	LC/MS neg	32506		HMDB0011538	5365676					1.24	1.36	1.1	0.88	1.27	1.1	0.88	0.71	1.03	0.81	0.65	0.94	0.8	1.16	1.44		0.7509	0.2884	0.7162	0.2293	0.6745	0.6447	0.8873	0.4765	0.3919	0.4921	0.9941	0.4774	0.8577	0.4036	0.8414	0.5041	0.3196	0.2455	0.8932	0.8419
	2892			2-arachidonoylglycerol (20:4)	LC/MS neg	19266	C13856	HMDB0004666	5282280					1	0.4	1.38	0.73	0.79	0.4	1.38	0.72	0.79	3.49	1.83	1.99	0.52	0.57	1.09		0.6123	0.2526	0.0485	0.0292	0.0534	0.6099	0.9077	0.4812	0.0481	0.2368	0.241	0.1861	0.4772	0.2958	0.595	0.4294	0.0373	0.0657	0.2894	0.7483
	2926		Diacylglycerol	palmitoyl-linoleoyl-glycerol (16:0/18:2) [2]*	LC/MS pos late	52634		HMDB0007103	131801744					2.02	0.95	2.98	1.35	1.32	0.47	1.48	0.67	0.66	3.15	1.43	1.4	0.45	0.44	0.98		0.6319	0.2577	0.0085	0.0075	0.184	0.6099	0.0582	0.0874	0.835	0.6366	0.0163	0.0358	0.6706	0.3495	0.5768	0.4253	0.037	0.0657	0.5772	0.8156
	2945			oleoyl-linoleoyl-glycerol (18:1/18:2) [1]	LC/MS pos late	46798		HMDB0007219	14275396					1.27	1.27	1.69	0.71	1.12	1	1.33	0.56	0.88	1.34	0.56	0.89	0.42	0.66	1.57		0.2383	0.143	0.0539	0.0315	0.7333	0.6501	0.2432	0.2194	0.3813	0.4921	0.1528	0.1389	0.3775	0.2619	0.4302	0.3601	0.7658	0.3958	0.7855	0.8407
	2946			oleoyl-linoleoyl-glycerol (18:1/18:2) [2]	LC/MS pos late	46799		HMDB0007219	71433693					1.32	1.25	1.65	0.82	1.12	0.95	1.25	0.62	0.85	1.32	0.65	0.9	0.5	0.68	1.37		0.2747	0.1551	0.0765	0.0411	0.8223	0.6731	0.172	0.1738	0.2882	0.44	0.1119	0.1168	0.6865	0.3549	0.425	0.3583	0.7544	0.3923	0.8147	0.8407
	2950			linoleoyl-linoleoyl-glycerol (18:2/18:2) [1]*	LC/MS pos late	54968		HMDB0007248	9543729					0.91	0.83	1.27	1.32	0.65	0.91	1.4	1.45	0.71	1.53	1.59	0.78	1.04	0.51	0.49		0.6721	0.2667	0.8546	0.2604	0.8081	0.6706	0.7976	0.4492	0.9442	0.6657	0.6885	0.3815	0.8478	0.4016	0.5479	0.4125	0.7442	0.3895	0.8849	0.8419
	2951			linoleoyl-linoleoyl-glycerol (18:2/18:2) [2]*	LC/MS pos late	54969		HMDB0007248	9543729					1.09	1	1.39	2.46	0.87	0.92	1.28	2.27	0.8	1.39	2.47	0.88	1.77	0.63	0.35		0.984	0.3448	0.8861	0.2662	0.4795	0.6261	0.7768	0.4419	0.985	0.6763	0.6073	0.3534	0.4336	0.2805	0.7804	0.4915	0.7624	0.3954	0.8172	0.8407
	2956			stearoyl-arachidonoyl-glycerol (18:0/20:4) [1]*	LC/MS pos late	57450	C00165	HMDB0007170	6438587					1.72	0.81	1.61	0.73	1.78	0.47	0.93	0.42	1.03	1.98	0.9	2.19	0.45	1.1	2.44		0.7766	0.2947	0.0001	0.0002	0.7162	0.6492	0.0277	0.0507	0.73	0.6058	0.1062	0.1142	0.4542	0.2873	0.0235	0.0597	0.0121	0.0341	0.5282	0.8015
	2957			stearoyl-arachidonoyl-glycerol (18:0/20:4) [2]*	LC/MS pos late	57449		HMDB0007170	6438587					1.69	0.75	1.17	0.68	1.85	0.44	0.69	0.4	1.09	1.55	0.91	2.46	0.59	1.59	2.7		0.325	0.1699	0.0003	0.0006	0.2406	0.6099	0.1085	0.1297	0.3538	0.4915	0.5695	0.3361	0.2421	0.2115	0.0173	0.0501	0.0139	0.0375	0.2909	0.7497
	2958			oleoyl-arachidonoyl-glycerol (18:1/20:4) [1]*	LC/MS pos late	54960		HMDB0007228	9543786					1.81	1.01	1.47	1.01	1.96	0.56	0.82	0.56	1.08	1.47	1.01	1.95	0.69	1.33	1.93		0.4136	0.2013	0.0001	0.0003	0.2748	0.6099	0.0045	0.017	0.8032	0.6235	0.1769	0.1526	0.9112	0.4207	0.002	0.0114	0.0086	0.0269	0.1074	0.6317
	2959			oleoyl-arachidonoyl-glycerol (18:1/20:4) [2]*	LC/MS pos late	54961		HMDB0007228	9543786					1.72	0.93	1.58	1.18	1.78	0.54	0.92	0.69	1.03	1.7	1.27	1.91	0.75	1.13	1.5		0.2698	0.1531	0.0001	0.0002	0.7889	0.6672	0.0043	0.0168	0.7409	0.6088	0.0445	0.0665	0.3257	0.2423	0.004	0.0185	0.0018	0.0089	0.3423	0.7894
	2960			linoleoyl-arachidonoyl-glycerol (18:2/20:4) [1]*	LC/MS pos late	54955		HMDB0007257	9543796					1.52	0.78	1.38	1.39	1.67	0.51	0.91	0.92	1.1	1.76	1.78	2.13	1.01	1.21	1.2		0.1767	0.1211	0.008	0.0072	0.9425	0.7014	0.0707	0.0981	0.456	0.5096	0.39	0.2629	0.4901	0.2989	0.0454	0.0918	0.0129	0.0356	0.3275	0.7756
	2961			linoleoyl-arachidonoyl-glycerol (18:2/20:4) [2]*	LC/MS pos late	54956		HMDB0007257	9543796					1.43	0.86	1.42	1.21	1.54	0.6	0.99	0.84	1.07	1.65	1.41	1.79	0.85	1.08	1.27		0.5351	0.2291	0.0197	0.0146	0.9707	0.7081	0.1308	0.1477	0.6566	0.5873	0.448	0.2866	0.8622	0.4048	0.1096	0.1598	0.0537	0.0817	0.4409	0.7971
	2964			linoleoyl-docosahexaenoyl-glycerol (18:2/22:6) [1]*	LC/MS pos late	54949		HMDB0007266	9543899					1.63	0.8	1.23	1.5	1.36	0.49	0.75	0.92	0.84	1.54	1.88	1.71	1.22	1.11	0.91		0.2757	0.1551	0.2276	0.0943	0.4532	0.6261	0.1457	0.1572	0.5743	0.5525	0.7298	0.3979	0.2658	0.2211	0.3986	0.3483	0.0473	0.0759	0.2622	0.7483
	3019		Sphingolipid Synthesis	sphinganine	LC/MS pos late	17769	C00836	HMDB0000269	3126					0.93	0.51	1.48	0.77	0.96	0.55	1.58	0.83	1.03	2.9	1.51	1.88	0.52	0.65	1.24		0.4968	0.2226	0.0594	0.034	0.1767	0.6099	0.9549	0.4954	0.049	0.2368	0.5508	0.3273	0.3125	0.2401	0.7287	0.4754	0.0433	0.0716	0.589	0.8156
	3020			sphinganine-1-phosphate	LC/MS pos late	52605		HMDB0001383	520					1.55	0.78	0.94	0.66	0.8	0.51	0.6	0.43	0.51	1.19	0.84	1.02	0.7	0.85	1.21		0.0166	0.05	0.1186	0.0578	0.709	0.6492	0.1397	0.1534	0.2476	0.4096	0.8054	0.4242	0.1421	0.1599	0.2501	0.2655	0.0109	0.0314	0.0872	0.6076
	3021			sphingadienine	LC/MS pos late	57426			6449795					0.74	0.66	0.7	0.43	0.84	0.89	0.95	0.59	1.13	1.07	0.66	1.27	0.62	1.19	1.93		0.2359	0.143	0.7773	0.2415	0.4181	0.6261	0.4562	0.3114	0.4243	0.5045	0.4907	0.3002	0.0389	0.1046	0.3203	0.3073	0.9565	0.4487	0.9549	0.8541
	3028		Dihydroceramides	N-palmitoyl-sphinganine (d18:0/16:0)	LC/MS pos late	52604		HMDB11760	5283572					3.58	0.8	4.3	0.94	3.59	0.22	1.2	0.26	1	5.38	1.17	4.49	0.22	0.83	3.83		0.9827	0.3448	4.2153e-10	7.9693e-09	0.8567	0.6813	4.6203e-05	0.0007	0.6282	0.5766	2.3086e-05	0.0007	0.9028	0.4183	5.3421e-05	0.001	1.0443e-05	0.0002	0.8204	0.8407
	3030			N-palmitoyl-phytosphingosine (t18:0/16:0)	LC/MS pos late	62881		HMDB0010697	10506988					3.98	0.83	3.99	1.04	3.05	0.21	1	0.26	0.77	4.82	1.25	3.68	0.26	0.76	2.94		0.8138	0.3037	9.4632e-11	2.783e-09	0.5195	0.6261	2.7822e-06	9.1346e-05	0.5762	0.5525	7.713e-06	0.0004	0.7303	0.3681	4.8733e-05	0.0009	4.9031e-07	2.2974e-05	0.7421	0.8407
	3040		Ceramides	N-palmitoyl-sphingosine (d18:1/16:0)	LC/MS pos late	44877		HMDB0004949	5283564					1.88	1.06	2.16	0.79	1.62	0.57	1.15	0.42	0.87	2.04	0.75	1.53	0.37	0.75	2.05		0.2934	0.1606	2.5367e-06	1.0829e-05	0.9897	0.7119	0.0035	0.015	0.7503	0.6088	0.0008	0.0057	0.4664	0.2918	0.0182	0.0511	0.0081	0.0262	0.604	0.8166
	3044			N-stearoyl-sphingosine (d18:1/18:0)*	LC/MS pos late	54979		HMDB0004950	5283565					2.62	1.53	3.58	0.97	3.06	0.59	1.37	0.37	1.17	2.33	0.63	2	0.27	0.86	3.16		0.0981	0.0921	1.5063e-07	1.0492e-06	0.8577	0.6813	0.0003	0.003	0.096	0.3086	1.4633e-05	0.0005	0.9891	0.4387	0.0003	0.0033	0.0309	0.0575	0.2996	0.7597
	3069			ceramide (d18:1/20:0, d16:1/22:0, d20:1/18:0)*	LC/MS pos late	57440		HMDB0240684 HMDB0004951 HMDB0240682						1.18	1.62	4.65	0.65	1.69	1.38	3.95	0.55	1.44	2.86	0.4	1.04	0.14	0.36	2.59		0.0472	0.0724	0.0458	0.0281	0.334	0.6211	0.9587	0.4957	0.5635	0.5505	0.0095	0.0261	0.5897	0.3267	0.4118	0.3507	0.5988	0.3469	0.0109	0.3345
	3070			ceramide (d16:1/24:1, d18:1/22:1)*	LC/MS pos late	57437								0.68	2.37	1.6	0.72	1.01	3.5	2.35	1.06	1.48	0.67	0.3	0.42	0.45	0.63	1.4		0.066	0.0821	0.2296	0.0948	0.5183	0.6261	0.9244	0.4876	0.297	0.4489	0.1573	0.1414	0.2289	0.2048	0.6833	0.4585	0.3422	0.2536	0.1859	0.7154
	3071			ceramide (d18:2/24:1, d18:1/24:2)*	LC/MS pos late	57443		HMDB0240679 HMDB0240680						0.62	0.91	1.17	0.74	0.89	1.47	1.9	1.19	1.44	1.29	0.81	0.98	0.63	0.76	1.21		0.6481	0.2616	0.7049	0.2273	0.0842	0.6099	0.1189	0.1377	0.3692	0.4921	0.5281	0.3168	0.4177	0.2751	0.9147	0.5289	0.4959	0.3145	0.0318	0.4708
	3077		Hexosylceramides (HCER)	glycosyl-N-palmitoyl-sphingosine (d18:1/16:0)	LC/MS pos late	53013								1.05	1.04	1.09	0.63	1	0.99	1.03	0.6	0.95	1.04	0.6	0.95	0.58	0.92	1.58		0.0525	0.0741	0.0343	0.0225	0.2757	0.6099	0.4237	0.2975	0.6313	0.577	0.3738	0.254	0.029	0.1002	0.7569	0.4857	0.7469	0.3903	0.9278	0.8477
	3078			glycosyl-N-stearoyl-sphingosine (d18:1/18:0)	LC/MS pos late	52234								1.4	1.28	1.71	0.71	1.63	0.91	1.22	0.5	1.16	1.34	0.55	1.28	0.41	0.95	2.31		0.0786	0.085	0.0004	0.0006	0.343	0.6211	0.0418	0.0688	0.1377	0.3453	0.0076	0.0232	0.2633	0.2203	0.0304	0.0699	0.557	0.3341	0.4793	0.7971
	3088			glycosyl-N-behenoyl-sphingadienine (d18:2/22:0)*	LC/MS pos late	57421								2.87	0.76	2.7	0.18	2.04	0.26	0.94	0.06	0.71	3.57	0.24	2.7	0.07	0.76	11.31		0.1258	0.1064	1.0445e-06	5.421e-06	0.8204	0.6731	0.0037	0.0153	0.4671	0.5133	0.0207	0.0415	0.0682	0.1162	0.0507	0.0985	0.0005	0.0037	0.4972	0.8015
	3098			glycosyl ceramide (d18:1/20:0, d16:1/22:0)*	LC/MS pos late	57595								1.94	1.73	2.12	0.57	2	0.9	1.1	0.29	1.03	1.23	0.33	1.15	0.27	0.94	3.53		0.0597	0.0785	0.0002	0.0003	0.2161	0.6099	0.0273	0.0503	0.1992	0.3758	0.0158	0.0352	0.0987	0.1344	0.0478	0.0947	0.3277	0.2481	0.818	0.8407
	3101			glycosyl ceramide (d18:1/23:1, d17:1/24:1)*	LC/MS pos late	57448								1.04	1.31	1.39	0.45	1.03	1.25	1.33	0.43	0.98	1.06	0.35	0.79	0.33	0.74	2.27		0.0887	0.089	0.0123	0.0101	0.2864	0.6099	0.3161	0.2554	0.3787	0.4921	0.1148	0.1172	0.0855	0.1276	0.2973	0.2967	0.901	0.4382	0.5525	0.8156
	3102			glycosyl ceramide (d18:2/24:1, d18:1/24:2)*	LC/MS pos late	57453								0.77	1.05	0.87	0.7	0.75	1.37	1.13	0.91	0.97	0.82	0.66	0.71	0.8	0.86	1.07		0.0913	0.0891	0.4497	0.1628	0.3922	0.6261	0.3025	0.248	0.619	0.5717	0.6443	0.3646	0.0653	0.1162	0.2335	0.2556	0.1304	0.144	0.5652	0.8156
	3107		Lactosylceramides (LCER)	lactosyl-N-palmitoyl-sphingosine (d18:1/16:0)	LC/MS pos late	53010		HMDB0006750	53477895					1.24	1.06	1.54	0.79	1.22	0.86	1.25	0.64	0.99	1.45	0.75	1.15	0.51	0.79	1.54		0.1141	0.1008	0.0033	0.0036	0.8156	0.6721	0.2025	0.1948	0.7442	0.6088	0.0183	0.0381	0.2706	0.2223	0.3835	0.343	0.3389	0.2525	0.2479	0.7483
	3118		Dihydrosphingomyelins	myristoyl dihydrosphingomyelin (d18:0/14:0)*	LC/MS pos late	57365		HMDB0012085	44260138					1.17	0.81	1.4	0.58	1.25	0.69	1.2	0.5	1.06	1.74	0.72	1.55	0.42	0.89	2.14		0.555	0.2349	0.0012	0.0016	0.2913	0.6099	0.4164	0.2957	0.4809	0.5187	0.1469	0.135	0.0798	0.1241	0.2158	0.2463	0.1337	0.1459	0.5132	0.8015
	3119			palmitoyl dihydrosphingomyelin (d18:0/16:0)*	LC/MS pos late	52434		HMDB0010168	9939965					1.4	0.92	1.28	0.9	1.36	0.66	0.91	0.64	0.97	1.4	0.98	1.48	0.7	1.06	1.52		0.4401	0.2084	8.5603e-08	6.664e-07	0.8027	0.6705	0.0007	0.0051	0.4654	0.5133	0.0098	0.0265	0.319	0.2401	0.0018	0.0105	7.5401e-05	0.001	0.3235	0.7731
	3120			behenoyl dihydrosphingomyelin (d18:0/22:0)*	LC/MS pos late	57331		HMDB0012091	44260132					2.18	1.17	1.99	0.6	1.96	0.54	0.91	0.28	0.9	1.7	0.52	1.68	0.3	0.99	3.25		0.204	0.1306	5.1109e-05	0.0001	0.5918	0.6348	0.0092	0.0265	0.6618	0.5878	0.0261	0.0484	0.1695	0.1753	0.0619	0.1121	0.0266	0.0519	0.6676	0.8292
	3121			sphingomyelin (d18:0/18:0, d19:0/17:0)*	LC/MS pos late	57473		HMDB0012087	44260130					2.86	1	3.11	1.16	2.75	0.35	1.09	0.41	0.96	3.12	1.17	2.76	0.37	0.88	2.36		0.9751	0.3437	3.38e-13	2.2374e-11	0.6337	0.6447	6.555e-08	7.5324e-06	0.9776	0.6763	4.7124e-08	1.0263e-05	0.4725	0.2938	2.2829e-07	1.902e-05	7.1431e-08	7.5307e-06	0.914	0.8455
	3122			sphingomyelin (d18:0/20:0, d16:0/22:0)*	LC/MS pos late	57476		HMDB0012090						2.37	1.17	2.56	0.78	2.48	0.49	1.08	0.33	1.04	2.2	0.67	2.12	0.3	0.97	3.18		0.4846	0.2202	1.4788e-06	7.2485e-06	0.8777	0.684	0.0017	0.0095	0.5536	0.5465	0.0012	0.0069	0.5415	0.3127	0.0045	0.0205	0.0084	0.0267	0.8887	0.8419
	3123		Sphingomyelins	palmitoyl sphingomyelin (d18:1/16:0)	LC/MS pos late	37506		HMDB0010169	9939941					1.28	1	1.26	0.95	1.23	0.78	0.98	0.74	0.96	1.26	0.96	1.23	0.76	0.98	1.29		0.6078	0.2512	1.2254e-07	8.7656e-07	0.9632	0.7081	0.0004	0.0034	0.9172	0.6581	0.0014	0.0078	0.4804	0.2973	0.0029	0.0148	0.0003	0.0026	0.6694	0.8294
	3124			hydroxypalmitoyl sphingomyelin (d18:1/16:0(OH))**	LC/MS pos late	62851								1.13	0.84	0.98	0.99	1.04	0.74	0.87	0.87	0.92	1.17	1.17	1.24	1	1.06	1.06		0.2201	0.1365	0.072	0.0398	0.8639	0.6818	0.2625	0.2294	0.1716	0.3647	0.9841	0.4766	0.7132	0.3631	0.7757	0.4902	0.0158	0.0394	0.2709	0.7483
	3125			stearoyl sphingomyelin (d18:1/18:0)	LC/MS pos late	19503	C00550	HMDB0001348	6453725					1.28	0.99	1.25	1.28	1.4	0.77	0.97	1	1.09	1.27	1.3	1.42	1.02	1.12	1.09		0.101	0.0928	0.011	0.0093	0.6451	0.6447	0.0509	0.079	0.8793	0.6518	0.1005	0.1101	0.0751	0.1188	0.0128	0.0422	0.0365	0.0657	0.7405	0.8407
	3126			behenoyl sphingomyelin (d18:1/22:0)*	LC/MS pos late	48492		HMDB0012103	44260125					2.63	1.23	2.37	0.51	2.09	0.47	0.9	0.19	0.79	1.92	0.41	1.69	0.21	0.88	4.11		0.1542	0.1143	1.1408e-05	3.871e-05	0.3993	0.6261	0.0026	0.0123	0.518	0.5383	0.0168	0.0365	0.1479	0.1642	0.0309	0.0705	0.014	0.0375	0.4704	0.7971
	3127			tricosanoyl sphingomyelin (d18:1/23:0)*	LC/MS pos late	52436		HMDB0012105						1.35	1.05	1.35	0.56	1.07	0.78	1.01	0.41	0.79	1.29	0.53	1.01	0.41	0.79	1.91		0.0398	0.0685	0.0026	0.003	0.575	0.6314	0.0845	0.111	0.7069	0.5974	0.1312	0.1267	0.0498	0.1139	0.5347	0.4075	0.1715	0.1693	0.8195	0.8407
	3128			lignoceroyl sphingomyelin (d18:1/24:0)	LC/MS pos late	57330		HMDB0011697						1.05	1.02	1.13	0.63	0.83	0.97	1.08	0.6	0.79	1.11	0.62	0.81	0.56	0.73	1.31		0.1039	0.0953	0.168	0.0747	0.9319	0.7011	0.4456	0.3086	0.7729	0.6145	0.3953	0.2655	0.1693	0.1753	0.7611	0.4872	0.6338	0.3564	0.9295	0.8477
	3129			sphingomyelin (d18:2/18:1)*	LC/MS pos late	57474		HMDB0001348	52931155					1.82	1.14	1.83	0.88	1.64	0.62	1.01	0.48	0.9	1.61	0.77	1.44	0.48	0.89	1.87		0.2796	0.1561	3.6426e-06	1.4608e-05	0.7719	0.6585	0.0013	0.0079	0.4599	0.511	0.0021	0.0098	0.4374	0.2816	0.0125	0.0414	0.0096	0.0288	0.8668	0.8419
	3130			sphingomyelin (d18:2/23:1)*	LC/MS pos late	57482		HMDB0240668						1.59	1.02	1.75	0.82	1.37	0.64	1.1	0.51	0.86	1.72	0.8	1.34	0.47	0.78	1.67		0.2493	0.1457	9.563e-06	3.3304e-05	0.9936	0.712	0.0067	0.0216	0.9101	0.6574	0.0034	0.0138	0.3209	0.2401	0.0518	0.099	0.0089	0.0269	0.8025	0.8407
	3131			sphingomyelin (d18:2/24:2)*	LC/MS pos late	57479		HMDB0240644						0.96	0.74	0.94	1.13	0.9	0.77	0.98	1.18	0.94	1.27	1.52	1.22	1.2	0.96	0.8		0.0286	0.0602	0.8908	0.2665	0.0257	0.6099	0.7168	0.421	0.0086	0.1495	0.479	0.2958	0.2966	0.2364	0.386	0.3434	0.0211	0.0456	0.7285	0.8407
	3132			sphingomyelin (d17:1/14:0, d16:1/15:0)*	LC/MS pos late	62152								1.77	1.2	1.8	0.63	1.28	0.68	1.01	0.36	0.72	1.5	0.53	1.07	0.35	0.71	2.02		0.0291	0.0603	6.9409e-05	0.0002	0.5549	0.6261	0.0056	0.0193	0.3229	0.4677	0.0102	0.0271	0.1229	0.1492	0.1298	0.1744	0.0595	0.0865	0.8134	0.8407
	3133			sphingomyelin (d18:1/14:0, d16:1/16:0)*	LC/MS pos late	42463		HMDB0012097	11433862					1.51	1.09	1.63	0.73	1.21	0.72	1.08	0.48	0.81	1.5	0.67	1.12	0.45	0.74	1.67		0.0244	0.0577	2.3472e-05	6.6093e-05	0.8841	0.6846	0.0085	0.025	0.6183	0.5717	0.0054	0.0195	0.0881	0.1297	0.1672	0.21	0.0285	0.0547	0.8596	0.8419
	3134			sphingomyelin (d18:2/14:0, d18:1/14:1)*	LC/MS pos late	47154		HMDB0240637 HMDB0240612						1.69	1.53	1.94	0.96	1.4	0.9	1.15	0.57	0.83	1.27	0.63	0.92	0.49	0.72	1.47		0.0454	0.0724	0.0024	0.0028	0.6443	0.6447	0.0185	0.0392	0.0655	0.2693	0.0042	0.0162	0.7434	0.3695	0.097	0.1497	0.5741	0.34	0.5585	0.8156
	3135			sphingomyelin (d17:1/16:0, d18:1/15:0, d16:1/17:0)*	LC/MS pos late	52433		HMDB0240608 HMDB0240617						1.72	0.99	1.65	0.76	1.39	0.57	0.96	0.44	0.81	1.68	0.77	1.41	0.46	0.84	1.84		0.0423	0.07	3.9915e-08	3.643e-07	0.8809	0.6846	0.0003	0.0028	0.8139	0.628	0.0016	0.0083	0.0578	0.1139	0.0214	0.0573	0.0002	0.0016	0.5651	0.8156
	3136			sphingomyelin (d17:2/16:0, d18:2/15:0)*	LC/MS pos late	57483		HMDB0240677						1.93	0.63	1.66	0.62	1.02	0.33	0.86	0.32	0.53	2.63	0.98	1.62	0.37	0.62	1.65		0.0181	0.0514	0.0002	0.0004	0.4256	0.6261	0.0105	0.0277	0.1701	0.3647	0.0913	0.1036	0.1598	0.1717	0.9259	0.5314	0.0002	0.0021	0.3412	0.7892
	3137			sphingomyelin (d18:2/16:0, d18:1/16:1)*	LC/MS pos late	42459		HMDB0240613 HMDB0240638						1.68	1.12	1.62	0.79	1.47	0.67	0.96	0.47	0.88	1.44	0.7	1.31	0.49	0.91	1.87		0.2423	0.1438	1.9112e-05	5.4985e-05	0.654	0.6447	0.0049	0.0177	0.5478	0.5442	0.0098	0.0265	0.2541	0.2149	0.0312	0.0705	0.022	0.0461	0.7856	0.8407
	3138			sphingomyelin (d18:1/17:0, d17:1/18:0, d19:1/16:0)	LC/MS pos late	52615		HMDB0240609 HMDB0240622 HMDB0240620	46891763					2.19	1.02	2.02	0.91	1.87	0.46	0.92	0.42	0.85	1.99	0.9	1.84	0.45	0.93	2.06		0.403	0.197	1.9974e-11	8.8113e-10	0.7732	0.6585	5.6038e-07	3.2197e-05	0.8371	0.6368	6.5717e-06	0.0004	0.5339	0.3115	2.6785e-05	0.0006	1.0596e-06	3.4373e-05	0.4289	0.7971
	3139			sphingomyelin (d18:1/18:1, d18:2/18:0)	LC/MS pos late	37529		HMDB0012101	6443882					1.95	1.05	1.98	1	1.73	0.54	1.01	0.51	0.89	1.87	0.94	1.64	0.5	0.88	1.74		0.544	0.2322	2.4973e-10	5.0845e-09	0.8359	0.6773	3.8101e-06	0.0001	0.6807	0.5904	4.8907e-06	0.0004	0.8735	0.408	8.1379e-05	0.0012	1.3612e-05	0.0002	0.9357	0.8491
	3140			sphingomyelin (d18:1/19:0, d19:1/18:0)*	LC/MS pos late	57475								3.22	1.27	3.19	0.78	2.71	0.39	0.99	0.24	0.84	2.51	0.62	2.14	0.24	0.85	3.47		0.2061	0.1316	2.3206e-09	3.2472e-08	0.4873	0.6261	1.6339e-05	0.0003	0.3853	0.4921	7.987e-05	0.0013	0.2837	0.2298	0.0003	0.0032	0.0002	0.0021	0.6036	0.8166
	3141			sphingomyelin (d18:1/20:0, d16:1/22:0)*	LC/MS pos late	48490		HMDB0012102	44260124					2.44	1.28	2.22	0.76	2.15	0.52	0.91	0.31	0.88	1.74	0.6	1.68	0.34	0.97	2.81		0.3161	0.167	3.7645e-06	1.4871e-05	0.4694	0.6261	0.0011	0.0071	0.4416	0.5051	0.006	0.0204	0.321	0.2401	0.0094	0.0348	0.0087	0.0269	0.5299	0.8015
	3142			sphingomyelin (d18:1/20:1, d18:2/20:0)*	LC/MS pos late	48491		HMDB0240610 HMDB0240632						1.95	1.09	2.08	0.98	1.84	0.56	1.07	0.5	0.94	1.91	0.9	1.69	0.47	0.88	1.88		0.9602	0.3396	4.9139e-05	0.0001	0.9649	0.7081	0.0084	0.025	0.9533	0.6692	0.017	0.0365	0.857	0.4036	0.0145	0.0458	0.0097	0.0289	0.7762	0.8407
	3144			sphingomyelin (d18:1/21:0, d17:1/22:0, d16:1/23:0)*	LC/MS pos late	52495		HMDB0240621 HMDB0240611 HMDB0240619						4.09	1.27	3.88	0.52	2.94	0.31	0.95	0.13	0.72	3.06	0.41	2.32	0.13	0.76	5.68		0.0941	0.0899	6.3635e-08	5.6143e-07	0.414	0.6261	0.0001	0.0015	0.5583	0.5492	0.0016	0.0083	0.1185	0.1482	0.0047	0.0211	0.0007	0.0049	0.3871	0.7971
	3145			sphingomyelin (d18:2/21:0, d16:2/23:0)*	LC/MS pos late	57480		HMDB0240676						2.27	1.68	2.62	0.58	1.81	0.74	1.16	0.26	0.8	1.56	0.35	1.07	0.22	0.69	3.1		0.0704	0.0828	3.6593e-05	9.4956e-05	0.457	0.6261	0.0121	0.0299	0.3665	0.4921	0.0086	0.0246	0.1113	0.1447	0.0514	0.0988	0.0925	0.1147	0.8938	0.8419
	3146			sphingomyelin (d18:1/22:1, d18:2/22:0, d16:1/24:1)*	LC/MS pos late	48493		HMDB0012104						1.74	1.42	1.76	0.63	1.44	0.82	1.01	0.36	0.83	1.24	0.44	1.01	0.36	0.82	2.28		0.0764	0.0846	0.0004	0.0006	0.3751	0.6231	0.0203	0.0416	0.2735	0.4272	0.0286	0.0511	0.1427	0.1601	0.107	0.1581	0.1964	0.1847	0.883	0.8419
	3147			sphingomyelin (d18:1/22:2, d18:2/22:1, d16:1/24:2)*	LC/MS pos late	57477		HMDB0240672 HMDB0240670 HMDB0240669						1.34	1.56	1.65	0.77	1.25	1.16	1.23	0.57	0.93	1.06	0.49	0.8	0.46	0.76	1.64		0.0774	0.0846	0.0116	0.0097	0.4735	0.6261	0.148	0.1585	0.184	0.365	0.0481	0.0694	0.2502	0.2135	0.2132	0.2444	0.9022	0.4383	0.5738	0.8156
	3148			sphingomyelin (d18:2/23:0, d18:1/23:1, d17:1/24:1)*	LC/MS pos late	52435		HMDB0240634 HMDB0011696 HMDB0240614	134757653					1.43	1.11	1.49	0.7	1.24	0.78	1.04	0.49	0.87	1.34	0.63	1.11	0.47	0.83	1.77		0.0591	0.0781	0.0001	0.0002	0.5465	0.6261	0.0266	0.0496	0.5812	0.5525	0.0237	0.0457	0.0715	0.1162	0.1459	0.1889	0.0875	0.1112	0.9615	0.8558
	3149			sphingomyelin (d18:1/24:1, d18:2/24:0)*	LC/MS pos late	47153		HMDB0012107	44260126					0.89	1.09	0.97	0.72	0.89	1.23	1.09	0.82	1	0.89	0.66	0.81	0.74	0.91	1.23		0.0745	0.0846	0.7013	0.2269	0.276	0.6099	0.7545	0.4351	0.4296	0.5048	0.8161	0.4274	0.0628	0.1162	0.7131	0.4691	0.2726	0.2241	0.5861	0.8156
	3150			sphingomyelin (d18:2/24:1, d18:1/24:2)*	LC/MS pos late	52437		HMDB0240636 HMDB0240615	85336023					0.95	1.01	1.03	0.85	0.91	1.07	1.09	0.9	0.96	1.02	0.84	0.9	0.82	0.88	1.07		0.2157	0.1347	0.689	0.2232	0.8134	0.6721	0.8121	0.4525	0.8585	0.6425	0.6569	0.3692	0.2131	0.1971	0.5539	0.4132	0.6777	0.3741	0.4963	0.8015
	3151			sphingomyelin (d18:1/25:0, d19:0/24:1, d20:1/23:0, d19:1/24:0)*	LC/MS pos late	57478		HMDB0240671 HMDB0240675 HMDB0240673 HMDB0240674						0.97	0.88	0.85	0.51	0.75	0.91	0.87	0.53	0.77	0.96	0.58	0.85	0.6	0.88	1.47		0.0896	0.089	0.2107	0.0889	0.6022	0.638	0.4844	0.3245	0.9975	0.6772	0.9709	0.4738	0.0644	0.1162	0.6618	0.4517	0.4863	0.3093	0.5072	0.8015
	3154		Ceramide PEs	palmitoyl-sphingosine-phosphoethanolamine (d18:1/16:0)	LC/MS pos late	62984								1.52	0.9	1.14	1.34	1.43	0.6	0.75	0.89	0.94	1.26	1.49	1.59	1.18	1.26	1.07		0.0135	0.0471	0.0065	0.006	0.2826	0.6099	0.0058	0.0197	0.5201	0.5383	0.4747	0.2952	0.072	0.1162	0.0149	0.0465	0.001	0.0062	0.0335	0.4708
	3179		Sphingosines	sphingosine	LC/MS pos late	17747	C00319	HMDB0000252	5280335					0.91	0.46	1.08	0.65	1.07	0.5	1.18	0.71	1.17	2.36	1.42	2.35	0.6	1	1.65		0.2921	0.1604	0.0382	0.0245	0.1535	0.6099	0.9499	0.4939	0.0173	0.1809	0.8162	0.4274	0.1908	0.1874	0.7864	0.4915	0.0201	0.0448	0.7678	0.8407
	3181			sphingosine 1-phosphate	LC/MS pos late	34445	C06124	HMDB0000277	5283560					1.37	0.78	0.94	0.62	0.88	0.57	0.68	0.45	0.64	1.2	0.8	1.13	0.66	0.94	1.41		0.0075	0.0423	0.0135	0.0108	0.9087	0.6924	0.079	0.1048	0.2273	0.3975	0.968	0.4738	0.0357	0.1031	0.503	0.3927	0.0044	0.017	0.0728	0.5633
	3187			hexadecasphingosine (d16:1)*	LC/MS pos late	57428			14767871					1.04	0.85	1.57	0.87	1.3	0.81	1.51	0.84	1.25	1.85	1.03	1.53	0.55	0.83	1.49		0.8847	0.3226	0.0179	0.0135	0.2954	0.6099	0.8017	0.4492	0.4046	0.4924	0.1084	0.1152	0.4878	0.2989	0.3996	0.3483	0.2802	0.2277	0.1721	0.693
	3195		Mevalonate Metabolism	3-hydroxy-3-methylglutarate	LC/MS polar	531	C03761	HMDB0000355	1662;5459993					1.18	0.7	1.06	0.89	1.23	0.59	0.9	0.76	1.04	1.52	1.27	1.76	0.84	1.16	1.38		0.0559	0.0754	0.0005	0.0008	0.5248	0.6261	0.2062	0.197	0.0217	0.1932	0.682	0.3804	0.3975	0.267	0.1047	0.1563	0.0007	0.005	0.3878	0.7971
	3197			mevalonate	LC/MS polar	39583	C02104	HMDB0000227	449					1.25	0.83	0.87	1.03	1.44	0.66	0.69	0.82	1.15	1.05	1.25	1.74	1.19	1.66	1.39		0.0001	0.0106	0.0038	0.004	0.1374	0.6099	0.0465	0.0734	0.0928	0.3086	0.1412	0.1309	0.9553	0.4294	0.0034	0.0163	0.0006	0.0042	0.001	0.1649
	3198			mevalonolactone	LC/MS pos early	48118		HMDB0006024	10428					1.37	1.05	1	1.11	1.38	0.77	0.73	0.81	1.01	0.96	1.06	1.31	1.11	1.38	1.24		0.4545	0.2124	0.1023	0.0513	0.2466	0.6099	0.0917	0.1157	0.7237	0.6034	0.9471	0.4698	0.8652	0.4055	0.086	0.1374	0.1772	0.1713	0.0803	0.592
	3212		Sterol	cholesterol	LC/MS pos late	63	C00187	HMDB0000067	6432564;11025495;5997					1.28	1.12	1.46	0.65	1.1	0.87	1.14	0.51	0.86	1.31	0.58	0.99	0.45	0.76	1.7		0.0467	0.0724	0.0036	0.0039	0.7985	0.6689	0.104	0.1267	0.4924	0.5246	0.0437	0.0662	0.1287	0.1529	0.4479	0.3659	0.3363	0.2514	0.6753	0.8322
	3213			cholesterol sulfate	LC/MS polar	35324	C18043	HMDB00653	65076					1.15	0.98	1.21	0.81	1.04	0.86	1.05	0.71	0.9	1.22	0.83	1.05	0.67	0.86	1.28		0.0638	0.0809	0.0038	0.004	0.7609	0.6585	0.1953	0.1903	0.9184	0.6581	0.1218	0.1217	0.0567	0.1139	0.702	0.4672	0.1634	0.1633	0.7924	0.8407
	3226			7alpha-hydroxy-3-oxo-4-cholestenoate (7-Hoca)	LC/MS neg	36776	C17337	HMDB0012458	3081085					1.11	1.01	0.78	1.84	1.19	0.91	0.7	1.66	1.07	0.77	1.81	1.17	2.37	1.53	0.65		0.0087	0.0443	0.8402	0.2574	0.2828	0.6099	0.3521	0.2762	0.6128	0.5711	0.6373	0.3635	0.0175	0.0882	0.2537	0.2681	0.1548	0.1577	0.1647	0.6879
	3229			3beta-hydroxy-5-cholestenoate	LC/MS neg	54805	C17333	HMDB0012453	165511					1.05	1.04	0.92	1.25	1.31	0.99	0.87	1.19	1.24	0.88	1.21	1.26	1.37	1.42	1.04		0.1221	0.105	0.5807	0.1941	0.7029	0.6489	0.3839	0.2845	0.6543	0.5867	0.885	0.4479	0.1524	0.1672	0.0722	0.1215	0.6698	0.3714	0.4666	0.7971
	3239			4-cholesten-3-one	LC/MS pos late	38125	C00599	HMDB0000921	91477					0.99	1.1	1.25	1.01	1.05	1.12	1.27	1.03	1.06	1.14	0.92	0.95	0.81	0.84	1.03		0.2755	0.1551	0.7357	0.2337	0.967	0.7081	0.9296	0.4877	0.3343	0.4763	0.1741	0.1512	0.697	0.3587	0.631	0.4412	0.3796	0.2677	0.2026	0.7154
	3244			campesterol	LC/MS pos late	33997	C01789	HMDB0002869	173183					0.07	1.48	0.25	0.59	0.1	20.06	3.37	7.96	1.37	0.17	0.4	0.07	2.36	0.41	0.17		0.2534	0.1471	5.5357e-06	2.0636e-05	0.6695	0.6447	0.0009	0.0063	0.5505	0.5449	0.0119	0.0296	0.3184	0.2401	0.0018	0.0103	0.0002	0.0016	0.3447	0.7908
	3317		Corticosteroids	corticosterone	LC/MS neg	5983	C02140	HMDB0001547	5753					1.04	1.28	1.43	0.88	1.18	1.23	1.37	0.84	1.13	1.11	0.68	0.92	0.62	0.83	1.34		0.0324	0.0628	0.093	0.0479	0.3818	0.6241	0.7144	0.421	0.1488	0.3528	0.0587	0.0787	0.2533	0.2147	0.3327	0.3132	0.2757	0.2254	0.122	0.6579
	3473		Primary Bile Acid Metabolism	cholate	LC/MS neg	22842	C00695	HMDB0000619	221493					0.18	0.33	0.11	1.06	0.48	1.88	0.63	5.96	2.73	0.34	3.18	1.46	9.45	4.33	0.46		0.0187	0.0516	0.0436	0.0272	0.8418	0.6778	0.1018	0.1251	0.2047	0.3827	0.0354	0.0587	0.3799	0.2631	0.8737	0.5156	0.7006	0.3778	0.6158	0.8166
	3474			glycocholate	LC/MS neg	18476	C01921	HMDB0000138	10140					0.41	0.6	0.2	2.22	0.62	1.49	0.5	5.44	1.53	0.34	3.66	1.03	10.92	3.07	0.28		0.0469	0.0724	0.0175	0.0132	0.8225	0.6731	0.1515	0.1601	0.2364	0.4029	0.0354	0.0587	0.2946	0.2363	0.4268	0.3586	0.7953	0.4061	0.4757	0.7971
	3475			taurocholate	LC/MS neg	18497	C05122	HMDB0000036	46783527;6675					0.49	0.62	0.46	1.49	0.63	1.29	0.94	3.08	1.3	0.73	2.39	1.01	3.27	1.38	0.42		0.0401	0.0685	0.3595	0.1371	0.6974	0.6485	0.6529	0.3975	0.2173	0.3922	0.2253	0.1774	0.2314	0.2057	0.9673	0.5435	0.4277	0.2871	0.4404	0.7971
	3476			chenodeoxycholate	LC/MS neg	1563	C02528	HMDB0000518	10133					0.51	0.81	0.5	1.43	0.65	1.58	0.98	2.77	1.26	0.62	1.76	0.8	2.83	1.29	0.45		0.2032	0.1305	0.0812	0.0431	0.675	0.6447	0.3509	0.2757	0.3749	0.4921	0.1841	0.1573	0.3156	0.2401	0.4953	0.3894	0.9629	0.4502	0.685	0.8388
	3482			taurochenodeoxycholate	LC/MS neg	18494	C05465	HMDB0000951	387316					0.62	0.66	0.5	2.61	1.07	1.06	0.8	4.18	1.71	0.76	3.94	1.61	5.2	2.13	0.41		0.0069	0.0423	0.3424	0.1315	0.5959	0.6371	0.6722	0.405	0.1166	0.3316	0.1394	0.1308	0.1431	0.1601	0.8729	0.5156	0.2452	0.2134	0.2851	0.7483
	3483			beta-muricholate	LC/MS neg	31885	C17726	HMDB0000415	5283853					0.27	0.4	0.22	1.1	0.49	1.49	0.83	4.08	1.82	0.56	2.74	1.23	4.93	2.2	0.45		0.0262	0.059	0.1574	0.0717	0.7896	0.6672	0.246	0.2204	0.1783	0.3647	0.1079	0.1152	0.315	0.2401	0.9789	0.5435	0.8477	0.4236	0.6418	0.8257
	3484			alpha-muricholate	LC/MS neg	34092	C17647	HMDB0000506	53477700					0.3	0.3	0.12	1.68	0.73	0.99	0.4	5.66	2.47	0.4	5.69	2.49	14.1	6.16	0.44		0.0075	0.0423	0.3136	0.1217	0.9973	0.712	0.5576	0.356	0.1783	0.3647	0.0515	0.0728	0.3573	0.2536	0.6948	0.4637	0.4399	0.2921	0.1635	0.6879
	3486			tauro-beta-muricholate	LC/MS neg	33983		HMDB0000932	121596216;168408;21124703					0.68	0.77	0.67	1.3	1.08	1.13	0.98	1.9	1.57	0.87	1.68	1.39	1.94	1.6	0.83		0.1926	0.1252	0.7433	0.2344	0.9502	0.7039	0.9825	0.5018	0.3167	0.4631	0.4009	0.2655	0.9018	0.4183	0.5839	0.4258	0.3272	0.2481	0.4131	0.7971
	3489			glyco-beta-muricholate**	LC/MS neg	62066								0.44	1.29	0.45	2.62	0.83	2.93	1.02	5.96	1.89	0.35	2.03	0.65	5.83	1.85	0.32		0.0369	0.0671	0.0048	0.0048	0.6609	0.6447	0.125	0.1422	0.7235	0.6034	0.1321	0.1267	0.0532	0.1139	0.6563	0.4511	0.2325	0.206	0.9762	0.8582
	3499		Secondary Bile Acid Metabolism	deoxycholate	LC/MS neg	1114	C04483	HMDB0000626	222528;440355					0.85	0.55	0.73	0.94	0.98	0.64	0.86	1.11	1.15	1.33	1.72	1.78	1.3	1.34	1.04		0.0947	0.09	0.6837	0.2219	0.8609	0.6818	0.8973	0.4778	0.4498	0.5083	0.168	0.1485	0.5956	0.3286	0.738	0.478	0.3773	0.2673	0.1331	0.6639
	3509			taurodeoxycholate	LC/MS neg	12261	C05463	HMDB0000896	2733768					0.62	0.44	0.46	1.17	0.9	0.7	0.73	1.87	1.44	1.05	2.68	2.07	2.56	1.97	0.77		0.0794	0.085	0.4202	0.1543	0.6424	0.6447	0.6062	0.3771	0.1899	0.3684	0.2725	0.204	0.3373	0.2445	0.8881	0.5205	0.4198	0.2855	0.5561	0.8156
	3513			6beta-hydroxylithocholate	LC/MS neg	36807	C15515	HMDB0000811	5283821					0.43	0.36	0.36	1.1	0.73	0.84	0.84	2.57	1.71	1	3.05	2.03	3.06	2.04	0.67		0.0748	0.0846	0.2913	0.1159	0.6804	0.6461	0.3782	0.2834	0.1342	0.3453	0.1594	0.1423	0.4905	0.2989	0.7197	0.4715	0.5262	0.3258	0.5894	0.8156
	3524			ursodeoxycholate	LC/MS neg	1605	C07880	HMDB0000946	31401					0.32	0.43	0.29	1.2	0.73	1.35	0.9	3.79	2.3	0.67	2.8	1.7	4.19	2.54	0.61		0.0122	0.0471	0.2372	0.0975	0.5909	0.6348	0.2182	0.2038	0.0784	0.2913	0.1018	0.1109	0.3388	0.2445	0.9935	0.5486	0.58	0.3412	0.6729	0.8318
	3538			tauroursodeoxycholate	LC/MS neg	39378		HMDB0000874	9848818					1.15	0.77	1.13	2.44	1.78	0.67	0.98	2.12	1.55	1.47	3.18	2.32	2.16	1.58	0.73		0.0232	0.0566	0.8032	0.2478	0.5871	0.6348	0.7559	0.4354	0.2397	0.4034	0.6813	0.3804	0.1251	0.1509	0.3685	0.3341	0.1401	0.15	0.4718	0.7971
	3545			hyocholate	LC/MS neg	34093	C17649	HMDB0000760	92805					0.08	0.81	0.32	1.29	0.32	10.77	4.17	17.09	4.3	0.39	1.59	0.4	4.09	1.03	0.25		0.2528	0.1471	0.0049	0.0048	0.2317	0.6099	0.0083	0.025	0.3818	0.4921	0.2153	0.1734	0.4438	0.2824	0.2195	0.2493	0.0646	0.0893	0.1347	0.6639
	3548			hyodeoxycholate	LC/MS neg	27531	C15517	HMDB0000733	5283820					0.4	0.25	0.38	0.5	0.48	0.63	0.96	1.25	1.21	1.53	1.99	1.92	1.3	1.25	0.97		0.2566	0.1483	0.2109	0.0889	0.6516	0.6447	0.1544	0.1615	0.1238	0.3388	0.0907	0.1034	0.799	0.3851	0.4033	0.3488	0.9041	0.4383	0.7782	0.8407
	3549			taurohyodeoxycholic acid	LC/MS neg	43588		HMDB0000874	12443252					0.42	0.5	0.37	1.11	1.01	1.2	0.88	2.64	2.41	0.73	2.2	2.01	3	2.74	0.91		0.0672	0.0825	0.2935	0.1161	0.566	0.6278	0.5668	0.3593	0.1513	0.3547	0.1884	0.1587	0.3383	0.2445	0.6744	0.4571	0.3803	0.2678	0.4507	0.7971
	3552			3-dehydrocholate	LC/MS neg	43835		HMDB00502	159655					0.26	0.47	0.25	0.98	0.7	1.79	0.94	3.72	2.67	0.53	2.08	1.49	3.95	2.83	0.72		0.062	0.08	0.6166	0.2043	0.5694	0.6289	0.4169	0.2957	0.1884	0.3681	0.4486	0.2866	0.3353	0.2445	0.7294	0.4754	0.6066	0.349	0.9563	0.8541
	3557			7-ketodeoxycholate	LC/MS neg	31904		HMDB0000391	188292					0.1	0.31	0.07	0.87	0.4	3.28	0.69	9.14	4.17	0.21	2.79	1.27	13.18	6.01	0.46		0.0132	0.0471	0.026	0.018	0.7329	0.6501	0.0613	0.0903	0.1691	0.3647	0.0327	0.0558	0.3164	0.2401	0.8003	0.4945	0.6004	0.3473	0.7733	0.8407
	3566			ursocholate	LC/MS neg	57573	C17644	HMDB0000917	122340					0.18	0.39	0.11	1.67	0.59	2.2	0.62	9.5	3.38	0.28	4.32	1.54	15.21	5.4	0.36		0.0092	0.0443	0.085	0.0449	0.7449	0.6541	0.2066	0.197	0.1258	0.3388	0.0574	0.0776	0.2224	0.2008	0.8864	0.5205	0.7803	0.4	0.5027	0.8015
	4138	Nucleotide	Purine Metabolism, (Hypo)Xanthine/Inosine containing	inosine 5'-monophosphate (IMP)	LC/MS pos early	2133	C00130	HMDB0000175	8582					1.08	1	12.75	4.52	1.07	0.93	11.86	4.21	1	12.75	4.52	1.07	0.35	0.08	0.24		0.6446	0.2609	0.7172	0.2293	0.2849	0.6099	0.8952	0.4778	1	0.6772	0.1736	0.1512	0.315	0.2401	0.897	0.5214	0.8952	0.4374	0.2174	0.7205
	4139			inosine	LC/MS neg	1123	C00294	HMDB0000195	6021					9.66	1.81	5.91	1.1	8.17	0.19	0.61	0.11	0.85	3.27	0.61	4.52	0.19	1.38	7.42		0.9084	0.3275	0.4246	0.1554	0.5276	0.6261	0.8602	0.4668	0.3353	0.4763	0.6953	0.3839	0.6228	0.3371	0.7726	0.4888	0.4294	0.2874	0.5708	0.8156
	4140			hypoxanthine	LC/MS neg	3127	C00262	HMDB0000157	790;135398638					0.64	0.67	1.43	0.88	0.96	1.04	2.22	1.37	1.49	2.14	1.31	1.43	0.62	0.67	1.09		0.6732	0.2667	0.5242	0.1792	0.1696	0.6099	0.4017	0.2921	0.4793	0.5187	0.2654	0.2	0.8698	0.4071	0.9614	0.5412	0.8944	0.4374	0.0554	0.5421
	4141			xanthine	LC/MS neg	3147	C00385	HMDB0000292	1188					0.11	0.3	1.61	0.26	0.5	2.67	14.38	2.28	4.49	5.38	0.86	1.68	0.16	0.31	1.97		0.6043	0.2509	0.4663	0.1671	0.463	0.6261	0.9253	0.4876	0.8795	0.6518	0.203	0.1678	0.9943	0.4393	0.9315	0.5332	0.9539	0.4484	0.1728	0.693
	4143			xanthosine	LC/MS neg	15136	C01762	HMDB0000299	64959					0.31	0.21	1.2	0.43	0.56	0.67	3.85	1.39	1.82	5.75	2.08	2.72	0.36	0.47	1.31		0.6732	0.2667	0.1388	0.0652	0.0009	0.2646	0.0306	0.0545	0.0016	0.068	0.8655	0.443	0.0242	0.0975	0.2918	0.2953	0.2507	0.2134	0.0206	0.4175
	4146			N1-methylinosine	LC/MS pos early	48351		HMDB0002721	650095					1.14	1.06	1.16	0.93	1.31	0.93	1.02	0.82	1.14	1.09	0.88	1.23	0.8	1.12	1.4		0.9235	0.3311	0.0076	0.0069	0.4121	0.6261	0.2568	0.2261	0.7302	0.6058	0.1817	0.1558	0.5466	0.315	0.0408	0.0858	0.4262	0.2871	0.8354	0.8419
	4151			urate	LC/MS neg	1604	C00366	HMDB0000289	1175					0.83	0.64	0.81	0.7	0.78	0.77	0.97	0.84	0.94	1.26	1.09	1.22	0.87	0.97	1.12		0.08	0.085	0.4655	0.1671	0.2653	0.6099	0.3826	0.2845	0.0121	0.1625	0.2154	0.1734	0.0378	0.1046	0.1773	0.2172	0.0872	0.1111	0.7083	0.8407
	4153			allantoin	LC/MS polar	1107	C02350 C02348 C01551	HMDB0000462	204;439714;439713					1.18	1.09	0.99	0.91	1.15	0.92	0.84	0.77	0.98	0.91	0.83	1.06	0.91	1.16	1.27		0.6663	0.2659	0.0597	0.0341	0.0981	0.6099	0.0921	0.1157	0.4551	0.5096	0.9286	0.4632	0.3698	0.2579	0.1719	0.2129	0.3358	0.2514	0.1096	0.6317
	4154			allantoic acid	LC/MS polar	33434	C00499	HMDB0001209	203					1.3	1.24	1.02	0.79	1.1	0.95	0.78	0.6	0.85	0.82	0.63	0.89	0.77	1.08	1.4		0.2463	0.1452	0.2704	0.1084	0.1887	0.6099	0.1879	0.1862	0.3467	0.4859	0.9403	0.4675	0.2454	0.2129	0.7708	0.4888	0.6997	0.3778	0.2133	0.7205
	4159		Purine Metabolism, Adenine containing	adenosine 5'-monophosphate (AMP)	LC/MS pos early	32342	C00020	HMDB0000045	6083					19.85	0.87	122.51	116.57	0.95	0.04	6.17	5.87	0.05	141.5	134.64	1.1	0.95	0.01	0.01		0.9702	0.3424	0.4939	0.1723	0.2948	0.6099	0.3079	0.25	0.8875	0.6545	0.364	0.2503	0.4285	0.2781	0.9223	0.5306	0.247	0.2134	0.9092	0.8437
	4166			adenosine	LC/MS pos early	555	C00212	HMDB0000050	60961					28.99	0.95	2	3.7	2.07	0.03	0.07	0.13	0.07	2.12	3.91	2.19	1.85	1.03	0.56		0.4267	0.2058	0.7239	0.2311	0.0725	0.6099	0.0729	0.0994	0.8952	0.6554	0.8832	0.4478	0.1767	0.1815	0.8945	0.5214	0.0553	0.0834	0.0978	0.6317
	4167			adenine	LC/MS pos early	554	C00147	HMDB0000034	190					1.32	0.98	0.94	1.12	0.87	0.74	0.71	0.85	0.66	0.96	1.14	0.9	1.19	0.93	0.78		0.311	0.1666	0.7959	0.2461	0.1761	0.6099	0.2268	0.2097	0.7946	0.6202	0.6376	0.3635	0.6671	0.3492	0.3076	0.301	0.1444	0.1526	0.0968	0.6317
	4173			N1-methyladenosine	LC/MS pos early	15650	C02494	HMDB0003331	27476					1.17	0.95	1.01	0.82	1.11	0.81	0.86	0.7	0.95	1.06	0.86	1.16	0.82	1.1	1.35		0.0567	0.0761	0.0013	0.0017	0.1432	0.6099	0.0629	0.092	0.5425	0.5433	0.9798	0.4752	0.0174	0.0882	0.32	0.3073	0.0158	0.0394	0.0663	0.5502
	4174			N6-methyladenosine	LC/MS pos early	37114		HMDB0004044	102175					1.11	1.01	0.98	0.79	1.07	0.91	0.88	0.71	0.96	0.97	0.78	1.05	0.8	1.09	1.36		0.2226	0.1368	0.1502	0.0691	0.1969	0.6099	0.4658	0.3167	0.9016	0.6565	0.7875	0.4189	0.0567	0.1139	0.8149	0.4989	0.5439	0.3311	0.3198	0.7731
	4184			N6-carbamoylthreonyladenosine	LC/MS neg	35157		HMDB0041623	161466					1.11	1.01	0.94	1.05	1.17	0.91	0.85	0.94	1.06	0.93	1.04	1.16	1.11	1.24	1.12		0.3777	0.1891	0.3986	0.1486	0.4423	0.6261	0.2764	0.2365	0.8994	0.6565	0.67	0.3751	0.7279	0.3674	0.2081	0.2413	0.3347	0.2514	0.1336	0.6639
	4194			N6-succinyladenosine	LC/MS neg	48130		HMDB0000912	165243					1.03	0.78	1	0.93	1.12	0.76	0.98	0.9	1.09	1.29	1.19	1.44	0.93	1.11	1.2		0.4339	0.208	0.0662	0.0372	0.6216	0.6447	0.7634	0.4377	0.1627	0.3647	0.9596	0.4731	0.3858	0.2636	0.4727	0.3809	0.0925	0.1147	0.7252	0.8407
	4197		Purine Metabolism, Guanine containing	guanosine 5'-monophosphate (5'-GMP)	LC/MS pos early	2849	C00144	HMDB0001397	6804					36.62	1.1	120.02	99.85	9.39	0.03	3.28	2.73	0.26	109.25	90.89	8.55	0.83	0.08	0.09		0.8748	0.3209	0.0287	0.0194	0.2627	0.6099	0.0235	0.0463	0.9603	0.671	0.1208	0.1213	0.3141	0.2401	0.2947	0.2965	0.0264	0.0517	0.4423	0.7971
	4202			guanosine	LC/MS neg	1573	C00387	HMDB0000133	6802					4.47	1.28	1.68	1.13	4.93	0.29	0.38	0.25	1.1	1.31	0.88	3.86	0.67	2.94	4.38		0.798	0.3	0.0384	0.0245	0.4897	0.6261	0.0468	0.0737	0.7028	0.5969	0.4638	0.2919	0.8233	0.3947	0.134	0.1776	0.1028	0.1229	0.1958	0.7154
	4206			7-methylguanine	LC/MS pos early	35114	C02242	HMDB0000897	135398679					0.88	0.81	0.8	0.88	0.97	0.92	0.91	0.99	1.1	0.99	1.08	1.2	1.09	1.21	1.11		0.0833	0.0869	0.9571	0.2808	0.2847	0.6099	0.2446	0.22	0.0435	0.2292	0.0426	0.0655	0.1861	0.1856	0.8043	0.4948	0.3688	0.2636	0.364	0.7908
	4212			N2,N2-dimethylguanosine	LC/MS pos early	35137		HMDB0004824	135501639					1.12	0.74	0.9	1.31	1.31	0.66	0.8	1.17	1.17	1.22	1.78	1.78	1.46	1.46	1		0.0229	0.0566	0.2947	0.1164	0.7265	0.6501	0.4564	0.3114	0.266	0.423	0.9759	0.4752	0.1493	0.1647	0.1521	0.1958	0.0678	0.0921	0.4385	0.7971
	4225		Pyrimidine Metabolism, Orotate containing	N-carbamoylaspartate	LC/MS polar	1594	C00438	HMDB0000828	93072					0.78	0.77	0.66	1.2	1.45	0.99	0.85	1.55	1.87	0.86	1.56	1.88	1.82	2.19	1.21		0.0137	0.0471	0.7132	0.2293	0.3638	0.6211	0.3027	0.248	0.2068	0.3832	0.0793	0.0949	0.8497	0.4016	0.2723	0.2827	0.8117	0.4109	0.4521	0.7971
	4226			dihydroorotate	LC/MS polar	601	C00337	HMDB03349	648					0.99	0.95	0.43	0.75	0.83	0.96	0.44	0.76	0.84	0.46	0.79	0.87	1.73	1.92	1.11		0.0772	0.0846	0.3078	0.1198	0.0627	0.6099	0.8023	0.4492	0.8144	0.628	0.0077	0.0232	0.3007	0.2374	0.6161	0.4372	0.628	0.3541	0.004	0.2782
	4227			orotate	LC/MS polar	1505	C00295	HMDB0000226	967					0.81	0.65	0.62	0.6	0.75	0.81	0.76	0.74	0.92	0.95	0.92	1.14	0.97	1.2	1.24		0.0051	0.0379	0.891	0.2665	0.1406	0.6099	0.1999	0.1934	0.0094	0.1519	0.003	0.0128	0.002	0.0559	0.0762	0.1261	0.1584	0.1608	0.0684	0.5502
	4229			orotidine	LC/MS polar	35172		HMDB0000788	92751					0.93	0.72	1.07	0.89	0.93	0.77	1.16	0.96	1	1.5	1.24	1.3	0.83	0.87	1.05		0.4373	0.2084	0.1547	0.0706	0.28	0.6099	0.7721	0.4403	0.0543	0.2503	0.9877	0.4766	0.2044	0.1937	0.6291	0.4404	0.0983	0.1193	0.7603	0.8407
	4239		Pyrimidine Metabolism, Uracil containing	uridine	LC/MS neg	606	C00299	HMDB0000296	6029					0.85	0.77	0.83	1.02	0.74	0.91	0.98	1.21	0.88	1.08	1.32	0.96	1.22	0.89	0.73		0.1432	0.1103	0.0451	0.0278	0.0662	0.6099	0.168	0.1717	0.0206	0.1932	0.0779	0.0943	0.8579	0.4036	0.0129	0.0422	0.3165	0.2449	0.6859	0.8388
	4240			uracil	LC/MS polar	605	C00106	HMDB0000300	1174					0.99	0.65	0.7	1.08	1.33	0.66	0.7	1.09	1.34	1.07	1.66	2.03	1.55	1.9	1.23		0.0004	0.012	0.5066	0.1752	0.8171	0.6721	0.9311	0.4877	0.0187	0.1918	0.0504	0.0719	0.695	0.3584	0.2361	0.2571	0.0229	0.0471	0.0605	0.5421
	4241			pseudouridine	LC/MS neg	33442	C02067	HMDB0000767	15047					1.05	0.91	0.92	0.92	1.06	0.87	0.87	0.88	1.01	1.01	1.02	1.16	1.01	1.15	1.15		0.2599	0.1492	0.2527	0.1024	0.6614	0.6447	0.5696	0.3607	0.3672	0.4921	0.4094	0.2694	0.442	0.2824	0.5631	0.4177	0.1457	0.1528	0.1676	0.6904
	4242			5,6-dihydrouridine	LC/MS neg	61833		HMDB0000497	94312					1.03	1.01	0.97	0.88	1	0.98	0.94	0.85	0.97	0.97	0.87	1	0.9	1.03	1.14		0.5294	0.2291	0.4717	0.1676	0.5227	0.6261	0.8554	0.4659	0.9856	0.6763	0.7913	0.4193	0.1841	0.1853	0.9765	0.5435	0.8413	0.4218	0.6554	0.8257
	4243			2'-O-methyluridine	LC/MS neg	57655		HMDB0240328	102212					0.89	0.74	0.71	1.13	0.94	0.83	0.8	1.27	1.06	0.96	1.53	1.28	1.59	1.33	0.83		0.0063	0.0406	0.3859	0.1449	0.6263	0.6447	0.6111	0.3781	0.0482	0.2368	0.071	0.0888	0.3308	0.2434	0.8378	0.5033	0.1341	0.1459	0.1861	0.7154
	4244			5-methyluridine (ribothymidine)	LC/MS neg	35136		HMDB0000884	445408					0.91	0.88	1.01	0.97	0.82	0.97	1.12	1.08	0.9	1.16	1.11	0.93	0.96	0.81	0.84		0.4848	0.2202	0.3629	0.1382	0.0154	0.6099	0.254	0.2245	0.0949	0.3086	0.8709	0.444	0.8083	0.3884	0.0148	0.0465	0.5815	0.3412	0.1942	0.7154
	4251			5,6-dihydrouracil	LC/MS neg	1559	C00429	HMDB0000076	649					1.67	1.03	1.01	1.6	1.55	0.62	0.6	0.96	0.93	0.98	1.55	1.5	1.58	1.54	0.97		0.1494	0.1126	0.2916	0.1159	0.1988	0.6099	0.0437	0.0708	0.9047	0.6565	0.7991	0.4214	0.0836	0.1256	0.168	0.2103	0.0566	0.084	0.075	0.574
	4255			2'-deoxyuridine	LC/MS neg	1412	C00526	HMDB0000012	13712					0.85	0.89	0.81	1.08	1.13	1.05	0.96	1.28	1.33	0.91	1.22	1.27	1.33	1.39	1.04		0.192	0.1252	0.4274	0.1559	0.8786	0.684	0.4222	0.2972	0.6224	0.574	0.3322	0.2368	0.5693	0.321	0.6326	0.4416	0.7544	0.3923	0.8652	0.8419
	4257			3-ureidoisobutyrate	LC/MS polar	57549	C05100	HMDB0002031	160663					0.41	0.44	0.3	1.26	0.8	1.08	0.74	3.12	1.96	0.68	2.88	1.81	4.23	2.66	0.63		0.0005	0.013	0.0151	0.0118	0.6237	0.6447	0.0303	0.0543	0.0338	0.2085	0.0033	0.0135	0.3204	0.2401	0.8266	0.5005	0.9623	0.4502	0.3791	0.7971
	4258			3-ureidopropionate	LC/MS pos early	3155	C02642	HMDB0000026	111					0.81	0.9	0.61	1.06	1.02	1.12	0.75	1.32	1.27	0.67	1.18	1.14	1.76	1.69	0.96		0.0532	0.0744	0.0356	0.0232	0.3744	0.6231	0.3568	0.2765	0.7519	0.6088	0.0103	0.0271	0.6251	0.3371	0.9738	0.5435	0.5425	0.3311	0.0846	0.6014
	4259			beta-alanine	LC/MS pos early	55	C00099	HMDB0000056	239					0.83	0.74	0.73	0.83	0.86	0.89	0.88	1	1.04	0.99	1.12	1.17	1.13	1.18	1.04		0.3922	0.1938	0.4854	0.1706	0.8389	0.6778	0.3842	0.2845	0.2344	0.4017	0.1505	0.1371	0.6125	0.3338	0.558	0.4151	0.7445	0.3895	0.5601	0.8156
	4261			N-acetyl-beta-alanine	LC/MS neg	37432	C01073	HMDB0061880	76406					1.21	0.97	1.28	1.17	1.58	0.81	1.06	0.97	1.31	1.31	1.2	1.62	0.91	1.23	1.35		0.0524	0.0741	0.0019	0.0023	0.7566	0.6573	0.1711	0.1732	0.8261	0.6347	0.0921	0.1039	0.3018	0.2374	0.0012	0.0082	0.1144	0.1333	0.7404	0.8407
	4267		Pyrimidine Metabolism, Cytidine containing	cytidine 5'-monophosphate (5'-CMP)	LC/MS pos early	2372	C00055	HMDB0000095	6131					2.04	0.6	2.06	1.31	1.66	0.3	1.01	0.64	0.82	3.42	2.17	2.76	0.63	0.81	1.27		0.5182	0.2265	6.9938e-05	0.0002	0.4601	0.6261	0.027	0.0499	0.1869	0.3672	0.0308	0.0537	0.617	0.335	0.1764	0.2167	0.0008	0.0054	0.9543	0.8541
	4271			cytidine	LC/MS pos early	514	C00475	HMDB0000089	6175					1.07	0.81	0.98	1.09	1.02	0.75	0.91	1.02	0.95	1.21	1.35	1.26	1.12	1.04	0.93		0.1645	0.1168	0.5239	0.1792	0.4694	0.6261	0.5445	0.351	0.1455	0.3506	0.7043	0.3868	0.617	0.335	0.9225	0.5306	0.0428	0.0716	0.3266	0.7756
	4272			cytosine	LC/MS pos early	573	C00380	HMDB0000630	597					0.99	0.61	0.97	0.82	1.19	0.62	0.98	0.83	1.2	1.59	1.33	1.93	0.84	1.22	1.45		0.5841	0.2438	0.13	0.0623	0.374	0.6231	0.8043	0.4498	0.1822	0.3647	0.9496	0.4703	0.4017	0.2682	0.4356	0.3623	0.2741	0.2249	0.8536	0.8419
	4274			3-methylcytidine	LC/MS pos early	35132		HMDB0240577	14237477					0.85	0.62	0.55	0.56	0.76	0.72	0.64	0.66	0.89	0.89	0.91	1.24	1.03	1.4	1.36		0.0015	0.0254	0.913	0.2718	0.1309	0.6099	0.3476	0.274	0.0066	0.1293	0.0013	0.0074	0.0022	0.0559	0.1294	0.1743	0.0613	0.0874	0.0157	0.3755
	4275			5-methylcytidine	LC/MS pos early	22119		HMDB0000982	92918					1.49	1.01	1.23	1.09	1.4	0.68	0.83	0.73	0.95	1.22	1.08	1.39	0.88	1.14	1.29		0.2771	0.1556	5.269e-06	1.9923e-05	0.2305	0.6099	7.1725e-05	0.001	0.7697	0.6143	0.0198	0.0406	0.2611	0.2189	0.0006	0.0052	0.0002	0.0017	0.0481	0.5054
	4276			N4-acetylcytidine	LC/MS pos early	35130		HMDB0005923	107461					1.49	1.07	1.51	1.18	1.3	0.71	1.01	0.79	0.87	1.42	1.11	1.22	0.78	0.86	1.11		0.9211	0.3306	0.0689	0.0385	0.4062	0.6261	0.1418	0.1542	0.9896	0.6767	0.0842	0.0983	0.5418	0.3127	0.5528	0.4131	0.1452	0.1527	0.7858	0.8407
	4282			2'-deoxycytidine	LC/MS pos early	15949	C00881	HMDB0000014	13711					1.24	0.85	1.08	1.12	1.32	0.69	0.88	0.91	1.06	1.28	1.32	1.55	1.03	1.21	1.17		0.0264	0.059	0.0037	0.0039	0.8323	0.676	0.0571	0.0869	0.1816	0.3647	0.4602	0.2909	0.3158	0.2401	0.0261	0.0643	0.002	0.0094	0.2307	0.7205
	4284			2'-O-methylcytidine	LC/MS pos early	57554			150971					1.08	0.8	0.89	1.11	1.11	0.74	0.82	1.03	1.02	1.11	1.39	1.38	1.25	1.24	0.99		0.0048	0.0379	0.3488	0.1334	0.7705	0.6585	0.4689	0.3174	0.0568	0.2557	0.3122	0.2255	0.3835	0.2633	0.4002	0.3483	0.0105	0.0305	0.0874	0.6076
	4285			5-methyl-2'-deoxycytidine	LC/MS pos early	38159	C03592	HMDB0002224	440055					0.95	0.85	0.87	0.85	1.01	0.89	0.92	0.9	1.06	1.03	1	1.19	0.98	1.16	1.19		0.2969	0.1613	0.3654	0.1387	0.4412	0.6261	0.7738	0.4407	0.1569	0.3625	0.2851	0.2108	0.1553	0.1688	0.9484	0.538	0.2552	0.2144	0.4315	0.7971
	4294		Pyrimidine Metabolism, Thymine containing	thymidine	LC/MS neg	2183	C00214	HMDB0000273	5789					0.75	0.75	0.79	1.08	1.14	1	1.05	1.43	1.52	1.05	1.43	1.52	1.36	1.44	1.06		0.1576	0.1149	0.4671	0.1671	0.5812	0.6334	0.2296	0.2109	0.2779	0.4319	0.3977	0.2655	0.6071	0.332	0.8254	0.5005	0.9048	0.4383	0.7163	0.8407
	4297			thymine	LC/MS neg	604	C00178	HMDB0000262	1135					0.77	0.74	0.52	1.25	1.11	0.97	0.68	1.62	1.44	0.71	1.68	1.5	2.38	2.12	0.89		0.005	0.0379	0.1677	0.0747	0.83	0.6759	0.4097	0.2933	0.2863	0.44	0.0263	0.0485	0.339	0.2445	0.5529	0.4131	0.8053	0.4092	0.1467	0.6706
	4300			5,6-dihydrothymine	LC/MS pos early	1418	C00906	HMDB0000079	93556					2.64	0.85	1.87	2	2.19	0.32	0.71	0.76	0.83	2.21	2.36	2.58	1.07	1.17	1.09		0.5527	0.2347	0.0367	0.0237	0.4442	0.6261	0.0436	0.0708	0.6944	0.5951	0.3298	0.2355	0.4862	0.2987	0.3302	0.3115	0.0176	0.0413	0.2771	0.7483
	4303			3-aminoisobutyrate	LC/MS pos early	1566	C05145	HMDB0002166	64956					0.55	0.39	0.46	0.77	0.76	0.71	0.84	1.41	1.4	1.17	1.98	1.96	1.69	1.67	0.99		0.003	0.0334	0.747	0.2344	0.1629	0.6099	0.0861	0.1123	0.0013	0.068	0.0113	0.0289	0.3591	0.2544	0.5952	0.4294	0.0953	0.1169	0.3719	0.7929
	4304		Purine and Pyrimidine Metabolism	methylphosphate	LC/MS pos early	37070		HMDB61711	13130					0.88	1.21	1.2	1.51	0.66	1.38	1.36	1.72	0.75	0.99	1.25	0.55	1.26	0.55	0.44		0.4387	0.2084	0.0145	0.0115	0.0894	0.6099	0.7304	0.4255	0.2646	0.423	0.7242	0.3953	0.0577	0.1139	0.1818	0.2215	0.1474	0.1539	0.4866	0.7971
	4320	Cofactors and Vitamins	Nicotinate and Nicotinamide Metabolism	quinolinate	LC/MS pos early	1899	C03722	HMDB0000232	1066					1.25	1.2	1.74	0.66	1.17	0.96	1.39	0.53	0.94	1.45	0.55	0.98	0.38	0.68	1.79		0.2096	0.1332	0.0938	0.0481	0.4787	0.6261	0.8665	0.4691	0.7541	0.6093	0.2268	0.1774	0.155	0.1688	0.6587	0.4511	0.8845	0.4351	0.296	0.7556
	4322			nicotinate ribonucleoside	LC/MS pos early	33471	C05841	HMDB0006809	161233					0.57	0.28	0.55	0.45	0.44	0.49	0.97	0.79	0.77	1.96	1.6	1.56	0.82	0.79	0.97		0.127	0.1064	0.7126	0.2293	0.0725	0.6099	0.1355	0.1518	0.0047	0.1293	0.2422	0.1867	0.0386	0.1046	0.0795	0.1287	0.1451	0.1527	0.7373	0.8407
	4324			nicotinamide	LC/MS pos early	594	C00153	HMDB0001406	936					1.03	1.48	2.4	1.6	1.03	1.44	2.34	1.56	1	1.62	1.08	0.7	0.67	0.43	0.64		0.0751	0.0846	0.8425	0.2578	0.4544	0.6261	0.996	0.5031	0.2326	0.4009	0.0615	0.0812	0.4119	0.273	0.8137	0.4989	0.2345	0.2069	0.0621	0.5421
	4327			nicotinamide riboside	LC/MS pos early	33013	C03150	HMDB0000855	439924					0.83	1.37	1.31	1.32	0.98	1.65	1.58	1.59	1.18	0.96	0.97	0.71	1.01	0.75	0.74		0.0104	0.0451	0.0482	0.0291	0.5369	0.6261	0.3321	0.2637	0.0488	0.2368	0.133	0.1271	0.1087	0.1422	0.6833	0.4585	0.0046	0.0173	0.0163	0.3783
	4335			nicotinamide N-oxide	LC/MS pos early	39582		HMDB0002730	72661					1.14	1.66	2.39	0.69	0.82	1.45	2.09	0.6	0.72	1.44	0.41	0.5	0.29	0.34	1.2		0.0023	0.0306	0.5296	0.1806	0.9781	0.7116	0.8363	0.4615	0.1022	0.3137	0.0358	0.059	0.3821	0.2633	0.622	0.4379	0.1505	0.1555	0.0562	0.5421
	4336			1-methylnicotinamide	LC/MS pos early	27665	C02918	HMDB0000699	457					1.5	1.86	2.32	1.12	1.48	1.24	1.55	0.75	0.99	1.25	0.61	0.8	0.49	0.64	1.32		0.1268	0.1064	0.648	0.212	0.907	0.6924	0.5468	0.351	0.1358	0.3453	0.0941	0.1051	0.7028	0.3598	0.7063	0.4675	0.3651	0.2632	0.2739	0.7483
	4342			trigonelline (N'-methylnicotinate)	LC/MS pos early	32401	C01004	HMDB0000875	5570					0.22	0.4	0.32	0.45	0.29	1.86	1.49	2.07	1.34	0.8	1.12	0.72	1.39	0.9	0.65		0.6829	0.2692	0.0152	0.0119	0.1975	0.6099	0.0052	0.0189	0.145	0.3506	0.0375	0.0609	0.0935	0.1319	0.0175	0.0501	0.1462	0.153	0.4208	0.7971
	4344			N1-methyl-2-pyridone-5-carboxamide	LC/MS neg	40469	C05842	HMDB0004193	69698					0.96	1.09	1.37	0.72	0.83	1.14	1.43	0.76	0.86	1.26	0.67	0.76	0.53	0.6	1.14		0.0341	0.0656	0.9443	0.2789	0.5314	0.6261	0.4147	0.2955	0.5639	0.5505	0.1884	0.1587	0.3286	0.2433	0.428	0.359	0.1678	0.1665	0.037	0.4776
	4345			N1-methyl-4-pyridone-3-carboxamide	LC/MS pos early	57584	C05843	HMDB0004194	440810					1.17	0.91	1.31	0.6	0.78	0.78	1.12	0.52	0.67	1.43	0.66	0.86	0.46	0.6	1.3		0.1763	0.1211	0.3912	0.1461	0.5736	0.6309	0.7569	0.4354	0.841	0.639	0.3396	0.2386	0.2084	0.1965	0.529	0.4062	0.9131	0.4392	0.2088	0.7192
	4352		Riboflavin Metabolism	riboflavin (vitamin B2)	LC/MS neg	1827	C00255	HMDB0000244	493570					0.57	0.73	0.74	1.04	0.69	1.27	1.29	1.81	1.21	1.02	1.43	0.95	1.4	0.93	0.67		0.5319	0.2291	0.1088	0.0538	0.2733	0.6099	0.0878	0.1134	0.143	0.3501	0.2712	0.2033	0.8194	0.3933	0.2219	0.2507	0.7984	0.4066	0.5279	0.8015
	4353			flavin adenine dinucleotide (FAD)	LC/MS neg	2134	C00016	HMDB0001248	643975					0.98	0.83	1.07	0.96	0.8	0.84	1.09	0.98	0.81	1.29	1.16	0.97	0.9	0.75	0.83		0.3207	0.1682	0.755	0.236	0.1458	0.6099	0.9291	0.4877	0.122	0.3364	0.8899	0.4497	0.5712	0.3214	0.1055	0.157	0.1439	0.1525	0.8201	0.8407
	4357		Pantothenate and CoA Metabolism	pantothenate	LC/MS neg	1508	C00864	HMDB0000210	6613					0.98	0.97	0.89	1.13	0.94	0.99	0.91	1.16	0.96	0.92	1.17	0.97	1.27	1.06	0.83		0.4653	0.2155	0.3438	0.1319	0.522	0.6261	0.938	0.4905	0.7607	0.6111	0.5689	0.3361	0.2465	0.2134	0.7706	0.4888	0.7024	0.3778	0.5178	0.8015
	4369		Ascorbate and Aldarate Metabolism	ascorbic acid 2-sulfate	LC/MS polar	63590		HMDB0060649	54676864					0.87	1.17	0.9	0.95	0.86	1.35	1.04	1.1	0.99	0.77	0.81	0.73	1.06	0.96	0.9		0.5016	0.2241	0.0857	0.0452	0.7123	0.6492	0.3946	0.2888	0.3427	0.4827	0.4843	0.2971	0.6709	0.3495	0.344	0.3202	0.0766	0.0998	0.8778	0.8419
	4370			ascorbic acid 3-sulfate*	LC/MS polar	63687			11425365					0.83	1.13	0.83	0.87	0.83	1.36	0.99	1.05	1	0.73	0.77	0.73	1.06	1.01	0.95		0.5037	0.2241	0.1962	0.0847	0.6484	0.6447	0.3846	0.2845	0.6669	0.5878	0.3635	0.2503	0.3135	0.2401	0.2924	0.2953	0.1971	0.1847	0.9681	0.8558
	4373			2-O-methylascorbic acid	LC/MS polar	63990		HMDB0240294	54726398					1.08	0.97	0.8	0.65	0.93	0.9	0.74	0.6	0.86	0.83	0.67	0.96	0.81	1.16	1.44		0.0295	0.0608	0.2151	0.0901	0.0627	0.6099	0.481	0.3237	0.8331	0.6366	0.2357	0.1827	0.0072	0.0618	0.7055	0.4675	0.3615	0.2617	0.0631	0.5421
	4374			threonate	LC/MS polar	27738	C01620	HMDB0000943 HMDB0062620	5460407;151152					1.48	1.18	1.08	0.87	1.39	0.8	0.73	0.59	0.94	0.91	0.74	1.18	0.81	1.29	1.59		0.6959	0.2725	0.0075	0.0067	0.023	0.6099	0.0127	0.0308	0.2399	0.4034	0.6358	0.3634	0.4565	0.2879	0.0305	0.0699	0.1617	0.1627	0.0387	0.4776
	4377			oxalate (ethanedioate)	LC/MS neg	20694	C00209	HMDB0002329	971					1.29	1.2	1.17	0.83	1.21	0.93	0.91	0.64	0.93	0.98	0.69	1	0.71	1.03	1.45		0.2099	0.1332	0.0198	0.0146	0.13	0.6099	0.0623	0.0914	0.1744	0.3647	0.2637	0.199	0.2232	0.201	0.1981	0.2341	0.5934	0.3451	0.4354	0.7971
	4378			gulonate*	LC/MS polar	46957	C00800	HMDB0003290	152304					1.15	0.79	1.13	0.54	1.18	0.69	0.98	0.47	1.03	1.42	0.68	1.49	0.48	1.05	2.2		0.1244	0.1061	0.0015	0.002	0.1488	0.6099	0.5223	0.345	0.1917	0.3695	0.6262	0.361	0.0064	0.0618	0.5717	0.4234	0.0558	0.0834	0.8779	0.8419
	4381		Tocopherol Metabolism	alpha-tocopherol	LC/MS pos late	1561	C02477	HMDB0001893	86472					1.74	1.24	0.22	0.51	1.04	0.71	0.13	0.29	0.6	0.18	0.41	0.84	2.3	4.72	2.05		0.1602	0.1159	0.4987	0.1735	0.0067	0.5102	0.0885	0.114	0.4252	0.5045	0.125	0.1238	0.2503	0.2135	0.5252	0.4039	0.3514	0.2568	0.0021	0.2034
	4391			alpha-CEHC glucuronide*	LC/MS neg	39346		HMDB0062445	134819285					0.16	0.57	0.38	1.1	0.19	3.63	2.43	7.02	1.23	0.67	1.94	0.34	2.9	0.51	0.17		0.7927	0.2983	2.9296e-06	1.2308e-05	0.0958	0.6099	0.0002	0.0023	0.1352	0.3453	0.0064	0.0208	0.7522	0.3712	0.0006	0.005	0.0142	0.0376	0.2336	0.7205
	4395			alpha-CEHC	LC/MS neg	48188		HMDB0001518	9943542					0.4	0.65	0.46	0.48	0.35	1.6	1.14	1.18	0.86	0.71	0.74	0.54	1.04	0.75	0.72		0.2472	0.1452	0.0529	0.0312	0.5031	0.6261	0.0589	0.0879	0.3873	0.4921	0.042	0.0655	0.0492	0.1139	0.0262	0.0643	0.2892	0.2319	0.8758	0.8419
	4405		Biotin Metabolism	biotin	LC/MS pos early	568	C00120	HMDB0000030	171548					0.44	1.03	0.52	1	0.61	2.32	1.18	2.25	1.37	0.51	0.97	0.59	1.9	1.16	0.61		0.7475	0.2878	0.0004	0.0007	0.8161	0.6721	0.0117	0.0293	0.8238	0.6337	0.0445	0.0665	0.9459	0.4294	0.0995	0.1517	0.0067	0.023	0.5697	0.8156
	4411		Tetrahydrobiopterin Metabolism	biopterin	LC/MS neg	12358	C06313	HMDB0000468	445040					1.3	1.19	1.31	1.67	1.29	0.91	1.01	1.28	0.99	1.1	1.4	1.08	1.28	0.98	0.77		0.4982	0.223	0.734	0.2337	0.2873	0.6099	0.1675	0.1715	0.3653	0.4921	0.35	0.2435	0.0598	0.1149	0.2794	0.2856	0.6259	0.3538	0.647	0.8257
	4412			dihydrobiopterin	LC/MS neg	35129	C00268	HMDB0000038	135402011					1.09	0.86	1.16	0.91	1.22	0.79	1.07	0.83	1.12	1.35	1.06	1.42	0.78	1.05	1.34		0.9992	0.348	0.2275	0.0943	0.558	0.6261	0.8641	0.4684	0.4848	0.5211	0.5887	0.3443	0.5323	0.3115	0.6791	0.4581	0.597	0.3463	0.4774	0.7971
	4428		Hemoglobin and Porphyrin Metabolism	heme	LC/MS pos late	41754	C00032	HMDB0003178	26945					0.76	0.57	2.64	2.19	1.15	0.75	3.48	2.88	1.52	4.62	3.82	2.01	0.83	0.44	0.53		0.0897	0.089	0.2131	0.0895	0.0133	0.5734	0.9301	0.4877	0.8427	0.6392	0.0044	0.017	0.0906	0.1311	0.4364	0.3623	0.9118	0.4392	0.0035	0.2775
	4429			bilirubin (Z,Z)	LC/MS pos late	43807	C00486	HMDB0000054	5280352					1.29	0.92	0.02	0.75	0.44	0.71	0.01	0.58	0.34	0.02	0.82	0.48	48.72	28.37	0.58		0.1304	0.1075	0.2726	0.1092	0.0118	0.5556	0.279	0.237	0.4404	0.5051	0.022	0.0432	0.4954	0.2992	0.5898	0.427	0.7516	0.3918	0.0013	0.169
	4430			bilirubin (E,E)*	LC/MS pos late	32586		HMDB0240584	129320511					1.22	0.8	0.17	0.91	0.45	0.66	0.14	0.75	0.37	0.21	1.14	0.56	5.38	2.67	0.5		0.137	0.1094	0.3093	0.1202	0.124	0.6099	0.4914	0.3273	0.8948	0.6554	0.0438	0.0662	0.4924	0.2989	0.3473	0.3209	0.5775	0.3406	0.0085	0.3345
	4432			biliverdin	LC/MS pos late	2137	C00500	HMDB0001008	5280353					0.67	0.94	0.47	1.35	1	1.41	0.71	2.03	1.5	0.5	1.44	1.07	2.86	2.12	0.74		0.627	0.2564	0.7362	0.2337	0.3447	0.6211	0.8992	0.4778	0.9904	0.6767	0.2059	0.1695	0.6528	0.3455	0.7194	0.4715	0.9087	0.4385	0.2534	0.7483
	4441		Thiamine Metabolism	thiamin (vitamin B1)	LC/MS pos early	5341	DG00125 C00378 D08580	HMDB0000235	1130					0.37	0.53	0.49	0.73	0.53	1.42	1.33	1.97	1.42	0.94	1.39	1	1.48	1.07	0.72		0.1726	0.1202	0.0377	0.0243	0.3469	0.6211	0.0194	0.0406	0.0491	0.2368	0.0139	0.0324	0.492	0.2989	0.1604	0.2032	0.684	0.3745	0.8888	0.8419
	4445			hydroxymethylpyrimidine	LC/MS pos early	57565	C01279		777					1.03	0.91	1.32	0.69	0.86	0.88	1.28	0.67	0.83	1.45	0.76	0.94	0.52	0.65	1.24		0.44	0.2084	0.3667	0.139	0.6298	0.6447	0.7967	0.4492	0.4393	0.5051	0.8448	0.436	0.163	0.1731	0.5787	0.4253	0.6045	0.3488	0.6505	0.8257
	4450		Vitamin A Metabolism	retinol (vitamin A)	LC/MS pos late	1806	C00473	HMDB0000305	445354					1.55	1.38	0.88	0.7	1.1	0.89	0.57	0.45	0.71	0.64	0.51	0.8	0.8	1.25	1.56		0.1453	0.1106	0.3879	0.1454	0.044	0.6099	0.2006	0.1937	0.527	0.5383	0.3392	0.2386	0.1019	0.1374	0.8902	0.5205	0.5103	0.3198	0.0291	0.4708
	4458			retinal	LC/MS pos late	40807	C00376	HMDB0001358	638015					1.42	1.3	0.89	0.7	1.03	0.92	0.63	0.49	0.72	0.69	0.54	0.79	0.78	1.15	1.47		0.1804	0.1221	0.4713	0.1676	0.0556	0.6099	0.2517	0.2242	0.6568	0.5873	0.2567	0.1954	0.1263	0.1519	0.8961	0.5214	0.4781	0.3064	0.0263	0.4708
	4468		Vitamin B6 Metabolism	pyridoxamine	LC/MS pos early	2150	C00534	HMDB0001431	1052					0.61	1.01	0.61	1.5	0.77	1.66	1	2.46	1.27	0.6	1.48	0.77	2.45	1.27	0.52		0.0633	0.0807	0.0007	0.001	0.7726	0.6585	0.1214	0.1392	0.9836	0.6763	0.0134	0.0318	0.1393	0.1591	0.4504	0.3667	0.1262	0.1411	0.3163	0.7701
	4471			pyridoxal	LC/MS pos early	1651	C00250	HMDB0001545	1050					0.62	0.9	0.65	1.11	0.73	1.44	1.05	1.78	1.17	0.73	1.23	0.81	1.7	1.11	0.66		0.2636	0.1509	0.016	0.0122	0.9283	0.7011	0.1573	0.1632	0.5805	0.5525	0.0276	0.05	0.7376	0.3685	0.3978	0.3483	0.3812	0.2679	0.3997	0.7971
	4472			pyridoxate	LC/MS neg	31555	C00847	HMDB0000017	6723					0.6	0.62	0.48	1.02	0.64	1.04	0.81	1.71	1.07	0.78	1.64	1.03	2.11	1.32	0.63		0.0653	0.0816	0.0074	0.0067	0.9093	0.6924	0.0903	0.1155	0.1179	0.3322	0.0064	0.0208	0.7891	0.3828	0.1152	0.1637	0.8904	0.4361	0.2565	0.7483
	4483	Xenobiotics	Benzoate Metabolism	hippurate	LC/MS neg	15753	C01586	HMDB0000714	464					0.54	0.5	0.42	0.35	0.43	0.93	0.78	0.65	0.79	0.84	0.7	0.85	0.84	1.02	1.21		0.014	0.0471	0.6414	0.2101	0.1481	0.6099	0.0769	0.1033	0.0143	0.1693	0.0158	0.0352	0.0014	0.0458	0.0168	0.0498	0.4558	0.2989	0.4815	0.7971
	4491			4-hydroxyhippurate	LC/MS neg	35527		HMDB0013678	151012					1.58	0.33	0.92	0.48	1.26	0.21	0.58	0.3	0.8	2.81	1.46	3.84	0.52	1.37	2.63		0.0044	0.0379	0.0003	0.0005	0.6985	0.6485	0.1056	0.1278	0.0066	0.1293	0.6353	0.3634	0.0527	0.1139	0.4024	0.3486	5.973e-05	0.0008	0.0394	0.4776
	4498			benzoate	LC/MS neg	15778	C00180	HMDB0001870	243					0.84	0.71	0.73	0.55	0.78	0.84	0.86	0.65	0.93	1.03	0.77	1.11	0.75	1.08	1.43		0.1619	0.1162	0.9187	0.2732	0.4368	0.6261	0.7382	0.4289	0.3685	0.4921	0.1404	0.1309	0.0492	0.1139	0.362	0.3308	0.5697	0.3384	0.2494	0.7483
	4520			catechol sulfate	LC/MS neg	35320		HMDB0059724	3083879					0.17	1.17	0.23	0.76	0.12	7.02	1.41	4.56	0.71	0.2	0.65	0.1	3.22	0.5	0.16		0.0199	0.0517	3.7229e-08	3.5192e-07	0.8136	0.6721	8.0391e-05	0.001	0.6959	0.5951	0.0008	0.0056	0.0653	0.1162	3.8911e-06	0.0002	2.4437e-05	0.0004	0.4439	0.7971
	4526			4-ethylcatechol sulfate	LC/MS neg	63072								0.25	0.52	0.17	0.56	0.31	2.09	0.7	2.27	1.23	0.33	1.09	0.59	3.24	1.76	0.54		0.2207	0.1365	0.0057	0.0055	0.6765	0.6447	0.0232	0.0461	0.1159	0.3316	0.0028	0.0126	0.3326	0.2442	0.042	0.087	0.4523	0.2976	0.4108	0.7971
	4527			4-methylcatechol sulfate	LC/MS neg	46146		HMDB0240459	54104170					0.27	0.78	0.33	0.36	0.02	2.87	1.22	1.33	0.09	0.43	0.46	0.03	1.09	0.07	0.06		0.1453	0.1106	0.0036	0.0039	0.9703	0.7081	0.0575	0.087	0.6623	0.5878	0.2472	0.1893	0.3847	0.2636	0.0105	0.0374	0.0216	0.046	0.4372	0.7971
	4528			4-allylcatechol sulfate	LC/MS neg	63597								0.69	0.74	0.69	0.85	0.69	1.07	1	1.23	1	0.94	1.16	0.94	1.23	1	0.81		0.5332	0.2291	0.0537	0.0314	0.5332	0.6261	0.0531	0.0817	0.1207	0.3356	0.0531	0.0746	0.3465	0.2474	0.0531	0.1002	0.684	0.3745	1	0.8658
	4539			4-acetylphenol sulfate	LC/MS neg	44620			4684006					0.49	0.66	0.47	0.58	0.48	1.35	0.95	1.19	0.98	0.7	0.88	0.72	1.25	1.03	0.82		0.2947	0.1609	0.0105	0.009	0.419	0.6261	0.0123	0.03	0.096	0.3086	0.0069	0.0217	0.0717	0.1162	0.0096	0.0349	0.36	0.2613	0.8207	0.8407
	4545			4-ethylphenylsulfate	LC/MS neg	36099	C13637	HMDB0062551	20822574					0.21	0.42	0.12	0.76	0.19	2.06	0.59	3.67	0.93	0.29	1.79	0.45	6.18	1.56	0.25		0.2416	0.1438	0.0025	0.0028	0.7167	0.6492	0.0178	0.0386	0.0916	0.3086	0.0042	0.0162	0.5676	0.321	0.0214	0.0573	0.4585	0.3002	0.5674	0.8156
	4566			methyl-4-hydroxybenzoate sulfate	LC/MS neg	48429		HMDB0041646	10657183					0.95	0.57	0.8	0.73	1	0.61	0.85	0.77	1.06	1.4	1.27	1.75	0.91	1.25	1.38		0.0411	0.0695	0.0294	0.0196	0.5059	0.6261	0.7299	0.4255	0.0149	0.1693	0.4625	0.2919	0.2125	0.1971	0.6228	0.4379	0.0062	0.0221	0.2827	0.7483
	4574			p-cresol sulfate	LC/MS neg	36103		HMDB0011635	4615423					0.62	1.64	0.76	0.73	0.02	2.64	1.21	1.18	0.03	0.46	0.45	0.01	0.97	0.03	0.03		0.1127	0.1005	0.1082	0.0538	0.9685	0.7081	0.3426	0.271	0.4438	0.5061	0.9941	0.4774	0.5757	0.3221	0.0999	0.1517	0.0911	0.1137	0.3389	0.7886
	4576			2-amino-p-cresol sulfate	LC/MS neg	37180								1.5	1.3	0.89	0.34	0.47	0.87	0.6	0.23	0.32	0.69	0.26	0.37	0.38	0.53	1.39		0.0042	0.0379	0.1461	0.0677	0.5559	0.6261	0.1062	0.1282	0.5767	0.5525	0.502	0.3045	0.0713	0.1162	0.2974	0.2967	0.2814	0.2278	0.3343	0.7818
	4581			o-cresol sulfate	LC/MS neg	36845		HMDB0011635	11615528					0.42	0.82	0.8	1.15	0.48	1.94	1.91	2.73	1.15	0.98	1.41	0.59	1.43	0.6	0.42		0.4795	0.2197	0.0072	0.0066	0.4301	0.6261	0.0157	0.0359	0.6448	0.5833	0.2592	0.1963	0.4209	0.2754	0.016	0.0479	0.0455	0.0739	0.1731	0.693
	4590			3-(3-hydroxyphenyl)propionate sulfate	LC/MS neg	45415		HMDB0094710	187488					0.08	1.45	0.25	0.55	0.09	17.69	3.02	6.64	1.15	0.17	0.38	0.07	2.2	0.38	0.17		0.0149	0.0471	4.2324e-09	4.8706e-08	0.6415	0.6447	1.6817e-05	0.0003	0.1398	0.3477	0.0032	0.0134	0.309	0.2401	3.5858e-05	0.0007	1.6281e-07	9.8086e-06	0.0791	0.592
	4595			3-(4-hydroxyphenyl)propionate	LC/MS neg	39587	C01744	HMDB0002199	10394					0.51	0.96	0.64	1.04	0.85	1.89	1.26	2.07	1.68	0.67	1.09	0.89	1.64	1.33	0.81		0.2394	0.143	0.0023	0.0027	0.6511	0.6447	0.0147	0.0344	0.9875	0.6763	0.0717	0.0893	0.5987	0.3295	0.4801	0.3839	0.0142	0.0376	0.4844	0.7971
	4596			3-phenylpropionate (hydrocinnamate)	LC/MS neg	15749	C05629	HMDB0000764	107					0.44	0.49	0.49	0.44	0.48	1.1	1.11	1	1.09	1.01	0.91	0.99	0.9	0.98	1.09		0.2375	0.143	0.1904	0.083	0.2868	0.6099	0.0444	0.0716	0.0603	0.2592	0.0507	0.072	0.0413	0.1049	0.0297	0.0698	0.8869	0.4351	0.9511	0.8541
	4794		Food Component/Plant	2,3-dihydroxyisovalerate	LC/MS polar	38276	C04039	HMDB0012141	677					1.17	0.93	1.02	0.61	0.99	0.79	0.87	0.52	0.84	1.1	0.65	1.06	0.6	0.97	1.62		0.0127	0.0471	0.0024	0.0028	0.1824	0.6099	0.2019	0.1946	0.4684	0.5133	0.837	0.4345	0.0024	0.0559	0.8856	0.5205	0.0495	0.0779	0.2818	0.7483
	4799			2,8-quinolinediol sulfate	LC/MS neg	48691		HMDB0240658						0.21	0.37	0.21	0.5	0.25	1.73	1	2.36	1.16	0.58	1.37	0.67	2.37	1.17	0.49		0.3376	0.1753	0.0102	0.0087	0.3782	0.6231	0.0103	0.0277	0.0548	0.2503	0.0076	0.0232	0.1712	0.1763	0.0153	0.0471	0.4752	0.305	0.9052	0.8419
	4802			2-isopropylmalate	LC/MS polar	15667	C02504	HMDB0000402	77					0.94	0.71	0.61	0.92	0.67	0.75	0.64	0.98	0.72	0.85	1.3	0.95	1.52	1.11	0.73		0.0826	0.0868	0.178	0.0786	0.7245	0.6501	0.5286	0.3457	0.0843	0.3041	0.0434	0.0662	0.8443	0.4014	0.1133	0.1637	0.2622	0.2181	0.1538	0.6777
	4803			2-oxindole-3-acetate	LC/MS pos early	40479		HMDB0035514	3080590					0.57	0.98	0.76	1.27	0.57	1.72	1.34	2.23	1	0.78	1.29	0.58	1.66	0.75	0.45		0.6135	0.2528	0.0006	0.0008	0.4765	0.6261	0.0638	0.0921	0.7058	0.5973	0.2779	0.2073	0.2213	0.2007	0.0638	0.1134	0.0278	0.0537	0.4226	0.7971
	4807			3-formylindole	LC/MS neg	62863	C08493	HMDB29737	10256					0.62	0.78	0.88	1.01	0.72	1.25	1.42	1.62	1.17	1.13	1.29	0.93	1.15	0.82	0.72		0.945	0.3365	0.0483	0.0291	0.0513	0.6099	0.0115	0.0292	0.1289	0.3411	0.4664	0.2932	0.7945	0.3845	0.058	0.1066	0.2749	0.2251	0.0619	0.5421
	4827			gluconate	LC/MS polar	587	C00257	HMDB0000625	3085666;10690					1.23	1.05	0.99	0.92	1.02	0.85	0.81	0.75	0.83	0.94	0.88	0.97	0.93	1.03	1.11		0.772	0.2944	0.5071	0.1752	0.7509	0.6541	0.4457	0.3086	0.8358	0.6366	0.9854	0.4766	0.6685	0.3492	0.8543	0.5094	0.5774	0.3406	0.435	0.7971
	4893			daidzein	LC/MS neg	32453	C10208	HMDB0003312	5281708					0.28	0.25	0.25	0.35	0.25	0.91	0.91	1.26	0.91	1	1.39	1	1.39	1	0.72		0.0938	0.0899	0.0753	0.0408	0.2128	0.6099	0.0185	0.0392	0.0092	0.1519	0.0092	0.0257	0.0479	0.1139	0.0092	0.0346	0.7771	0.3992	0.7771	0.8407
	4896			genistein sulfate*	LC/MS neg	62061								0.05	0.05	0.05	0.17	0.19	1	1	3.12	3.63	1	3.12	3.63	3.12	3.63	1.16		0.1233	0.1054	0.1141	0.0561	0.251	0.6099	0.0282	0.0511	0.0282	0.1957	0.0282	0.0506	0.5341	0.3115	0.2592	0.2733	1	0.4629	1	0.8658
	4901			dihydroferulate	LC/MS neg	40481		HMDB0062121	14340					0.55	0.62	0.6	0.56	0.72	1.13	1.09	1.02	1.31	0.96	0.91	1.16	0.94	1.21	1.28		0.5763	0.2419	0.6346	0.2086	0.2757	0.6099	0.14	0.1534	0.1608	0.3647	0.1333	0.1271	0.1066	0.1414	0.389	0.3435	0.9389	0.4442	0.9788	0.8582
	4910			enterolactone sulfate	LC/MS neg	64041		HMDB0240506 HMDB0240505						0.81	0.94	0.74	0.28	0.6	1.16	0.9	0.34	0.73	0.78	0.3	0.63	0.38	0.81	2.13		0.0324	0.0628	0.2171	0.0908	0.4743	0.6261	0.4487	0.3097	0.3928	0.4921	0.4897	0.3	0.072	0.1162	0.7838	0.4915	0.9216	0.4406	0.9463	0.8541
	4914			equol sulfate	LC/MS neg	40478								0.36	0.22	0.27	0.73	0.38	0.61	0.75	2.01	1.04	1.23	3.3	1.71	2.68	1.39	0.52		0.0989	0.0923	0.5815	0.1941	0.5407	0.6261	0.3963	0.2891	0.0348	0.2101	0.117	0.1188	0.7366	0.3685	0.3095	0.3016	0.1904	0.1813	0.4596	0.7971
	4917			erythritol	LC/MS polar	20699	C00503	HMDB0002994	222285					0.91	0.97	0.87	0.81	0.93	1.07	0.96	0.9	1.03	0.9	0.84	0.96	0.93	1.07	1.14		0.3184	0.1673	0.5386	0.1826	0.1437	0.6099	0.2662	0.2308	0.6799	0.5904	0.1067	0.1145	0.0277	0.0992	0.323	0.3081	0.4801	0.3072	0.6027	0.8166
	4955			homostachydrine*	LC/MS pos early	33009	C08283	HMDB0033433	441447					0.81	0.92	1.06	0.7	0.68	1.15	1.31	0.86	0.85	1.14	0.75	0.74	0.66	0.65	0.98		0.2441	0.1442	0.913	0.2718	0.6634	0.6447	0.4681	0.3173	0.7428	0.6088	0.8263	0.4316	0.2304	0.2057	0.2271	0.2522	0.6895	0.3752	0.3462	0.7908
	4960			indolin-2-one	LC/MS pos early	43374	C12312		321710					0.55	0.39	0.27	0.72	0.63	0.71	0.49	1.32	1.16	0.69	1.86	1.64	2.71	2.38	0.88		0.0055	0.0379	0.0601	0.0342	0.5933	0.6354	0.1536	0.1615	0.0458	0.2368	0.0007	0.0056	0.5331	0.3115	0.3664	0.3336	0.5449	0.3311	0.0321	0.4708
	4981			mannonate*	LC/MS polar	62864			3246006					1.55	1.23	1.05	0.79	1	0.79	0.68	0.51	0.64	0.86	0.64	0.81	0.75	0.95	1.26		0.0901	0.089	0.291	0.1159	0.3498	0.6211	0.1207	0.1387	0.5266	0.5383	0.8734	0.444	0.2691	0.2222	0.7085	0.4675	0.3484	0.2555	0.1616	0.6879
	4986			methyl indole-3-acetate	LC/MS pos early	1584		HMDB0029738	74706					0.18	0.28	1.74	0.98	0.52	1.61	9.86	5.55	2.96	6.12	3.45	1.84	0.56	0.3	0.53		0.5553	0.2349	0.3722	0.1401	0.0041	0.3819	0.0135	0.0323	0.092	0.3086	0.5714	0.3368	0.9536	0.4294	0.1926	0.2298	0.3916	0.2739	0.0031	0.2729
	5086			stachydrine	LC/MS pos early	34384	C10172	HMDB0004827	115244					0.94	0.82	0.72	0.77	0.72	0.87	0.76	0.82	0.77	0.87	0.94	0.88	1.08	1.01	0.94		0.2216	0.1365	0.4766	0.1684	0.8618	0.6818	0.5075	0.3366	0.5433	0.5433	0.2306	0.18	0.1179	0.148	0.1245	0.1701	0.9559	0.4487	0.5856	0.8156
	5100			thymol sulfate	LC/MS neg	36095	C09908	HMDB0062720	12456386					1.33	1.66	1.32	1.39	1.96	1.25	0.99	1.04	1.47	0.79	0.84	1.18	1.05	1.49	1.42		0.3972	0.1954	0.9625	0.2815	0.7716	0.6585	0.8983	0.4778	0.3149	0.4631	0.6762	0.3781	0.4168	0.2749	0.2346	0.256	0.3791	0.2677	0.7717	0.8407
	5111			4-allylphenol sulfate	LC/MS neg	37181			66633409					0.35	1.41	0.96	0.22	0.34	4.01	2.74	0.63	0.96	0.68	0.16	0.24	0.23	0.35	1.54		0.3115	0.1666	0.4679	0.1671	0.7414	0.653	0.5628	0.3582	0.4803	0.5187	0.8726	0.444	0.3659	0.257	0.4715	0.3808	0.2028	0.1867	0.6751	0.8322
	5113			methyl glucopyranoside (alpha + beta)	LC/MS pos early	46144		HMDB0029965	445238;3036743;2108					0.33	0.83	0.37	0.58	0.29	2.52	1.12	1.76	0.9	0.44	0.7	0.35	1.57	0.8	0.51		0.0269	0.059	1.9903e-07	1.2848e-06	0.2313	0.6099	1.698e-05	0.0003	0.2983	0.4489	3.7222e-05	0.0009	0.0034	0.058	2.2165e-06	0.0001	0.0004	0.0032	0.7979	0.8407
	5140			pyrraline	LC/MS pos early	48428	C21013	HMDB0033143	14274616					0.91	0.8	0.51	0.63	0.81	0.88	0.56	0.69	0.89	0.63	0.78	1.01	1.23	1.59	1.29		0.1286	0.1068	0.4153	0.1531	0.6135	0.6447	0.5285	0.3457	0.2659	0.423	0.0331	0.0559	0.1085	0.1422	0.185	0.2239	0.6245	0.3535	0.1231	0.6579
	5143			daidzein sulfate (2)	LC/MS neg	48728			12114465					0.03	0.05	0.03	0.14	0.06	1.42	0.81	4.28	2.02	0.57	3.01	1.42	5.26	2.48	0.47		0.1754	0.1208	0.0264	0.0182	0.2748	0.6099	0.0116	0.0293	0.0263	0.1933	0.0076	0.0232	0.2911	0.2348	0.064	0.1134	0.7336	0.3867	0.8668	0.8419
	5150			N-acetylpyrraline	LC/MS pos early	48438	C01227							0.75	0.87	1.12	1	0.77	1.16	1.5	1.34	1.03	1.3	1.15	0.89	0.89	0.69	0.77		0.8611	0.3173	0.9598	0.281	0.2532	0.6099	0.3239	0.2592	0.1471	0.3528	0.8606	0.441	0.5228	0.309	0.3062	0.3008	0.633	0.3564	0.4158	0.7971
	5204			4-hydroxycinnamate	LC/MS neg	36770	C00811	HMDB0002035	637542					0.77	0.65	0.71	0.97	0.92	0.84	0.92	1.25	1.19	1.09	1.49	1.42	1.37	1.3	0.95		0.0415	0.0695	0.6401	0.2099	0.4716	0.6261	0.2604	0.2284	0.0221	0.1932	0.083	0.0971	0.8065	0.388	0.6003	0.4299	0.2199	0.1973	0.5263	0.8015
	5229			tartronate (hydroxymalonate)	LC/MS neg	20693	C02287	HMDB0035227	45					1.27	1.19	1.19	0.84	1.22	0.94	0.94	0.66	0.96	1.01	0.71	1.03	0.7	1.02	1.45		0.2936	0.1606	0.0435	0.0272	0.2828	0.6099	0.1688	0.172	0.2396	0.4034	0.2478	0.1893	0.2972	0.2364	0.2444	0.2617	0.8359	0.4202	0.8198	0.8407
	5237			3-indoleglyoxylic acid	LC/MS neg	63583			73863					0.51	0.89	1	0.75	0.69	1.75	1.98	1.48	1.36	1.13	0.84	0.77	0.75	0.69	0.92		0.1216	0.1048	0.0788	0.0421	0.0211	0.6099	0.0015	0.0086	0.5263	0.5383	0.7038	0.3868	0.0651	0.1162	0.0717	0.1213	0.0082	0.0265	0.0042	0.2782
	5239			methyl vanillate sulfate	LC/MS neg	63857								1.19	0.13	0.45	0.5	0.9	0.11	0.38	0.42	0.76	3.58	3.91	7.06	1.09	1.97	1.81		0.0004	0.012	0.0417	0.0262	0.656	0.6447	0.5163	0.3414	0.0006	0.068	0.0793	0.0949	0.213	0.1971	0.842	0.5041	9.3425e-05	0.001	0.0188	0.3896
	5241			vanillic acid glycine	LC/MS neg	63853		HMDB0060026	3083688					1.37	0.36	0.8	0.37	0.88	0.26	0.58	0.27	0.64	2.25	1.05	2.46	0.47	1.09	2.35		0.0199	0.0517	0.0212	0.0153	0.9522	0.7046	0.2087	0.1982	0.0611	0.2592	0.4973	0.3025	0.0779	0.1218	0.8675	0.5132	0.0028	0.0125	0.0571	0.5421
	5273			2-aminophenol sulfate	LC/MS neg	43266		HMDB0061116	181670					0.53	0.65	0.53	0.8	0.7	1.22	1	1.5	1.32	0.82	1.23	1.08	1.5	1.32	0.88		0.3817	0.1904	0.016	0.0122	0.2836	0.6099	0.0087	0.0254	0.0613	0.2592	0.0118	0.0296	0.3048	0.238	0.0624	0.1127	0.4037	0.2795	0.9034	0.8419
	5351		Bacterial/Fungal	N-methylpipecolate	LC/MS pos early	47101			11286529					1.54	1.33	1.74	1.15	1.34	0.87	1.13	0.75	0.87	1.3	0.86	1	0.66	0.77	1.16		0.3477	0.1787	0.0594	0.034	0.7991	0.6689	0.1203	0.1385	0.2449	0.4079	0.0261	0.0484	0.5585	0.3187	0.2258	0.252	0.6847	0.3745	0.4706	0.7971
	5984		Drug - Topical Agents	2,6-dihydroxybenzoic acid	LC/MS polar	63042		HMDB0013676	9338					0.1	0.39	0.19	0.51	0.12	3.83	1.93	5.05	1.21	0.5	1.32	0.32	2.61	0.63	0.24		0.4576	0.2132	1.5635e-06	7.5241e-06	0.1131	0.6099	1.7639e-05	0.0003	0.0223	0.1932	0.0001	0.0018	0.1402	0.1591	5.7175e-05	0.001	0.0148	0.0384	0.5379	0.8081
	6011		Drug - Other	S-carboxymethyl-cysteine	LC/MS pos early	47897	C03727	HMDB0029415	193653					0.63	0.85	0.75	0.67	0.73	1.34	1.18	1.06	1.16	0.88	0.79	0.86	0.9	0.98	1.09		0.5044	0.2241	0.1609	0.0725	0.1101	0.6099	0.0264	0.0496	0.2597	0.4205	0.0471	0.0687	0.0235	0.0965	0.1141	0.1637	0.2498	0.2134	0.7969	0.8407
	6089		Chemical	neopentyl glycol azelate**	LC/MS neg	64419								0.06	0.77	0.41	1.08	0.06	13.39	7.18	18.9	1.1	0.54	1.41	0.08	2.63	0.15	0.06		0.4362	0.2084	0.0003	0.0004	0.1115	0.6099	0.0003	0.0028	0.0358	0.2101	0.003	0.0128	0.0696	0.1162	0.0004	0.0041	0.0767	0.0998	0.416	0.7971
	6110			sulfate*	LC/MS neg	46960	C00059	HMDB01448	5152822					1.06	1.07	1	1	1.12	1	0.94	0.94	1.05	0.94	0.94	1.05	1	1.11	1.11		0.9403	0.3356	0.4512	0.1628	0.2548	0.6099	0.4521	0.3111	0.4131	0.4949	0.9592	0.4731	0.9049	0.4188	0.1957	0.2324	0.9463	0.4464	0.4223	0.7971
	6113			O-sulfo-tyrosine	LC/MS neg	45413		HMDB0155722	514186					0.7	0.56	1.91	2.02	1.11	0.8	2.72	2.86	1.58	3.4	3.58	1.98	1.05	0.58	0.55		0.4903	0.2203	0.7553	0.236	0.2338	0.6099	0.3634	0.2765	0.1257	0.3388	0.9532	0.4713	0.9546	0.4294	0.9896	0.5478	0.5216	0.3248	0.3947	0.7971
	6115			1-(3-aminopropyl)-2-pyrrolidone	LC/MS pos early	40506			82111					1.22	0.77	0.95	0.52	1.76	0.63	0.77	0.42	1.44	1.23	0.67	2.28	0.55	1.86	3.41		0.2105	0.1333	0.0028	0.0031	0.1582	0.6099	0.4555	0.3114	0.1265	0.3388	0.8599	0.441	0.0354	0.1031	0.2246	0.2518	0.0262	0.0516	0.3574	0.7908
	6117			ethyl glucuronide	LC/MS neg	39603		HMDB0010325	18392195					3.9	2.68	2.08	3.81	3.24	0.69	0.53	0.98	0.83	0.78	1.42	1.21	1.83	1.55	0.85		0.6693	0.2662	0.3695	0.1395	0.0801	0.6099	0.0219	0.0444	0.058	0.2575	0.2174	0.1741	0.0676	0.1162	0.0859	0.1374	0.6649	0.3699	0.2618	0.7483
	6162			S-(3-hydroxypropyl)mercapturic acid (HPMA)	LC/MS neg	44552			119083					0.85	0.68	0.7	0.6	0.94	0.8	0.83	0.71	1.11	1.03	0.89	1.38	0.86	1.34	1.56		0.0311	0.062	0.4211	0.1544	0.0363	0.6099	0.3607	0.2765	0.032	0.2012	0.0155	0.0349	0.0042	0.058	0.6812	0.4583	0.1999	0.1853	0.1152	0.6491
	6176			dimethyl sulfone	LC/MS pos early	43424	C11142	HMDB0004983	6213					1.12	0.5	0.6	0.34	0.38	0.45	0.53	0.3	0.34	1.19	0.68	0.75	0.57	0.63	1.1		8.73e-13	2.7684e-10	0.0699	0.0389	0.7714	0.6585	0.3945	0.2888	5.3185e-06	0.0033	0.0008	0.0056	1.7139e-09	6.8849e-07	1.4078e-08	7.0371e-06	3.7531e-07	1.9784e-05	6.1081e-05	0.0482
	6179			EDTA	LC/MS pos early	22163	C00284	HMDB0015109	6049					1.3	1.07	0.92	1.24	1.2	0.82	0.71	0.95	0.92	0.87	1.16	1.12	1.34	1.3	0.97		0.6346	0.2581	0.9489	0.28	0.3916	0.6261	0.2904	0.243	0.7545	0.6093	0.6401	0.364	0.5027	0.3019	0.7819	0.4915	0.4534	0.2978	0.1312	0.6633
	6183			glycolate (hydroxyacetate)	LC/MS polar	15737	C00160	HMDB0000115	757					0.87	0.91	0.86	0.91	0.82	1.05	0.99	1.05	0.94	0.95	1	0.9	1.06	0.95	0.9		0.6696	0.2662	0.5996	0.1992	0.9949	0.712	0.7432	0.4312	0.5595	0.5492	0.421	0.2749	0.5861	0.3262	0.368	0.3341	0.7972	0.4065	0.6315	0.8241
	6199			2-naphthol sulfate	LC/MS neg	62520			74428					0.49	0.61	0.68	0.4	0.37	1.25	1.38	0.82	0.74	1.11	0.66	0.6	0.59	0.54	0.91		0.2362	0.143	0.7748	0.2413	0.6776	0.6448	0.4856	0.3249	0.6486	0.5842	0.9502	0.4703	0.2497	0.2135	0.1457	0.1889	0.8078	0.4094	0.4478	0.7971
	6201			2,4-di-tert-butylphenol	LC/MS neg	64328								1.48	1.21	1.4	0.66	1.19	0.82	0.95	0.44	0.81	1.16	0.54	0.99	0.47	0.85	1.82		0.0318	0.0622	0.0003	0.0004	0.3426	0.6211	0.0199	0.041	0.3782	0.4921	0.0387	0.0618	0.0561	0.1139	0.1778	0.2173	0.1311	0.1444	0.7724	0.8407
	6214			perfluorooctanesulfonate (PFOS)	LC/MS neg	57564	C18142	HMDB0059586	74483					0.63	1.08	0.7	0.97	0.64	1.71	1.11	1.54	1.01	0.65	0.9	0.59	1.39	0.91	0.66		0.5707	0.2398	3.8743e-05	9.7663e-05	0.9816	0.7119	0.0135	0.0323	0.4482	0.5083	0.0434	0.0662	0.9981	0.4401	0.0115	0.0394	0.0018	0.0089	0.6159	0.8166
	6234			4-methylbenzenesulfonate	LC/MS neg	43592	C06677	HMDB0059933	85570					0.89	1.39	1	0.9	1.04	1.56	1.12	1.01	1.17	0.72	0.65	0.75	0.91	1.05	1.15		0.3486	0.1787	0.6294	0.2072	0.3621	0.6211	0.5344	0.3482	0.2425	0.4054	0.9184	0.4603	0.539	0.312	0.8047	0.4948	0.0778	0.1006	0.4698	0.7971
	6237			4-hydroxychlorothalonil	LC/MS neg	48441		HMDB0240624	34217					1.73	1.06	1.82	0.71	1.59	0.62	1.05	0.41	0.92	1.71	0.67	1.49	0.39	0.87	2.24		0.418	0.2031	8.3128e-05	0.0002	0.4357	0.6261	0.0364	0.0624	0.9808	0.6763	0.0629	0.082	0.1206	0.149	0.0505	0.0985	0.0384	0.0669	0.8003	0.8407
	6245			3-hydroxypyridine sulfate	LC/MS neg	48448								0.16	0.55	0.26	0.95	0.15	3.54	1.69	6.14	0.97	0.48	1.74	0.28	3.63	0.58	0.16		0.3876	0.1924	3.9199e-07	2.1615e-06	0.1335	0.6099	1.0865e-05	0.0002	0.0293	0.1985	7.481e-05	0.0013	0.0912	0.1311	9.6537e-06	0.0003	0.0075	0.0248	0.5291	0.8015
	6259			6-hydroxyindole sulfate	LC/MS neg	48698		HMDB0000682	122198196					0.9	0.72	0.58	0.79	1.07	0.81	0.65	0.89	1.2	0.81	1.1	1.48	1.36	1.84	1.35		0.0766	0.0846	0.4729	0.1677	0.355	0.6211	0.7878	0.4471	0.3363	0.4763	0.0175	0.0369	0.4268	0.2777	0.7872	0.4915	0.4863	0.3093	0.0328	0.4708
	6262			4-acetamidobenzoate	LC/MS neg	57585	D03836		6918889					0.67	1.01	0.67	0.83	0.67	1.52	1	1.25	1	0.66	0.82	0.66	1.25	1	0.8		0.6901	0.2713	0.009	0.0079	0.6901	0.6482	0.0609	0.0903	0.9798	0.6763	0.0609	0.0809	0.302	0.2374	0.0609	0.1112	0.0578	0.0855	1	0.8658
	6263			thioproline	LC/MS pos early	53231		HMDB0062164	93176					1.18	1.01	0.86	0.78	1.23	0.86	0.73	0.66	1.05	0.86	0.77	1.22	0.9	1.43	1.59		0.4409	0.2085	0.44	0.1595	0.239	0.6099	0.6273	0.3864	0.903	0.6565	0.3682	0.2514	0.1697	0.1753	0.8038	0.4948	0.5441	0.3311	0.1697	0.6904
	6270			2,2'-methylenebis(6-tert-butyl-p-cresol)	LC/MS polar	62885			8398					0.44	2.1	2.91	0.85	0.44	4.8	6.65	1.94	1	1.38	0.4	0.21	0.29	0.15	0.52		0.0136	0.0471	0.3049	0.119	0.6541	0.6447	0.2984	0.2458	0.2144	0.3901	0.1658	0.1473	0.876	0.4082	0.2984	0.2971	0.0262	0.0516	0.0184	0.3896
	6284			3-bromo-5-chloro-2,6-dihydroxybenzoic acid*	LC/MS neg	63681			134581543					0.84	1.33	1.05	0.8	0.62	1.58	1.24	0.95	0.73	0.79	0.6	0.46	0.76	0.59	0.77		0.0102	0.0451	0.1655	0.0743	0.9888	0.7119	0.3554	0.2765	0.4405	0.5051	0.9624	0.4736	0.1528	0.1672	0.0311	0.0705	0.0947	0.1169	0.3318	0.7818
	6290			4-chlorobenzoic acid	LC/MS neg	63988	C02370		6318					0.94	1.06	2.06	1.21	1.07	1.13	2.19	1.29	1.14	1.94	1.14	1.01	0.59	0.52	0.88		0.1816	0.1223	0.2445	0.0999	0.5243	0.6261	0.7453	0.4315	0.534	0.5416	0.0314	0.0546	0.7074	0.3611	0.6277	0.4404	0.7654	0.3958	0.0639	0.5421
	6406	Partially Characterized Molecules	Partially Characterized Molecules	glucuronide of C10H18O2 (12)*	LC/MS neg	61892								0.3	0.45	0.44	0.88	0.42	1.54	1.5	2.98	1.42	0.98	1.94	0.93	1.98	0.95	0.48		0.8076	0.3024	0.0475	0.0289	0.3173	0.6149	0.0426	0.0697	0.2075	0.3834	0.2139	0.1728	0.9402	0.4282	0.1308	0.1748	0.4183	0.2855	0.4081	0.7971
	6435			glycine conjugate of C6H10O2 (2)*	LC/MS neg	63653								1.31	0.94	0.98	0.94	1.35	0.72	0.75	0.72	1.04	1.04	1	1.44	0.96	1.39	1.44		0.3913	0.1937	0.2241	0.0933	0.5708	0.6289	0.2731	0.2351	0.7465	0.6088	0.6327	0.3632	0.7347	0.3682	0.404	0.3488	0.1589	0.1608	0.1195	0.6579
	6436			glycine conjugate of C6H10O2 (3)*	LC/MS neg	63654								1.6	1.4	1.58	1.88	1.72	0.88	0.99	1.18	1.08	1.13	1.34	1.23	1.19	1.09	0.92		0.1076	0.0975	0.38	0.1429	0.3117	0.6131	0.1044	0.1267	0.1405	0.3482	0.0655	0.0846	0.0125	0.0786	0.0419	0.087	0.8747	0.4319	0.8163	0.8407
	6442			glycine conjugate of C10H14O2 (1)*	LC/MS neg	62146								0.96	1.91	0.87	1.33	0.95	1.99	0.91	1.38	0.99	0.46	0.7	0.5	1.52	1.09	0.72		0.6171	0.2536	0.243	0.0994	0.3086	0.6105	0.8758	0.4719	0.098	0.3086	0.8165	0.4274	0.7427	0.3695	0.9602	0.5411	0.1319	0.1448	0.698	0.8407
	6447			pentose acid*	LC/MS polar	63264	C00803	HMDB0000892	7991					1.03	0.89	0.86	0.86	0.86	0.86	0.84	0.84	0.84	0.97	0.97	0.97	1	1	1		0.0984	0.0921	0.9509	0.2803	0.8857	0.6851	0.7016	0.4167	0.3545	0.4915	0.2194	0.1748	0.2194	0.2	0.2315	0.2556	0.1938	0.1836	0.1105	0.6317
	6454			branched-chain, straight-chain, or cyclopropyl 10:1 fatty acid (1)*	LC/MS neg	63615								0.92	0.75	0.73	1.62	0.91	0.82	0.79	1.76	0.99	0.97	2.14	1.21	2.21	1.25	0.56		0.0202	0.0517	0.2833	0.1131	0.2329	0.6099	0.9932	0.5031	0.2321	0.4009	0.3027	0.2209	0.0555	0.1139	0.9456	0.538	0.2354	0.2073	0.3067	0.7701
	6455			branched-chain, straight-chain, or cyclopropyl 10:1 fatty acid (2)*	LC/MS neg	63616								0.45	0.76	0.47	1.05	0.49	1.69	1.05	2.34	1.1	0.62	1.38	0.65	2.22	1.05	0.47		0.6056	0.2512	3.4065e-05	8.9272e-05	0.6754	0.6447	0.0026	0.0123	0.2717	0.4272	0.0033	0.0135	0.9824	0.4371	0.0062	0.0261	0.0408	0.0699	0.9242	0.8477
	6457			branched-chain, straight-chain, or cyclopropyl 12:1 fatty acid*	LC/MS neg	63683								9.05	1.01	8.7	3.1	10.48	0.11	0.96	0.34	1.16	8.6	3.07	10.36	0.36	1.2	3.38		0.0713	0.0834	8.9688e-11	2.783e-09	0.4679	0.6261	4.5547e-07	3.2197e-05	0.9248	0.6595	8.0854e-06	0.0004	0.0446	0.1102	1.6643e-07	1.6639e-05	6.0992e-07	2.5721e-05	0.3559	0.7908
	6468			bilirubin degradation product, C16H18N2O5 (2)**	LC/MS neg	64404								0.55	0.91	0.75	1.14	0.66	1.65	1.37	2.07	1.2	0.83	1.25	0.73	1.51	0.88	0.58		0.7362	0.2845	0.1925	0.0837	0.2799	0.6099	0.1702	0.1727	0.3013	0.4498	0.6274	0.361	0.6389	0.3413	0.3302	0.3115	0.7279	0.386	0.369	0.7908
	6469			bilirubin degradation product, C17H18N2O4 (1)**	LC/MS neg	64409								0.46	0.74	0.47	1.34	0.79	1.6	1.03	2.89	1.72	0.64	1.81	1.07	2.82	1.67	0.59		0.3844	0.1915	0.4739	0.1677	0.9943	0.712	0.6205	0.3828	0.8822	0.6526	0.583	0.3423	0.4715	0.2938	0.7075	0.4675	0.7282	0.386	0.9569	0.8541
	6470			bilirubin degradation product, C17H18N2O4 (2)**	LC/MS neg	64407								0.38	0.68	0.46	1.17	0.58	1.79	1.19	3.06	1.51	0.67	1.71	0.84	2.56	1.26	0.49		0.5213	0.2269	0.2393	0.098	0.9573	0.7068	0.3757	0.2834	0.746	0.6088	0.4258	0.2768	0.5932	0.3278	0.8758	0.5163	0.5718	0.3392	0.9277	0.8477
	6471			bilirubin degradation product, C17H18N2O4 (3)**	LC/MS neg	64408								0.66	0.84	0.78	1.29	0.98	1.26	1.17	1.93	1.48	0.93	1.53	1.17	1.65	1.26	0.76		0.5348	0.2291	0.7167	0.2293	0.9561	0.7067	0.6674	0.4039	0.7749	0.6145	0.7667	0.4112	0.6011	0.3299	0.7373	0.478	0.8854	0.4351	0.8939	0.8419
	6472			bilirubin degradation product, C17H20N2O5 (1)**	LC/MS neg	64405								0.2	0.65	0.38	1.25	0.45	3.2	1.87	6.18	2.24	0.58	1.93	0.7	3.31	1.2	0.36		0.356	0.1822	0.1306	0.0625	0.3156	0.6149	0.1108	0.1313	0.41	0.494	0.6386	0.3636	0.4019	0.2682	0.5815	0.4253	0.4282	0.2871	0.2532	0.7483
	6473			bilirubin degradation product, C17H20N2O5 (2)**	LC/MS neg	64406								0.29	0.72	0.54	1.33	0.59	2.51	1.89	4.66	2.08	0.75	1.86	0.83	2.47	1.1	0.45		0.3024	0.1632	0.229	0.0947	0.2841	0.6099	0.187	0.1862	0.5471	0.5442	0.9971	0.4778	0.2727	0.2231	0.7869	0.4915	0.4658	0.3019	0.1859	0.7154
	6474			bilirubin degradation product, C16H18N2O5 (3)**	LC/MS neg	64414								0.43	0.71	0.43	1.05	0.44	1.67	1	2.48	1.04	0.6	1.48	0.62	2.46	1.04	0.42		0.446	0.21	0.027	0.0185	0.5524	0.6261	0.1771	0.1777	0.4324	0.5048	0.1929	0.1612	0.3816	0.2633	0.2384	0.2586	0.5636	0.3366	0.9605	0.8558
	6476			glutamine_degradant*	LC/MS pos early	46225								0.91	0.85	0.69	1.3	0.82	0.94	0.76	1.43	0.91	0.81	1.53	0.97	1.88	1.19	0.63		0.0672	0.0825	0.0204	0.0149	0.2936	0.6099	0.5889	0.3699	0.4073	0.494	0.0775	0.094	0.0978	0.134	0.3352	0.315	0.7712	0.3976	0.2115	0.7205
[truncated: 42 more columns]
