# Supplementary material for: Developmental programming of Kupffer cells by maternal obesity causes fatty liver disease in the offspring
Source: Research Square preprint supplement (doi:10.21203/rs.3.rs-3242837/v1), 2023-08-11
Supplement: Supplementary file 5 [file 503cbaaa70dd8f5a798fcc8b.xlsx]

## Sheet: Sheet1
	ID	Description	GeneRatio	BgRatio	pvalue	p.adjust	qvalue	geneID	Count	GeneRatio_perc
GO:0006631	GO:0006631	fatty acid metabolic process	53/480	358/12957	2.77329e-18	1.05329e-14	9.82035e-15	Insig2/Cyp2a5/Acaa1b/Mapk9/Acox1/Akr1c6/Hacl1/Ephx2/Cyp2d26/Fabp2/Rgn/Asah2/Cyp2e1/Pecr/Dbi/Phyh/Abcb11/Hao1/Decr1/Angptl3/Scp2/Mfsd2a/Acadsb/Hpgd/Apoa1/Cyp1a2/Etfa/Elovl5/Cyp2c38/Faah/Scd1/Pex2/Acacb/Cyp2c37/Insig1/Cyp2j5/Cyp2j6/Cyp2f2/Fabp1/Cyp2c50/Ces1c/Acnat2/Cyp2a12/Cyp2c70/Cyp2d22/Ces1e/Cyp4a32/Cyp4a12a/Cyp2c54/Cyp2d11/Cyp2d9/Acad11/Cyp2d10	53	0.1104
GO:0008202	GO:0008202	steroid metabolic process	40/480	257/12957	8.72054e-15	6.62412e-12	6.17598e-12	Pon1/Insig2/Apoa2/Acaa1b/Ywhah/Apob/Akr1c6/Ebpl/Ephx2/Sqle/Cyp26a1/Cyp2e1/Abcb11/Cat/Bmp2/Mttp/Angptl3/Scp2/Cyp3a25/Sult2a8/Msmo1/Hsd17b2/Sc5d/Fdx1/Apoa1/Cyp1a2/Lcat/Gc/Igfbp7/Scd1/Rdh7/Pex2/Insig1/Ugt2b5/Ces1c/Cyp3a59/Cyp2d22/Ces1e/Saa1/Ugt1a1	40	0.0833
GO:0071466	GO:0071466	cellular response to xenobiotic stimulus	27/480	123/12957	4.57613e-14	2.48288e-11	2.3149e-11	Cyp2a5/Acaa1b/Cyp2d26/Cyp26a1/Cyp2e1/Abcb11/Sult2a8/Cyp1a2/Cyp2c38/Fmo1/Cyp2c37/Cyp2j5/Rap1b/Cyp2j6/Cyp2f2/Cyp2c50/Cyp2a12/Cyp2c70/Cyp2d22/Aox1/Cyp2c54/Cyp2d11/Cyp2d9/Rap1a/Prnp/Ugt1a1/Cyp2d10	27	0.0562
GO:0019369	GO:0019369	arachidonic acid metabolic process	18/480	51/12957	1.13476e-13	5.38726e-11	5.02279e-11	Cyp2a5/Cyp2d26/Cyp2e1/Cyp2c38/Cyp2c37/Cyp2j5/Cyp2j6/Cyp2f2/Cyp2c50/Cyp2a12/Cyp2c70/Cyp2d22/Cyp4a32/Cyp4a12a/Cyp2c54/Cyp2d11/Cyp2d9/Cyp2d10	18	0.0375
GO:0072378	GO:0072378	blood coagulation, fibrin clot formation	10/480	16/12957	2.91083e-11	8.50409e-09	7.92876e-09	Apoh/Serpinc1/F2/Fga/Gp9/F9/F8/Fgb/Fgg/Klkb1	10	0.0208
GO:0006066	GO:0006066	alcohol metabolic process	35/480	279/12957	2.29569e-10	5.81269e-08	5.41944e-08	Pon1/Insig2/Apoa2/Moxd1/Apob/Akr1c6/Ephx2/Sqle/Asah2/Rbp4/Pecr/Cat/Hao1/Bmp2/Mttp/Angptl3/Scp2/Sult2a8/Msmo1/Sc5d/Fdx1/Pts/Apoa1/Cyp1a2/Tkfc/Lcat/Pex2/Insig1/Aldh1a1/Ces1c/Ttr/Ces1e/Rdh11/Saa1/Adh1	35	0.0729
GO:0072376	GO:0072376	protein activation cascade	10/480	21/12957	1.08437e-09	2.4226e-07	2.2587e-07	Apoh/Serpinc1/F2/Fga/Gp9/F9/F8/Fgb/Fgg/Klkb1	10	0.0208
GO:0016054	GO:0016054	organic acid catabolic process	28/480	200/12957	1.26219e-09	2.66322e-07	2.48304e-07	Pon1/Sardh/Acaa1b/Acox1/Blmh/Glud1/Hacl1/Cyp26a1/Dbi/Phyh/Abcb11/Hao1/Decr1/Scp2/Mfsd2a/Aldh1l1/Sult2a8/Acadsb/Oat/Otc/Ldhd/Etfa/Faah/Pex2/Acacb/Fabp1/Abat/Acad11	28	0.0583
GO:0016042	GO:0016042	lipid catabolic process	32/480	257/12957	1.6801e-09	3.35843e-07	3.13122e-07	Apoh/Pla1a/Apoa2/Acaa1b/Ywhah/Apob/Acox1/Hacl1/Asah2/Cyp26a1/Cps1/Dbi/Phyh/Abcb11/Hao1/Aadac/Decr1/Angptl3/Scp2/Mfsd2a/Sult2a8/Apoa1/Cyp1a2/Etfa/Faah/Pex2/Acacb/Adora1/Fabp1/Ces1c/Ces1e/Acad11	32	0.0667
GO:0002428	GO:0002428	antigen processing and presentation of peptide antigen via MHC class Ib	9/480	20/12957	1.42392e-08	2.35132e-06	2.19224e-06	Azgp1/H2-Q7/H2-Q9/B2m/H2-Q10/H2-Q6/H2-Q1/H2-Q2/Gm7030	9	0.0187
GO:0044242	GO:0044242	cellular lipid catabolic process	25/480	189/12957	3.14691e-08	4.97998e-06	4.64307e-06	Apoh/Apoa2/Acaa1b/Apob/Acox1/Hacl1/Asah2/Cyp26a1/Cps1/Dbi/Phyh/Abcb11/Hao1/Aadac/Decr1/Angptl3/Scp2/Mfsd2a/Apoa1/Etfa/Faah/Pex2/Acacb/Fabp1/Acad11	25	0.0521
GO:0042730	GO:0042730	fibrinolysis	8/480	18/12957	1.05587e-07	1.38283e-05	1.28928e-05	Apoh/Hrg/F2/Fga/Fgb/Fgg/Serpinf2/Klkb1	8	0.0167
GO:0002483	GO:0002483	antigen processing and presentation of endogenous peptide antigen	9/480	26/12957	2.17104e-07	2.42517e-05	2.2611e-05	Azgp1/H2-Q7/H2-Q9/B2m/H2-Q10/H2-Q6/H2-Q1/H2-Q2/Gm7030	9	0.0187
GO:0006520	GO:0006520	cellular amino acid metabolic process	27/480	239/12957	2.45389e-07	2.66282e-05	2.48267e-05	Sardh/Gamt/Adi1/Blmh/Glud1/Keg1/Cps1/Dars/Iars2/Gatb/Acadsb/Oat/Otc/Ctps2/Gpt2/Etfa/Slc16a2/Lars2/Kyat3/Pm20d1/Nags/Aldh1a1/Abat/Cyp2d22/Glyat/Gm4952/Bhmt	27	0.0562
GO:0030258	GO:0030258	lipid modification	22/480	176/12957	5.7524e-07	5.46191e-05	5.09239e-05	Apoa2/Acaa1b/Acox1/Hacl1/Ephx2/Sacm1l/Cyp2e1/Dbi/Phyh/Abcb11/Hao1/Decr1/Scp2/Mfsd2a/Apoa1/Etfa/Lcat/Scd1/Pex2/Acacb/Fabp1/Acad11	22	0.0458
GO:0042445	GO:0042445	hormone metabolic process	19/480	137/12957	6.87765e-07	6.37105e-05	5.94003e-05	Hif1a/Akr1c6/Yipf5/Cyp26a1/Rbp4/Bmp2/Scp2/Sult2a8/Pcsk6/Hsd17b2/Fdx1/Cyp1a2/Slc16a2/Aldh1a1/Cyp2d22/Ttr/Rdh11/Adh1/Ugt1a1	19	0.0396
GO:0006869	GO:0006869	lipid transport	29/480	288/12957	1.00591e-06	8.88479e-05	8.2837e-05	Apoh/Apoa2/Fabp7/Mapk9/Sar1b/Apob/Atp5j/Fabp2/Vapa/Rbp4/Dbi/Abcb11/Mttp/Scp2/Mfsd2a/Abcg2/Arl8b/Aqp8/Apoa1/Aqp9/Lcat/Abcg5/Slco1a1/Gltpd2/Cyp2j5/Fabp1/Ces1c/Ces1e/Ttpa	29	0.0604
GO:0022900	GO:0022900	electron transport chain	15/480	94/12957	1.71775e-06	0.000148273	0.000138242	Cox5a/Uqcrb/Ndufa5/Ndufv2/Mtch2/Fdx1/Etfa/ND1/COX1/COX3/ND4/ND5/CYTB/ND4L/Chchd2	15	0.0312
GO:0006638	GO:0006638	neutral lipid metabolic process	17/480	122/12957	2.48115e-06	0.000192314	0.000179304	Apoh/Insig2/Apoa2/Apob/Rgn/Cyp2e1/Cps1/Dbi/Cat/Aadac/Mttp/Angptl3/Mfsd2a/Apoa1/Faah/Scd1/Insig1	17	0.0354
GO:0045834	GO:0045834	positive regulation of lipid metabolic process	19/480	150/12957	2.77595e-06	0.00020653	0.000192558	Apoh/Apoa2/Chp1/Mapk9/Rgn/Dbi/F2/Aadac/Angptl3/Scp2/Mfsd2a/Apoa1/Elovl5/Scd1/Adora1/Fabp1/Ces1c/Ces1e/Mup1	19	0.0396
GO:0050819	GO:0050819	negative regulation of coagulation	10/480	43/12957	2.82769e-06	0.00020653	0.000192558	Apoh/Hrg/Tfpi/F2/Fga/Fgb/Fgg/Serpinf2/Abat/Klkb1	10	0.0208
GO:1900047	GO:1900047	negative regulation of hemostasis	10/480	43/12957	2.82769e-06	0.00020653	0.000192558	Apoh/Hrg/Tfpi/F2/Fga/Fgb/Fgg/Serpinf2/Abat/Klkb1	10	0.0208
GO:0042773	GO:0042773	ATP synthesis coupled electron transport	12/480	65/12957	3.92459e-06	0.000249781	0.000232883	Cox5a/Uqcrb/Ndufv2/Mtch2/ND1/COX1/COX3/ND4/ND5/CYTB/ND4L/Chchd2	12	0.025
GO:0006720	GO:0006720	isoprenoid metabolic process	12/480	66/12957	4.63801e-06	0.000268744	0.000250562	Cyp26a1/Rbp4/Cyp2e1/Pecr/Phyh/Cyp1a2/Cyp2j6/Aldh1a1/Idi1/Ttr/Rdh11/Adh1	12	0.025
GO:0050994	GO:0050994	regulation of lipid catabolic process	11/480	56/12957	5.28999e-06	0.000299872	0.000279584	Apoh/Apoa2/Dbi/Abcb11/Aadac/Angptl3/Mfsd2a/Apoa1/Acacb/Adora1/Fabp1	11	0.0229
GO:0001913	GO:0001913	T cell mediated cytotoxicity	10/480	48/12957	8.1679e-06	0.000430857	0.000401708	Hprt/Azgp1/H2-Q7/H2-Q9/B2m/H2-Q10/H2-Q6/H2-Q1/H2-Q2/Gm7030	10	0.0208
GO:0061045	GO:0061045	negative regulation of wound healing	11/480	59/12957	8.99328e-06	0.000467897	0.000436242	Apoh/Hrg/Tfpi/F2/Fga/Phldb2/Fgb/Fgg/Serpinf2/Abat/Klkb1	11	0.0229
GO:0002474	GO:0002474	antigen processing and presentation of peptide antigen via MHC class I	9/480	39/12957	9.58079e-06	0.000491728	0.000458461	Azgp1/H2-Q7/H2-Q9/B2m/H2-Q10/H2-Q6/H2-Q1/H2-Q2/Gm7030	9	0.0187
GO:0030193	GO:0030193	regulation of blood coagulation	11/480	60/12957	1.065e-05	0.000525306	0.000489768	Apoh/Hrg/Serpinc1/Tfpi/F2/Fga/Fgb/Fgg/Serpinf2/Abat/Klkb1	11	0.0229
GO:0015980	GO:0015980	energy derivation by oxidation of organic compounds	26/480	276/12957	1.22503e-05	0.000560564	0.00052264	Cox5a/Atp5pb/Ugp2/Mdh1/Hif1a/Uqcrb/Atp5j/Ndufa5/Ndufv2/Coq10b/Cat/Mtch2/Ak4/Cyp1a2/Etfa/Suclg2/ND1/COX1/COX3/ND4/ND5/CYTB/ND4L/Ppp1r3c/Chchd2/Mup1	26	0.0542
GO:0051180	GO:0051180	vitamin transport	8/480	31/12957	1.24371e-05	0.000561465	0.00052348	Slc25a32/Slc23a1/Rbp4/Afm/Abcg2/Apoa1/Gc/Ttpa	8	0.0167
GO:0050818	GO:0050818	regulation of coagulation	11/480	63/12957	1.73107e-05	0.000738718	0.000688741	Apoh/Hrg/Serpinc1/Tfpi/F2/Fga/Fgb/Fgg/Serpinf2/Abat/Klkb1	11	0.0229
GO:1903035	GO:1903035	negative regulation of response to wounding	12/480	76/12957	2.08842e-05	0.000862153	0.000803825	Apoh/D130043K22Rik/Hrg/Tfpi/F2/Fga/Phldb2/Fgb/Fgg/Serpinf2/Abat/Klkb1	12	0.025
GO:0010038	GO:0010038	response to metal ion	22/480	226/12957	3.45867e-05	0.00136834	0.00127577	Cp/Cyp2a5/Atp7b/Mapk9/Glud1/Hrg/Sumo1/Fga/Abcc6/Aqp9/Cyp1a2/Fgb/Fgg/Lcat/Abat/B2m/CYTB/Serpina1d/Serpina1b/Serpina1e/Serpina1c/Prnp	22	0.0458
GO:0046165	GO:0046165	alcohol biosynthetic process	14/480	114/12957	7.95782e-05	0.00290613	0.00270952	Insig2/Moxd1/Apob/Asah2/Bmp2/Scp2/Msmo1/Sc5d/Pts/Apoa1/Pex2/Insig1/Ces1c/Ces1e	14	0.0292
GO:0042572	GO:0042572	retinol metabolic process	6/480	21/12957	8.4547e-05	0.00305819	0.00285129	Rbp4/Cyp1a2/Aldh1a1/Ttr/Rdh11/Adh1	6	0.0125
GO:0019646	GO:0019646	aerobic electron transport chain	9/480	51/12957	9.26587e-05	0.00331998	0.00309537	Cox5a/Uqcrb/Ndufv2/ND1/COX1/COX3/ND4/ND5/CYTB	9	0.0187
GO:0010565	GO:0010565	regulation of cellular ketone metabolic process	15/480	131/12957	0.000100502	0.00356737	0.00332602	Insig2/Mapk9/Rgn/Dbi/Abcb11/Bmp2/Mfsd2a/Apoa1/Elovl5/Acacb/Insig1/Fabp1/Ces1c/Ces1e/Ugt1a1	15	0.0312
GO:0062012	GO:0062012	regulation of small molecule metabolic process	26/480	315/12957	0.000116111	0.00404577	0.00377206	Insig2/Mapk9/Apob/Hif1a/Ephx2/Rgn/Dbi/Abcb11/Mtch2/Bmp2/Ak4/Scp2/Mfsd2a/Cda/Apoa1/Elovl5/Pex2/Acacb/Insig1/Cyp2j6/Fabp1/Ces1c/Ces1e/Ppp1r3c/Mup1/Ugt1a1	26	0.0542
GO:0046890	GO:0046890	regulation of lipid biosynthetic process	17/480	168/12957	0.000165887	0.00557558	0.00519837	Insig2/Chp1/Mapk9/Apob/Rgn/Dbi/Bmp2/Scp2/Mfsd2a/Apoa1/Elovl5/Igfbp7/Pex2/Insig1/Ces1c/Ces1e/Mup1	17	0.0354
GO:0016053	GO:0016053	organic acid biosynthetic process	22/480	252/12957	0.000174139	0.00580159	0.0054091	Insig2/Gamt/Mapk9/Adi1/Rgn/Asah2/Pecr/Otc/Apoa1/Elovl5/Scd1/Pex2/Acacb/Insig1/Nags/Aldh1a1/Ces1c/Abat/Ces1e/Cyp4a32/Cyp4a12a/Bhmt	22	0.0458
GO:0001912	GO:0001912	positive regulation of leukocyte mediated cytotoxicity	10/480	69/12957	0.000211693	0.00687086	0.00640602	Crtam/Azgp1/H2-Q7/H2-Q9/B2m/H2-Q10/H2-Q6/H2-Q1/H2-Q2/Gm7030	10	0.0208
GO:1901617	GO:1901617	organic hydroxy compound biosynthetic process	17/480	173/12957	0.000236274	0.0075409	0.00703073	Insig2/Moxd1/Apob/Sqle/Epas1/Asah2/Bmp2/Scp2/Msmo1/Sc5d/Pts/Apoa1/Pex2/Insig1/Ces1c/Cyp2d22/Ces1e	17	0.0354
GO:0008206	GO:0008206	bile acid metabolic process	7/480	37/12957	0.000359137	0.010912	0.0101737	Acaa1b/Abcb11/Scp2/Sult2a8/Pex2/Ces1c/Ces1e	7	0.0146
GO:1905952	GO:1905952	regulation of lipid localization	14/480	132/12957	0.000379937	0.0112134	0.0104548	Apoa2/Mapk9/Sar1b/Apob/Atp5j/Dbi/Scp2/Apoa1/Abcg5/Acacb/Cyp2j5/Ces1c/Ces1e/Mup1	14	0.0292
GO:0007599	GO:0007599	hemostasis	15/480	150/12957	0.000449728	0.0126523	0.0117964	Apoh/Hrg/Serpinc1/Tfpi/F2/Fga/Gp9/F9/F8/Proz/Fgb/Fgg/Serpinf2/Abat/Klkb1	15	0.0312
GO:0031343	GO:0031343	positive regulation of cell killing	10/480	76/12957	0.000471682	0.0131724	0.0122812	Crtam/Azgp1/H2-Q7/H2-Q9/B2m/H2-Q10/H2-Q6/H2-Q1/H2-Q2/Gm7030	10	0.0208
GO:0001909	GO:0001909	leukocyte mediated cytotoxicity	13/480	120/12957	0.000496219	0.0136264	0.0127045	Hprt/F2/Arl8b/Crtam/Azgp1/H2-Q7/H2-Q9/B2m/H2-Q10/H2-Q6/H2-Q1/H2-Q2/Gm7030	13	0.0271
GO:0062014	GO:0062014	negative regulation of small molecule metabolic process	10/480	80/12957	0.000713178	0.0188101	0.0175375	Insig2/Dbi/Mtch2/Bmp2/Mfsd2a/Cda/Acacb/Insig1/Mup1/Ugt1a1	10	0.0208
GO:0042908	GO:0042908	xenobiotic transport	6/480	31/12957	0.000837501	0.0214921	0.0200381	Slc22a18/Slc47a1/Slc22a1/Abcb11/Abcg2/Abcc6	6	0.0125
GO:0050892	GO:0050892	intestinal absorption	6/480	31/12957	0.000837501	0.0214921	0.0200381	Apoa2/Fabp2/Abcg2/Apoa1/Abcg5/Fabp1	6	0.0125
GO:0034377	GO:0034377	plasma lipoprotein particle assembly	5/480	22/12957	0.00106639	0.0270009	0.0251742	Apoa2/Mttp/Mfsd2a/Apoa1/Lcat	5	0.0104
GO:0031341	GO:0031341	regulation of cell killing	11/480	101/12957	0.00126303	0.0315591	0.0294241	Cr1l/Crtam/Azgp1/H2-Q7/H2-Q9/B2m/H2-Q10/H2-Q6/H2-Q1/H2-Q2/Gm7030	11	0.0229
GO:0018958	GO:0018958	phenol-containing compound metabolic process	9/480	72/12957	0.00130409	0.0319706	0.0298077	Moxd1/Ly6e/Epas1/Cyp2e1/Hprt/Sult2a8/Slc16a2/Abat/Cyp2d22	9	0.0187
GO:0097305	GO:0097305	response to alcohol	12/480	117/12957	0.00131092	0.0319706	0.0298077	Hnrnpk/Hpgd/Fdx1/Aldh1a1/Ces1c/Abat/Ces1e/Serpina1d/Serpina1b/Serpina1e/Adh1/Serpina1c	12	0.025
GO:0034369	GO:0034369	plasma lipoprotein particle remodeling	5/480	23/12957	0.00132159	0.0319706	0.0298077	Apoa2/Apob/Mttp/Apoa1/Lcat	5	0.0104
GO:0001910	GO:0001910	regulation of leukocyte mediated cytotoxicity	10/480	87/12957	0.00137668	0.0330697	0.0308324	Crtam/Azgp1/H2-Q7/H2-Q9/B2m/H2-Q10/H2-Q6/H2-Q1/H2-Q2/Gm7030	10	0.0208
GO:0002697	GO:0002697	regulation of immune effector process	24/480	336/12957	0.00164596	0.0388283	0.0362015	Apoa2/Bcr/Cr1l/Snx4/Rbp4/Prkcz/Crtam/Apoa1/Cfhr2/Azgp1/Ddx1/Colec10/Cd47/Cfi/H2-Q7/H2-Q9/B2m/H2-Q10/Rap1a/Cfhr4/H2-Q6/H2-Q1/H2-Q2/Gm7030	24	0.05
GO:1904478	GO:1904478	regulation of intestinal absorption	4/480	15/12957	0.00183305	0.0416882	0.0388678	Apoa2/Abcg2/Apoa1/Abcg5	4	0.0083
GO:0090181	GO:0090181	regulation of cholesterol metabolic process	6/480	36/12957	0.00189468	0.0428333	0.0399355	Apob/Ephx2/Scp2/Pex2/Ces1c/Ces1e	6	0.0125
GO:0006956	GO:0006956	complement activation	7/480	49/12957	0.00204396	0.0453975	0.0423262	Cr1l/Apcs/Hc/Cfhr2/Colec10/Cfi/Cfhr4	7	0.0146
