# Supplementary material for: Developmental programming of Kupffer cells by maternal obesity causes fatty liver disease in the offspring
Source: Research Square preprint supplement (doi:10.21203/rs.3.rs-3242837/v1), 2023-08-11
Supplement: Supplementary file 6 [file db6db6f530abc41907435ab2.xlsx]

## Sheet: DEG LFC > 2
	baseMean	log2FoldChange	lfcSE	stat	pvalue	padj	SYMBOL	GENETYPE
ENSMUSG00000026815	11.0245	20.5104	2.13987	9.58488	9.25633e-22	1.14491e-17	Gfi1b	protein_coding
ENSMUSG00000050377	6.42592	19.6441	2.06337	9.52038	1.72543e-21	1.14491e-17	Il31ra	protein_coding
ENSMUSG00000030678	133.328	2.71009	0.526547	5.14691	2.64806e-07	0.000319476	Maz	protein_coding
ENSMUSG00000008843	68.237	8.31349	1.67213	4.97179	6.63361e-07	0.000621093	Cldn13	protein_coding
ENSMUSG00000039671	1159.23	2.08291	0.439872	4.73526	2.18773e-06	0.00135682	Zmynd8	protein_coding
ENSMUSG00000039621	780.227	2.01681	0.426504	4.7287	2.25957e-06	0.00135682	Prex1	protein_coding
ENSMUSG00000026135	90.1562	4.05664	0.877953	4.62056	3.82701e-06	0.00195339	Zfp142	protein_coding
ENSMUSG00000038252	142.632	3.67644	0.839361	4.38005	1.18653e-05	0.00463132	Ncapd2	protein_coding
ENSMUSG00000026835	59.8326	7.49402	1.76392	4.2485	2.15203e-05	0.00643069	Fcnb	protein_coding
ENSMUSG00000038357	1769.97	9.36996	2.22276	4.21546	2.49267e-05	0.00673827	Camp	protein_coding
ENSMUSG00000024163	173.399	2.83978	0.677115	4.19394	2.74156e-05	0.00674895	Mapk8ip3	protein_coding
ENSMUSG00000020709	3353.19	2.12521	0.513715	4.13694	3.51967e-05	0.0075365	Adap2	protein_coding
ENSMUSG00000029866	33.3915	6.58166	1.61116	4.08506	4.40662e-05	0.00790273	Kel	protein_coding
ENSMUSG00000028017	10.5574	6.574	1.60895	4.0859	4.3906e-05	0.00790273	Egf	protein_coding
ENSMUSG00000042489	43.6465	5.7497	1.40343	4.09689	4.18729e-05	0.00790273	Clspn	protein_coding
ENSMUSG00000020020	15.1288	5.68841	1.38399	4.11016	3.95381e-05	0.00790273	Usp44	protein_coding
ENSMUSG00000052837	362.867	2.15353	0.525171	4.10062	4.1204e-05	0.00790273	Junb	protein_coding
ENSMUSG00000009350	341.789	9.599	2.4266	3.95574	7.62966e-05	0.0116383	Mpo	protein_coding
ENSMUSG00000033624	52.3864	4.04564	1.03741	3.89976	9.62873e-05	0.0135939	Pdpr	protein_coding
ENSMUSG00000051373	44.0744	6.56377	1.68739	3.88989	0.000100291	0.0137213	Plpp7	protein_coding
ENSMUSG00000030000	39.9834	7.48499	1.94106	3.85612	0.000115199	0.0151044	Add2	protein_coding
ENSMUSG00000022157	48.4202	7.35205	1.90737	3.85455	0.000115944	0.0151044	Mcpt8	protein_coding
ENSMUSG00000037408	1173.39	2.45971	0.646868	3.80249	0.000143249	0.0169737	Cnnm4	protein_coding
ENSMUSG00000034248	341.622	3.02926	0.798298	3.79464	0.000147856	0.0170794	Slc25a37	protein_coding
ENSMUSG00000020125	155.275	8.64832	2.28166	3.79036	0.000150431	0.0172101	Elane	protein_coding
ENSMUSG00000028825	108.158	8.03405	2.14648	3.7429	0.000181911	0.0193259	Rhd	protein_coding
ENSMUSG00000023216	18.8231	5.38044	1.45725	3.69218	0.000222336	0.020861	Epb42	protein_coding
ENSMUSG00000024213	586.351	2.10576	0.570243	3.69274	0.000221847	0.020861	Nudt3	protein_coding
ENSMUSG00000091694	45.2591	7.35514	2.0154	3.64946	0.000262788	0.0224188	Apol11b	protein_coding
ENSMUSG00000064115	9.82253	5.1547	1.42769	3.61052	0.000305584	0.0244302	Cadm2	protein_coding
ENSMUSG00000023995	40.2471	6.83328	1.91202	3.57385	0.000351772	0.0268297	Tspo2	protein_coding
ENSMUSG00000003808	345.807	2.05542	0.576013	3.56836	0.000359222	0.0269194	Farsa	protein_coding
ENSMUSG00000038725	9.42373	7.2131	2.03593	3.54291	0.000395743	0.028236	Pkhd1l1	protein_coding
ENSMUSG00000039787	18.1617	4.76241	1.37557	3.46215	0.000535885	0.0322915	Cercam	protein_coding
ENSMUSG00000030878	86.7474	3.79759	1.10176	3.44684	0.000567177	0.0336027	Cdr2	protein_coding
ENSMUSG00000096719	16.2243	5.50006	1.61166	3.41267	0.000643296	0.035224	Mrgpra2b	protein_coding
ENSMUSG00000048142	14.1303	6.31959	1.86892	3.38141	0.000721157	0.0370949	Nat8l	protein_coding
ENSMUSG00000032589	6.018	6.19491	1.84912	3.35019	0.000807552	0.038971	Bsn	protein_coding
ENSMUSG00000023868	13.1412	6.50752	1.94737	3.34169	0.000832701	0.0396191	Pde10a	protein_coding
ENSMUSG00000021061	34.3468	3.54777	1.06765	3.32297	0.000890643	0.0405002	Sptb	protein_coding
ENSMUSG00000050106	48.7021	3.18426	0.960685	3.31457	0.000917827	0.0411503	Tmc8	protein_coding
ENSMUSG00000024681	37.9577	6.95424	2.09872	3.31357	0.000921133	0.0411595	Ms4a3	protein_coding
ENSMUSG00000021130	15.9893	6.06678	1.83435	3.30731	0.000941973	0.0413429	Galnt16	protein_coding
ENSMUSG00000040703	15.3996	6.69525	2.03215	3.29467	0.00098539	0.0420013	Cyp2s1	protein_coding
ENSMUSG00000072601	29.3854	6.66349	2.0303	3.28203	0.00103064	0.0431958	Ear1	protein_coding
ENSMUSG00000028332	98.0911	5.51334	1.6913	3.25983	0.00111477	0.0455204	Hemgn	protein_coding
ENSMUSG00000024660	204.787	2.00767	0.615757	3.26049	0.00111221	0.0455204	Incenp	protein_coding
ENSMUSG00000109336	104.443	2.06425	0.63621	3.24461	0.00117613	0.04654	Samd4b	protein_coding
ENSMUSG00000023926	23.6875	6.39968	1.97514	3.24011	0.00119484	0.0469132	Rhag	protein_coding
ENSMUSG00000040026	133.042	4.2677	1.32025	3.23249	0.00122715	0.0476185	Saa3	protein_coding
ENSMUSG00000074472	14.8294	4.42932	1.37392	3.22386	0.00126474	0.0485097	Zfp872	protein_coding
ENSMUSG00000002489	15.5144	5.96851	1.85575	3.21623	0.00129888	0.0493405	Tiam1	protein_coding
ENSMUSG00000061143	74.2486	2.68627	0.835427	3.21545	0.0013024	0.0493405	Maml3	protein_coding
ENSMUSG00000073557	64.6415	3.03987	0.947742	3.20748	0.00133902	0.0500569	Ppp1r12b	protein_coding
ENSMUSG00000042035	38.4188	6.11508	1.92387	3.17853	0.00148024	0.0523967	Igsf3	protein_coding
ENSMUSG00000066877	37.6373	3.13368	0.992502	3.15735	0.0015921	0.0557488	Nck2	protein_coding
ENSMUSG00000061544	29.8771	5.71864	1.81631	3.14849	0.00164116	0.0565711	Zfp229	protein_coding
ENSMUSG00000026688	263.637	2.35304	0.753529	3.12269	0.00179205	0.0592321	Mgst3	protein_coding
ENSMUSG00000052234	11.0975	6.04437	1.93673	3.12092	0.00180286	0.059369	Epx	protein_coding
ENSMUSG00000032077	81.5401	2.4363	0.789403	3.08626	0.00202691	0.062702	Bud13	protein_coding
ENSMUSG00000028975	95.5952	2.28525	0.74649	3.06133	0.00220356	0.0652756	Pex14	protein_coding
ENSMUSG00000000823	347.25	2.62275	0.857938	3.05704	0.00223532	0.065922	Zfp512b	protein_coding
ENSMUSG00000064065	40.8583	3.74797	1.24222	3.01717	0.00255151	0.0709875	Ipcef1	protein_coding
ENSMUSG00000096463	32.6365	4.26762	1.42175	3.00166	0.00268513	0.0727232	Gm21750	protein_coding
ENSMUSG00000033386	808.657	2.37415	0.794232	2.98924	0.00279674	0.0735837	Frrs1	protein_coding
ENSMUSG00000045540	10.1683	4.04418	1.35729	2.97961	0.00288616	0.0747615	Olfr600	protein_coding
ENSMUSG00000041642	258.866	2.05849	0.690578	2.98082	0.0028748	0.0747615	Kif21b	protein_coding
ENSMUSG00000031162	30.9365	6.31644	2.12614	2.97085	0.00296976	0.0757917	Gata1	protein_coding
ENSMUSG00000055866	17.2497	5.60548	1.90983	2.93506	0.00333482	0.0804663	Per2	protein_coding
ENSMUSG00000115170	82.8341	3.09857	1.05984	2.92361	0.00345999	0.0821019	Vmn1r38	protein_coding
ENSMUSG00000039623	164.202	2.0821	0.713669	2.91746	0.00352896	0.0821629	Ap5z1	protein_coding
ENSMUSG00000052435	13.1961	4.70911	1.62269	2.90204	0.00370744	0.0840259	Cebpe	protein_coding
ENSMUSG00000074824	17.2735	3.47821	1.1988	2.9014	0.00371503	0.0840259	Rslcan18	protein_coding
ENSMUSG00000051118	13.2025	2.76428	0.952959	2.90073	0.00372295	0.0840259	Olfr77	protein_coding
ENSMUSG00000059022	93.6134	2.55637	0.881527	2.89994	0.00373239	0.0840959	Kcp	protein_coding
ENSMUSG00000022582	49.8957	5.67035	1.95809	2.89586	0.00378122	0.0847645	Ly6g	protein_coding
ENSMUSG00000046658	26.4577	3.06135	1.06267	2.88082	0.00396648	0.0876841	Zfp316	protein_coding
ENSMUSG00000018924	267.533	7.16354	2.49964	2.86583	0.00415924	0.0901507	Alox15	protein_coding
ENSMUSG00000005958	13.408	5.74848	2.0084	2.86222	0.00420685	0.090228	Ephb3	protein_coding
ENSMUSG00000035109	5.91535	4.32208	1.51702	2.84905	0.00438496	0.0918802	Shc4	protein_coding
ENSMUSG00000097789	11.1948	4.16189	1.46438	2.84207	0.00448213	0.0930045	Gm2115	protein_coding
ENSMUSG00000047284	119.939	2.84056	1.00932	2.81432	0.00488806	0.0983276	Neurl4	protein_coding
ENSMUSG00000041064	12.4418	6.58831	2.34457	2.81003	0.00495362	0.0990914	Pif1	protein_coding
ENSMUSG00000056782	51.3381	2.50153	0.890634	2.80871	0.00497401	0.0992633	Olfr667	protein_coding

## Sheet: DEG LFC < -2
	baseMean	log2FoldChange	lfcSE	stat	pvalue	padj	SYMBOL	GENETYPE
ENSMUSG00000107928	109.732	-23.2869	3.2659	-7.13032	1.00138e-12	4.42977e-09	Gm45140	protein_coding
ENSMUSG00000043541	9.19432	-18.9094	2.84653	-6.64298	3.07397e-11	1.01986e-07	Casc1	protein_coding
ENSMUSG00000025405	197.063	-5.75848	1.03405	-5.56888	2.56376e-08	6.80472e-05	Inhbc	protein_coding
ENSMUSG00000020000	161.507	-22.1393	4.06357	-5.44823	5.08747e-08	0.000112526	Moxd1	protein_coding
ENSMUSG00000028573	162.477	-2.84072	0.531748	-5.34223	9.18083e-08	0.000174055	Fggy	protein_coding
ENSMUSG00000066071	681.776	-5.83586	1.11938	-5.21348	1.85335e-07	0.000307447	Cyp4a12a	protein_coding
ENSMUSG00000047230	68.9958	-10.179	1.97767	-5.14696	2.64744e-07	0.000319476	Cldn2	protein_coding
ENSMUSG00000035202	40803.6	-6.57533	1.29243	-5.08756	3.627e-07	0.000401116	Lars2	protein_coding
ENSMUSG00000024070	227.386	-2.42929	0.48016	-5.05932	4.20748e-07	0.000429519	Prkd3	protein_coding
ENSMUSG00000022351	135.65	-3.39462	0.684288	-4.96081	7.02011e-07	0.000621093	Sqle	protein_coding
ENSMUSG00000036151	59.2585	-9.6723	2.02447	-4.7777	1.7731e-06	0.00130727	Tm6sf2	protein_coding
ENSMUSG00000070576	178.666	-6.52459	1.35988	-4.79791	1.60326e-06	0.00130727	Mn1	protein_coding
ENSMUSG00000052914	87.2656	-5.04787	1.0551	-4.78425	1.71626e-06	0.00130727	Cyp2j6	protein_coding
ENSMUSG00000061838	516.022	-2.14422	0.449877	-4.76623	1.87708e-06	0.00131109	Suclg2	protein_coding
ENSMUSG00000078861	20.2888	-5.40785	1.13753	-4.75403	1.99398e-06	0.00132311	Zfp931	protein_coding
ENSMUSG00000051238	40.4383	-8.34539	1.78639	-4.67166	2.98781e-06	0.00165214	Swsap1	protein_coding
ENSMUSG00000073830	105897	-7.12681	1.54063	-4.62591	3.7295e-06	0.00195339	Mup14	protein_coding
ENSMUSG00000010122	131.001	-6.86474	1.49362	-4.59603	4.30615e-06	0.0020599	Slc47a1	protein_coding
ENSMUSG00000028434	182.099	-5.74357	1.25021	-4.5941	4.34612e-06	0.0020599	Epb41l4b	protein_coding
ENSMUSG00000006373	1066.19	-2.76815	0.610905	-4.53122	5.86434e-06	0.00268365	Pgrmc1	protein_coding
ENSMUSG00000028223	373.687	-2.37916	0.526133	-4.52198	6.12645e-06	0.00271014	Decr1	protein_coding
ENSMUSG00000058523	1980.74	-9.54436	2.15567	-4.42757	9.52997e-06	0.00407975	Mup5	protein_coding
ENSMUSG00000054893	21.7047	-9.45037	2.13964	-4.4168	1.00174e-05	0.00415441	Zfp667	protein_coding
ENSMUSG00000048217	88.5553	-4.92456	1.11823	-4.40388	1.06331e-05	0.0042761	Nags	protein_coding
ENSMUSG00000041333	63.0817	-9.9935	2.3004	-4.34424	1.39756e-05	0.00509571	Mup4	protein_coding
ENSMUSG00000035104	55.0477	-6.13932	1.43561	-4.27646	1.89884e-05	0.00629989	Eva1a	protein_coding
ENSMUSG00000063929	42.3144	-10.1273	2.37202	-4.26948	1.95932e-05	0.00634199	Cyp4a32	protein_coding
ENSMUSG00000052520	354.985	-3.87219	0.908409	-4.26261	2.02051e-05	0.00638433	Cyp2j5	protein_coding
ENSMUSG00000023232	26.0806	-9.52057	2.25863	-4.2152	2.49561e-05	0.00673827	Serinc2	protein_coding
ENSMUSG00000002847	73.9747	-7.09836	1.68235	-4.2193	2.4506e-05	0.00673827	Pla1a	protein_coding
ENSMUSG00000024747	251.085	-3.89974	0.930561	-4.19074	2.78046e-05	0.00674895	Aldh1a7	protein_coding
ENSMUSG00000020150	469.863	-2.23283	0.531113	-4.20405	2.62177e-05	0.00674895	Gamt	protein_coding
ENSMUSG00000022299	92.8326	-2.22809	0.53184	-4.18939	2.79702e-05	0.00674895	Slc25a32	protein_coding
ENSMUSG00000073834	75289	-6.49837	1.55926	-4.16759	3.07835e-05	0.00714143	Mup11	protein_coding
ENSMUSG00000060407	1297.16	-4.46402	1.07194	-4.16444	3.12111e-05	0.00714143	Cyp2a12	protein_coding
ENSMUSG00000038591	55.7438	-4.10726	0.985467	-4.16783	3.07514e-05	0.00714143	Colec10	protein_coding
ENSMUSG00000048782	42.5653	-10.0493	2.41669	-4.1583	3.20624e-05	0.00721187	Insc	protein_coding
ENSMUSG00000049709	18.3536	-5.74255	1.38818	-4.13675	3.52254e-05	0.0075365	Nlrp10	protein_coding
ENSMUSG00000022109	202.906	-2.23078	0.545546	-4.08909	4.33074e-05	0.00790273	Med4	protein_coding
ENSMUSG00000065947	170212	-4.83444	1.19156	-4.05723	4.96587e-05	0.00867132	mt-Nd4l	protein_coding
ENSMUSG00000035811	79.7911	-5.72322	1.42254	-4.02323	5.7406e-05	0.00965361	Ugt2b35	protein_coding
ENSMUSG00000000154	421.154	-2.40821	0.59949	-4.01709	5.89211e-05	0.00965361	Slc22a18	protein_coding
ENSMUSG00000021715	69.325	-2.24674	0.559092	-4.01855	5.85564e-05	0.00965361	Cwc27	protein_coding
ENSMUSG00000025240	189.19	-2.05985	0.512284	-4.02091	5.79736e-05	0.00965361	Sacm1l	protein_coding
ENSMUSG00000005681	32769.8	-4.32488	1.08457	-3.98764	6.67338e-05	0.0108003	Apoa2	protein_coding
ENSMUSG00000066154	31426.1	-5.37261	1.35274	-3.97165	7.1376e-05	0.0112766	Mup3	protein_coding
ENSMUSG00000043789	42.701	-9.4092	2.37341	-3.96442	7.35755e-05	0.0114873	Vwce	protein_coding
ENSMUSG00000078673	112460	-5.85119	1.47862	-3.9572	7.58329e-05	0.0116383	Mup19	protein_coding
ENSMUSG00000079015	91366.5	-5.15684	1.30673	-3.94636	7.93486e-05	0.0118319	Serpina1c	protein_coding
ENSMUSG00000041957	48.5933	-7.36539	1.8689	-3.94102	8.11355e-05	0.0118324	Pkp2	protein_coding
ENSMUSG00000115423	57.4046	-3.91425	0.99387	-3.93839	8.20306e-05	0.0118329	AL731706.1	protein_coding
ENSMUSG00000028158	597	-4.60806	1.17135	-3.93398	8.35495e-05	0.0119224	Mttp	protein_coding
ENSMUSG00000026304	36.2169	-4.91459	1.26173	-3.89512	9.81497e-05	0.013711	Rab17	protein_coding
ENSMUSG00000061740	723.428	-4.97414	1.27832	-3.89116	9.9765e-05	0.0137213	Cyp2d22	protein_coding
ENSMUSG00000071178	74262.2	-4.9416	1.28088	-3.85796	0.000114336	0.0151044	Serpina1b	protein_coding
ENSMUSG00000053279	1225.97	-3.24152	0.840996	-3.85439	0.00011602	0.0151044	Aldh1a1	protein_coding
ENSMUSG00000032349	1172.93	-2.56528	0.665575	-3.85424	0.000116092	0.0151044	Elovl5	protein_coding
ENSMUSG00000073842	151720	-6.05477	1.57743	-3.83838	0.000123847	0.0158326	Mup7	protein_coding
ENSMUSG00000021539	116.362	-2.94519	0.76739	-3.83793	0.000124074	0.0158326	Lect2	protein_coding
ENSMUSG00000016758	11.5078	-7.31504	1.91595	-3.81797	0.000134552	0.0166883	Bik	protein_coding
ENSMUSG00000026259	27.461	-8.10479	2.12596	-3.8123	0.000137677	0.0168983	Ngef	protein_coding
ENSMUSG00000066153	1355.83	-6.3734	1.67337	-3.80871	0.000139693	0.0168983	Mup21	protein_coding
ENSMUSG00000078686	4987.85	-6.31077	1.66318	-3.7944	0.000148001	0.0170794	Mup9	protein_coding
ENSMUSG00000066366	52684.5	-5.00003	1.31702	-3.79647	0.00014677	0.0170794	Serpina1a	protein_coding
ENSMUSG00000002588	2162.77	-3.75165	0.994035	-3.77417	0.000160543	0.017904	Pon1	protein_coding
ENSMUSG00000022098	211.126	-3.93023	1.04719	-3.75311	0.000174651	0.0193149	Bmp1	protein_coding
ENSMUSG00000055312	30.1854	-9.20612	2.45961	-3.74292	0.000181894	0.0193259	Them7	protein_coding
ENSMUSG00000034110	36.7203	-5.95597	1.58903	-3.74819	0.000178117	0.0193259	Kctd7	protein_coding
ENSMUSG00000078672	55673.4	-5.41965	1.44805	-3.74273	0.000182031	0.0193259	Mup20	protein_coding
ENSMUSG00000079507	409.23	-5.71957	1.52938	-3.7398	0.000184166	0.0193974	H2-Q1	protein_coding
ENSMUSG00000035540	23557.2	-4.16809	1.11629	-3.73389	0.000188544	0.0195655	Gc	protein_coding
ENSMUSG00000090150	470.922	-2.53975	0.68028	-3.73339	0.00018892	0.0195655	Acad11	protein_coding
ENSMUSG00000046312	96.1053	-4.27406	1.15089	-3.7137	0.000204248	0.0205346	AI464131	protein_coding
ENSMUSG00000036985	90.7829	-4.18421	1.12873	-3.70702	0.000209716	0.0205911	Zdhhc9	protein_coding
ENSMUSG00000079418	95.8093	-2.29702	0.619395	-3.70849	0.000208496	0.0205911	Atg4a	protein_coding
ENSMUSG00000078675	12193.3	-5.45434	1.4741	-3.70011	0.000215509	0.0207248	Mup16	protein_coding
ENSMUSG00000058258	154.992	-2.53674	0.687244	-3.69118	0.000223213	0.020861	Idi1	protein_coding
ENSMUSG00000028037	175.257	-2.31127	0.62604	-3.69189	0.000222591	0.020861	Ifi44	protein_coding
ENSMUSG00000061959	428.313	-4.53964	1.23266	-3.6828	0.00023069	0.0211137	Ces1e	protein_coding
ENSMUSG00000030378	312.198	-2.94815	0.802131	-3.6754	0.000237476	0.0214437	Sult2a8	protein_coding
ENSMUSG00000031604	310.268	-2.18491	0.594477	-3.67535	0.000237527	0.0214437	Msmo1	protein_coding
ENSMUSG00000025991	1027.24	-3.45524	0.941474	-3.67003	0.000242522	0.021607	Cps1	protein_coding
ENSMUSG00000028184	70.5148	-3.42006	0.932344	-3.66825	0.000244221	0.021607	Adgrl2	protein_coding
ENSMUSG00000049404	138.075	-3.17083	0.864134	-3.66937	0.000243149	0.021607	Rarres1	protein_coding
ENSMUSG00000039620	14.5355	-6.99964	1.90938	-3.66591	0.000246456	0.0216604	6430573F11Rik	protein_coding
ENSMUSG00000032808	24.3834	-9.12593	2.49991	-3.65051	0.000261722	0.0224188	Cyp2c38	protein_coding
ENSMUSG00000031958	243.075	-3.99692	1.09958	-3.63496	0.000278025	0.0234015	Ldhd	protein_coding
ENSMUSG00000035237	915.532	-3.76167	1.03769	-3.62504	0.00028892	0.0241148	Lcat	protein_coding
ENSMUSG00000024750	240.849	-2.07562	0.573717	-3.61784	0.00029707	0.0243359	Zfand5	protein_coding
ENSMUSG00000064363	800785	-4.13281	1.14377	-3.61332	0.000302301	0.0244302	mt-Nd4	protein_coding
ENSMUSG00000031445	1141.84	-3.74332	1.03764	-3.60751	0.000309144	0.0245653	Proz	protein_coding
ENSMUSG00000075273	17.6424	-9.18209	2.54954	-3.60147	0.000316418	0.0247011	Ttc30b	protein_coding
ENSMUSG00000036687	17.1277	-8.67963	2.42761	-3.57538	0.000349718	0.0268272	Tmem184a	protein_coding
ENSMUSG00000031138	196.879	-3.15331	0.882881	-3.57161	0.000354791	0.0269054	F9	protein_coding
ENSMUSG00000039238	8.07232	-8.23923	2.31053	-3.56595	0.000362537	0.0269194	Zfp750	protein_coding
ENSMUSG00000054435	252.088	-2.06611	0.579464	-3.56555	0.000363091	0.0269194	Gimap4	protein_coding
ENSMUSG00000064351	1.94159e+06	-3.91817	1.10064	-3.55991	0.000370985	0.0272008	mt-Co1	protein_coding
ENSMUSG00000032018	758.273	-2.99576	0.845037	-3.54513	0.000392427	0.028236	Sc5d	protein_coding
ENSMUSG00000021928	272.907	-2.0119	0.567767	-3.54354	0.000394798	0.028236	Ebpl	protein_coding
ENSMUSG00000061906	113.21	-10.0396	2.84511	-3.52872	0.000417573	0.0287355	Ugt2b38	protein_coding
ENSMUSG00000049764	20.3174	-7.43933	2.10835	-3.52851	0.000417901	0.0287355	Zfp280b	protein_coding
ENSMUSG00000046798	53.1598	-5.8243	1.65181	-3.52602	0.000421854	0.0288578	Cldn12	protein_coding
ENSMUSG00000020467	10.6784	-8.16043	2.31761	-3.52105	0.000429844	0.0292536	Efemp1	protein_coding
ENSMUSG00000021210	1185.94	-2.74652	0.783212	-3.50674	0.00045364	0.0301013	Akr1c6	protein_coding
ENSMUSG00000036545	19.6592	-4.58907	1.30924	-3.50515	0.000456345	0.0301301	Adamts2	protein_coding
ENSMUSG00000089873	13331.6	-8.99382	2.57821	-3.4884	0.000485923	0.0309105	Mup13	protein_coding
ENSMUSG00000050854	15.9873	-8.71154	2.49215	-3.49559	0.000473022	0.0309105	Tmem125	protein_coding
ENSMUSG00000022591	20.8534	-8.59118	2.46275	-3.48845	0.000485822	0.0309105	Gm9747	protein_coding
ENSMUSG00000110439	78732.2	-4.83151	1.38555	-3.48706	0.000488353	0.0309105	Gm21320	protein_coding
ENSMUSG00000070594	440.739	-3.96217	1.1336	-3.49522	0.000473676	0.0309105	Gm4788	protein_coding
ENSMUSG00000031173	611.978	-3.30385	0.94669	-3.4899	0.000483206	0.0309105	Otc	protein_coding
ENSMUSG00000003721	511.861	-2.00203	0.574763	-3.48322	0.000495417	0.0309105	Insig2	protein_coding
ENSMUSG00000031271	127.554	-4.78951	1.37969	-3.47144	0.00051768	0.0318061	Serpina7	protein_coding
ENSMUSG00000096688	50955.5	-6.77761	1.95389	-3.46877	0.000522839	0.0319355	Mup17	protein_coding
ENSMUSG00000015970	113.964	-4.80455	1.38545	-3.46787	0.000524598	0.0319355	Chdh	protein_coding
ENSMUSG00000029368	205033	-4.24278	1.23088	-3.44693	0.000566992	0.0336027	Alb	protein_coding
ENSMUSG00000027761	2268.28	-3.60757	1.0481	-3.44202	0.000577396	0.0339054	Aadac	protein_coding
ENSMUSG00000064358	1.98982e+06	-4.20179	1.22127	-3.44052	0.000580605	0.0339436	mt-Co3	protein_coding
ENSMUSG00000092243	33.3954	-5.78656	1.68345	-3.43732	0.00058751	0.0341967	Gm7030	protein_coding
ENSMUSG00000067279	55.2347	-4.30726	1.25431	-3.43396	0.000594823	0.0344457	Ppp1r3c	protein_coding
ENSMUSG00000109764	745.455	-3.88039	1.13033	-3.43298	0.000596979	0.0344457	Klkb1	protein_coding
ENSMUSG00000025479	15278.5	-4.17815	1.21853	-3.42884	0.000606169	0.0346745	Cyp2e1	protein_coding
ENSMUSG00000031147	27.3379	-7.12954	2.08062	-3.42665	0.000611086	0.0348057	Magix	protein_coding
ENSMUSG00000040505	29.8459	-5.67925	1.66449	-3.41202	0.000644843	0.035224	Abcg5	protein_coding
ENSMUSG00000055912	168.387	-4.27296	1.2515	-3.41427	0.000639522	0.035224	Tmem150a	protein_coding
ENSMUSG00000064367	239532	-4.04569	1.18328	-3.41903	0.000628447	0.035224	mt-Nd5	protein_coding
ENSMUSG00000005547	291.593	-3.99048	1.17024	-3.40997	0.000649701	0.035224	Cyp2a5	protein_coding
ENSMUSG00000020609	1229.55	-3.91944	1.14948	-3.40976	0.000650205	0.035224	Apob	protein_coding
ENSMUSG00000028553	1334.08	-3.02954	0.885545	-3.4211	0.000623685	0.035224	Angptl3	protein_coding
ENSMUSG00000041992	128.665	-2.56972	0.752222	-3.41617	0.000635083	0.035224	Rapgef5	protein_coding
ENSMUSG00000048489	407.122	-2.34324	0.685651	-3.41755	0.000631885	0.035224	8430408G22Rik	protein_coding
ENSMUSG00000049717	30.2182	-4.81013	1.41159	-3.4076	0.000655373	0.0353555	Lig4	protein_coding
ENSMUSG00000054630	2912.52	-3.60123	1.05771	-3.40475	0.000662236	0.0355811	Ugt2b5	protein_coding
ENSMUSG00000010651	4775.25	-3.0788	0.906665	-3.39575	0.000684416	0.0361868	Acaa1b	protein_coding
ENSMUSG00000068086	7860.42	-5.46166	1.61421	-3.38348	0.000715743	0.0369912	Cyp2d9	protein_coding
ENSMUSG00000026542	261.329	-3.95897	1.17017	-3.38324	0.000716355	0.0369912	Apcs	protein_coding
ENSMUSG00000039246	51.9713	-2.48769	0.734903	-3.38506	0.000711625	0.0369912	Lyplal1	protein_coding
ENSMUSG00000074768	5908.35	-2.80286	0.83004	-3.37678	0.000733394	0.0374341	Bhmt	protein_coding
ENSMUSG00000060579	15.1923	-8.49683	2.51967	-3.3722	0.000745705	0.0376928	Fhit	protein_coding
ENSMUSG00000062181	2134.17	-5.01976	1.48951	-3.37009	0.000751444	0.0376928	Ces3b	protein_coding
ENSMUSG00000021573	40.7723	-4.04139	1.19961	-3.36891	0.000754649	0.0376928	Tppp	protein_coding
ENSMUSG00000006567	44.6616	-6.23635	1.85822	-3.35608	0.000790543	0.0385709	Atp7b	protein_coding
ENSMUSG00000063683	352.435	-3.42992	1.02367	-3.35063	0.000806292	0.038971	Glyat	protein_coding
ENSMUSG00000069922	9948.62	-4.19928	1.25547	-3.34479	0.00082346	0.039564	Ces3a	protein_coding
ENSMUSG00000031596	308.37	-2.04383	0.611194	-3.344	0.000825803	0.039564	Slc7a2	protein_coding
ENSMUSG00000024987	30.7556	-8.77063	2.62699	-3.33867	0.000841816	0.0396191	Cyp26a1	protein_coding
ENSMUSG00000021884	492.89	-2.40533	0.719888	-3.34125	0.000834024	0.0396191	Hacl1	protein_coding
ENSMUSG00000094793	4490.2	-6.64651	1.99368	-3.33379	0.000856699	0.0397505	Mup12	protein_coding
ENSMUSG00000078862	26.5747	-4.84247	1.45165	-3.33584	0.000850415	0.0397505	Gm14326	protein_coding
ENSMUSG00000042251	254.253	-3.92359	1.17725	-3.33284	0.000859649	0.0397505	Pm20d1	protein_coding
ENSMUSG00000004768	23.8508	-3.33082	0.999083	-3.33387	0.000856454	0.0397505	Rab23	protein_coding
ENSMUSG00000026189	527.37	-2.21551	0.664642	-3.33338	0.000857963	0.0397505	Pecr	protein_coding
ENSMUSG00000068085	137.067	-10.9069	3.27454	-3.33082	0.000865909	0.039901	Cyp2d11	protein_coding
ENSMUSG00000061540	13.074	-8.93942	2.68649	-3.32754	0.000876162	0.0402337	Orm2	protein_coding
ENSMUSG00000023070	484.702	-2.76886	0.834372	-3.31849	0.000905046	0.0408533	Rgn	protein_coding
ENSMUSG00000067144	219.859	-6.03304	1.82509	-3.30562	0.000947665	0.0413429	Slc22a7	protein_coding
ENSMUSG00000042429	33.969	-5.95214	1.79876	-3.30902	0.000936225	0.0413429	Adora1	protein_coding
ENSMUSG00000043140	122.4	-3.04993	0.923368	-3.30305	0.000956392	0.0413429	Tmem186	protein_coding
ENSMUSG00000040134	2004.85	-2.88643	0.873478	-3.30453	0.000951362	0.0413429	Rdh7	protein_coding
ENSMUSG00000054226	301.937	-2.02241	0.612161	-3.30373	0.000954087	0.0413429	Tprkb	protein_coding
ENSMUSG00000058952	917.294	-3.71987	1.12759	-3.29897	0.000970411	0.0416774	Cfi	protein_coding
ENSMUSG00000071177	64749.9	-4.45705	1.35167	-3.29745	0.000975679	0.0417685	Serpina1d	protein_coding
ENSMUSG00000038705	67.2855	-2.67305	0.812952	-3.28808	0.00100872	0.0426328	Gmeb2	protein_coding
ENSMUSG00000022235	155.949	-2.16433	0.658949	-3.28452	0.00102157	0.0430388	Cmbl	protein_coding
ENSMUSG00000072849	85127.7	-4.79198	1.46021	-3.28171	0.0010318	0.0431958	Serpina1e	protein_coding
ENSMUSG00000020777	3370.99	-2.5328	0.774116	-3.27186	0.00106841	0.0444478	Acox1	protein_coding
ENSMUSG00000028001	8588.09	-3.99044	1.22067	-3.26906	0.00107905	0.04475	Fga	protein_coding
ENSMUSG00000020782	62.8287	-3.08819	0.946417	-3.26303	0.00110227	0.0455204	Llgl2	protein_coding
ENSMUSG00000078687	7386.62	-8.58873	2.63548	-3.25888	0.00111853	0.0455337	Mup8	protein_coding
ENSMUSG00000040471	17.3967	-8.78802	2.70079	-3.25387	0.00113844	0.0461055	Ggt6	protein_coding
ENSMUSG00000032021	9.91666	-8.98086	2.76732	-3.24533	0.00117315	0.04654	Crtam	protein_coding
ENSMUSG00000096887	15.9062	-4.86706	1.49912	-3.24661	0.00116788	0.04654	Gm20594	protein_coding
ENSMUSG00000058207	92747	-4.12026	1.26847	-3.2482	0.00116139	0.04654	Serpina3k	protein_coding
ENSMUSG00000033831	19497.9	-3.56486	1.09888	-3.24408	0.00117832	0.04654	Fgb	protein_coding
ENSMUSG00000021993	73.8468	-2.70921	0.834969	-3.24469	0.00117581	0.04654	Mipep	protein_coding
ENSMUSG00000030613	79.5808	-2.00946	0.61856	-3.2486	0.00115974	0.04654	Ccdc90b	protein_coding
ENSMUSG00000039209	9.37989	-7.13678	2.20708	-3.23359	0.00122245	0.0475751	Rpl39l	protein_coding
ENSMUSG00000029053	67.3274	-4.06037	1.25947	-3.22387	0.0012647	0.0485097	Prkcz	protein_coding
ENSMUSG00000033860	10621.5	-3.42291	1.06136	-3.22502	0.00125962	0.0485097	Fgg	protein_coding
ENSMUSG00000042248	174.956	-5.50498	1.70989	-3.2195	0.00128413	0.0489705	Cyp2c37	protein_coding
ENSMUSG00000064370	1.80599e+06	-3.44042	1.06836	-3.22028	0.00128063	0.0489705	mt-Cytb	protein_coding
ENSMUSG00000040413	296.668	-4.97336	1.54773	-3.21333	0.00131207	0.0493405	Timd2	protein_coding
ENSMUSG00000078683	9828.1	-5.76294	1.79611	-3.20856	0.00133402	0.0500106	Mup1	protein_coding
ENSMUSG00000029499	176.824	-2.35401	0.735316	-3.20135	0.00136785	0.0505647	Pxmp2	protein_coding
ENSMUSG00000035566	28.6126	-3.08576	0.966465	-3.19283	0.00140888	0.0516498	Pcdh17	protein_coding
ENSMUSG00000030513	79.5623	-4.83555	1.51812	-3.18521	0.00144647	0.0517919	Pcsk6	protein_coding
ENSMUSG00000032310	1295.65	-4.64156	1.45771	-3.18415	0.00145178	0.0517919	Cyp1a2	protein_coding
ENSMUSG00000063558	85.0346	-4.1493	1.30197	-3.18693	0.00143791	0.0517919	Aox1	protein_coding
ENSMUSG00000047492	86.7925	-3.41008	1.0701	-3.18668	0.00143917	0.0517919	Inhbe	protein_coding
ENSMUSG00000003617	3860.94	-3.56582	1.12363	-3.17349	0.00150618	0.05302	Cp	protein_coding
ENSMUSG00000023886	26.6011	-8.89182	2.80908	-3.16538	0.00154878	0.0543753	Smoc2	protein_coding
ENSMUSG00000040213	298.009	-2.00608	0.63575	-3.15545	0.00160251	0.0559657	Kyat3	protein_coding
ENSMUSG00000028356	9064.25	-3.53296	1.12017	-3.15396	0.00161073	0.0561051	Ambp	protein_coding
ENSMUSG00000064341	686588	-3.58056	1.13662	-3.15018	0.00163171	0.0563918	mt-Nd1	protein_coding
ENSMUSG00000030834	213.68	-5.0532	1.60551	-3.14742	0.0016472	0.0566322	Abcc6	protein_coding
ENSMUSG00000026678	168.154	-2.62518	0.83447	-3.14593	0.00165562	0.0567745	Rgs5	protein_coding
ENSMUSG00000030088	2388.52	-2.41036	0.767546	-3.14035	0.00168749	0.0574221	Aldh1l1	protein_coding
ENSMUSG00000046826	16.3769	-7.95101	2.53366	-3.13816	0.00170014	0.0575575	Fam187b	protein_coding
ENSMUSG00000022040	1231.56	-2.75413	0.878585	-3.13474	0.00172008	0.0579715	Ephx2	protein_coding
ENSMUSG00000073988	173.589	-2.57777	0.823064	-3.13192	0.00173669	0.0583483	Ttpa	protein_coding
ENSMUSG00000030762	550.079	-4.43648	1.41712	-3.13063	0.0017443	0.058456	Aqp8	protein_coding
ENSMUSG00000032083	56329.8	-3.66406	1.17144	-3.12782	0.0017611	0.0586816	Apoa1	protein_coding
ENSMUSG00000020175	11.3575	-7.8524	2.51348	-3.12411	0.00178343	0.0591697	Rab36	protein_coding
ENSMUSG00000020910	76.2518	-2.22538	0.714136	-3.11619	0.00183203	0.0600318	Adprm	protein_coding
ENSMUSG00000072664	170.63	-3.75704	1.20638	-3.1143	0.00184381	0.0602688	Ugt3a1	protein_coding
ENSMUSG00000010064	2059.1	-4.75566	1.52917	-3.10996	0.00187116	0.0608357	Slc38a3	protein_coding
ENSMUSG00000022868	24998.6	-3.46227	1.11625	-3.10168	0.00192423	0.0613858	Ahsg	protein_coding
ENSMUSG00000061808	15478.9	-3.22865	1.04052	-3.10292	0.00191624	0.0613858	Ttr	protein_coding
ENSMUSG00000033107	289.941	-2.91594	0.940074	-3.10182	0.00192338	0.0613858	Rnf125	protein_coding
ENSMUSG00000009681	70.3066	-3.71516	1.19887	-3.09889	0.00194245	0.0617086	Bcr	protein_coding
ENSMUSG00000054237	36.9288	-2.37243	0.766549	-3.09495	0.00196844	0.0620503	Fra10ac1	protein_coding
ENSMUSG00000096674	38519.1	-6.52487	2.11227	-3.08904	0.00200805	0.062702	Mup15	protein_coding
ENSMUSG00000054827	780.983	-4.11114	1.33181	-3.08689	0.00202265	0.062702	Cyp2c50	protein_coding
ENSMUSG00000028655	134.632	-4.08953	1.32491	-3.08666	0.00202419	0.062702	Mfsd2a	protein_coding
ENSMUSG00000078688	16486.1	-5.47789	1.77604	-3.08433	0.0020401	0.0628199	Mup2	protein_coding
ENSMUSG00000028527	37.3882	-3.73107	1.20969	-3.08432	0.00204019	0.0628199	Ak4	protein_coding
ENSMUSG00000051041	24.0998	-7.64463	2.4826	-3.07929	0.00207494	0.063517	Olfml1	protein_coding
ENSMUSG00000091705	106.959	-3.48162	1.13078	-3.07897	0.00207719	0.063517	H2-Q2	protein_coding
ENSMUSG00000022094	97.4997	-3.5629	1.15823	-3.07615	0.00209692	0.0637549	Slc39a14	protein_coding
ENSMUSG00000040181	175.673	-2.25055	0.731523	-3.07653	0.00209424	0.0637549	Fmo1	protein_coding
ENSMUSG00000053137	32.2103	-5.41981	1.76505	-3.07062	0.00213614	0.0640025	Mapk11	protein_coding
ENSMUSG00000023829	978.883	-3.88151	1.26321	-3.07274	0.00212105	0.0640025	Slc22a1	protein_coding
ENSMUSG00000037053	3446.63	-3.31139	1.07756	-3.07303	0.00211894	0.0640025	Azgp1	protein_coding
ENSMUSG00000027261	312.293	-2.43701	0.793599	-3.07083	0.00213468	0.0640025	Hao1	protein_coding
ENSMUSG00000026874	905.866	-3.91107	1.27412	-3.06962	0.00214331	0.0640629	Hc	protein_coding
ENSMUSG00000024694	324.263	-3.14837	1.02815	-3.06217	0.00219735	0.0652373	Keg1	protein_coding
ENSMUSG00000022877	1337.5	-3.07106	1.00542	-3.05452	0.0022542	0.0661998	Hrg	protein_coding
ENSMUSG00000057400	6061.54	-3.3936	1.1131	-3.04877	0.00229781	0.0668735	Ces1c	protein_coding
ENSMUSG00000074207	6876.71	-2.54368	0.834329	-3.04877	0.00229782	0.0668735	Adh1	protein_coding
ENSMUSG00000036256	365.737	-2.42764	0.797128	-3.04549	0.00232304	0.0669827	Igfbp7	protein_coding
ENSMUSG00000067235	21794	-4.01311	1.3205	-3.03908	0.00237302	0.0680496	H2-Q10	protein_coding
ENSMUSG00000033688	1526.7	-3.12767	1.02966	-3.03758	0.00238484	0.0680627	1300017J02Rik	protein_coding
ENSMUSG00000027048	470.35	-4.44212	1.463	-3.03632	0.00239488	0.0682026	Abcb11	protein_coding
ENSMUSG00000046959	413.33	-3.73269	1.22989	-3.03499	0.00240543	0.068306	Slc26a1	protein_coding
ENSMUSG00000017344	11234.5	-3.66849	1.2089	-3.03457	0.0024088	0.068306	Vtn	protein_coding
ENSMUSG00000001435	1267.44	-4.01962	1.32525	-3.03311	0.00242048	0.068345	Col18a1	protein_coding
ENSMUSG00000054422	14492.1	-2.37046	0.781502	-3.03321	0.0024197	0.068345	Fabp1	protein_coding
ENSMUSG00000029028	142.589	-3.98926	1.31596	-3.03145	0.00243381	0.0684343	Lrrc47	protein_coding
ENSMUSG00000030029	61.7831	-6.57224	2.17612	-3.02017	0.00252632	0.0704344	Lrig1	protein_coding
ENSMUSG00000021900	228.427	-2.25743	0.747296	-3.0208	0.00252107	0.0704344	Btd	protein_coding
ENSMUSG00000053646	66.7866	-4.07043	1.34991	-3.01533	0.00256699	0.0711202	Plxnb1	protein_coding
ENSMUSG00000052974	2684.64	-3.18042	1.05588	-3.0121	0.00259446	0.0717315	Cyp2f2	protein_coding
ENSMUSG00000032252	76.1127	-3.00171	0.997104	-3.01042	0.00260884	0.0719789	Glce	protein_coding
ENSMUSG00000024479	37.7076	-3.55691	1.18307	-3.00651	0.00264261	0.072013	Mal2	protein_coding
ENSMUSG00000029630	261.146	-3.35547	1.11587	-3.00704	0.00263804	0.072013	Cyp3a25	protein_coding
ENSMUSG00000026858	130.49	-3.07819	1.02343	-3.00772	0.00263212	0.072013	Miga2	protein_coding
ENSMUSG00000074115	112.823	-4.05845	1.35143	-3.00308	0.00267259	0.0726802	Saa1	protein_coding
ENSMUSG00000031196	102.939	-3.22802	1.07513	-3.00245	0.00267816	0.0726828	F8	protein_coding
ENSMUSG00000079012	2036.78	-4.29118	1.43124	-2.99823	0.00271552	0.0732474	Serpina3m	protein_coding
ENSMUSG00000037003	141.411	-2.85166	0.951605	-2.99669	0.00272932	0.0734701	Tns2	protein_coding
ENSMUSG00000078680	356.243	-4.79659	1.60164	-2.9948	0.00274628	0.0734902	Mup10	protein_coding
ENSMUSG00000033965	316.87	-3.19497	1.0677	-2.99239	0.00276799	0.0734902	Slc16a2	protein_coding
ENSMUSG00000034371	267.379	-2.6284	0.878511	-2.99188	0.00277261	0.0734902	Tkfc	protein_coding
ENSMUSG00000024990	5628.86	-2.72048	0.90977	-2.9903	0.00278708	0.0735335	Rbp4	protein_coding
ENSMUSG00000000049	7362.11	-3.68872	1.23415	-2.98887	0.00280007	0.0735837	Apoh	protein_coding
ENSMUSG00000008153	15.3231	-6.48603	2.17099	-2.98759	0.00281191	0.0737487	Clstn3	protein_coding
ENSMUSG00000031026	13.5566	-9.37161	3.14009	-2.98451	0.00284035	0.0741783	Trim66	protein_coding
ENSMUSG00000002803	80.0156	-2.51212	0.844123	-2.97601	0.00292024	0.0751057	Btbd6	protein_coding
ENSMUSG00000039196	1010.95	-3.22594	1.08489	-2.97351	0.0029441	0.0752816	Orm1	protein_coding
ENSMUSG00000033898	609.783	-3.4512	1.16382	-2.9654	0.00302293	0.0769817	Cfhr2	protein_coding
ENSMUSG00000037857	58.4986	-2.71546	0.915875	-2.96488	0.00302799	0.0769817	Nufip2	protein_coding
ENSMUSG00000006711	16.6888	-7.21532	2.43709	-2.96063	0.00307008	0.0772859	D130043K22Rik	protein_coding
ENSMUSG00000067225	224.429	-5.00999	1.69262	-2.9599	0.00307739	0.0772859	Cyp2c54	protein_coding
ENSMUSG00000029260	377.926	-3.35764	1.1345	-2.95957	0.00308072	0.0772859	Ugt2b34	protein_coding
ENSMUSG00000070704	1383.27	-3.25882	1.10392	-2.95205	0.00315675	0.0785593	Ugt2b36	protein_coding
ENSMUSG00000023057	291.371	-3.12417	1.05834	-2.95196	0.00315759	0.0785593	Fabp2	protein_coding
ENSMUSG00000026585	67.3471	-2.2764	0.771237	-2.95162	0.00316108	0.0785593	Kifap3	protein_coding
ENSMUSG00000046811	210.946	-3.58269	1.21474	-2.94935	0.00318439	0.0788434	Gltpd2	protein_coding
ENSMUSG00000060613	553.851	-4.15146	1.40848	-2.94748	0.00320374	0.0791748	Cyp2c70	protein_coding
ENSMUSG00000040899	12.9649	-8.7363	2.9666	-2.94489	0.00323074	0.0794412	Ccr6	protein_coding
ENSMUSG00000078674	7787.48	-4.79303	1.62831	-2.94357	0.0032445	0.0794412	Mup18	protein_coding
ENSMUSG00000059908	7122.26	-3.64039	1.23644	-2.94426	0.00323728	0.0794412	Mug1	protein_coding
ENSMUSG00000034171	351.216	-3.47813	1.18099	-2.9451	0.00322847	0.0794412	Faah	protein_coding
ENSMUSG00000060550	3238.8	-2.57576	0.875214	-2.943	0.00325044	0.0794412	H2-Q7	protein_coding
ENSMUSG00000044854	8.23479	-5.35372	1.81968	-2.94212	0.00325974	0.0795222	1700056E22Rik	protein_coding
ENSMUSG00000025089	148.506	-3.86373	1.3138	-2.94087	0.00327291	0.0795509	Gfra1	protein_coding
ENSMUSG00000032051	121.102	-2.02636	0.688957	-2.9412	0.00326943	0.0795509	Fdx1	protein_coding
ENSMUSG00000061292	15.5038	-8.73508	2.97501	-2.93615	0.00332317	0.0803312	Cyp3a59	protein_coding
ENSMUSG00000037071	6325.7	-2.7488	0.938931	-2.92758	0.0034161	0.081817	Scd1	protein_coding
ENSMUSG00000030054	7.90095	-7.65607	2.61957	-2.92265	0.00347066	0.0821019	Gp9	protein_coding
ENSMUSG00000042680	48.0039	-5.25659	1.79793	-2.92369	0.00345908	0.0821019	Garem1	protein_coding
ENSMUSG00000042010	79.2974	-5.03719	1.72554	-2.91921	0.00350924	0.0821361	Acacb	protein_coding
ENSMUSG00000071633	273.273	-3.67478	1.25823	-2.92059	0.00349368	0.0821361	Gm4952	protein_coding
ENSMUSG00000054484	65.3242	-3.28217	1.12417	-2.91964	0.00350438	0.0821361	Tmem62	protein_coding
ENSMUSG00000030359	8803.53	-3.27269	1.12041	-2.92098	0.00348932	0.0821361	Pzp	protein_coding
ENSMUSG00000061353	211.277	-2.80709	0.96132	-2.92003	0.00349995	0.0821361	Cxcl12	protein_coding
ENSMUSG00000027249	10024.4	-3.13125	1.07309	-2.91798	0.00352305	0.0821629	F2	protein_coding
ENSMUSG00000079037	86.0686	-2.50476	0.858239	-2.91849	0.00351734	0.0821629	Prnp	protein_coding
ENSMUSG00000022445	3231.64	-3.95043	1.35712	-2.91088	0.00360412	0.0832392	Cyp2d26	protein_coding
ENSMUSG00000024887	41.7325	-2.52442	0.867149	-2.91117	0.00360076	0.0832392	Asah2	protein_coding
ENSMUSG00000049940	84.567	-2.02013	0.694005	-2.91082	0.00360476	0.0832392	Pgrmc2	protein_coding
ENSMUSG00000022037	7885.98	-2.89848	0.99744	-2.90592	0.00366174	0.0839291	Clu	protein_coding
ENSMUSG00000094806	6203.1	-4.31684	1.48751	-2.90205	0.00370729	0.0840259	Cyp2d10	protein_coding
ENSMUSG00000016942	970.126	-4.16057	1.43409	-2.90118	0.00371761	0.0840259	Tmprss6	protein_coding
ENSMUSG00000026074	119.543	-2.15236	0.74272	-2.89794	0.00375623	0.0843738	Map4k4	protein_coding
ENSMUSG00000029369	351.783	-3.51284	1.21434	-2.89281	0.00381815	0.085448	Afm	protein_coding
ENSMUSG00000041698	399.697	-4.47487	1.54951	-2.88793	0.00387781	0.0862017	Slco1a1	protein_coding
ENSMUSG00000025885	20.7023	-6.53322	2.26843	-2.88006	0.00397595	0.0876841	Myo5b	protein_coding
ENSMUSG00000027358	101.118	-2.43205	0.844751	-2.87901	0.00398923	0.0877962	Bmp2	protein_coding
ENSMUSG00000029229	111.171	-2.76866	0.962217	-2.87737	0.00401002	0.0881076	Chic2	protein_coding
ENSMUSG00000089960	956.64	-3.7883	1.32001	-2.8699	0.00410598	0.0896224	Ugt1a1	protein_coding
ENSMUSG00000057880	431.169	-2.75964	0.962054	-2.86849	0.00412439	0.0897292	Abat	protein_coding
ENSMUSG00000060317	12.7391	-7.97678	2.78815	-2.86096	0.00422359	0.090228	Acnat2	protein_coding
ENSMUSG00000029680	7.98039	-7.7141	2.69646	-2.86082	0.00422548	0.090228	Hyal4	protein_coding
ENSMUSG00000032204	427.418	-3.35959	1.17445	-2.86057	0.00422875	0.090228	Aqp9	protein_coding
ENSMUSG00000024354	95.0672	-3.24578	1.13553	-2.85838	0.0042581	0.090228	Slc23a1	protein_coding
ENSMUSG00000026715	9136.3	-3.04829	1.06562	-2.86059	0.00422858	0.090228	Serpinc1	protein_coding
ENSMUSG00000009614	1766.37	-3.01632	1.05486	-2.85945	0.00424377	0.090228	Sardh	protein_coding
ENSMUSG00000038224	2656.28	-3.13418	1.0982	-2.85392	0.00431832	0.0911104	Serpinf2	protein_coding
ENSMUSG00000029195	38.0489	-6.53573	2.29466	-2.84823	0.00439635	0.0918802	Klb	protein_coding
ENSMUSG00000059142	100.978	-2.1937	0.7713	-2.84416	0.00445284	0.0927687	Zfp945	protein_coding
ENSMUSG00000073409	1408.15	-2.57112	0.904734	-2.84186	0.00448518	0.0930045	H2-Q6	protein_coding
ENSMUSG00000028755	16.4107	-4.88397	1.71896	-2.84124	0.0044938	0.0930378	Cda	protein_coding
ENSMUSG00000033634	1016.87	-2.73997	0.965012	-2.83931	0.0045211	0.0933119	Nat8f2	protein_coding
ENSMUSG00000020205	50.583	-4.68911	1.654	-2.83501	0.0045824	0.09419	Phlda1	protein_coding
ENSMUSG00000022679	62.0376	-2.6392	0.93099	-2.83483	0.00458494	0.09419	Mpv17l	protein_coding
ENSMUSG00000019889	74.2382	-4.79734	1.69567	-2.82916	0.00466696	0.0955791	Ptprk	protein_coding
ENSMUSG00000040605	45.2048	-2.92937	1.03612	-2.82725	0.00469499	0.0958572	Bace2	protein_coding
ENSMUSG00000040488	140.223	-2.44499	0.866168	-2.82277	0.00476103	0.0970563	Ltbp4	protein_coding
ENSMUSG00000002804	7640.63	-3.33495	1.18188	-2.82173	0.00477656	0.0972234	Nudt14	protein_coding
ENSMUSG00000033149	81.8966	-2.95136	1.04785	-2.81658	0.00485385	0.0980448	Phldb2	protein_coding
ENSMUSG00000031844	299.373	-3.08514	1.09567	-2.81576	0.00486621	0.0981451	Hsd17b2	protein_coding
ENSMUSG00000036106	26.9295	-2.8718	1.02085	-2.81314	0.00490599	0.0983928	Prr5	protein_coding
ENSMUSG00000022871	1203.95	-3.78566	1.34867	-2.80695	0.00500124	0.0995075	Fetub	protein_coding
ENSMUSG00000055633	8.80831	-7.49477	2.67126	-2.80571	0.00502066	0.0997443	Zfp580	protein_coding
