# Supplementary material for: Developmental programming of Kupffer cells by maternal obesity causes fatty liver disease in the offspring
Source: Research Square preprint supplement (doi:10.21203/rs.3.rs-3242837/v1), 2023-08-11
Supplement: Supplementary file 7 [file e442d831fd3f818a0f7fb8a6.xlsx]

## Sheet: Antibody panels
Table6_Antibody list sorted by flow cytometry panels
Antibodies of for myeloid cell flow cytometry for WT and Hif1a KO mice
Antigen	Conjugate	Clone	Source	Cat#
CD45	BUV805	30-F11	BD	748370
CD11b	PECy7	M1/70	BioLegend	101216
Tim-4	AF647	RMT4-54	BioLegend	130008
F4/80	BV421	BM8	BioLegend	123132
NKp46	PE	29A1.4	BioLegend	137604
CD3	PE	145-2C11	BioLegend	100308
CD19	PE	1D3/CD19	BioLegend	152408
Ly6C	BV510	HK1.4	BioLegend	128033
Ly6G	PerCP/Cy5.5	1A8	BioLegend	127616
Cx3cr1	PE-Dazzle594	SA011F11	BioLegend	149014
CD11c	BV605	N418	BioLegend	117333
CD206	BV711	C068C2	BioLegend	141727
MHC-II	AF700	M5/114.15.2	BioLegend	107622
CD172a	FITC	P84	BioLegend	144006
Xcr1	APC-Cy7	ZET	BioLegend	148224
Antibodies for HSC flow cytometry for WT and Hif1a KO mice
Antigen	Conjugate	Clone	Source	Cat#
CD11b	Biotin	M1/70	BioLegend	101204
NKp46	Biotin	29A1.4	BioLegend	137616
CD3	Biotin	145-2C11	BioLegend	100304
CD19	Biotin	6D5	BioLegend	115504
Gr1	Biotin	RB6-8C5	BioLegend	108404
Ter119	Biotin	TER-119	BioLegend	116204
c-Kit (CD117)	BV711	2B8	BioLegend	105835
Sca-1	BV510	D7	BioLegend	108129
CD48	AF647	HM48-1	BioLegend	103416
CD150	PE-Cy7	TC15-12F12.2	BioLegend	115914
CD16/32	APC-Cy7	93	BioLegend	101328
CD34	BV421	MEC14.7	BioLegend	119321
CD135	PE	A2F10	BioLegend	135306
CD127	PerCP/Cy5.5	A7R34	BioLegend	135022
Streptavidin	FITC		BioLegend	405201
Antibody for KC sorting for WT and Hif1a KO mice
Antigen	Conjugate	Clone	Source	Cat#
CD45	APC-Cy7	30-F11	BioLegend	103116
CD11b	PE-Cy7	M1/70	BD	552850
Tim4	BV786	21H12	BD	742778
F4/80	AF700	BM8	BioLegend	123130
NKp46	PE	29A1.4	BioLegend	137604
CD3	PE	145-2C11	BioLegend	100308
CD19	PE	1D3/CD19	BioLegend	152408
CD31	AF488	MEC13.3	BioLegend	102514
Antibody for blood monocyte flow cytometry for DFM mice
Antigen	Conjugate	Clone	Source	Cat#
CD19	BV421	6D5	BioLegend	115537
TCRβ	Biotin	H57-597	BioLegend	109204
CD172a	PE-Cy7	P84	BioLegend	144008
CD11b	BUV661	M1/70	BD	612977
Ly6G	PerCP-Cy5.5	1A8	BioLegend	127616
Xcr1	APC-Cy7	ZET	BioLegend	148224
Ly6C	BV510	HK1.4	BioLegend	128033
CD115	APC	AFS98	BioLegend	135510
Streptavidin	BV785		BioLegend	405249
Antibody for KC flow cytometry for DFM mice
Antigen	Conjugate	Clone	Source	Cat#
CD31	APC-Cy7	MEC13.3	BioLegend	102534
CD45	BUV805	30-F11	BD Bioscience	748370
CD11b	BUV737	OX-42	BD Bioscience	612800
Ter119	Biotin	TER-119	BioLegend	116204
TCRβ	Biotin	H57-597	BioLegend	109204
CD19	Biotin	6D5	BioLegend	115504
Siglec-F	Biotin	S17007L	BioLegend	155512
Nkp46	Biotin	29A1.4	BioLegend	137616
Cx3cr1	PE-Dazzle594	SA011F11	BioLegend	149014
CD206	BV711	C068C2	BioLegend	141727
F4/80	BV421	BM8	BioLegend	123131
Tim-4	BV786	21H12	BD	742778
Streptavidin	BUV496		BD	612961
Antibody for microglia flow cytometry for DFM mice
CD45	BUV805	30-F11	BD Bioscience	748370
CD11b	BUV737	OX-42	BD Bioscience	612800
Ly6C	BV510	HK1.4	BioLegend	128033
Ly6G	PerCP/Cy5.5	1A8	BioLegend	127616
Cx3cr1	PE-Dazzle594	SA011F11	BioLegend	149014
F4/80	BV421	BM8	BioLegend	123131
